# Supplementary material
Source: MDPI journal article supplement (https://www.mdpi.com/2311-5637/9/6/531)
Supplement: s1 [file s1]

Archive with 7 entries (7 files):
- SI2_SupplSustInd.xlsx
- SI3_SME_SMB_code.zip
- SI_Stikane_et_al_2023.pdf
- S_Table1_SMBdata.xlsx
- S_Table2_PHAdata.xlsx
- S_Table3_designs_5000.xlsx
- S_Table4_design_7600-8000.xlsx
