# Supplementary material
Source: MDPI journal article supplement (https://www.mdpi.com/2311-5637/9/6/531)
Supplement: s1 [file s1 › S_Table1_SMBdata.xlsx]

## Sheet: SMBdata
Product_group	Microorganism	Product	Substrate	Substrate_type	SMBpProduct	Ref key	Doi / patent no.
Alcohols & biofuels	Saccharomyces pastorianus	bioEOH	Glucose	Lab	0.0676844	Yang2019	10.1186/s12918-018-0675-6
Alcohols & biofuels	Saccharomyces pastorianus	bioEOH	Glucose	Lab	0.0654212	Yang2019	10.1186/s12918-018-0675-6
Alcohols & biofuels	Saccharomyces pastorianus	bioEOH	Glucose	Lab	0.0655547	Yang2019	10.1186/s12918-018-0675-6
Alcohols & biofuels	Saccharomyces pastorianus	bioEOH	Glucose	Lab	0.0639068	Yang2019	10.1186/s12918-018-0675-6
Alcohols & biofuels	Saccharomyces pastorianus	bioEOH	Glucose	Lab	0.0629503	Yang2019	10.1186/s12918-018-0675-6
Alcohols & biofuels	S. cerevisiae YIC10	bioEOH	Glucose+Fructose+YE	Lab	0.598765	Li2017	10.1016/J.SJBS.2017.01.013
Alcohols & biofuels	S. cerevisiae GIM2.71	bioEOH	Glucose+Fructose+YE	Lab	0.46875	Li2017	10.1016/J.SJBS.2017.01.013
Alcohols & biofuels	Z. mobilis	bioEOH	Glucose	Lab	0.0177778	Ajit2017	10.1016/J.FBP.2016.12.006
Alcohols & biofuels	S.carlsbergensis	bioEOH	Glucose	Lab	0.0753425	Ajit2017	10.1016/J.FBP.2016.12.006
Alcohols & biofuels	Brewer's yeast	bioEOH	Starch hydrolysate	Waste	0.129167	Lang2001	10.1080/009083101300058426
Alcohols & biofuels	S.cerevisiae (GM)	bioEOH	Xylose	Waste_mime	0.209524	Kuyper2004	10.1016/j.femsyr.2004.01.003
Alcohols & biofuels	S.cerevisiae (GM)	bioEOH	Glucose	Lab	0.1975	Kuyper2004	10.1016/j.femsyr.2004.01.003
Alcohols & biofuels	S.cerevisiae (WT)	bioEOH	Glucose	Lab	0.2475	Kuyper2004	10.1016/j.femsyr.2004.01.003
Alcohols & biofuels	yeast	bioEOH	Xylose	Waste_mime	0.0875	Sonderegger in Kuyper2004 (ref 15)	10.1016/j.femsyr.2004.01.003
Alcohols & biofuels	K. marxianus	bioEOH	Lignocelullose	Waste	4.13223	Goshima2013	https://doi.org/10.1271/bbb.130173
Alcohols & biofuels	K. marxianus	bioEOH	Lignocelullose	Waste	11.1111	Goshima2013	https://doi.org/10.1271/bbb.130173
Alcohols & biofuels	S. cerevisae	bioEOH	Lignocelullose	Waste	1.16414	Goshima2013	https://doi.org/10.1271/bbb.130173
Alcohols & biofuels	C.butyricum	PDO	glycerol	Lab	0.0707965	Chatzifragkou2011	10.1007/S00253-011-3247-X
Alcohols & biofuels	C.butyricum	PDO	crude glycerol	Waste	0.0707965	Chatzifragkou2011	10.1007/S00253-011-3247-X
Alcohols & biofuels	C.butyricum	PDO	crude glycerol	Waste	0.0334129	Chatzifragkou2011	10.1007/S00253-011-3247-X
Alcohols & biofuels	C.butyricum	PDO	crude glycerol	Waste	0.0405405	Chatzifragkou2011	10.1007/S00253-011-3247-X
Alcohols & biofuels	C.butyricum	PDO	crude glycerol	Waste	0.0220588	Chatzifragkou2011	10.1007/S00253-011-3247-X
Alcohols & biofuels	C.butyricum	PDO	pure glycerol	Lab	0.0684211	bieblGlycerolConversion3propanediol1992	10.1007/BF00183234
Alcohols & biofuels	C.butyricum	PDO	crude glycerol	Waste	0.0321839	papanikolaouBiotechnologicalValorisationRaw2008	10.1016/j.biombioe.2007.06.007
Alcohols & biofuels	K. pneumoniae (GM)	PDO	glucose	Lab	0.0941935	Lama2020	10.1016/J.YMBEN.2020.09.001
Alcohols & biofuels	C.butyricum	PDO	pure glycerol	Lab	0.0777027	gonzalez-pajueloProduction3propanediolClostridium2004	10.1007/s10295-004-0168-z
Alcohols & biofuels	C.butyricum	PDO	Crude glycerol	Waste	0.0689873	gonzalez-pajueloProduction3propanediolClostridium2004	10.1007/s10295-004-0168-z
Alcohols & biofuels	C.butyricum	PDO	pure glycerol	Lab	0.0296454	Wilkens2012	https://link.springer.com/article/10.1007/s00253-011-3595-6
Alcohols & biofuels	C.butyricum	PDO	crude glycerol	Waste	0.0379119	Wilkens2012	https://link.springer.com/article/10.1007/s00253-011-3595-6
Alcohols & biofuels	Clostridium strains	butanol	xylose, hemicellulose	Waste	1.31579	Levasseur2017	10.1016/j.apenergy.2017.04.040
Alcohols & biofuels	Clostridium acetobutylicum	butanol	CGM ( Clostridium growth medium)	Lab	0.0125	Harris2001	10.1038/sj.jim.7000191
Alcohols & biofuels	Clostridium beijerinckii	butanol	Glucose	Lab	0.174885	Qureshi2010	https://doi.org/10.1016/j.biombioe.2009.12.024
Alcohols & biofuels	Clostridium beijerinckii	butanol	overlimed barley straw hydrolysate	Waste	0.0444198	Qureshi2010	https://doi.org/10.1016/j.biombioe.2009.12.024
Alcohols & biofuels	Clostridium beijerinckii	butanol	diluted barley straw hydrolysate	Waste	0.145833	Qureshi2010	https://doi.org/10.1016/j.biombioe.2009.12.024
Alcohols & biofuels	Clostridium beijerinckii	butanol	wheat straw hydrolysate	Waste	0.616667	Qureshi2007	10.1007/s00449-007-0137-9
Alcohols & biofuels	Yarrowia lypolytica	FatAc_FAME	Glucose	Lab	0.315789	Qiao2017	10.1038/nbt.3763
Alcohols & biofuels	E.coli (K12 MH1655)	FatAc_FAME	Glucose	Lab	0.389189	Dellomonaco2011	10.1038/nature10333
Alcohols & biofuels	S. cerevisae	FatAc_FAME	LB medium	Lab	5.45455	Leber2015	10.1016/j.ymben.2014.11.006
Alcohols & biofuels	Rhodosporidium toruloides	FatAc_FAME	Glucose	Lab	0.481224	Li2007	10.1016/j.enzmictec.2007.02.008
Alcohols & biofuels	Mortierella isabellina	FatAc_FAME	crude glycerol	Waste	0.933068	papanikolaouBiotechnologicalValorisationRaw2008	10.1016/j.biombioe.2007.06.007
Alcohols & biofuels	Rhodosporidium toruloides	FatAc_FAME	glucose	Lab	0.636661	ref 27 in Qiao2017	10.1038/nbt.3763
Alcohols & biofuels	Yarrowia lypolytica	FatAc_FAME	glucose	Lab	0.620746	ref 9 in Qiao2017	10.1038/nbt.3763
Alcohols & biofuels	Yarrowia lypolytica	FatAc_FAME	glucose	Lab	0.333333	ref 11 in Qiao2017	10.1038/nbt.3763
Alcohols & biofuels	Yarrowia lypolytica	FatAc_FAME	glucose	Lab	0.449275	ref 14 in Qiao2017	10.1038/nbt.3763
Alcohols & biofuels	Yarrowia lypolytica	FatAc_FAME	glucose	Lab	0.28866	ref 34 in Qiao2017	10.1038/nbt.3763
Alcohols & biofuels	Yarrowia lypolytica	FatAc_FAME	glucose	Lab	0.176471	ref 35in Qiao2017	10.1038/nbt.3763
Alcohols & biofuels	Yarrowia lypolytica	FatAc_FAME	glucose	Lab	0.792115	ref 36 in Qiao2017	10.1038/nbt.3763
Alcohols & biofuels	Yarrowia lypolytica	FatAc_FAME	glucose	Lab	0.322751	ref 37 in Qiao2017	10.1038/nbt.3763
Alcohols & biofuels	Yarrowia lypolytica	FatAc_FAME	glucose	Lab	0.515152	Qiao2017	10.1038/nbt.3763
Alcohols & biofuels	Cryptococcus curvatus	FatAc_FAME	corn stover hydrolysate	Waste	0.541667	Nogue2018	https://doi.org/10.1039/C8GC01905C
Alcohols & biofuels	Rhodosporodium toruloides	FatAc_FAME	corn stover hydrolysate	Waste	0.625	Nogue2018	https://doi.org/10.1039/C8GC01905C
Alcohols & biofuels	Lipomyces tetrasporus	FatAc_FAME	wheat straw hydrolysate _ soy flour	Waste	0.843373	Caporusso2023	10.3390/fermentation9020180
Alcohols & biofuels	Lipomyces tetrasporus	FatAc_FAME	wheat straw hydrolysate _ urea	Waste	0.597015	Caporusso2023	10.3390/fermentation9020180
Alcohols & biofuels	Lipomyces tetrasporus	FatAc_FAME	wheat straw hydrolysate _ yeast extract	Waste	0.746835	Caporusso2023	10.3390/fermentation9020180
Alcohols & biofuels	Yarrowia lypolytica	FatAc_FAME	xylose	Waste_mime	0.86428	Sun2023	10.1021/acssynbio.2c00550
Alcohols & biofuels	Saccharomyces cerevisiae	bioEOH	Whey powder	Waste	0.322609	Zhou et al. 2019	10.1016/j.biortech.2018.10.001
Amino Acids	C. glutamicum	L-Glu	Glucose	Lab	0.122905	Aoki2005	10.1271/bbb.69.1466
Amino Acids	C. glutamicum	L-Glu	Glucose	Lab	0.125	Delaunay2002	10.1038/sj/jim/7000251
Amino Acids	Brevibacterium sp. Tc452	L-Glu	Glucose	Lab	0.247706	Choi2004	10.1016/S1389-1723(04)00268-3
Amino Acids		L-Glu	Glucose	Lab	0.364286	Choi2004	10.1016/S1389-1723(04)00268-3
Amino Acids		L-Glu	Glucose	Lab	0.295276	Choi2004	10.1016/S1389-1723(04)00268-3
Amino Acids		L-Glu	Glucose	Lab	0.244944	Choi2004	10.1016/S1389-1723(04)00268-3
Amino Acids		L-Glu	Glucose	Lab	0.248439	Choi2004	10.1016/S1389-1723(04)00268-3
Amino Acids		L-Glu	Glucose	Lab	0.224075	Choi2004	10.1016/S1389-1723(04)00268-3
Amino Acids	Bacillus	L-Glu	Glucose	Lab	0.159292	Chao1959	10.1128/jb.77.6.715-725.1959
Amino Acids	Bacillus	L-Glu	Glucose	Lab	0.0880952	Chao1959	10.1128/jb.77.6.715-725.1959
Amino Acids	C. glutamicum (GM)	L-Lys	Glucose	Lab	4.67742	Adachi2013	10.1007/S00253-013-5009-4
Amino Acids	C. glutamicum (GM)	L-Lys	Glucose	Lab	0.855936	Razak2014	10.1007/S13205-014-0252-7
Amino Acids	C. glutamicum (GM)	L-Lys	Glucose	Lab	0.790523	Razak2014	10.1007/S13205-014-0252-7
Amino Acids	C. glutamicum (GM)	L-Lys	Glucose	Lab	0.465174	Razak2014	10.1007/S13205-014-0252-7
Amino Acids	C. glutamicum (GM)	L-Lys	Glucose	Lab	0.941577	Razak2014	10.1007/S13205-014-0252-7
Amino Acids	C. glutamicum (GM)	L-Lys	Glucose	Lab	0.650342	Razak2014	10.1007/S13205-014-0252-7
Amino Acids	C. glutamicum (GM)	L-Lys	Glucose	Lab	0.795501	Razak2014	10.1007/S13205-014-0252-7
Amino Acids	C. glutamicum (GM)	L-Lys	Glucose	Lab	0.797034	Razak2014	10.1007/S13205-014-0252-7
Amino Acids	C. glutamicum (GM)	L-Lys	Glucose	Lab	0.740128	Razak2014	10.1007/S13205-014-0252-7
Amino Acids	C. glutamicum (GM)	L-Lys	Glucose	Lab	0.779516	Razak2014	10.1007/S13205-014-0252-7
Amino Acids	C. glutamicum (GM)	L-Lys	Glucose	Lab	0.561115	Razak2014	10.1007/S13205-014-0252-7
Amino Acids	Corynebacterium glutamicum	L-Lys	Yeast extract	Lab	0.360656	Coello2000	10.1016/S0960-8524(99)00170-4
Amino Acids	C/ glutamicum (GM)	L-Lys	Glucose	Lab	0.903621	Xu2014	10.1002/JCTB.4278
Amino Acids	C/ glutamicum (GM)	L-Lys	Glucose	Lab	0.609504	Xu2014	10.1002/JCTB.4278
Amino Acids		L-Lys	Glucose	Lab	0.459736	He2015	10.1007/S00449-015-1403-X
Amino Acids		L-Lys	Beet molasses	Waste	0.735537	He2015	10.1007/S00449-015-1403-X
Amino Acids		L-Lys	Beet molasses	Waste	0.388433	He2015	10.1007/S00449-015-1403-X
Amino Acids	C. glutamicum;	L-Lys	Sucrose	Lab	0.405309	Xu2018	10.1186/S12934-018-0958-Z
Amino Acids		L-Lys	Sucrose	Lab	0.45	Xu2018	10.1186/S12934-018-0958-Z
Amino Acids	C.glutamicum	L-Lys	Glucose	Lab	0.24	Ooyen2013	10.1002/ELSC.201200187
Amino Acids		L-Met	Glucose	Lab	6.34921	Qin2014	10.1002/BAB.1290
Amino Acids		L-Met	Glucose	Lab	7.3913	Kumar2003	10.1016/S0032-9592(02)00287-X
Amino Acids		L-Met	Glucose	Lab	1.83828	Zhou2019	10.1007/S13205-019-1609-8
Amino Acids	E.coli, fermentation, chemical	L-Tyr	Glucose	Lab	0.36	Patnaik2008	10.1002/bit.21765
Amino Acids		L-Phe	Glucose	Lab	0.869565	konstantinovPhysiologicallyMotivatedStrategies1991	10.1016/0922-338X(91)90349-L
Amino Acids		L-Phe	Glucose	Lab	0.46	backmanGeneticEngineeringMetabolic1990	10.1111/j.1749-6632.1990.tb24231.x
Amino Acids		L-Phe	Crude glycerol + lactic acid	Waste	222	Weiner2014	10.1016/j.bej.2013.12.001
Amino Acids	E.coli (GMO)	L-Thr	Glucose	Lab	0.232203	Chen2008	10.1007/S12010-008-8385-Y
Amino Acids	E.coli (GMO)	L-Thr	Glucose	Lab	0.28803	Lee2006	10.1263/JBB.101.127
Amino Acids	E.coli (GMO)	L-Thr	Glucose	Lab	0.854056	Lee2007	10.1038/MSB4100196
Amino Acids	E.coli (GMO)	L-Thr	Sucrose	Lab	0.818107	Wang2014	10.1080/13102818.2014.927682
Amino Acids	C.glutamicum (GM)	L-Glu	Rice straw hydrolysate	Waste	0.767423	Gopinath2011	10.1007/S00253-011-3478-X
Amino Acids	C.glutamicum (GM)	L-Glu	Wheat bran hydrolysate	Waste	0.814245	Gopinath2011	10.1007/S00253-011-3478-X
Amino Acids		L-Lys	Rice straw hydrolysate	Waste	1.7101	Gopinath2011	10.1007/S00253-011-3478-X
Amino Acids	C. glutamicum (GM)	L-Lys	Wheat bran hydrolysate	Waste	1.9544	Gopinath2011	10.1007/S00253-011-3478-X
Amino Acids	C. glutamicum (GM)	L-Lys	xylose/arabinos/glucose MM	Waste_mime	1.2168	Gopinath2011	10.1007/S00253-011-3478-X
Amino Acids	C. glutamicum (GM)	L-Lys	xylose/arabinos/glucose MM	Waste_mime	2.13062	Gopinath2011	10.1007/S00253-011-3478-X
Amino Acids	Corynebacterium glutamicum	L-Lys	Fish silage	Waste	0.333333	Coello2000	10.1016/S0960-8524(99)00170-4
Amino Acids	C. glutamicum (GM)	L-Lys	Cellobiose	Waste	5.9537	Adachi2013	10.1007/S00253-013-5009-4
Amino Acids		L-Lys	Sugar beet molasses	Waste	0.27239	Becker2011	10.1016/j.ymben.2011.01.003
Amino Acids	C. glutamicum;	L-Lys	Raw corn starch	Waste	1.68874	Tateno2007	10.1007/s00253-006-0766-y	, OD calculated using Becker2011 and 0.255 gCDM/OD
Amino Acids	C. glutamicum (GM)	L-Lys	Cellobiose	Waste	5.9537	Adachi2013	10.1007/S00253-013-5009-4
Amino Acids	E.coli (GMO)	L-Thr	Sucrose	Lab	0.625	Chen2008	10.1007/S12010-008-8385-Y
Organic Acids	Pichia stipitis	LacA	Xylose	Waste_mime	0.36	Ilmen2007	10.1128/AEM.01311-06
Organic Acids		LacA	Glucose	Lab	0.675	Ilmen2007	10.1128/AEM.01311-06
Organic Acids	Rhizopus sp.	LacA	Glucose	Lab	0.0344444	Liu2006	10.1263/JBB.101.9
Organic Acids	Rhizopus sp.	LacA	Glucose	Lab	0.0377778	Liu2006	10.1263/JBB.101.9
Organic Acids	S. cerevisae	LacA	Glucose	Lab	0.117857	Valli2006	10.1128/AEM.00683-06
Organic Acids	L. bulgaricus	LacA	Lactose	Lab	0.193622	Mehaia1987	10.1007/BF02798495
Organic Acids	Acetobacter pasteurianus	AcA	Glucose + Ethanol	Lab	0.0127421	Qi2014	10.1111/IJFS.12324
Organic Acids	Acetobacter pasteurianus	AcA	Glucose + Ethanol	Lab	0.0103778	Qi2014	10.1111/IJFS.12324
Organic Acids	Acetobacter pasteurianus	AcA	Glucose + Ethanol	Lab	0.00788889	Song2022	https://doi.org/10.3389/fbioe.2022.815614
Organic Acids	Clostridium formicoaceticum	AcA	corn meal hydrolyzate	Waste	0.394737	Huang2002	https://doi.org/10.1016/S0960-8524(01)00151-1
Organic Acids	Acetobacter pasteurianus	AcA	glucose, yeast extract, alcohol	Lab	0.0745098	Yin2018	https://link.springer.com/article/10.1007/s10068-017-0283-z
Organic Acids	Lactobacillus casei	LacA	Maize grain	Waste	0.492	Ogmundarson2019 (SI1), thesis	https://orbit.dtu.dk/en/publications/life-cycle-assessment-of-chosen-biochemicals-and-bio-based-polyme
Organic Acids	Lactobacillus casei	LacA	Corn stover	Waste	0.7	Ogmundarson2019 (SI1), thesis	https://orbit.dtu.dk/en/publications/life-cycle-assessment-of-chosen-biochemicals-and-bio-based-polyme
Organic Acids	Lactobacillus casei	LacA	Lactobacillus casei, algae	Waste	0.21	Ogmundarson2019 (SI1), thesis	https://orbit.dtu.dk/en/publications/life-cycle-assessment-of-chosen-biochemicals-and-bio-based-polyme
Organic Acids	Enterococcus faecalis	LacA	molasses	Waste	0.15047	Wee2004	10.1016/j.enzmictec.2004.08.008
Organic Acids	Lactobacillus lactis	LacA	Hydrolyzed cane sugar	Waste	0.0617284	Joshi2010	10.1007/S10529-009-0187-Y
Organic Acids	Enterococcus faecalis	LacA	Agricultural resources ( flour)	Waste	0.120466	Oh2005	10.1016/j.biortech.2004.11.020
Organic Acids	Lactobacillus sp.	LacA	Sugar-cane juice	Waste	0.0308642	Timbuntam2006	10.1007/S10529-006-9003-0
Organic Acids	Lactobacillus plantarum	LacA	Corn cobs and dairy wastewater?	Waste	0.201794	David et al. 2022	10.1016/j.biortech.2022.126815
Organic Acids	Gluconobacter oxydans, Saccharomyces cerevisiae	galact.A	Cheese whey powder	Waste	0.348837	Zhou et al. 2019	10.1016/j.biortech.2018.10.001
Organic Acids	Aspergillus terreus	itacA	Sago Starch	Waste	0.134855	Dwiarti2007	10.1016/j.biortech.2006.03.016
Organic Acids	Aspergillus terreus	itacA	Glucose	Lab	0.097561	Yahiro1995	10.1016/0922-338X(95)91272-7
Organic Acids	Aspergillus terreus	itacA	Glucose	Lab	0.0879121	Kuenz2012	10.1007/s00253-012-4221-y
Organic Acids	Aspergillus terreus	itacA	Glucose	Lab	0.0952381	Okabe1993	10.1016/0922-338X(93)90067-I
Organic Acids	Aspergillus terreus	itacA	Glucose	Lab	0.0968992	Hevekerl2014	10.1007/S00253-014-6047-2
Organic Acids	Aspergillus terreus	itacA	Glucose	Lab	0.185315	Riscaldati2000	10.1016/S0168-1656(00)00322-9
Organic Acids	Aspergillus niger	citrA	Banana peel	Waste	0.105882	Karthikeyan2010	10.1016/J.BIORTECH.2010.02.063
Organic Acids	Aspergillus niger	citrA	Black strap molasses	Waste	0.3125	Haq2001	10.1023/A:1016625130070
Organic Acids	Aspergillus niger CGMCC 10142	citrA	Liquified corn medium	Waste	0.0430802	Wang2016	10.1007/S00253-016-7324-Z
Organic Acids	Aspergillus niger	citrA	Beet molasses	Waste	0.207137	Lotfy2007	10.1016/J.BIORTECH.2006.11.007
Organic Acids	Aspergillus niger	citrA	Cane molasses	Waste	0.207137	Lotfy2007	10.1016/J.BIORTECH.2006.11.007
Organic Acids	#N/A	citrA	sucrose	Lab	0.237525	Lotfy2007	10.1016/J.BIORTECH.2006.11.007
Organic Acids	Aspergillus niger	citrA	Cane molasses	Waste	0.110035	IkramUI2004	10.1016/J.BIORTECH.2003.10.018
Organic Acids	Yarrowia lipolytica	citrA	n-paraffins	Waste	0.494949	Crolla2004	10.1016/J.JBIOTEC.2004.01.007
Organic Acids	Yarrowia lipolytica	citrA	Glucose	Lab	0.167832	Papanikolaou2006	10.1007/S00284-005-0223-7
Organic Acids	Yarrowia lipolytica	citrA	Sucrose	Lab	0.0571429	Forster2007	10.1007/S00253-007-0958-0
Organic Acids	Yarrowia lipolytica	citrA	crude glycerol	Waste	0.1184	papanikolaouBiotechnologicalValorisationRaw2008	10.1016/j.biombioe.2007.06.007
Organic Acids	Anaerobiospirillum succiniciproducens	succA	Glucose	Lab	0.0666667	Meynial-Salles2008	10.1002/BIT.21521
Organic Acids	E.coli (GMO)	succA	Glucose	Lab	0.354167	Liang2013	10.1016/J.BIORTECH.2013.06.031
Organic Acids	Mannheimia succiniciproducens(GMO)	succA	Glucose	Lab	0.0477099	Lee2006a	10.1128/AEM.72.3.1939-1948.2006
Organic Acids	Basfia succiniciproducens	succA	Glucose	Lab	0.35	Becker2013	10.1002/BIT.24963
Organic Acids	Mannheimia succiniciproducens	succA	Sucrose & Glycerol	Lab	0.0299197	US8691516B2	Patent No. US8691516B2
Polymers	Cnecator	PHA	Glycerol	Waste_mime	1.5	Das2018	10.1016/j.procbio.2018.05.017
Polymers	Ecoli	PHA	Starch	Waste_mime	0.935484	Bhatia2015	10.1007/s00449-015-1390-y
Polymers	Lactococcus lactis	PHA	Xylose	Waste_mime	0.801802	Tanaka1995	10.1139/m95-194
Polymers	Ecoli	PHA	Glucose	Lab	0.370763	Choi1998	10.1128/aem.64.12.4897-4903.1998
Polymers	Ecoli	PHA	Molasses	Waste	0.253165	Liu1998	10.1023/A:1005367011378
Polymers	Ecoli	PHA	lactose from whey	Waste	0.242204	Ahn2000	10.1128/aem.66.8.3624-3627.2000
Polymers	Ecoli	PHA	Glucose +propioni; oleic acid	Lab	0.278967	Choi1999	10.1128/AEM.65.10.4363-4368.1999
Polymers	Ecoli	PHA	Decanoic acid	Lab	1.62626	Qi1998	10.1111/j.1574-6968.1998.tb13212.x
Polymers	Ecoli	PHA	Cellulose (lab scale)	Waste_mime	11.1507	Gao2015	10.1186/s12934-015-0349-7
Polymers	Ecoli	PHA	Glucose	Lab	6.02247	Gao2015	10.1186/s12934-015-0349-7
Polymers	Ecoli	PHA	Glucose	Lab	0.248768	ref 58 in Lee1996	10.1016/0168-1656(94)90183-X
Polymers	Ecoli	PHA	Glucose	Lab	1.67786	ref 17 in Lee1997	https://doi.org/10.1007/BF02067442
Polymers	Ecoli	PHA	Sucrose	Lab	2.63265	ref 57 in Lee1996	https://doi.org/10.1007/BF00131766
Polymers	Lactobacillus bulgaricus	PHA	MRS broth (glucose)	Lab	1.7933	Aslim1998	10.1016/S0378-1097(97)00557-0
Polymers	Ecoli	PHA			0.539409	KR102067342B1	Patent No. KR102067342B1
Polymers	Cnecator	PHA			0.180638	CN102226206A	Patent No. CN102226206A
Polymers	Ecoli	PHA			1.85714	TW201315809A	Patent No. TW201315809A
Polymers	Cnecator	PHA	jatropha oil	Waste	0.296774	Batcha2014 in Sirohi2020	10.1007/s00449-013-1066-4
Polymers	Cnecator	PHA	waste glycerol	Waste	1.63158	Cavalheiro2009 in	10.1016/j.procbio.2009.01.008
Polymers	Cnecator	PHA	cooking oil	Waste	0.587302	Cruz2015	10.1016/j.jbiotec.2014.11.022
Polymers	Cnecator	PHA	spent coffee grounds oil	Waste	0.282051	Cruz2014	10.1016/j.biortech.2014.02.013
Polymers	Bacillus spp	PHA	Cassava starch	Waste	2.36721	Krueger2012	10.2225/vol15-issue3-fulltext-6
Polymers	Cnecator	PHA	Wheat hydrolysate	Waste	0.0752457	Xu2010	https://www.sciencedirect.com/science/article/pii/S1359511309002797
Polymers	Cnecator	PHA	Cassava starch	Waste	0.623606	Poomipuka2014	10.1016/j.ijbiomac.2014.01.002
Polymers	Cnecator	PHA	Beer brewery wastewater and maltose	Waste	1.63333	Amini2020	10.1016/j.jece.2019.103588
Polymers	Bacillus spp	PHA	Glycerol	Waste_mime	0.173423	Morya2018	10.1016/j.biteb.2018.03.002
Polymers	Cnecator	PHA	Glucose	Lab	0.355372	kimProductionPoly3hydroxybutyric1994	10.1002/bit.260430908
Polymers	Cnecator	PHA	Waste_rapeseed oil	Waste	0.314286	obrucaProductionPoly3hydroxybutyrateco3hydroxyvalerate2010	10.1007/s10529-010-0376-8
Polymers	Cnecator	PHA	Date_seed oil	Waste	0.219201	yousufNovelPolyhydroxybutyratePHB	https://www.proquest.com/docview/2116952378/abstract/93DDC66260A64221PQ/1
Polymers	Alata	PHA	Sucrose	Lab	0.176471	yousufNovelPolyhydroxybutyratePHB reference Kessler	10.1002/0471250589.ebt168
Polymers	Halomonas sp.	PHA	Fructose	Lab	0.0570825	parkFructoseBasedHyper2020	10.1016/j.ijbiomac.2020.03.129
Polymers	Halomonas sp.	PHA	Glucose	Lab	0.234568	quillaguamanPoly3hydroxybutyrateProduction2008	10.1007/s00253-007-1297-x
Polymers	Cnecator	PHA	Glucose+propionate	Lab	0.350427	kimProductionPoly3hydroxybutyric1994	10.1002/bit.260430908
Polymers	Azotobacter vinelandii	PHA	Glucose	Lab	0.176471	williamj.pageGrowthAzotobacterVinelandii1993	10.1128/aem.59.12.4236-4244.1993
Polymers	Azohydromonas australica	PHA	Sucrose	Lab	0.379487	gahlawatEnhancedProductionPoly2012	10.1007/s10295-012-1138-5
Polymers	Bacillus spp	PHA	Sugarcane baggase	Waste	0.440678	Sakthiselvan2018	10.1016/j.eaef.2018.03.003
Polymers	Cnecator	PHA	Paddy straw	Waste	1.66297	Sandhya2013	10.1007/s13762-012-0070-6
Polymers	Cnecator	PHA	Kenaf biomass	Waste	0.912682	Saratale2019	10.1016/j.biortech.2019.02.083
Polymers	Cnecator	PHA	Sugarcane vinnase and molasses	Waste	0.78547	Dalsasso2019	10.1016/j.procbio.2019.07.007
Polymers	Cnecator	PHA	Molasses	Waste	2.71429	Sen2019	10.1016/j.bcab.2018.11.006
Polymers	Pseudomonas spp	PHA	Crude glycerol	Waste	1.63158	Ashby2011	10.1007/s11746-011-1755-6
Polymers	Cnecator	PHA	Kitchen waste	Waste	0.183607	Omar2011	10.5897/AJMR11.156
Polymers	Haloferax mediterranei	PHA	Macroalgal biomass	Waste	0.727273	Ghosh2019	10.1016/j.biortech.2018.09.108
Polymers	Pseudomonas spp	PHA	Biodiesel liquid waste	Waste	0.403846	Chanasit2016	10.1080/09168451.2016.1158628
Polymers	Bacillus spp	PHA	Sugarcane baggase	Waste	0.8	Getachew2016	10.1186/s13104-016-2321-y
Polymers	Bacillus spp	PHA	Corn cob	Waste	0.9375	Getachew2016	10.1186/s13104-016-2321-y
Polymers	Bacillus spp	PHA	Banana peel	Waste	2.71429	Getachew2016	10.1186/s13104-016-2321-y
Polymers	Bacillus spp	PHA	Teff straw	Waste	1.59375	Getachew2016	10.1186/s13104-016-2321-y
Polymers	Bacillus spp	PHA	Glucose	Lab	0.639344	Getachew2016	10.1186/s13104-016-2321-y
Polymers	Bacillus spp	PHA	Sucrose	Lab	1.04762	Getachew2016	10.1186/s13104-016-2321-y
Polymers	Bacillus spp	PHA	Fructose	Lab	0.846154	Getachew2016	10.1186/s13104-016-2321-y
Polymers	Cnecator	PHA	Fructose	Lab	1.32143	Khanna2005	https://doi.org/10.1016/j.procbio.2004.08.011
Polymers	Loktanella sp.	PHA	Pine tree	Waste	0.278689	Lee2022	https://doi.org/10.1016/j.ijbiomac.2022.03.155
Polymers	Loktanella sp.	PHA	Miscanthus	Waste	0.445087	Lee2022	https://doi.org/10.1016/j.ijbiomac.2022.03.155
Polymers	Loktanella sp.	PHA	Barley straw	Waste	0.636905	Lee2022	https://doi.org/10.1016/j.ijbiomac.2022.03.155
Polymers	Loktanella sp.	PHA	Glucose	Lab	0.333333	Lee2022	https://doi.org/10.1016/j.ijbiomac.2022.03.155
Polymers	Bacillus spp	PHA	Xylose	Waste_mime	0.831166	Lopes2009	https://link.springer.com/article/10.1007/s11274-009-0072-9
Polymers	Bacillus spp	PHA	Xylose	Waste_mime	0.823487	Lopes2009	https://link.springer.com/article/10.1007/s11274-009-0072-9
Polymers	Bacillus spp	PHA	Xylose	Waste_mime	1.1427	Lopes2009	https://link.springer.com/article/10.1007/s11274-009-0072-9
Organic Acids	Aspergillus terreus	itacA	Glucose	Lab	0.1375	Krull2017	https://link.springer.com/article/10.1007/s00253-017-8192-x
Organic Acids	Aspergillus terreus	itacA	Corn starch (acid hydrolyzed)	Waste	0.5	Reddy2002	https://doi.org/10.1016/S0960-8524(02)00075-5
Organic Acids	Aspergillus terreus	itacA	Corn starch (acid hydrolyzed)	Waste	0.305263	Reddy2002	https://doi.org/10.1016/S0960-8524(02)00075-5
Organic Acids	Aspergillus terreus	itacA	Corn starch (acid hydrolyzed)	Waste	0.27	Reddy2002	https://doi.org/10.1016/S0960-8524(02)00075-5
Organic Acids	Aspergillus terreus	itacA	Corn starch (enzyme hydrolyzed)	Waste	0.433333	Reddy2002	https://doi.org/10.1016/S0960-8524(02)00075-5
Organic Acids	Aspergillus terreus	itacA	Corn starch (enzyme hydrolyzed)	Waste	0.268293	Reddy2002	https://doi.org/10.1016/S0960-8524(02)00075-5
Organic Acids	Aspergillus terreus	itacA	Corn starch (enzyme hydrolyzed)	Waste	0.240476	Reddy2002	https://doi.org/10.1016/S0960-8524(02)00075-5
Organic Acids	Aspergillus terreus	itacA	Market refuse apple	Waste	0.508696	Reddy2002	https://doi.org/10.1016/S0960-8524(02)00075-5
Organic Acids	Aspergillus terreus	itacA	apple_market refuse	Waste	0.305556	Reddy2002	https://doi.org/10.1016/S0960-8524(02)00075-5
Organic Acids	Aspergillus terreus	itacA	apple_market refuse	Waste	0.281081	Reddy2002	https://doi.org/10.1016/S0960-8524(02)00075-5
Organic Acids	Aspergillus terreus	itacA	banana_market refuse	Waste	0.486364	Reddy2002	https://doi.org/10.1016/S0960-8524(02)00075-5
Organic Acids	Aspergillus terreus	itacA	banana_market refuse	Waste	0.294286	Reddy2002	https://doi.org/10.1016/S0960-8524(02)00075-5
Organic Acids	Aspergillus terreus	itacA	banana_market refuse	Waste	0.288571	Reddy2002	https://doi.org/10.1016/S0960-8524(02)00075-5
Organic Acids	A. succinogenes (Aspergillus awamori, Aspergillus oryzae)	succA	Bread hydrolysate	Waste	0.0900634	Leung2012	https://doi.org/10.1016/j.bej.2012.03.010
Organic Acids	Saccharomyces cerevisiae	succA	Glucose	Lab	100	Otero2013	https://doi.org/10.1371/journal.pone.0054144
Organic Acids	Saccharomyces cerevisiae (GM)	succA	Glucose	Lab	7.14286	Otero2013	https://doi.org/10.1371/journal.pone.0054144
Organic Acids	Saccharomyces cerevisiae (GM)	succA	Glucose	Lab	3.33333	Otero2013	https://doi.org/10.1371/journal.pone.0054144
Organic Acids	Saccharomyces cerevisiae (GM)	succA	Glucose	Lab	2.32558	Otero2013	https://doi.org/10.1371/journal.pone.0054144
Organic Acids	A. succinogenes (Aspergillus awamori, Aspergillus oryzae)	succA	Wheat milling bran	Waste	0.065104	Dorado2009	https://doi.org/10.1016/j.jbiotec.2009.06.009
Organic Acids	Actinobacillus succinogens 130Z	succA	Sake lee hydrolysate	Waste	0.555556	Chen2010	https://doi.org/10.1016/j.enzmictec.2010.06.011
Organic Acids	Actinobacillus succinogens 130Z	succA	Sake lee hydrolysate	Waste	0.589928	Chen2010	https://doi.org/10.1016/j.enzmictec.2010.06.011
Organic Acids	Actinobacillus succinogens 130Z	succA	Sake lee hydrolysate	Waste	0.492063	Chen2010	https://doi.org/10.1016/j.enzmictec.2010.06.011
Organic Acids	Actinobacillus succinogens 130Z	succA	Sake lee hydrolysate	Waste	0.474104	Chen2010	https://doi.org/10.1016/j.enzmictec.2010.06.011
Organic Acids	Actinobacillus succinogens 130Z	succA	Sake lee hydrolysate	Waste	0.442177	Chen2010	https://doi.org/10.1016/j.enzmictec.2010.06.011
Organic Acids	Corynebacterium glutamicum	succA	Corn cob hydrolysate	Waste	0.306373	Wang2013	https://link.springer.com/article/10.1007/s12010-013-0539-x
Organic Acids	Actinobacillus succinogenes CGMCC1593	succA	Glucose	Lab	0.0805926	Liu2008	10.1002/jctb.1862
Organic Acids	Actinobacillus succinogenes CGMCC1593	succA	Glucose	Lab	0.0606202	Liu2008	10.1002/jctb.1862
