# Supplementary material
Source: MDPI journal article supplement (https://www.mdpi.com/2311-5637/9/6/531)
Supplement: s1 [file s1 › S_Table2_PHAdata.xlsx]

## Sheet: PHAdata
Product_group	Microorganism	Product	Substrate	Substrate_type	Product_Yield	PY_units	SMB_yield	SMBY_units	SMBpProduct	Ref key	Doi / patent no.	fed batch?
Polymers	Cnecator	PHA	Glycerol	Waste_mimick	0.54	g/L	0.81	g/L	1.5	Das2018	10.1016/j.procbio.2018.05.017	no	batch
Polymers	Ecoli	PHA	Starch	Waste_mimick	1.24	g/L	1.16	g/L	0.935484	Bhatia2015	10.1007/s00449-015-1390-y	no	batch
Polymers	Ecoli	PHA	Glucose	Lab	141.6	g/L	52.5	g/L	0.370763	Choi1998	10.1128/aem.64.12.4897-4903.1998	yes
Polymers	Ecoli	PHA	Molasses	Waste	31.6	g/L	7.9	g/L	0.253165	Liu1998	10.1023/A:1005367011378	yes
Polymers	Ecoli	PHA	lactose from whey	Waste	96.2	g/L	23.3	g/L	0.242204	Ahn2000	10.1128/aem.66.8.3624-3627.2000	yes
Polymers	Ecoli	PHA	Glucose +propioni; oleic acid	Lab	158.824	g/L	44.2758	g/L	0.278967	Choi1999	10.1128/AEM.65.10.4363-4368.1999	yes
Polymers	Ecoli	PHA	Decanoic acid	Lab	0.988	g/L	1.612	g/L	1.62626	Qi1998	10.1111/j.1574-6968.1998.tb13212.x	no	stirred reactor
Polymers	Ecoli	PHA	Glucose	Lab	81.2	g/L	20.2	g/L	0.248768	ref 58 in Lee1996	10.1016/0168-1656(94)90183-X	yes
Polymers	Ecoli	PHA	Glucose	Lab	65.5	g/L	109.9	g/L	1.67786	ref 17 in Lee1997	https://doi.org/10.1007/BF02067442	yes
Polymers	Ecoli	PHA	Sucrose	Lab	34.3	g/L	90.3	g/L	2.63265	ref 57 in Lee1996	https://doi.org/10.1007/BF00131766	yes
Polymers	Lactobacillus bulgaricus	PHA	Glucose	Lab	0.86	g/L	1.54	g/L	1.7933	Aslim1998	10.1016/S0378-1097(97)00557-0	yes
Polymers	Cnecator	PHA	jatropha oil	Waste	15.5	g/L	4.6	g/L	0.296774	Batcha2014 in Sirohi2020	10.1007/s00449-013-1066-4	no	flask
Polymers	Cnecator	PHA	waste glycerol	Waste	26.144	g/L	42.656	g/L	1.63158	Cavalheiro2009 in	10.1016/j.procbio.2009.01.008	yes
Polymers	Cnecator	PHA	cooking oil	Waste	7.308	g/L	4.292	g/L	0.587302	Cruz2015	10.1016/j.jbiotec.2014.11.022	no	batch, bioreactor
Polymers	Cnecator	PHA	spent coffee grounds oil	Waste	13.026	g/L	3.674	g/L	0.282051	Cruz2014	10.1016/j.biortech.2014.02.013	yes
Polymers	Bacillus spp	PHA	Cassava starch	Waste	1.476	g/L	3.494	g/L	2.36721	Krueger2012	10.2225/vol15-issue3-fulltext-6	no
Polymers	Cnecator	PHA	Wheat hydrolysate	Waste	162.8	g/L	12.25	g/L	0.0752457	Xu2010	https://www.sciencedirect.com/science/article/pii/S1359511309002797	yes
Polymers	Cnecator	PHA	Cassava starch	Waste	3.677	g/L	2.293	g/L	0.623606	Poomipuka2014	10.1016/j.ijbiomac.2014.01.002	no	flask
Polymers	Cnecator	PHA	Beer brewery wastewater and maltose	Waste	3	g/L	4.9	g/L	1.63333	Amini2020	10.1016/j.jece.2019.103588	no	flask
Polymers	Bacillus spp	PHA	Glycerol	Waste_mimick	4.44	g/L	0.77	g/L	0.173423	Morya2018	10.1016/j.biteb.2018.03.002	no	flask
Polymers	Cnecator	PHA	Glucose	Lab	121	g/L	43	g/L	0.355372	kimProductionPoly3hydroxybutyric1994	10.1002/bit.260430908	yes
Polymers	Cnecator	PHA	Waste_rapeseed oil	Waste	105	g/L	33	g/L	0.314286	obrucaProductionPoly3hydroxybutyrateco3hydroxyvalerate2010	10.1007/s10529-010-0376-8	yes
Polymers	Cnecator	PHA	Date_seed oil	Waste	11.77	g/L	2.58	g/L	0.219201	yousufNovelPolyhydroxybutyratePHB	https://www.proquest.com/docview/2116952378/abstract/93DDC66260A64221PQ/1	no	flask
Polymers	Alata	PHA	Sucrose	Lab	60	g/L	10.5882	g/L	0.176471	yousufNovelPolyhydroxybutyratePHB reference Kessler	10.1002/0471250589.ebt168	??
Polymers	Halomonas sp.	PHA	Fructose	Lab	8.65773	g/L	0.49227	g/L	0.0570825	parkFructoseBasedHyper2020	10.1016/j.ijbiomac.2020.03.129	no	batch
Polymers	Halomonas sp.	PHA	Glucose	Lab	35.64	g/L	8.36	g/L	0.234568	quillaguamanPoly3hydroxybutyrateProduction2008	10.1007/s00253-007-1297-x	yes
Polymers	Cnecator	PHA	Glucose+propionate	Lab	117	g/L	41	g/L	0.350427	kimProductionPoly3hydroxybutyric1994	10.1002/bit.260430908	yes
Polymers	Azotobacter vinelandii	PHA	Glucose	Lab	25	g/L	4.41176	g/L	0.176471	williamj.pageGrowthAzotobacterVinelandii1993	10.1128/aem.59.12.4236-4244.1993	yes
Polymers	Azohydromonas australica	PHA	Sucrose	Lab	7.8	g/L	2.96	g/L	0.379487	gahlawatEnhancedProductionPoly2012	10.1007/s10295-012-1138-5	no	air-lift, batch
Polymers	Bacillus spp	PHA	Sugarcane baggase	Waste	5.9	g/L	2.6	g/L	0.440678	Sakthiselvan2018	10.1016/j.eaef.2018.03.003	no	batch
Polymers	Cnecator	PHA	Paddy straw	Waste	7.21	g/L	11.99	g/L	1.66297	Sandhya2013	10.1007/s13762-012-0070-6	no	flask
Polymers	Cnecator	PHA	Kenaf biomass	Waste	4.81	g/L	4.39	g/L	0.912682	Saratale2019	10.1016/j.biortech.2019.02.083	no	batch
Polymers	Cnecator	PHA	Sugarcane vinnase and molasses	Waste	11.7	g/L	9.19	g/L	0.78547	Dalsasso2019	10.1016/j.procbio.2019.07.007	yes
Polymers	Cnecator	PHA	Molasses	Waste	0.77	g/L	2.09	g/L	2.71429	Sen2019	10.1016/j.bcab.2018.11.006	no	flask
Polymers	Pseudomonas spp	PHA	Crude glycerol	Waste	1.14	g/L	1.86	g/L	1.63158	Ashby2011	10.1007/s11746-011-1755-6	no	batch, bioreactor
Polymers	Cnecator	PHA	Kitchen waste	Waste	12.2	g/g	2.24	g/g	0.183607	Omar2011	10.5897/AJMR11.156	yes
Polymers	Haloferax mediterranei	PHA	Macroalgal biomass	Waste	2.2	g/L	1.6	g/L	0.727273	Ghosh2019	10.1016/j.biortech.2018.09.108	no
Polymers	Pseudomonas spp	PHA	Biodiesel liquid waste	Waste	2.6	g/L	1.05	g/L	0.403846	Chanasit2016	10.1080/09168451.2016.1158628	no	flask
Polymers	Bacillus spp	PHA	Sugarcane baggase	Waste	5	PHB g/L	9	DCW g/L	0.8	Getachew2016	10.1186/s13104-016-2321-y	no	flask
Polymers	Bacillus spp	PHA	Corn cob	Waste	4.8	PHB g/L	9.3	DCW g/L	0.9375	Getachew2016	10.1186/s13104-016-2321-y	no	flask
Polymers	Bacillus spp	PHA	Banana peel	Waste	2.1	PHB g/L	7.8	DCW g/L	2.71429	Getachew2016	10.1186/s13104-016-2321-y	no	flask
Polymers	Bacillus spp	PHA	Teff straw	Waste	3.2	PHB g/L	8.3	DCW g/L	1.59375	Getachew2016	10.1186/s13104-016-2321-y	no	flask
Polymers	Bacillus spp	PHA	Glucose	Lab	6.1	PHB g/L	10	DCW g/L	0.639344	Getachew2016	10.1186/s13104-016-2321-y	no	flask
Polymers	Bacillus spp	PHA	Sucrose	Lab	4.2	PHB g/L	8.6	DCW g/L	1.04762	Getachew2016	10.1186/s13104-016-2321-y	no	flask
Polymers	Bacillus spp	PHA	Fructose	Lab	5.2	PHB g/L	9.6	DCW g/L	0.846154	Getachew2016	10.1186/s13104-016-2321-y	no	flask
Polymers	Cnecator	PHA	Fructose	Lab	1.4	PHB g/L	3.25	DCW g/L	1.32143	Khanna2005	https://doi.org/10.1016/j.procbio.2004.08.011	no	flask
Polymers	Loktanella sp.	PHA	Pine tree	Waste	3.66	PHB g/L	4.68	DCW g/L	0.278689	Lee2022	https://doi.org/10.1016/j.ijbiomac.2022.03.155	no	flask
Polymers	Loktanella sp.	PHA	Miscanthus	Waste	3.46	PHB g/L	5	DCW g/L	0.445087	Lee2022	https://doi.org/10.1016/j.ijbiomac.2022.03.155	no	flask
Polymers	Loktanella sp.	PHA	Barley straw	Waste	3.36	PHB g/L	5.5	DCW g/L	0.636905	Lee2022	https://doi.org/10.1016/j.ijbiomac.2022.03.155	no	flask
Polymers	Loktanella sp.	PHA	Glucose	Lab	1.68	PHB g/L	2.24	DCW g/L	0.333333	Lee2022	https://doi.org/10.1016/j.ijbiomac.2022.03.155	no	flask
Polymers	Bacillus spp	PHA	Xylose	Waste_mimick	2.99263	PHB g/L	5.48	DCW g/L	0.831166	Lopes2009	https://link.springer.com/article/10.1007/s11274-009-0072-9	no	flask
Polymers	Bacillus spp	PHA	Xylose	Waste_mimick	2.28134	PHB g/L	4.16	DCW g/L	0.823487	Lopes2009	https://link.springer.com/article/10.1007/s11274-009-0072-9	no	flask
Polymers	Bacillus spp	PHA	Xylose	Waste_mimick	1.07341	PHB g/L	2.3	DCW g/L	1.1427	Lopes2009	https://link.springer.com/article/10.1007/s11274-009-0072-9	no	flask
