# Supplementary material
Source: MDPI journal article supplement (https://www.mdpi.com/2311-5637/9/6/531)
Supplement: s1 [file s1 › S_Table3_designs_5000.xlsx]

## Sheet: Top 5000 designs
Rank	Fitness Score	Product	Product flux (mmol/gDW/h	Substrate flux (mmol/gDW/h2	Maximal growth rate (1/h)	Nr of deletions	Minimal ISS at max growth (1e-4 USD/gDW/h)	Minimal ISS at 0 growth (1e-4 USD/gDW/h)	Environmental SI at max growth (1e-4 USD/gDW/h)	Economic SI at max growth (1e-4 USD/gDW/h)	Social SI at max growth (1e-4 USD/gDW/h)	Gene deletions	Deleted reactions
1	-59.0846	EX_succ_e	7.97599	-7.5	0.157559	5	34.9228	-10.6764	-2.79929	27.7291	9.99301	b3844, b4117, b0010, b3927, b1380	ACt2rpp, ARGDC, FADRx, FE3Ri, FLVRx, GLYALDtpp, GLYtpp, LDH_D, UREAtpp
2	-59.0846	EX_succ_e	7.97599	-7.5	0.157559	5	34.9228	-10.6764	-2.79929	27.7291	9.99301	b3844, b0010, b4115, b3927, b1380	ACt2rpp, ARGAGMt7pp, FADRx, FE3Ri, FLVRx, GLYALDtpp, GLYtpp, LDH_D, UREAtpp
3	-59.0822	EX_succ_e	7.97599	-7.5	0.157559	6	34.9228	-10.4813	-2.79929	27.7291	9.99301	b3844, b2463, b0010, b4115, b3927, b1380	ACt2rpp, ARGAGMt7pp, FADRx, FE3Ri, FLVRx, GLYALDtpp, GLYtpp, LDH_D, ME2, UREAtpp
4	-59.0822	EX_succ_e	7.97599	-7.5	0.157559	6	34.9228	-10.4813	-2.79929	27.7291	9.99301	b3844, b3236, b0010, b4115, b3927, b1380	ACt2rpp, ARGAGMt7pp, FADRx, FE3Ri, FLVRx, GLYALDtpp, GLYtpp, LDH_D, MDH, UREAtpp
5	-59.0753	EX_succ_e	7.97592	-7.5	0.157608	5	34.9135	-10.6764	-2.79988	27.7222	9.99124	b3844, b4117, b2903, b0010, b1380	ACt2rpp, ARGDC, FADRx, FE3Ri, FLVRx, GLYCL, LDH_D
6	-59.0753	EX_succ_e	7.97592	-7.5	0.157608	5	34.9135	-10.6764	-2.79988	27.7222	9.99124	b3844, b4117, b2905, b0010, b1380	ACt2rpp, ARGDC, FADRx, FE3Ri, FLVRx, GLYCL, LDH_D
7	-59.0729	EX_succ_e	7.97592	-7.5	0.157608	6	34.9135	-10.4813	-2.79988	27.7222	9.99124	b3844, b2463, b4117, b2903, b0010, b1380	ACt2rpp, ARGDC, FADRx, FE3Ri, FLVRx, GLYCL, LDH_D, ME2
8	-59.0624	EX_succ_e	7.97599	-7.5	0.157559	6	34.9228	-10.5208	-2.79929	27.7291	9.99301	b3844, b0010, b4115, b1492, b3927, b1380	ACt2rpp, ARGAGMt7pp, FADRx, FE3Ri, FLVRx, GLUABUTt7pp, GLYALDtpp, GLYtpp, LDH_D, UREAtpp
9	-59.057	EX_succ_e	7.97606	-7.5	0.157508	6	34.9952	-10.6764	-2.79256	27.7792	10.0085	b3771, b3844, b4117, b0010, b3927, b1380	ACt2rpp, ARGDC, DHAD1, DHAD2, FADRx, FE3Ri, FLVRx, GLYALDtpp, GLYtpp, LDH_D, UREAtpp
10	-59.052	EX_succ_e	7.97975	-7.5	0.154876	5	34.8901	-10.6764	-2.80011	27.7227	9.96752	b4117, b2903, b0010, b0452, b1380	ACt2rpp, ARGDC, FACOAE100, FACOAE120, FACOAE140, FACOAE141, FACOAE160, FACOAE161, FACOAE180, FACOAE181, FACOAE60, FACOAE80, GLYCL, LDH_D
11	-59.0477	EX_succ_e	7.976	-7.5	0.157557	6	34.9859	-10.6764	-2.79314	27.7723	10.0067	b3771, b3844, b4117, b2903, b0010, b1380	ACt2rpp, ARGDC, DHAD1, DHAD2, FADRx, FE3Ri, FLVRx, GLYCL, LDH_D
12	-59.0477	EX_succ_e	7.976	-7.5	0.157557	6	34.9859	-10.6764	-2.79314	27.7723	10.0067	b3844, b4117, b3774, b2903, b0010, b1380	ACt2rpp, ARGDC, FADRx, FE3Ri, FLVRx, GLYCL, KARA1, KARA2, LDH_D
13	-59.0048	EX_succ_e	7.97595	-7.5	0.157587	6	34.943	-10.6764	-2.79714	27.7426	9.99754	b3770, b3844, b4117, b2903, b0010, b1380	ACt2rpp, ARGDC, FADRx, FE3Ri, FLVRx, GLYCL, ILETA, LDH_D, VALTA
14	-58.9981	EX_succ_e	7.97693	-7.5	0.156892	6	34.9363	-10.6764	-2.79783	27.7426	9.99147	b3844, b2500, b0010, b4115, b3927, b1380	ACt2rpp, ARGAGMt7pp, FADRx, FE3Ri, FLVRx, GARFT, GLYALDtpp, GLYtpp, LDH_D, UREAtpp
15	-58.9864	EX_succ_e	7.97599	-7.5	0.157559	6	34.9228	-10.6727	-2.79929	27.7291	9.99301	b3844, b4117, b0010, b4132, b3927, b1380	ACt2rpp, ARGDC, CADVtpp, FADRx, FE3Ri, FLVRx, GLYALDtpp, GLYtpp, LDH_D, UREAtpp
16	-58.9864	EX_succ_e	7.97599	-7.5	0.157559	6	34.9228	-10.6727	-2.79929	27.7291	9.99301	b3844, b0010, b4115, b4132, b3927, b1380	ACt2rpp, ARGAGMt7pp, CADVtpp, FADRx, FE3Ri, FLVRx, GLYALDtpp, GLYtpp, LDH_D, UREAtpp
17	-58.985	EX_succ_e	7.97664	-7.5	0.157096	6	34.9188	-10.6676	-2.79933	27.7292	9.98899	b3844, b0010, b4115, b2957, b3927, b1380	ACt2rpp, ARGAGMt7pp, ASNNpp, FADRx, FE3Ri, FLVRx, GLUNpp, GLYALDtpp, GLYtpp, LDH_D, UREAtpp
18	-58.985	EX_succ_e	7.97664	-7.5	0.157096	6	34.9188	-10.6676	-2.79933	27.7292	9.98899	b3844, b4117, b0010, b2957, b3927, b1380	ACt2rpp, ARGDC, ASNNpp, FADRx, FE3Ri, FLVRx, GLUNpp, GLYALDtpp, GLYtpp, LDH_D, UREAtpp
19	-58.9847	EX_succ_e	7.97599	-7.5	0.157559	6	34.9228	-10.6763	-2.79929	27.7291	9.99301	b3844, b1602, b0010, b4115, b3927, b1380	ACt2rpp, ARGAGMt7pp, FADRx, FE3Ri, FLVRx, GLYALDtpp, GLYtpp, LDH_D, THD2pp, UREAtpp
20	-58.9846	EX_succ_e	7.97599	-7.5	0.157559	6	34.9228	-10.6764	-2.79929	27.7291	9.99301	b3844, b0010, b4115, b4094, b3927, b1380	ACt2rpp, ARGAGMt7pp, FADRx, FE3Ri, FLVRx, GLYALDtpp, GLYtpp, LDH_D, R15BPK, UREAtpp
21	-58.9846	EX_succ_e	7.97599	-7.5	0.157559	6	34.9228	-10.6764	-2.79929	27.7291	9.99301	b3844, b4117, b0010, b4123, b3927, b1380	ACt2rpp, ARGDC, FADRx, FE3Ri, FLVRx, GLYALDtpp, GLYtpp, LDH_D, SUCTARTtpp, TARTt2_3pp, UREAtpp
22	-58.9846	EX_succ_e	7.97599	-7.5	0.157559	6	34.9228	-10.6764	-2.79929	27.7291	9.99301	b3844, b4117, b0010, b2131, b3927, b1380	ACt2rpp, ARGDC, CHLabcpp, FADRx, FE3Ri, FLVRx, GLYALDtpp, GLYtpp, LDH_D, UREAtpp
23	-58.9846	EX_succ_e	7.97599	-7.5	0.157559	6	34.9228	-10.6764	-2.79929	27.7291	9.99301	b3844, b0010, b4115, b2130, b3927, b1380	ACt2rpp, ARGAGMt7pp, CHLabcpp, FADRx, FE3Ri, FLVRx, GLYALDtpp, GLYtpp, LDH_D, UREAtpp
24	-58.9846	EX_succ_e	7.97599	-7.5	0.157559	6	34.9228	-10.6764	-2.79929	27.7291	9.99301	b3844, b4117, b0010, b2130, b3927, b1380	ACt2rpp, ARGDC, CHLabcpp, FADRx, FE3Ri, FLVRx, GLYALDtpp, GLYtpp, LDH_D, UREAtpp
25	-58.9846	EX_succ_e	7.97599	-7.5	0.157559	6	34.9228	-10.6764	-2.79929	27.7291	9.99301	b3844, b4117, b0010, b2128, b3927, b1380	ACt2rpp, ARGDC, CHLabcpp, FADRx, FE3Ri, FLVRx, GLYALDtpp, GLYtpp, LDH_D, UREAtpp
26	-58.9846	EX_succ_e	7.97599	-7.5	0.157559	6	34.9228	-10.6764	-2.79929	27.7291	9.99301	b3844, b4117, b0596, b0010, b3927, b1380	ACt2rpp, ARGDC, DHBD, FADRx, FE3Ri, FLVRx, GLYALDtpp, GLYtpp, LDH_D, UREAtpp
27	-58.9846	EX_succ_e	7.97599	-7.5	0.157559	6	34.9228	-10.6764	-2.79929	27.7291	9.99301	b3844, b0010, b4115, b3927, b1380, b0494	ACt2rpp, ARGAGMt7pp, FADRx, FE3Ri, FLVRx, GLYALDtpp, GLYtpp, LDH_D, LPLIPAL1A120pp, LPLIPAL1A140pp, LPLIPAL1A141pp, LPLIPAL1A160pp, LPLIPAL1A161pp, LPLIPAL1A180pp, LPLIPAL1A181pp, LPLIPAL1E120pp, LPLIPAL1E140pp, LPLIPAL1E141pp, LPLIPAL1E160pp, LPLIPAL1E161pp, LPLIPAL1E180pp, LPLIPAL1E181pp, LPLIPAL1G120pp, LPLIPAL1G140pp, LPLIPAL1G141pp, LPLIPAL1G160pp, LPLIPAL1G161pp, LPLIPAL1G180pp, LPLIPAL1G18…
28	-58.9846	EX_succ_e	7.97599	-7.5	0.157559	6	34.9228	-10.6764	-2.79929	27.7291	9.99301	b0072, b3844, b4117, b0010, b3927, b1380	ACt2rpp, ARGDC, FADRx, FE3Ri, FLVRx, GLYALDtpp, GLYtpp, IPPMIa, IPPMIb, LDH_D, UREAtpp
29	-58.9846	EX_succ_e	7.97599	-7.5	0.157559	6	34.9228	-10.6764	-2.79929	27.7291	9.99301	b3844, b4117, b0010, b3927, b1380, b3431	ACt2rpp, ARGDC, FADRx, FE3Ri, FLVRx, GLDBRAN2, GLYALDtpp, GLYtpp, LDH_D, UREAtpp
30	-58.9846	EX_succ_e	7.97599	-7.5	0.157559	6	34.9228	-10.6764	-2.79929	27.7291	9.99301	b3844, b0010, b4115, b3927, b1380, b4321	ACt2rpp, ARGAGMt7pp, FADRx, FE3Ri, FLVRx, FRUURt2rpp, GLYALDtpp, GLYtpp, LDH_D, UREAtpp
31	-58.9846	EX_succ_e	7.97599	-7.5	0.157559	6	34.9228	-10.6764	-2.79929	27.7291	9.99301	b3844, b0010, b4115, b3927, b1380, b0829	ACt2rpp, ARGAGMt7pp, FADRx, FE3Ri, FLVRx, GLYALDtpp, GLYtpp, GTHRDabcpp, LDH_D, UREAtpp
32	-58.9846	EX_succ_e	7.97599	-7.5	0.157559	6	34.9228	-10.6764	-2.79929	27.7291	9.99301	b3844, b0010, b4115, b3927, b1380, b0831	ACt2rpp, ARGAGMt7pp, FADRx, FE3Ri, FLVRx, GLYALDtpp, GLYtpp, GTHRDabcpp, LDH_D, UREAtpp
33	-58.9846	EX_succ_e	7.97599	-7.5	0.157559	6	34.9228	-10.6764	-2.79929	27.7291	9.99301	b3844, b4117, b0010, b3927, b1380, b0829	ACt2rpp, ARGDC, FADRx, FE3Ri, FLVRx, GLYALDtpp, GLYtpp, GTHRDabcpp, LDH_D, UREAtpp
34	-58.9846	EX_succ_e	7.97599	-7.5	0.157559	6	34.9228	-10.6764	-2.79929	27.7291	9.99301	b3844, b4117, b0010, b3927, b1380, b0831	ACt2rpp, ARGDC, FADRx, FE3Ri, FLVRx, GLYALDtpp, GLYtpp, GTHRDabcpp, LDH_D, UREAtpp
35	-58.9846	EX_succ_e	7.97599	-7.5	0.157559	6	34.9228	-10.6764	-2.79929	27.7291	9.99301	b3844, b4117, b0010, b3927, b1380, b0832	ACt2rpp, ARGDC, FADRx, FE3Ri, FLVRx, GLYALDtpp, GLYtpp, GTHRDabcpp, LDH_D, UREAtpp
36	-58.9846	EX_succ_e	7.97599	-7.5	0.157559	6	34.9228	-10.6764	-2.79929	27.7291	9.99301	b3115, b3844, b4117, b0010, b3927, b1380	ACt2rpp, ARGDC, FADRx, FE3Ri, FLVRx, GLYALDtpp, GLYtpp, LDH_D, PPAKr, UREAtpp
37	-58.9846	EX_succ_e	7.97599	-7.5	0.157559	6	34.9228	-10.6764	-2.79929	27.7291	9.99301	b3844, b4117, b0010, b3927, b1380, b0325	ACt2rpp, ARGDC, FADRx, FE3Ri, FLVRx, GLYALDtpp, GLYtpp, LCARSyi, LDH_D, PPDOy, UREAtpp
38	-58.9846	EX_succ_e	7.97599	-7.5	0.157559	6	34.9228	-10.6764	-2.79929	27.7291	9.99301	b3844, b0010, b4115, b3927, b2835, b1380	2AGPA120tipp, 2AGPA140tipp, 2AGPA141tipp, 2AGPA160tipp, 2AGPA161tipp, 2AGPA180tipp, 2AGPA181tipp, 2AGPE120tipp, 2AGPE140tipp, 2AGPE141tipp, 2AGPE160tipp, 2AGPE161tipp, 2AGPE180tipp, 2AGPE181tipp, 2AGPG120tipp, 2AGPG140tipp, 2AGPG141tipp, 2AGPG160tipp, 2AGPG161tipp, 2AGPG180tipp, 2AGPG181tipp, ACt2rpp, ARGAGMt7pp, FADRx, FE3Ri, FLVRx, GLYALDtpp, GLYtpp, LDH_D, UREAtpp
39	-58.9846	EX_succ_e	7.97599	-7.5	0.157559	6	34.9228	-10.6764	-2.79929	27.7291	9.99301	b1278, b3844, b4117, b0010, b3927, b1380	ACt2rpp, ARGDC, FADRx, FE3Ri, FLVRx, GLYALDtpp, GLYtpp, LDH_D, PAPA120, PAPA120pp, PAPA140, PAPA140pp, PAPA141, PAPA141pp, PAPA160, PAPA160pp, PAPA161, PAPA161pp, PAPA180, PAPA180pp, PAPA181, PAPA181pp, UREAtpp
40	-58.9846	EX_succ_e	7.97599	-7.5	0.157559	6	34.9228	-10.6764	-2.79929	27.7291	9.99301	b3844, b4117, b0261, b0010, b3927, b1380	ACt2rpp, ARGDC, FADRx, FE3Ri, FLVRx, GLYALDtpp, GLYtpp, HCYSMT, HCYSMT2, LDH_D, UREAtpp
41	-58.9846	EX_succ_e	7.97599	-7.5	0.157559	6	34.9228	-10.6764	-2.79929	27.7291	9.99301	b3844, b1744, b0010, b4115, b3927, b1380	ACt2rpp, ARGAGMt7pp, FADRx, FE3Ri, FLVRx, GLYALDtpp, GLYtpp, LDH_D, SGDS, UREAtpp
42	-58.9846	EX_succ_e	7.97599	-7.5	0.157559	6	34.9228	-10.6764	-2.79929	27.7291	9.99301	b3844, b1747, b0010, b4115, b3927, b1380	ACt2rpp, ARGAGMt7pp, AST, FADRx, FE3Ri, FLVRx, GLYALDtpp, GLYtpp, LDH_D, UREAtpp
43	-58.9846	EX_succ_e	7.97599	-7.5	0.157559	6	34.9228	-10.6764	-2.79929	27.7291	9.99301	b3844, b0010, b4115, b1745, b3927, b1380	ACt2rpp, ARGAGMt7pp, FADRx, FE3Ri, FLVRx, GLYALDtpp, GLYtpp, LDH_D, SADH, UREAtpp
44	-58.9846	EX_succ_e	7.97599	-7.5	0.157559	6	34.9228	-10.6764	-2.79929	27.7291	9.99301	b3844, b1747, b4117, b0010, b3927, b1380	ACt2rpp, ARGDC, AST, FADRx, FE3Ri, FLVRx, GLYALDtpp, GLYtpp, LDH_D, UREAtpp
45	-58.9846	EX_succ_e	7.97599	-7.5	0.157559	6	34.9228	-10.6764	-2.79929	27.7291	9.99301	b3844, b0010, b4115, b3409, b3927, b1380	ACt2rpp, ARGAGMt7pp, FADRx, FE2abcpp, FE3Ri, FLVRx, GLYALDtpp, GLYtpp, LDH_D, UREAtpp
46	-58.9846	EX_succ_e	7.97599	-7.5	0.157559	6	34.9228	-10.6764	-2.79929	27.7291	9.99301	b3844, b4117, b0010, b3409, b3927, b1380	ACt2rpp, ARGDC, FADRx, FE2abcpp, FE3Ri, FLVRx, GLYALDtpp, GLYtpp, LDH_D, UREAtpp
47	-58.9846	EX_succ_e	7.97599	-7.5	0.157559	6	34.9228	-10.6764	-2.79929	27.7291	9.99301	b3844, b1768, b0010, b4115, b3927, b1380	ACt2rpp, ARGAGMt7pp, FADRx, FE3Ri, FLVRx, GLYALDtpp, GLYtpp, LDH_D, NNAM, UREAtpp
48	-58.9846	EX_succ_e	7.97599	-7.5	0.157559	6	34.9228	-10.6764	-2.79929	27.7291	9.99301	b3844, b4117, b1768, b0010, b3927, b1380	ACt2rpp, ARGDC, FADRx, FE3Ri, FLVRx, GLYALDtpp, GLYtpp, LDH_D, NNAM, UREAtpp
49	-58.9846	EX_succ_e	7.97599	-7.5	0.157559	6	34.9228	-10.6764	-2.79929	27.7291	9.99301	b3844, b0010, b4115, b3927, b1380, b1985	ACt2rpp, ARGAGMt7pp, FADRx, FADt, FE3Ri, FLVRx, FMNt, GLYALDtpp, GLYtpp, LDH_D, UREAtpp
50	-58.9846	EX_succ_e	7.97599	-7.5	0.157559	6	34.9228	-10.6764	-2.79929	27.7291	9.99301	b0871, b3844, b4117, b0010, b3927, b1380	ACt2rpp, ARGDC, FADRx, FE3Ri, FLVRx, GLYALDtpp, GLYtpp, LDH_D, POX, UREAtpp
51	-58.9846	EX_succ_e	7.97599	-7.5	0.157559	6	34.9228	-10.6764	-2.79929	27.7291	9.99301	b3844, b4117, b0010, b3909, b3927, b1380	ACt2rpp, ARGDC, DDGLCNt2rpp, FADRx, FE3Ri, FLVRx, GLYALDtpp, GLYtpp, LDH_D, UREAtpp
52	-58.9846	EX_succ_e	7.97599	-7.5	0.157559	6	34.9228	-10.6764	-2.79929	27.7291	9.99301	b3844, b4117, b0010, b3927, b3029, b1380	ACt2rpp, ARGDC, FADRx, FE3Ri, FLVRx, GLYALDtpp, GLYtpp, LDH_D, QMO2, QMO3, UREAtpp
53	-58.9846	EX_succ_e	7.97599	-7.5	0.157559	6	34.9228	-10.6764	-2.79929	27.7291	9.99301	b4467, b3844, b4117, b0010, b3927, b1380	ACt2rpp, ARGDC, FADRx, FE3Ri, FLVRx, GLYALDtpp, GLYCTO2, GLYCTO3, GLYCTO4, GLYtpp, LDH_D, UREAtpp
54	-58.9846	EX_succ_e	7.97599	-7.5	0.157559	6	34.9228	-10.6764	-2.79929	27.7291	9.99301	b2979, b3844, b0010, b4115, b3927, b1380	ACt2rpp, ARGAGMt7pp, FADRx, FE3Ri, FLVRx, GLYALDtpp, GLYCTO2, GLYCTO3, GLYCTO4, GLYtpp, LDH_D, UREAtpp
55	-58.9846	EX_succ_e	7.97599	-7.5	0.157559	6	34.9228	-10.6764	-2.79929	27.7291	9.99301	b3844, b0010, b4115, b0433, b3927, b1380	ACt2rpp, AGM3Pt2pp, AGM4Pt2pp, AGMt2pp, ARGAGMt7pp, FADRx, FE3Ri, FLVRx, GLYALDtpp, GLYtpp, LDH_D, UREAtpp
56	-58.9846	EX_succ_e	7.97599	-7.5	0.157559	6	34.9228	-10.6764	-2.79929	27.7291	9.99301	b3844, b4117, b0010, b1107, b3927, b1380	ACt2rpp, AGM3PH, AGM4PH, AGMH, ARGDC, FADRx, FE3Ri, FLVRx, GLYALDtpp, GLYtpp, LDH_D, UREAtpp
57	-58.9846	EX_succ_e	7.97599	-7.5	0.157559	6	34.9228	-10.6764	-2.79929	27.7291	9.99301	b3844, b4117, b0010, b1119, b3927, b1380	ACGAMK, ACt2rpp, ARGDC, FADRx, FE3Ri, FLVRx, GLYALDtpp, GLYtpp, LDH_D, UREAtpp
58	-58.9846	EX_succ_e	7.97599	-7.5	0.157559	6	34.9228	-10.6764	-2.79929	27.7291	9.99301	b3844, b4117, b0010, b3927, b1380, b1681	ACt2rpp, ARGDC, FADRx, FE3Ri, FLVRx, GLYALDtpp, GLYtpp, LDH_D, S2FE2SR, S2FE2SS, S2FE2SS2, S2FE2ST, S4FE4SR, S4FE4ST, UREAtpp
59	-58.9846	EX_succ_e	7.97599	-7.5	0.157559	6	34.9228	-10.6764	-2.79929	27.7291	9.99301	b3844, b0010, b4115, b3927, b1380, b1683	ACt2rpp, ARGAGMt7pp, FADRx, FE3Ri, FLVRx, GLYALDtpp, GLYtpp, LDH_D, S2FE2SR, S2FE2SS, S2FE2SS2, S2FE2ST, S4FE4SR, S4FE4ST, UREAtpp
60	-58.9846	EX_succ_e	7.97599	-7.5	0.157559	6	34.9228	-10.6764	-2.79929	27.7291	9.99301	b3844, b0010, b4115, b3927, b1380, b1684	ACt2rpp, ARGAGMt7pp, FADRx, FE3Ri, FLVRx, GLYALDtpp, GLYtpp, LDH_D, S2FE2ST, S4FE4ST, UREAtpp
61	-58.9846	EX_succ_e	7.97599	-7.5	0.157559	6	34.9228	-10.6764	-2.79929	27.7291	9.99301	b3844, b4117, b0010, b3927, b1380, b1682	ACt2rpp, ARGDC, FADRx, FE3Ri, FLVRx, GLYALDtpp, GLYtpp, LDH_D, S2FE2SR, S2FE2SS, S2FE2SS2, S2FE2ST, S4FE4SR, S4FE4ST, UREAtpp
62	-58.9846	EX_succ_e	7.97599	-7.5	0.157559	6	34.9228	-10.6764	-2.79929	27.7291	9.99301	b3844, b4117, b3526, b0010, b3927, b1380	ACt2rpp, ARGDC, DDGLK, FADRx, FE3Ri, FLVRx, GLYALDtpp, GLYtpp, LDH_D, UREAtpp
63	-58.9846	EX_succ_e	7.97599	-7.5	0.157559	6	34.9228	-10.6764	-2.79929	27.7291	9.99301	b3916, b3844, b4117, b0010, b3927, b1380	ACt2rpp, ARGDC, FADRx, FE3Ri, FLVRx, GLYALDtpp, GLYtpp, LDH_D, PFK_2, PFK_3, UREAtpp
64	-58.9846	EX_succ_e	7.97599	-7.5	0.157559	6	34.9228	-10.6764	-2.79929	27.7291	9.99301	b3844, b4117, b0010, b0040, b3927, b1380	ACt2rpp, ARGDC, CRNt7pp, CRNt8pp, FADRx, FE3Ri, FLVRx, GLYALDtpp, GLYtpp, LDH_D, UREAtpp
65	-58.9846	EX_succ_e	7.97599	-7.5	0.157559	6	34.9228	-10.6764	-2.79929	27.7291	9.99301	b3844, b4117, b2261, b0010, b3927, b1380	ACt2rpp, ARGDC, FADRx, FE3Ri, FLVRx, GLYALDtpp, GLYtpp, LDH_D, SUCBZS, UREAtpp
66	-58.9846	EX_succ_e	7.97599	-7.5	0.157559	6	34.9228	-10.6764	-2.79929	27.7291	9.99301	b3844, b4117, b0010, b3927, b1380, b3930	ACt2rpp, ARGDC, DHNAOT4, FADRx, FE3Ri, FLVRx, GLYALDtpp, GLYtpp, LDH_D, UREAtpp
67	-58.9846	EX_succ_e	7.97599	-7.5	0.157559	6	34.9228	-10.6764	-2.79929	27.7291	9.99301	b3844, b0010, b4115, b3927, b1380, b1686	ACt2rpp, ARGAGMt7pp, DHNCOAT, FADRx, FE3Ri, FLVRx, GLYALDtpp, GLYtpp, LDH_D, UREAtpp
68	-58.9846	EX_succ_e	7.97599	-7.5	0.157559	6	34.9228	-10.6764	-2.79929	27.7291	9.99301	b3844, b0010, b4115, b3927, b1380, b2262	ACt2rpp, ARGAGMt7pp, DHNCOAS, FADRx, FE3Ri, FLVRx, GLYALDtpp, GLYtpp, LDH_D, UREAtpp
69	-58.9846	EX_succ_e	7.97599	-7.5	0.157559	6	34.9228	-10.6764	-2.79929	27.7291	9.99301	b3844, b4117, b0010, b3927, b1380, b2264	ACt2rpp, ARGDC, FADRx, FE3Ri, FLVRx, GLYALDtpp, GLYtpp, LDH_D, SEPHCHCS, UREAtpp
70	-58.9846	EX_succ_e	7.97599	-7.5	0.157559	6	34.9228	-10.6764	-2.79929	27.7291	9.99301	b3844, b2261, b0010, b4115, b3927, b1380	ACt2rpp, ARGAGMt7pp, FADRx, FE3Ri, FLVRx, GLYALDtpp, GLYtpp, LDH_D, SUCBZS, UREAtpp
71	-58.9846	EX_succ_e	7.97599	-7.5	0.157559	6	34.9228	-10.6764	-2.79929	27.7291	9.99301	b3844, b0010, b4115, b3927, b1380, b3930	ACt2rpp, ARGAGMt7pp, DHNAOT4, FADRx, FE3Ri, FLVRx, GLYALDtpp, GLYtpp, LDH_D, UREAtpp
72	-58.9846	EX_succ_e	7.97599	-7.5	0.157559	6	34.9228	-10.6764	-2.79929	27.7291	9.99301	b3844, b4117, b0505, b0010, b3927, b1380	ACt2rpp, ARGDC, FADRx, FE3Ri, FLVRx, GLYALDtpp, GLYtpp, LDH_D, UGLYCH, UREAtpp
73	-58.9846	EX_succ_e	7.97599	-7.5	0.157559	6	34.9228	-10.6764	-2.79929	27.7291	9.99301	b3844, b4117, b0010, b3089, b3927, b1380	ACt2rpp, ARGDC, FADRx, FE3Ri, FLVRx, GLYALDtpp, GLYtpp, LDH_D, SERt4pp, THRt4pp, UREAtpp
74	-58.9846	EX_succ_e	7.97599	-7.5	0.157559	6	34.9228	-10.6764	-2.79929	27.7291	9.99301	b3844, b4117, b0937, b0010, b3927, b1380	ACt2rpp, ARGDC, FADRx, FE3Ri, FLVRx, FMNRx, GLYALDtpp, GLYtpp, LDH_D, UREAtpp
75	-58.9846	EX_succ_e	7.97599	-7.5	0.157559	6	34.9228	-10.6764	-2.79929	27.7291	9.99301	b3844, b0010, b4115, b3927, b1380, b3541	ACt2rpp, ARGAGMt7pp, CGLYabcpp, FADRx, FE3Ri, FLVRx, GLYALDtpp, GLYtpp, LDH_D, PROGLYabcpp, UREAtpp
76	-58.9846	EX_succ_e	7.97599	-7.5	0.157559	6	34.9228	-10.6764	-2.79929	27.7291	9.99301	b3844, b4117, b0010, b3927, b1380, b3543	ACt2rpp, ARGDC, CGLYabcpp, FADRx, FE3Ri, FLVRx, GLYALDtpp, GLYtpp, LDH_D, PROGLYabcpp, UREAtpp
77	-58.9846	EX_succ_e	7.97599	-7.5	0.157559	6	34.9228	-10.6764	-2.79929	27.7291	9.99301	b3844, b4117, b0010, b3927, b1380, b3541	ACt2rpp, ARGDC, CGLYabcpp, FADRx, FE3Ri, FLVRx, GLYALDtpp, GLYtpp, LDH_D, PROGLYabcpp, UREAtpp
78	-58.9846	EX_succ_e	7.97599	-7.5	0.157559	6	34.9228	-10.6764	-2.79929	27.7291	9.99301	b3844, b4117, b0010, b3927, b1380, b3540	ACt2rpp, ARGDC, CGLYabcpp, FADRx, FE3Ri, FLVRx, GLYALDtpp, GLYtpp, LDH_D, PROGLYabcpp, UREAtpp
79	-58.9846	EX_succ_e	7.97599	-7.5	0.157559	6	34.9228	-10.6764	-2.79929	27.7291	9.99301	b3844, b4117, b0010, b1192, b3927, b1380	4PCP, ACt2rpp, AGM4PCP, AM4PCP, ARGDC, FADRx, FE3Ri, FLVRx, GLYALDtpp, GLYtpp, LDH_D, UM4PCP, UREAtpp
80	-58.9846	EX_succ_e	7.97599	-7.5	0.157559	6	34.9228	-10.6764	-2.79929	27.7291	9.99301	b3844, b4117, b2920, b0010, b3927, b1380	ACt2rpp, ARGDC, FADRx, FE3Ri, FLVRx, GLYALDtpp, GLYtpp, LDH_D, PPCSCT, UREAtpp
81	-58.9846	EX_succ_e	7.97599	-7.5	0.157559	6	34.9228	-10.6764	-2.79929	27.7291	9.99301	b3844, b2920, b0010, b4115, b3927, b1380	ACt2rpp, ARGAGMt7pp, FADRx, FE3Ri, FLVRx, GLYALDtpp, GLYtpp, LDH_D, PPCSCT, UREAtpp
82	-58.9846	EX_succ_e	7.97599	-7.5	0.157559	6	34.9228	-10.6764	-2.79929	27.7291	9.99301	b3844, b4117, b0010, b2308, b3927, b1380	ACt2rpp, ARGDC, FADRx, FE3Ri, FLVRx, GLYALDtpp, GLYtpp, HISabcpp, LDH_D, LYSabcpp, ORNabcpp, UREAtpp
83	-58.9846	EX_succ_e	7.97599	-7.5	0.157559	6	34.9228	-10.6764	-2.79929	27.7291	9.99301	b3752, b3844, b4117, b0010, b3927, b1380	ACt2rpp, ARGDC, FADRx, FE3Ri, FLVRx, GLYALDtpp, GLYtpp, LDH_D, RBK, UREAtpp
84	-58.9846	EX_succ_e	7.97599	-7.5	0.157559	6	34.9228	-10.6764	-2.79929	27.7291	9.99301	b3844, b0121, b0010, b4115, b3927, b1380	ACt2rpp, APCS, ARGAGMt7pp, FADRx, FE3Ri, FLVRx, GLYALDtpp, GLYtpp, LDH_D, SPMS, UREAtpp
85	-58.9846	EX_succ_e	7.97599	-7.5	0.157559	6	34.9228	-10.6764	-2.79929	27.7291	9.99301	b3844, b0120, b4117, b0010, b3927, b1380	ACt2rpp, ADMDC, ARGDC, FADRx, FE3Ri, FLVRx, GLYALDtpp, GLYtpp, LDH_D, UREAtpp
86	-58.9846	EX_succ_e	7.97599	-7.5	0.157559	6	34.9228	-10.6764	-2.79929	27.7291	9.99301	b3844, b4117, b0010, b2239, b3927, b1380	ACt2rpp, ARGDC, FADRx, FE3Ri, FLVRx, GLYALDtpp, GLYtpp, GPDDA1pp, GPDDA2pp, GPDDA3pp, GPDDA4pp, GPDDA5pp, LDH_D, UREAtpp
87	-58.9846	EX_succ_e	7.97599	-7.5	0.157559	6	34.9228	-10.6764	-2.79929	27.7291	9.99301	b3844, b0010, b4115, b3927, b1380, b4209	ACt2rpp, ARGAGMt7pp, FADRx, FE3Ri, FESR, FLVRx, GLYALDtpp, GLYtpp, LDH_D, UREAtpp
88	-58.9846	EX_succ_e	7.97599	-7.5	0.157559	6	34.9228	-10.6764	-2.79929	27.7291	9.99301	b3844, b0010, b4115, b3927, b1380, b2309	ACt2rpp, ARGAGMt7pp, FADRx, FE3Ri, FLVRx, GLYALDtpp, GLYtpp, HISabcpp, LDH_D, UREAtpp
89	-58.9846	EX_succ_e	7.97599	-7.5	0.157559	6	34.9228	-10.6764	-2.79929	27.7291	9.99301	b3844, b4117, b0010, b3927, b1380, b2309	ACt2rpp, ARGDC, FADRx, FE3Ri, FLVRx, GLYALDtpp, GLYtpp, HISabcpp, LDH_D, UREAtpp
90	-58.9846	EX_succ_e	7.97599	-7.5	0.157559	6	34.9228	-10.6764	-2.79929	27.7291	9.99301	b3844, b4117, b3806, b0010, b3927, b1380	ACt2rpp, ADNCYC, ARGDC, FADRx, FE3Ri, FLVRx, GLYALDtpp, GLYtpp, LDH_D, UREAtpp
91	-58.9846	EX_succ_e	7.97599	-7.5	0.157559	6	34.9228	-10.6764	-2.79929	27.7291	9.99301	b3844, b4117, b0010, b3927, b1380, b0594	ACt2rpp, ARGDC, DHBS, FADRx, FE3Ri, FLVRx, GLYALDtpp, GLYtpp, LDH_D, UREAtpp
92	-58.9846	EX_succ_e	7.97599	-7.5	0.157559	6	34.9228	-10.6764	-2.79929	27.7291	9.99301	b2222, b3844, b4117, b0010, b3927, b1380	ACt2rpp, ARGDC, BUTCT, FADRx, FE3Ri, FLVRx, GLYALDtpp, GLYtpp, HXCT, LDH_D, UREAtpp
93	-58.9846	EX_succ_e	7.97599	-7.5	0.157559	6	34.9228	-10.6764	-2.79929	27.7291	9.99301	b3844, b4117, b3956, b0010, b3927, b1380	ACt2rpp, ARGDC, FADRx, FE3Ri, FLVRx, GLYALDtpp, GLYtpp, LDH_D, PPC, UREAtpp
94	-58.9846	EX_succ_e	7.97599	-7.5	0.157559	6	34.9228	-10.6764	-2.79929	27.7291	9.99301	b3617, b3844, b4117, b0010, b3927, b1380	ACt2rpp, ARGDC, FADRx, FE3Ri, FLVRx, GLYALDtpp, GLYAT, GLYtpp, LDH_D, UREAtpp
95	-58.9846	EX_succ_e	7.97599	-7.5	0.157559	6	34.9228	-10.6764	-2.79929	27.7291	9.99301	b3844, b0010, b4115, b3927, b1380, b4238	ACt2rpp, ARGAGMt7pp, FADRx, FE3Ri, FLVRx, GLYALDtpp, GLYtpp, LDH_D, RNTR1c2, RNTR2c2, RNTR3c2, RNTR4c2, UREAtpp
96	-58.9846	EX_succ_e	7.97599	-7.5	0.157559	6	34.9228	-10.6764	-2.79929	27.7291	9.99301	b3844, b4117, b0010, b3927, b1380, b4238	ACt2rpp, ARGDC, FADRx, FE3Ri, FLVRx, GLYALDtpp, GLYtpp, LDH_D, RNTR1c2, RNTR2c2, RNTR3c2, RNTR4c2, UREAtpp
97	-58.9846	EX_succ_e	7.97599	-7.5	0.157559	6	34.9228	-10.6764	-2.79929	27.7291	9.99301	b3844, b4117, b2049, b0010, b3927, b1380	ACt2rpp, ARGDC, FADRx, FE3Ri, FLVRx, GLYALDtpp, GLYtpp, LDH_D, MAN1PT2, UREAtpp
98	-58.9846	EX_succ_e	7.97599	-7.5	0.157559	6	34.9228	-10.6764	-2.79929	27.7291	9.99301	b3844, b4117, b0507, b0010, b3927, b1380	ACt2rpp, ARGDC, FADRx, FE3Ri, FLVRx, GLXCL, GLYALDtpp, GLYtpp, LDH_D, UREAtpp
99	-58.9846	EX_succ_e	7.97599	-7.5	0.157559	6	34.9228	-10.6764	-2.79929	27.7291	9.99301	b3844, b4117, b0010, b3927, b1380, b4208	ACt2rpp, ARGDC, BALAt2pp, DALAt2pp, DSERt2pp, FADRx, FE3Ri, FLVRx, GLYALDtpp, GLYtpp, LDH_D, UREAtpp
100	-58.9846	EX_succ_e	7.97599	-7.5	0.157559	6	34.9228	-10.6764	-2.79929	27.7291	9.99301	b3844, b0758, b0010, b4115, b3927, b1380	ACt2rpp, ARGAGMt7pp, FADRx, FE3Ri, FLVRx, GLYALDtpp, GLYtpp, LDH_D, UGLT, UREAtpp
101	-58.9846	EX_succ_e	7.97599	-7.5	0.157559	6	34.9228	-10.6764	-2.79929	27.7291	9.99301	b3844, b4117, b0759, b0010, b3927, b1380	ACt2rpp, ARGDC, FADRx, FE3Ri, FLVRx, GLYALDtpp, GLYtpp, LDH_D, UDPG4E, UREAtpp
102	-58.9846	EX_succ_e	7.97599	-7.5	0.157559	6	34.9228	-10.6764	-2.79929	27.7291	9.99301	b3844, b0010, b4115, b3927, b1380, b2906	ACt2rpp, ARGAGMt7pp, FADRx, FE3Ri, FLVRx, GLYALDtpp, GLYtpp, LDH_D, OPHHXy, UREAtpp
103	-58.9846	EX_succ_e	7.97599	-7.5	0.157559	6	34.9228	-10.6764	-2.79929	27.7291	9.99301	b3844, b4117, b0010, b3927, b1380, b2906	ACt2rpp, ARGDC, FADRx, FE3Ri, FLVRx, GLYALDtpp, GLYtpp, LDH_D, OPHHXy, UREAtpp
104	-58.9846	EX_succ_e	7.97599	-7.5	0.157559	6	34.9228	-10.6764	-2.79929	27.7291	9.99301	b3844, b4117, b0010, b3927, b1380, b4129	ACt2rpp, AP4AS, ARGDC, FADRx, FE3Ri, FLVRx, GLYALDtpp, GLYtpp, LDH_D, UREAtpp
105	-58.9846	EX_succ_e	7.97599	-7.5	0.157559	6	34.9228	-10.6764	-2.79929	27.7291	9.99301	b3844, b4117, b0010, b3927, b1380, b1090	ACPPAT120, ACPPAT140, ACPPAT141, ACPPAT160, ACPPAT161, ACPPAT180, ACPPAT181, ACt2rpp, ARGDC, FADRx, FE3Ri, FLVRx, GLYALDtpp, GLYtpp, LDH_D, UREAtpp
106	-58.9846	EX_succ_e	7.97599	-7.5	0.157559	6	34.9228	-10.6764	-2.79929	27.7291	9.99301	b3844, b4117, b0010, b0590, b3927, b1380	ACt2rpp, ARGDC, DHBSZ3FEabcpp, FADRx, FE3Ri, FEENTERabcpp, FLVRx, GLYALDtpp, GLYtpp, LDH_D, UREAtpp
107	-58.9846	EX_succ_e	7.97599	-7.5	0.157559	6	34.9228	-10.6764	-2.79929	27.7291	9.99301	b3844, b0010, b0588, b4115, b3927, b1380	ACt2rpp, ARGAGMt7pp, DHBSZ3FEabcpp, FADRx, FE3Ri, FEENTERabcpp, FLVRx, GLYALDtpp, GLYtpp, LDH_D, UREAtpp
108	-58.9846	EX_succ_e	7.97599	-7.5	0.157559	6	34.9228	-10.6764	-2.79929	27.7291	9.99301	b3844, b1651, b0010, b4115, b3927, b1380	ACt2rpp, ARGAGMt7pp, FADRx, FE3Ri, FLVRx, GLYALDtpp, GLYtpp, LDH_D, LGTHL, UREAtpp
109	-58.9846	EX_succ_e	7.97599	-7.5	0.157559	6	34.9228	-10.6764	-2.79929	27.7291	9.99301	b3844, b1199, b0010, b4115, b3927, b1380	ACt2rpp, ARGAGMt7pp, DHAPT, FADRx, FE3Ri, FLVRx, GLYALDtpp, GLYtpp, LDH_D, UREAtpp
110	-58.9846	EX_succ_e	7.97599	-7.5	0.157559	6	34.9228	-10.6764	-2.79929	27.7291	9.99301	b3844, b4117, b1198, b0010, b3927, b1380	ACt2rpp, ARGDC, DHAPT, FADRx, FE3Ri, FLVRx, GLYALDtpp, GLYtpp, LDH_D, UREAtpp
111	-58.9846	EX_succ_e	7.97599	-7.5	0.157559	6	34.9228	-10.6764	-2.79929	27.7291	9.99301	b3844, b1200, b0010, b4115, b3927, b1380	ACt2rpp, ARGAGMt7pp, DHAPT, FADRx, FE3Ri, FLVRx, GLYALDtpp, GLYtpp, LDH_D, UREAtpp
112	-58.9846	EX_succ_e	7.97599	-7.5	0.157559	6	34.9228	-10.6764	-2.79929	27.7291	9.99301	b3844, b2700, b0010, b4115, b3927, b1380	ACt2rpp, ARGAGMt7pp, FADRx, FE3Ri, FLVRx, GLYALDtpp, GLYtpp, LDH_D, NMNDA, UREAtpp
113	-58.9846	EX_succ_e	7.97599	-7.5	0.157559	6	34.9228	-10.6764	-2.79929	27.7291	9.99301	b3844, b4117, b2700, b0010, b3927, b1380	ACt2rpp, ARGDC, FADRx, FE3Ri, FLVRx, GLYALDtpp, GLYtpp, LDH_D, NMNDA, UREAtpp
114	-58.9846	EX_succ_e	7.97599	-7.5	0.157559	6	34.9228	-10.6764	-2.79929	27.7291	9.99301	b3844, b0010, b4115, b1857, b3927, b1380	ACt2rpp, ARGAGMt7pp, FADRx, FE3Ri, FLVRx, GLYALDtpp, GLYtpp, LDH_D, UREAtpp, ZNabcpp
115	-58.9846	EX_succ_e	7.97599	-7.5	0.157559	6	34.9228	-10.6764	-2.79929	27.7291	9.99301	b3844, b4117, b0010, b1858, b3927, b1380	ACt2rpp, ARGDC, FADRx, FE3Ri, FLVRx, GLYALDtpp, GLYtpp, LDH_D, UREAtpp, ZNabcpp
116	-58.9846	EX_succ_e	7.97599	-7.5	0.157559	6	34.9228	-10.6764	-2.79929	27.7291	9.99301	b3831, b3844, b4117, b0010, b3927, b1380	ACt2rpp, ARGDC, FADRx, FE3Ri, FLVRx, GLYALDtpp, GLYtpp, LDH_D, PYNP2r, UREAtpp
117	-58.9846	EX_succ_e	7.97599	-7.5	0.157559	6	34.9228	-10.6764	-2.79929	27.7291	9.99301	b3844, b4239, b0010, b4115, b3927, b1380	ACt2rpp, ARGAGMt7pp, FADRx, FE3Ri, FLVRx, GLYALDtpp, GLYtpp, LDH_D, TRE6PH, UREAtpp
118	-58.9846	EX_succ_e	7.97599	-7.5	0.157559	6	34.9228	-10.6764	-2.79929	27.7291	9.99301	b1261, b3844, b4117, b0010, b3927, b1380	ACt2rpp, ARGDC, FADRx, FE3Ri, FLVRx, GLYALDtpp, GLYtpp, LDH_D, TRPS1, TRPS2, TRPS3, UREAtpp
119	-58.9846	EX_succ_e	7.97599	-7.5	0.157559	6	34.9228	-10.6764	-2.79929	27.7291	9.99301	b3844, b0010, b4115, b1186, b3927, b1380	ACt2rpp, ARGAGMt7pp, FADRx, FE3Ri, FLVRx, GLYALDtpp, GLYtpp, LDH_D, NAt3_1p5pp, UREAtpp
120	-58.9846	EX_succ_e	7.97599	-7.5	0.157559	6	34.9228	-10.6764	-2.79929	27.7291	9.99301	b3844, b4117, b4139, b0010, b3927, b1380	ACt2rpp, ARGDC, ASPT, FADRx, FE3Ri, FLVRx, GLYALDtpp, GLYtpp, LDH_D, UREAtpp
121	-58.9846	EX_succ_e	7.97599	-7.5	0.157559	6	34.9228	-10.6764	-2.79929	27.7291	9.99301	b2066, b3844, b4117, b0010, b3927, b1380	ACt2rpp, ARGDC, CYTDK1, CYTDK2, FADRx, FE3Ri, FLVRx, GLYALDtpp, GLYtpp, LDH_D, UREAtpp, URIK1, URIK2
122	-58.9846	EX_succ_e	7.97599	-7.5	0.157559	6	34.9228	-10.6764	-2.79929	27.7291	9.99301	b2066, b3844, b0010, b4115, b3927, b1380	ACt2rpp, ARGAGMt7pp, CYTDK1, CYTDK2, FADRx, FE3Ri, FLVRx, GLYALDtpp, GLYtpp, LDH_D, UREAtpp, URIK1, URIK2
123	-58.9846	EX_succ_e	7.97599	-7.5	0.157559	6	34.9228	-10.6764	-2.79929	27.7291	9.99301	b3844, b2784, b4117, b0010, b3927, b1380	ACt2rpp, ARGDC, FADRx, FE3Ri, FLVRx, GLYALDtpp, GLYtpp, GTPDPK, LDH_D, UREAtpp
124	-58.9846	EX_succ_e	7.97599	-7.5	0.157559	6	34.9228	-10.6764	-2.79929	27.7291	9.99301	b3844, b4117, b0010, b2198, b3927, b1380	ACt2rpp, ARGDC, FADRx, FE3Ri, FLVRx, GLYALDtpp, GLYtpp, LDH_D, PHEMEabcpp, UREAtpp
125	-58.9846	EX_succ_e	7.97599	-7.5	0.157559	6	34.9228	-10.6764	-2.79929	27.7291	9.99301	b3844, b0010, b4115, b2197, b3927, b1380	ACt2rpp, ARGAGMt7pp, FADRx, FE3Ri, FLVRx, GLYALDtpp, GLYtpp, LDH_D, PHEMEabcpp, UREAtpp
126	-58.9846	EX_succ_e	7.97599	-7.5	0.157559	6	34.9228	-10.6764	-2.79929	27.7291	9.99301	b3844, b4117, b0010, b2199, b3927, b1380	ACt2rpp, ARGDC, FADRx, FE3Ri, FLVRx, GLYALDtpp, GLYtpp, LDH_D, PHEMEabcpp, UREAtpp
127	-58.9846	EX_succ_e	7.97599	-7.5	0.157559	6	34.9228	-10.6764	-2.79929	27.7291	9.99301	b3844, b0010, b4115, b2198, b3927, b1380	ACt2rpp, ARGAGMt7pp, FADRx, FE3Ri, FLVRx, GLYALDtpp, GLYtpp, LDH_D, PHEMEabcpp, UREAtpp
128	-58.9846	EX_succ_e	7.97599	-7.5	0.157559	6	34.9228	-10.6764	-2.79929	27.7291	9.99301	b4382, b3844, b0010, b4115, b3927, b1380	ACt2rpp, ARGAGMt7pp, FADRx, FE3Ri, FLVRx, GLYALDtpp, GLYtpp, LDH_D, TMDPP, UREAtpp
129	-58.9846	EX_succ_e	7.97599	-7.5	0.157559	6	34.9228	-10.6764	-2.79929	27.7291	9.99301	b3844, b4117, b1014, b0010, b3927, b1380	ACt2rpp, ARGDC, FADRx, FE3Ri, FLVRx, GLYALDtpp, GLYtpp, LDH_D, P5CD, PROD3, UREAtpp
130	-58.9846	EX_succ_e	7.97599	-7.5	0.157559	6	34.9228	-10.6764	-2.79929	27.7291	9.99301	b3844, b0010, b4115, b3927, b1380, b0404	ACt2rpp, ARGAGMt7pp, FA100ACPHi, FA120ACPHi, FA140ACPHi, FA141ACPHi, FA160ACPHi, FA161ACPHi, FA80ACPHi, FADRx, FE3Ri, FLVRx, GLYALDtpp, GLYtpp, LDH_D, UREAtpp
131	-58.9846	EX_succ_e	7.97599	-7.5	0.157559	6	34.9228	-10.6764	-2.79929	27.7291	9.99301	b3844, b3960, b0010, b4115, b3927, b1380	ACt2rpp, ARGAGMt7pp, ARGSL, FADRx, FE3Ri, FLVRx, GLYALDtpp, GLYtpp, LDH_D, UREAtpp
132	-58.9846	EX_succ_e	7.97599	-7.5	0.157559	6	34.9228	-10.6764	-2.79929	27.7291	9.99301	b0767, b3844, b0010, b4115, b3927, b1380	ACt2rpp, ARGAGMt7pp, FADRx, FE3Ri, FLVRx, GLYALDtpp, GLYtpp, LDH_D, PGL, UREAtpp
133	-58.9846	EX_succ_e	7.97599	-7.5	0.157559	6	34.9228	-10.6764	-2.79929	27.7291	9.99301	b3844, b4117, b1852, b0010, b3927, b1380	ACt2rpp, ARGDC, FADRx, FE3Ri, FLVRx, G6PDH2r, GLYALDtpp, GLYtpp, LDH_D, UREAtpp
134	-58.9846	EX_succ_e	7.97599	-7.5	0.157559	6	34.9228	-10.6764	-2.79929	27.7291	9.99301	b1702, b3844, b0010, b4115, b3927, b1380	ACt2rpp, ARGAGMt7pp, FADRx, FE3Ri, FLVRx, GLYALDtpp, GLYtpp, LDH_D, PPS, UREAtpp
135	-58.9846	EX_succ_e	7.97599	-7.5	0.157559	6	34.9228	-10.6764	-2.79929	27.7291	9.99301	b1702, b3844, b4117, b0010, b3927, b1380	ACt2rpp, ARGDC, FADRx, FE3Ri, FLVRx, GLYALDtpp, GLYtpp, LDH_D, PPS, UREAtpp
136	-58.9846	EX_succ_e	7.97599	-7.5	0.157559	6	34.9228	-10.6764	-2.79929	27.7291	9.99301	b3844, b4117, b0010, b2406, b3927, b1380	ACt2rpp, ADNt2pp_copy2, ARGDC, CYTDt2pp_copy2, FADRx, FE3Ri, FLVRx, GLYALDtpp, GLYtpp, LDH_D, THMDt2pp_copy2, UREAtpp, URIt2pp_copy2, XTSNt2rpp
137	-58.9846	EX_succ_e	7.97599	-7.5	0.157559	6	34.9228	-10.6764	-2.79929	27.7291	9.99301	b3614, b3844, b4117, b0010, b3927, b1380	ACt2rpp, ARGDC, CDPPH, FADRx, FE3Ri, FLVRx, GLYALDtpp, GLYtpp, LDH_D, NDP7, UREAtpp
138	-58.9846	EX_succ_e	7.97599	-7.5	0.157559	6	34.9228	-10.6764	-2.79929	27.7291	9.99301	b3844, b4117, b0010, b3927, b1380, b2240	ACt2rpp, ARGDC, FADRx, FE3Ri, FLVRx, GLYALDtpp, GLYC3Pt6pp, GLYtpp, LDH_D, UREAtpp
139	-58.9846	EX_succ_e	7.97599	-7.5	0.157559	6	34.9228	-10.6764	-2.79929	27.7291	9.99301	b3844, b3945, b0010, b4115, b3927, b1380	ACt2rpp, ALR4x, APPLDHr, ARGAGMt7pp, FADRx, FE3Ri, FLVRx, GLYALDtpp, GLYCDx, GLYtpp, LALDO2x, LDH_D, UREAtpp
140	-58.9846	EX_succ_e	7.97599	-7.5	0.157559	6	34.9228	-10.6764	-2.79929	27.7291	9.99301	b3844, b4117, b3945, b0010, b3927, b1380	ACt2rpp, ALR4x, APPLDHr, ARGDC, FADRx, FE3Ri, FLVRx, GLYALDtpp, GLYCDx, GLYtpp, LALDO2x, LDH_D, UREAtpp
141	-58.9846	EX_succ_e	7.97599	-7.5	0.157559	6	34.9228	-10.6764	-2.79929	27.7291	9.99301	b3844, b4117, b0010, b3927, b1380, b1338	4ABZGLUH, ACt2rpp, ARGDC, FADRx, FE3Ri, FLVRx, GLYALDtpp, GLYtpp, LDH_D, UREAtpp
142	-58.9846	EX_succ_e	7.97599	-7.5	0.157559	6	34.9228	-10.6764	-2.79929	27.7291	9.99301	b3844, b4117, b0010, b3927, b1380, b1337	4ABZGLUH, ACt2rpp, ARGDC, FADRx, FE3Ri, FLVRx, GLYALDtpp, GLYtpp, LDH_D, UREAtpp
143	-58.9846	EX_succ_e	7.97599	-7.5	0.157559	6	34.9228	-10.6764	-2.79929	27.7291	9.99301	b3844, b0010, b4115, b0019, b3927, b1380	ACt2rpp, ARGAGMt7pp, FADRx, FE3Ri, FLVRx, GLYALDtpp, GLYtpp, LDH_D, NAt3_2pp, UREAtpp
144	-58.9846	EX_succ_e	7.97599	-7.5	0.157559	6	34.9228	-10.6764	-2.79929	27.7291	9.99301	b3844, b4117, b0010, b1967, b3927, b1380	ACt2rpp, ARGDC, FADRx, FE3Ri, FLVRx, GLYALDtpp, GLYOX3, GLYtpp, LDH_D, UREAtpp
145	-58.9846	EX_succ_e	7.97599	-7.5	0.157559	6	34.9228	-10.6764	-2.79929	27.7291	9.99301	b3844, b4117, b0010, b3213, b3927, b1380	ACt2rpp, ARGDC, FADRx, FE3Ri, FLVRx, GLUSy, GLYALDtpp, GLYtpp, LDH_D, UREAtpp
146	-58.9846	EX_succ_e	7.97599	-7.5	0.157559	6	34.9228	-10.6764	-2.79929	27.7291	9.99301	b3844, b2988, b4117, b0010, b3927, b1380	ACt2rpp, ARGDC, FADRx, FE3Ri, FLVRx, GLYALDtpp, GLYtpp, GSPMDA, GSPMDS, LDH_D, UREAtpp
147	-58.9846	EX_succ_e	7.97599	-7.5	0.157559	6	34.9228	-10.6764	-2.79929	27.7291	9.99301	b3844, b4117, b0674, b0010, b3927, b1380	ACt2rpp, ARGDC, ASNS1, FADRx, FE3Ri, FLVRx, GLYALDtpp, GLYtpp, LDH_D, UREAtpp
148	-58.9846	EX_succ_e	7.97599	-7.5	0.157559	6	34.9228	-10.6764	-2.79929	27.7291	9.99301	b3844, b4117, b0010, b3927, b1380, b0723	ACt2rpp, ARGDC, FADRx, FE3Ri, FLVRx, GLYALDtpp, GLYtpp, LDH_D, SUCDi, UREAtpp
149	-58.9846	EX_succ_e	7.97599	-7.5	0.157559	6	34.9228	-10.6764	-2.79929	27.7291	9.99301	b3844, b0010, b4115, b3927, b1380, b0723	ACt2rpp, ARGAGMt7pp, FADRx, FE3Ri, FLVRx, GLYALDtpp, GLYtpp, LDH_D, SUCDi, UREAtpp
150	-58.9846	EX_succ_e	7.97599	-7.5	0.157559	6	34.9228	-10.6764	-2.79929	27.7291	9.99301	b3844, b4117, b0010, b3927, b1380, b0722	ACt2rpp, ARGDC, FADRx, FE3Ri, FLVRx, GLYALDtpp, GLYtpp, LDH_D, SUCDi, UREAtpp
151	-58.9846	EX_succ_e	7.97599	-7.5	0.157559	6	34.9228	-10.6764	-2.79929	27.7291	9.99301	b0963, b3844, b4117, b0010, b3927, b1380	ACt2rpp, ARGDC, FADRx, FE3Ri, FLVRx, GLYALDtpp, GLYtpp, LDH_D, MGSA, UREAtpp
152	-58.9846	EX_succ_e	7.97599	-7.5	0.157559	6	34.9228	-10.6764	-2.79929	27.7291	9.99301	b0963, b3844, b0010, b4115, b3927, b1380	ACt2rpp, ARGAGMt7pp, FADRx, FE3Ri, FLVRx, GLYALDtpp, GLYtpp, LDH_D, MGSA, UREAtpp
153	-58.9846	EX_succ_e	7.97599	-7.5	0.157559	6	34.9228	-10.6764	-2.79929	27.7291	9.99301	b0030, b3844, b4117, b0010, b3927, b1380	ACt2rpp, ADNUC, ARGDC, FADRx, FE3Ri, FLVRx, GLYALDtpp, GLYtpp, INSH, LDH_D, UREAtpp, XTSNH
154	-58.9846	EX_succ_e	7.97599	-7.5	0.157559	6	34.9228	-10.6764	-2.79929	27.7291	9.99301	b1613, b3844, b4117, b0010, b3927, b1380	ACt2rpp, ARGDC, FADRx, FE3Ri, FLVRx, GLYALDtpp, GLYtpp, LDH_D, MAN6PI, UREAtpp
155	-58.9846	EX_succ_e	7.97599	-7.5	0.157559	6	34.9228	-10.6764	-2.79929	27.7291	9.99301	b3844, b4117, b4015, b0010, b3927, b1380	ACt2rpp, ARGDC, FADRx, FE3Ri, FLVRx, GLYALDtpp, GLYtpp, ICL, LDH_D, UREAtpp
156	-58.9846	EX_succ_e	7.97599	-7.5	0.157559	6	34.9228	-10.6764	-2.79929	27.7291	9.99301	b3844, b4122, b0010, b4115, b3927, b1380	ACt2rpp, ARGAGMt7pp, DTARTD, FADRx, FE3Ri, FLVRx, GLYALDtpp, GLYtpp, LDH_D, UREAtpp
157	-58.9846	EX_succ_e	7.97599	-7.5	0.157559	6	34.9228	-10.6764	-2.79929	27.7291	9.99301	b3844, b0010, b3460, b4115, b3927, b1380	ACt2rpp, ALAabcpp, ARGAGMt7pp, FADRx, FE3Ri, FLVRx, GLYALDtpp, GLYtpp, ILEabcpp, LDH_D, THRabcpp, UREAtpp, VALabcpp
158	-58.9846	EX_succ_e	7.97599	-7.5	0.157559	6	34.9228	-10.6764	-2.79929	27.7291	9.99301	b3844, b4117, b0010, b1102, b3927, b1380	ACt2rpp, ARGDC, CPGNtonex, FADRx, FE3Ri, FLVRx, GLYALDtpp, GLYtpp, LDH_D, UREAtpp
159	-58.9846	EX_succ_e	7.97599	-7.5	0.157559	6	34.9228	-10.6764	-2.79929	27.7291	9.99301	b3844, b4117, b0010, b2947, b3927, b1380	ACt2rpp, ARGDC, FADRx, FE3Ri, FLVRx, GLYALDtpp, GLYtpp, GTHS, LDH_D, UREAtpp
160	-58.9846	EX_succ_e	7.97599	-7.5	0.157559	6	34.9228	-10.6764	-2.79929	27.7291	9.99301	b3844, b2688, b0010, b4115, b3927, b1380	ACt2rpp, ARGAGMt7pp, FADRx, FE3Ri, FLVRx, GLUCYS, GLYALDtpp, GLYtpp, LDH_D, UREAtpp
161	-58.9846	EX_succ_e	7.97599	-7.5	0.157559	6	34.9228	-10.6764	-2.79929	27.7291	9.99301	b3844, b4117, b2688, b0010, b3927, b1380	ACt2rpp, ARGDC, FADRx, FE3Ri, FLVRx, GLUCYS, GLYALDtpp, GLYtpp, LDH_D, UREAtpp
162	-58.9846	EX_succ_e	7.97599	-7.5	0.157559	6	34.9228	-10.6764	-2.79929	27.7291	9.99301	b1479, b3844, b4117, b0010, b3927, b1380	ACt2rpp, ARGDC, FADRx, FE3Ri, FLVRx, GLYALDtpp, GLYtpp, LDH_D, ME1, UREAtpp
163	-58.9846	EX_succ_e	7.97599	-7.5	0.157559	6	34.9228	-10.6764	-2.79929	27.7291	9.99301	b3844, b4117, b0010, b3927, b1380, b0968	ACt2rpp, APH120, APH140, APH141, APH160, APH161, APH180, APH181, ARGDC, FADRx, FE3Ri, FLVRx, GLYALDtpp, GLYtpp, LDH_D, UREAtpp
164	-58.9846	EX_succ_e	7.97599	-7.5	0.157559	6	34.9228	-10.6764	-2.79929	27.7291	9.99301	b3844, b0010, b4115, b3927, b1380, b0968	ACt2rpp, APH120, APH140, APH141, APH160, APH161, APH180, APH181, ARGAGMt7pp, FADRx, FE3Ri, FLVRx, GLYALDtpp, GLYtpp, LDH_D, UREAtpp
165	-58.9846	EX_succ_e	7.97599	-7.5	0.157559	6	34.9228	-10.6764	-2.79929	27.7291	9.99301	b3844, b4117, b0010, b4067, b3927, b1380	ACt2rpp, ACt4pp, ARGDC, FADRx, FE3Ri, FLVRx, GLYALDtpp, GLYCLTt4pp, GLYtpp, LDH_D, UREAtpp
166	-58.9846	EX_succ_e	7.97599	-7.5	0.157559	6	34.9228	-10.6764	-2.79929	27.7291	9.99301	b3844, b4117, b0010, b2868, b3927, b1380	ACt2rpp, ARGDC, FADRx, FE3Ri, FLVRx, GLYALDtpp, GLYtpp, HXAND, LDH_D, UREAtpp, XAND
167	-58.9846	EX_succ_e	7.97599	-7.5	0.157559	6	34.9228	-10.6764	-2.79929	27.7291	9.99301	b3844, b4117, b0010, b2867, b3927, b1380	ACt2rpp, ARGDC, FADRx, FE3Ri, FLVRx, GLYALDtpp, GLYtpp, HXAND, LDH_D, UREAtpp, XAND
168	-58.9846	EX_succ_e	7.97599	-7.5	0.157559	6	34.9228	-10.6764	-2.79929	27.7291	9.99301	b3844, b4117, b0010, b2866, b3927, b1380	ACt2rpp, ARGDC, FADRx, FE3Ri, FLVRx, GLYALDtpp, GLYtpp, HXAND, LDH_D, UREAtpp, XAND
169	-58.9846	EX_succ_e	7.97599	-7.5	0.157559	6	34.9228	-10.6764	-2.79929	27.7291	9.99301	b3844, b4117, b0010, b3927, b1380, b1600	ACt2rpp, ARGDC, FADRx, FE3Ri, FLVRx, GLYALDtpp, GLYtpp, LDH_D, SPMDt3pp, UREAtpp
170	-58.9846	EX_succ_e	7.97599	-7.5	0.157559	6	34.9228	-10.6764	-2.79929	27.7291	9.99301	b3844, b4117, b0010, b2913, b3927, b1380	ACt2rpp, AHGDx, ARGDC, ARHGDx, FADRx, FE3Ri, FLVRx, GLYALDtpp, GLYtpp, LDH_D, PGCD, UREAtpp
171	-58.9846	EX_succ_e	7.97599	-7.5	0.157559	6	34.9228	-10.6764	-2.79929	27.7291	9.99301	b2744, b3844, b4117, b0010, b3927, b1380	ACt2rpp, ARGDC, FADRx, FE3Ri, FLVRx, GLYALDtpp, GLYtpp, LDH_D, NTD10, UREAtpp
172	-58.9846	EX_succ_e	7.97599	-7.5	0.157559	6	34.9228	-10.6764	-2.79929	27.7291	9.99301	b3844, b4117, b0010, b3927, b1380, b1397	3OXCOAT, ACt2rpp, ARGDC, FADRx, FE3Ri, FLVRx, GLYALDtpp, GLYtpp, LDH_D, OXDHCOAT, UREAtpp
173	-58.9846	EX_succ_e	7.97599	-7.5	0.157559	6	34.9228	-10.6764	-2.79929	27.7291	9.99301	b3844, b4117, b0010, b3927, b1380, b1388	ACt2rpp, ARGDC, FADRx, FE3Ri, FLVRx, GLYALDtpp, GLYtpp, LDH_D, PACCOAE, UREAtpp
174	-58.9846	EX_succ_e	7.97599	-7.5	0.157559	6	34.9228	-10.6764	-2.79929	27.7291	9.99301	b3844, b0010, b4115, b3927, b1380, b1387	ACt2rpp, ARGAGMt7pp, FADRx, FE3Ri, FLVRx, GLYALDtpp, GLYtpp, LDH_D, OXCOAHDH, UREAtpp
175	-58.9846	EX_succ_e	7.97599	-7.5	0.157559	6	34.9228	-10.6764	-2.79929	27.7291	9.99301	b3844, b0010, b4115, b3927, b1380, b1393	ACt2rpp, ARGAGMt7pp, DHACOAH, FADRx, FE3Ri, FLVRx, GLYALDtpp, GLYtpp, LDH_D, UREAtpp
176	-58.9846	EX_succ_e	7.97599	-7.5	0.157559	6	34.9228	-10.6764	-2.79929	27.7291	9.99301	b3844, b4117, b0010, b3927, b1380, b1391	ACt2rpp, ARGDC, FADRx, FE3Ri, FLVRx, GLYALDtpp, GLYtpp, LDH_D, PACCOAE, UREAtpp
177	-58.9846	EX_succ_e	7.97599	-7.5	0.157559	6	34.9228	-10.6764	-2.79929	27.7291	9.99301	b3844, b4117, b0010, b3927, b1380, b1389	ACt2rpp, ARGDC, FADRx, FE3Ri, FLVRx, GLYALDtpp, GLYtpp, LDH_D, PACCOAE, UREAtpp
178	-58.9846	EX_succ_e	7.97599	-7.5	0.157559	6	34.9228	-10.6764	-2.79929	27.7291	9.99301	b3844, b0010, b4115, b3927, b1380, b1388	ACt2rpp, ARGAGMt7pp, FADRx, FE3Ri, FLVRx, GLYALDtpp, GLYtpp, LDH_D, PACCOAE, UREAtpp
179	-58.9846	EX_succ_e	7.97599	-7.5	0.157559	6	34.9228	-10.6764	-2.79929	27.7291	9.99301	b3844, b0010, b4115, b3726, b3927, b1380	ACt2rpp, ARGAGMt7pp, FADRx, FE3Ri, FLVRx, GLYALDtpp, GLYtpp, LDH_D, PIuabcpp, UREAtpp
180	-58.9846	EX_succ_e	7.97599	-7.5	0.157559	6	34.9228	-10.6764	-2.79929	27.7291	9.99301	b3844, b4117, b0010, b3728, b3927, b1380	ACt2rpp, ARGDC, FADRx, FE3Ri, FLVRx, GLYALDtpp, GLYtpp, LDH_D, PIuabcpp, UREAtpp
181	-58.9846	EX_succ_e	7.97599	-7.5	0.157559	6	34.9228	-10.6764	-2.79929	27.7291	9.99301	b3844, b0888, b4117, b0010, b3927, b1380	ACt2rpp, ARGDC, FADRx, FE3Ri, FLVRx, GLYALDtpp, GLYtpp, LDH_D, TRDR, UREAtpp
182	-58.9846	EX_succ_e	7.97599	-7.5	0.157559	6	34.9228	-10.6764	-2.79929	27.7291	9.99301	b3844, b0010, b4115, b3927, b1380, b1592	ACt2rpp, ARGAGMt7pp, CLtipp, FADRx, FE3Ri, FLVRx, GLYALDtpp, GLYtpp, LDH_D, UREAtpp
183	-58.9846	EX_succ_e	7.97599	-7.5	0.157559	6	34.9228	-10.6764	-2.79929	27.7291	9.99301	b3844, b0010, b4115, b1189, b3927, b1380	ACt2rpp, ARGAGMt7pp, DAAD, FADRx, FE3Ri, FLVRx, GLYALDtpp, GLYtpp, LDH_D, UREAtpp
184	-58.9846	EX_succ_e	7.97599	-7.5	0.157559	6	34.9228	-10.6764	-2.79929	27.7291	9.99301	b3844, b4117, b2799, b0010, b3927, b1380	ACt2rpp, ARGDC, FADRx, FE3Ri, FLVRx, GLYALDtpp, GLYtpp, LCARS, LDH_D, UREAtpp
185	-58.9846	EX_succ_e	7.97599	-7.5	0.157559	6	34.9228	-10.6764	-2.79929	27.7291	9.99301	b3844, b0010, b4115, b3927, b1380, b1813	ACt2rpp, ARGAGMt7pp, FADRx, FE3Ri, FLVRx, GLYALDtpp, GLYtpp, HPYRP, LDH_D, UREAtpp
186	-58.9846	EX_succ_e	7.97599	-7.5	0.157559	6	34.9228	-10.6764	-2.79929	27.7291	9.99301	b3844, b4117, b0010, b4381, b3927, b1380	ACt2rpp, ARGDC, DRPA, FADRx, FE3Ri, FLVRx, GLYALDtpp, GLYtpp, LDH_D, UREAtpp
187	-58.9846	EX_succ_e	7.97599	-7.5	0.157559	6	34.9228	-10.6764	-2.79929	27.7291	9.99301	b3844, b0010, b4072, b4115, b3927, b1380	ACt2rpp, ARGAGMt7pp, FADRx, FE3Ri, FLVRx, GLYALDtpp, GLYtpp, LDH_D, NTRIR3pp, NTRIR4pp, UREAtpp
188	-58.9846	EX_succ_e	7.97599	-7.5	0.157559	6	34.9228	-10.6764	-2.79929	27.7291	9.99301	b3844, b4117, b0010, b4072, b3927, b1380	ACt2rpp, ARGDC, FADRx, FE3Ri, FLVRx, GLYALDtpp, GLYtpp, LDH_D, NTRIR3pp, NTRIR4pp, UREAtpp
189	-58.9846	EX_succ_e	7.97599	-7.5	0.157559	6	34.9228	-10.6764	-2.79929	27.7291	9.99301	b3844, b4117, b0010, b4071, b3927, b1380	ACt2rpp, ARGDC, FADRx, FE3Ri, FLVRx, GLYALDtpp, GLYtpp, LDH_D, NTRIR3pp, NTRIR4pp, UREAtpp
190	-58.9846	EX_succ_e	7.97599	-7.5	0.157559	6	34.9228	-10.6764	-2.79929	27.7291	9.99301	b3844, b4117, b0010, b3927, b3469, b1380	ACt2rpp, ARGDC, CD2abcpp, COBALT2abcpp, CU2abcpp, FADRx, FE3Ri, FLVRx, GLYALDtpp, GLYtpp, HG2abcpp, LDH_D, NI2abcpp, UREAtpp, ZN2abcpp
191	-58.9846	EX_succ_e	7.97599	-7.5	0.157559	6	34.9228	-10.6764	-2.79929	27.7291	9.99301	b3844, b3091, b0010, b4115, b3927, b1380	ACt2rpp, ALTRH, ARGAGMt7pp, FADRx, FE3Ri, FLVRx, GLYALDtpp, GLYtpp, LDH_D, UREAtpp
192	-58.9846	EX_succ_e	7.97599	-7.5	0.157559	6	34.9228	-10.6764	-2.79929	27.7291	9.99301	b3844, b0010, b4115, b3927, b1380, b3093	ACt2rpp, ARGAGMt7pp, FADRx, FE3Ri, FLVRx, GALURt2rpp, GLYALDtpp, GLYtpp, LDH_D, UREAtpp
193	-58.9846	EX_succ_e	7.97599	-7.5	0.157559	6	34.9228	-10.6764	-2.79929	27.7291	9.99301	b3844, b4117, b1521, b0010, b3927, b1380	ACt2rpp, ARGDC, FADRx, FE3Ri, FLVRx, GLYALDtpp, GLYtpp, LDH_D, TAGURr, UREAtpp
194	-58.9846	EX_succ_e	7.97599	-7.5	0.157559	6	34.9228	-10.6764	-2.79929	27.7291	9.99301	b0063, b3844, b0010, b4115, b3927, b1380	ACt2rpp, ARGAGMt7pp, FADRx, FE3Ri, FLVRx, GLYALDtpp, GLYtpp, LDH_D, RBK_L1, UREAtpp
195	-58.9846	EX_succ_e	7.97599	-7.5	0.157559	6	34.9228	-10.6764	-2.79929	27.7291	9.99301	b3844, b4117, b2498, b0010, b3927, b1380	ACt2rpp, ARGDC, FADRx, FE3Ri, FLVRx, GLYALDtpp, GLYtpp, LDH_D, UPPRT, UREAtpp
196	-58.9846	EX_succ_e	7.97599	-7.5	0.157559	6	34.9228	-10.6764	-2.79929	27.7291	9.99301	b3844, b2498, b0010, b4115, b3927, b1380	ACt2rpp, ARGAGMt7pp, FADRx, FE3Ri, FLVRx, GLYALDtpp, GLYtpp, LDH_D, UPPRT, UREAtpp
197	-58.9846	EX_succ_e	7.97599	-7.5	0.157559	6	34.9228	-10.6764	-2.79929	27.7291	9.99301	b3844, b4117, b0010, b3927, b1380, b2175	4PCPpp, ACt2rpp, AGM4PCPpp, ARGDC, FADRx, FE3Ri, FLVRx, GLYALDtpp, GLYtpp, LDH_D, UREAtpp
198	-58.9846	EX_succ_e	7.97599	-7.5	0.157559	6	34.9228	-10.6764	-2.79929	27.7291	9.99301	b2599, b3844, b4117, b0010, b3927, b1380	ACt2rpp, ARGDC, FADRx, FE3Ri, FLVRx, GLYALDtpp, GLYtpp, LDH_D, PPNDH, UREAtpp
199	-58.9846	EX_succ_e	7.97599	-7.5	0.157559	6	34.9228	-10.6764	-2.79929	27.7291	9.99301	b3844, b4117, b2803, b0010, b3927, b1380	ACt2rpp, ARGDC, FADRx, FCLK, FE3Ri, FLVRx, GLYALDtpp, GLYtpp, LDH_D, UREAtpp
200	-58.9846	EX_succ_e	7.97599	-7.5	0.157559	6	34.9228	-10.6764	-2.79929	27.7291	9.99301	b3844, b2802, b0010, b4115, b3927, b1380	ACt2rpp, ARABDI, ARGAGMt7pp, FADRx, FCI, FE3Ri, FLVRx, GLYALDtpp, GLYtpp, LDH_D, UREAtpp
201	-58.9846	EX_succ_e	7.97599	-7.5	0.157559	6	34.9228	-10.6764	-2.79929	27.7291	9.99301	b3844, b0010, b4115, b4289, b3927, b1380	ACt2rpp, ARGAGMt7pp, FADRx, FE3DCITabcpp, FE3Ri, FLVRx, GLYALDtpp, GLYtpp, LDH_D, UREAtpp
202	-58.9846	EX_succ_e	7.97599	-7.5	0.157559	6	34.9228	-10.6764	-2.79929	27.7291	9.99301	b3844, b4117, b0010, b4288, b3927, b1380	ACt2rpp, ARGDC, FADRx, FE3DCITabcpp, FE3Ri, FLVRx, GLYALDtpp, GLYtpp, LDH_D, UREAtpp
203	-58.9846	EX_succ_e	7.97599	-7.5	0.157559	6	34.9228	-10.6764	-2.79929	27.7291	9.99301	b3844, b0010, b4115, b4287, b3927, b1380	ACt2rpp, ARGAGMt7pp, FADRx, FE3DCITabcpp, FE3Ri, FLVRx, GLYALDtpp, GLYtpp, LDH_D, UREAtpp
204	-58.9846	EX_succ_e	7.97599	-7.5	0.157559	6	34.9228	-10.6764	-2.79929	27.7291	9.99301	b1850, b3844, b4117, b0010, b3927, b1380	ACt2rpp, ARGDC, EDA, FADRx, FE3Ri, FLVRx, GLYALDtpp, GLYtpp, LDH_D, OAADC, UREAtpp
205	-58.9846	EX_succ_e	7.97599	-7.5	0.157559	6	34.9228	-10.6764	-2.79929	27.7291	9.99301	b3844, b4117, b3365, b0010, b3927, b1380	ACt2rpp, ARGDC, FADRx, FE3Ri, FLVRx, GLYALDtpp, GLYtpp, LDH_D, NTRIR2x, UREAtpp
206	-58.9846	EX_succ_e	7.97599	-7.5	0.157559	6	34.9228	-10.6764	-2.79929	27.7291	9.99301	b3844, b0010, b4115, b0343, b3927, b1380	ACt2rpp, ARGAGMt7pp, FADRx, FE3Ri, FLVRx, GLYALDtpp, GLYtpp, LCTStpp, LDH_D, UREAtpp
207	-58.9846	EX_succ_e	7.97599	-7.5	0.157559	6	34.9228	-10.6764	-2.79929	27.7291	9.99301	b3844, b4117, b2903, b0010, b3927, b1380	ACt2rpp, ARGDC, FADRx, FE3Ri, FLVRx, GLYALDtpp, GLYCL, GLYtpp, LDH_D, UREAtpp
208	-58.9846	EX_succ_e	7.97599	-7.5	0.157559	6	34.9228	-10.6764	-2.79929	27.7291	9.99301	b3844, b4117, b2904, b0010, b3927, b1380	ACt2rpp, ARGDC, FADRx, FE3Ri, FLVRx, GLYALDtpp, GLYCL, GLYtpp, LDH_D, UREAtpp
209	-58.9846	EX_succ_e	7.97599	-7.5	0.157559	6	34.9228	-10.6764	-2.79929	27.7291	9.99301	b3844, b4117, b2905, b0010, b3927, b1380	ACt2rpp, ARGDC, FADRx, FE3Ri, FLVRx, GLYALDtpp, GLYCL, GLYtpp, LDH_D, UREAtpp
210	-58.9846	EX_succ_e	7.97599	-7.5	0.157559	6	34.9228	-10.6764	-2.79929	27.7291	9.99301	b3844, b2904, b0010, b4115, b3927, b1380	ACt2rpp, ARGAGMt7pp, FADRx, FE3Ri, FLVRx, GLYALDtpp, GLYCL, GLYtpp, LDH_D, UREAtpp
211	-58.9846	EX_succ_e	7.97599	-7.5	0.157559	6	34.9228	-10.6764	-2.79929	27.7291	9.99301	b3844, b4117, b0010, b4036, b3927, b1380	14GLUCANtexi, ACt2rpp, ARGDC, FADRx, FE3Ri, FLVRx, GLCtex_copy1, GLYALDtpp, GLYtpp, LDH_D, MALTHXtexi, MALTPTtexi, MALTTRtexi, MALTTTRtexi, MALTtexi, UREAtpp
212	-58.9846	EX_succ_e	7.97599	-7.5	0.157559	6	34.9228	-10.6764	-2.79929	27.7291	9.99301	b3844, b4117, b0010, b0591, b3927, b1380	ACt2rpp, ARGDC, FADRx, FE3Ri, FEENTERtpp, FLVRx, GLYALDtpp, GLYtpp, LDH_D, UREAtpp
213	-58.9846	EX_succ_e	7.97599	-7.5	0.157559	6	34.9228	-10.6764	-2.79929	27.7291	9.99301	b3844, b0010, b4115, b3927, b1380, b1010	ACt2rpp, ARGAGMt7pp, FADRx, FE3Ri, FLVRx, GLYALDtpp, GLYtpp, LDH_D, POAACR, UREAtpp
214	-58.9846	EX_succ_e	7.97599	-7.5	0.157559	6	34.9228	-10.6764	-2.79929	27.7291	9.99301	b3844, b0010, b4115, b3927, b1380, b1011	ACt2rpp, ARGAGMt7pp, FADRx, FE3Ri, FLVRx, GLYALDtpp, GLYtpp, LDH_D, URACPAH, UREAtpp
215	-58.9846	EX_succ_e	7.97599	-7.5	0.157559	6	34.9228	-10.6764	-2.79929	27.7291	9.99301	b3844, b4117, b0010, b3927, b1380, b2917	ACt2rpp, ARGDC, FADRx, FE3Ri, FLVRx, GLYALDtpp, GLYtpp, LDH_D, MMM, UREAtpp
216	-58.9846	EX_succ_e	7.97599	-7.5	0.157559	6	34.9228	-10.6764	-2.79929	27.7291	9.99301	b3844, b0010, b4115, b3927, b1380, b2660	ACt2rpp, ARGAGMt7pp, FADRx, FE3Ri, FLVRx, GLYALDtpp, GLYtpp, LDH_D, SHGO, UREAtpp
217	-58.9846	EX_succ_e	7.97599	-7.5	0.157559	6	34.9228	-10.6764	-2.79929	27.7291	9.99301	b3844, b4117, b0010, b3927, b1380, b2660	ACt2rpp, ARGDC, FADRx, FE3Ri, FLVRx, GLYALDtpp, GLYtpp, LDH_D, SHGO, UREAtpp
218	-58.9846	EX_succ_e	7.97599	-7.5	0.157559	6	34.9228	-10.6764	-2.79929	27.7291	9.99301	b3844, b0010, b4115, b2818, b3927, b1380	ACGS, ACt2rpp, ARGAGMt7pp, FADRx, FE3Ri, FLVRx, GLYALDtpp, GLYtpp, LDH_D, UREAtpp
219	-58.9846	EX_succ_e	7.97599	-7.5	0.157559	6	34.9228	-10.6764	-2.79929	27.7291	9.99301	b3844, b4117, b3958, b0010, b3927, b1380	ACt2rpp, AGPR, ARGDC, FADRx, FE3Ri, FLVRx, GLYALDtpp, GLYtpp, LDH_D, UREAtpp
220	-58.9846	EX_succ_e	7.97599	-7.5	0.157559	6	34.9228	-10.6764	-2.79929	27.7291	9.99301	b3844, b4117, b0010, b2818, b3927, b1380	ACGS, ACt2rpp, ARGDC, FADRx, FE3Ri, FLVRx, GLYALDtpp, GLYtpp, LDH_D, UREAtpp
221	-58.9846	EX_succ_e	7.97599	-7.5	0.157559	6	34.9228	-10.6764	-2.79929	27.7291	9.99301	b3844, b3958, b0010, b4115, b3927, b1380	ACt2rpp, AGPR, ARGAGMt7pp, FADRx, FE3Ri, FLVRx, GLYALDtpp, GLYtpp, LDH_D, UREAtpp
222	-58.9846	EX_succ_e	7.97599	-7.5	0.157559	6	34.9228	-10.6764	-2.79929	27.7291	9.99301	b3844, b4117, b0010, b3654, b3927, b1380	ACt2rpp, ARGDC, FADRx, FE3Ri, FLVRx, GLYALDtpp, GLYtpp, GUAt2pp, LDH_D, UREAtpp
223	-58.9846	EX_succ_e	7.97599	-7.5	0.157559	6	34.9228	-10.6764	-2.79929	27.7291	9.99301	b3844, b0010, b4115, b3654, b3927, b1380	ACt2rpp, ARGAGMt7pp, FADRx, FE3Ri, FLVRx, GLYALDtpp, GLYtpp, GUAt2pp, LDH_D, UREAtpp
224	-58.9846	EX_succ_e	7.97599	-7.5	0.157559	6	34.9228	-10.6764	-2.79929	27.7291	9.99301	b3844, b4117, b0010, b3779, b3927, b1380	ACt2rpp, ARGDC, FADRx, FE3Ri, FLVRx, GLYALDtpp, GLYtpp, GTPDPDP, LDH_D, UREAtpp
225	-58.9846	EX_succ_e	7.97599	-7.5	0.157559	6	34.9228	-10.6764	-2.79929	27.7291	9.99301	b3844, b0010, b4115, b3927, b1380, b2923	ACt2rpp, ARGAGMt7pp, ARGt3pp, FADRx, FE3Ri, FLVRx, GLYALDtpp, GLYtpp, LDH_D, UREAtpp
226	-58.9846	EX_succ_e	7.97599	-7.5	0.157559	6	34.9228	-10.6764	-2.79929	27.7291	9.99301	b3844, b4117, b0010, b2841, b3927, b1380	ACt2rpp, ARBt2rpp, ARGDC, FADRx, FE3Ri, FLVRx, GLYALDtpp, GLYtpp, LDH_D, UREAtpp
227	-58.9846	EX_succ_e	7.97599	-7.5	0.157559	6	34.9228	-10.6764	-2.79929	27.7291	9.99301	b3844, b0010, b4115, b3927, b3825, b1380	ACt2rpp, ARGAGMt7pp, FADRx, FE3Ri, FLVRx, GLYALDtpp, GLYtpp, LDH_D, LPLIPAL2A120, LPLIPAL2A140, LPLIPAL2A141, LPLIPAL2A160, LPLIPAL2A161, LPLIPAL2A180, LPLIPAL2A181, LPLIPAL2ATE120, LPLIPAL2ATE140, LPLIPAL2ATE141, LPLIPAL2ATE160, LPLIPAL2ATE161, LPLIPAL2ATE180, LPLIPAL2ATE181, LPLIPAL2ATG120, LPLIPAL2ATG140, LPLIPAL2ATG141, LPLIPAL2ATG160, LPLIPAL2ATG161, LPLIPAL2ATG180, LPLIPAL2ATG181, LPLIPAL2E…
228	-58.9846	EX_succ_e	7.97599	-7.5	0.157559	6	34.9228	-10.6764	-2.79929	27.7291	9.99301	b3844, b4117, b0010, b3927, b3825, b1380	ACt2rpp, ARGDC, FADRx, FE3Ri, FLVRx, GLYALDtpp, GLYtpp, LDH_D, LPLIPAL2A120, LPLIPAL2A140, LPLIPAL2A141, LPLIPAL2A160, LPLIPAL2A161, LPLIPAL2A180, LPLIPAL2A181, LPLIPAL2ATE120, LPLIPAL2ATE140, LPLIPAL2ATE141, LPLIPAL2ATE160, LPLIPAL2ATE161, LPLIPAL2ATE180, LPLIPAL2ATE181, LPLIPAL2ATG120, LPLIPAL2ATG140, LPLIPAL2ATG141, LPLIPAL2ATG160, LPLIPAL2ATG161, LPLIPAL2ATG180, LPLIPAL2ATG181, LPLIPAL2E120, …
229	-58.9846	EX_succ_e	7.97599	-7.5	0.157559	6	34.9228	-10.6764	-2.79929	27.7291	9.99301	b3844, b4117, b0010, b0237, b3927, b1380	ACt2rpp, ARGDC, FADRx, FE3Ri, FLVRx, GLYALDtpp, GLYtpp, LALGP, LDH_D, UREAtpp
230	-58.9846	EX_succ_e	7.97599	-7.5	0.157559	6	34.9228	-10.6764	-2.79929	27.7291	9.99301	b3844, b0010, b4115, b1325, b3927, b1380	ACt2rpp, ALAGLUE, ARGAGMt7pp, FADRx, FE3Ri, FLVRx, GLYALDtpp, GLYtpp, LDH_D, UREAtpp
231	-58.9846	EX_succ_e	7.97599	-7.5	0.157559	6	34.9228	-10.6764	-2.79929	27.7291	9.99301	b3844, b4117, b0010, b1326, b3927, b1380	ACt2rpp, ARGDC, FADRx, FE3Ri, FLVRx, GLYALDtpp, GLYtpp, LADGMDH, LDH_D, UREAtpp
232	-58.9846	EX_succ_e	7.97599	-7.5	0.157559	6	34.9228	-10.6764	-2.79929	27.7291	9.99301	b3844, b4117, b0010, b3927, b3432, b1380	ACt2rpp, ARGDC, FADRx, FE3Ri, FLVRx, GLBRAN2, GLYALDtpp, GLYtpp, LDH_D, UREAtpp
233	-58.9846	EX_succ_e	7.97599	-7.5	0.157559	6	34.9228	-10.6764	-2.79929	27.7291	9.99301	b3430, b3844, b4117, b0010, b3927, b1380	ACt2rpp, ARGDC, FADRx, FE3Ri, FLVRx, GLGC, GLYALDtpp, GLYtpp, LDH_D, UREAtpp
234	-58.9846	EX_succ_e	7.97599	-7.5	0.157559	6	34.9228	-10.6764	-2.79929	27.7291	9.99301	b3844, b3429, b0010, b4115, b3927, b1380	ACt2rpp, ARGAGMt7pp, FADRx, FE3Ri, FLVRx, GLCS1, GLYALDtpp, GLYtpp, LDH_D, UREAtpp
235	-58.9846	EX_succ_e	7.97599	-7.5	0.157559	6	34.9228	-10.6764	-2.79929	27.7291	9.99301	b3844, b4117, b3565, b0010, b3927, b1380	ACt2rpp, ARGDC, FADRx, FE3Ri, FLVRx, GLYALDtpp, GLYtpp, LDH_D, UREAtpp, XYLI1, XYLI2
236	-58.9846	EX_succ_e	7.97599	-7.5	0.157559	6	34.9228	-10.6764	-2.79929	27.7291	9.99301	b3844, b0010, b4115, b3005, b3927, b1380	ACt2rpp, ADOCBLtonex, ARGAGMt7pp, CBItonex, CBL1tonex, CPGNtonex, FADRx, FE3DCITtonex, FE3DHBZStonex, FE3HOXtonex, FE3Ri, FECRMtonex, FEENTERtonex, FEOXAMtonex, FLVRx, GLYALDtpp, GLYtpp, LDH_D, UREAtpp
237	-58.9846	EX_succ_e	7.97599	-7.5	0.157559	6	34.9228	-10.6764	-2.79929	27.7291	9.99301	b3844, b0010, b4115, b3006, b3927, b1380	ACt2rpp, ADOCBLtonex, ARGAGMt7pp, CBItonex, CBL1tonex, CPGNtonex, FADRx, FE3DCITtonex, FE3DHBZStonex, FE3HOXtonex, FE3Ri, FECRMtonex, FEENTERtonex, FEOXAMtonex, FLVRx, GLYALDtpp, GLYtpp, LDH_D, UREAtpp
238	-58.9846	EX_succ_e	7.97599	-7.5	0.157559	6	34.9228	-10.6764	-2.79929	27.7291	9.99301	b3844, b4117, b0010, b3005, b3927, b1380	ACt2rpp, ADOCBLtonex, ARGDC, CBItonex, CBL1tonex, CPGNtonex, FADRx, FE3DCITtonex, FE3DHBZStonex, FE3HOXtonex, FE3Ri, FECRMtonex, FEENTERtonex, FEOXAMtonex, FLVRx, GLYALDtpp, GLYtpp, LDH_D, UREAtpp
239	-58.9846	EX_succ_e	7.97599	-7.5	0.157559	6	34.9228	-10.6764	-2.79929	27.7291	9.99301	b3844, b4117, b0010, b3006, b3927, b1380	ACt2rpp, ADOCBLtonex, ARGDC, CBItonex, CBL1tonex, CPGNtonex, FADRx, FE3DCITtonex, FE3DHBZStonex, FE3HOXtonex, FE3Ri, FECRMtonex, FEENTERtonex, FEOXAMtonex, FLVRx, GLYALDtpp, GLYtpp, LDH_D, UREAtpp
240	-58.9846	EX_succ_e	7.97599	-7.5	0.157559	6	34.9228	-10.6764	-2.79929	27.7291	9.99301	b3844, b4117, b0010, b3927, b1380, b0662	ACt2rpp, ARGDC, FADRx, FE3Ri, FLVRx, GLYALDtpp, GLYtpp, LDH_D, OMMBLHXy, UREAtpp
241	-58.9846	EX_succ_e	7.97599	-7.5	0.157559	6	34.9228	-10.6764	-2.79929	27.7291	9.99301	b3844, b0411, b0010, b4115, b3927, b1380	ACt2rpp, ADNtex, ARGAGMt7pp, DADNtex, DCYTtex, DURItex, FADRx, FE3Ri, FLVRx, GLYALDtpp, GLYtpp, GUAtex, INStex, LDH_D, UREAtpp, URItex
242	-58.9846	EX_succ_e	7.97599	-7.5	0.157559	6	34.9228	-10.6764	-2.79929	27.7291	9.99301	b3844, b4117, b0411, b0010, b3927, b1380	ACt2rpp, ADNtex, ARGDC, DADNtex, DCYTtex, DURItex, FADRx, FE3Ri, FLVRx, GLYALDtpp, GLYtpp, GUAtex, INStex, LDH_D, UREAtpp, URItex
243	-58.9846	EX_succ_e	7.97599	-7.5	0.157559	6	34.9228	-10.6764	-2.79929	27.7291	9.99301	b3844, b4117, b0010, b3927, b1380, b1771	ACt2rpp, ALR2x, ARGDC, FADRx, FE3Ri, FLVRx, GLYALDtpp, GLYtpp, LDH_D, UREAtpp
244	-58.9846	EX_succ_e	7.97599	-7.5	0.157559	6	34.9228	-10.6764	-2.79929	27.7291	9.99301	b3844, b0010, b2675, b4115, b3927, b1380	ACt2rpp, ARGAGMt7pp, FADRx, FE3Ri, FLVRx, GLYALDtpp, GLYtpp, LDH_D, RNDR1b, RNDR2b, RNDR3b, RNDR4b, UREAtpp
245	-58.9846	EX_succ_e	7.97599	-7.5	0.157559	6	34.9228	-10.6764	-2.79929	27.7291	9.99301	b3844, b4117, b0010, b3927, b1380, b4167	ACt2rpp, ARGDC, FADRx, FE3Ri, FLVRx, GLYALDtpp, GLYtpp, LDH_D, NADHXD, NADHXE, NADPHXD, NADPHXE, UREAtpp
246	-58.9846	EX_succ_e	7.97599	-7.5	0.157559	6	34.9228	-10.6764	-2.79929	27.7291	9.99301	b3844, b2838, b4117, b0010, b3927, b1380	ACt2rpp, ARGDC, DAPDC, FADRx, FE3Ri, FLVRx, GLYALDtpp, GLYtpp, LDH_D, UREAtpp
247	-58.9846	EX_succ_e	7.97599	-7.5	0.157559	6	34.9228	-10.6764	-2.79929	27.7291	9.99301	b1855, b3844, b0010, b4115, b3927, b1380	ACt2rpp, ARGAGMt7pp, EDTXS2, EDTXS4, FADRx, FE3Ri, FLVRx, GLYALDtpp, GLYtpp, LDH_D, UREAtpp
248	-58.9846	EX_succ_e	7.97599	-7.5	0.157559	6	34.9228	-10.6764	-2.79929	27.7291	9.99301	b1263, b3844, b0010, b4115, b3927, b1380	ACt2rpp, ANPRT, ANS, ARGAGMt7pp, FADRx, FE3Ri, FLVRx, GLYALDtpp, GLYtpp, LDH_D, UREAtpp
249	-58.9846	EX_succ_e	7.97599	-7.5	0.157559	6	34.9228	-10.6764	-2.79929	27.7291	9.99301	b1262, b3844, b4117, b0010, b3927, b1380	ACt2rpp, ARGDC, FADRx, FE3Ri, FLVRx, GLYALDtpp, GLYtpp, IGPS, LDH_D, PRAIi, UREAtpp
250	-58.9846	EX_succ_e	7.97599	-7.5	0.157559	6	34.9228	-10.6764	-2.79929	27.7291	9.99301	b1263, b3844, b4117, b0010, b3927, b1380	ACt2rpp, ANPRT, ANS, ARGDC, FADRx, FE3Ri, FLVRx, GLYALDtpp, GLYtpp, LDH_D, UREAtpp
251	-58.9846	EX_succ_e	7.97599	-7.5	0.157559	6	34.9228	-10.6764	-2.79929	27.7291	9.99301	b1264, b3844, b0010, b4115, b3927, b1380	ACt2rpp, ANS, ARGAGMt7pp, FADRx, FE3Ri, FLVRx, GLYALDtpp, GLYtpp, LDH_D, UREAtpp
252	-58.9846	EX_succ_e	7.97599	-7.5	0.157559	6	34.9228	-10.6764	-2.79929	27.7291	9.99301	b3844, b0010, b2223, b4115, b3927, b1380	ACACt2pp, ACt2rpp, ARGAGMt7pp, BUTt2rpp, FADRx, FE3Ri, FLVRx, GLYALDtpp, GLYtpp, HEXt2rpp, LDH_D, UREAtpp
253	-58.9846	EX_succ_e	7.97599	-7.5	0.157559	6	34.9228	-10.6764	-2.79929	27.7291	9.99301	b3844, b4117, b0010, b3927, b1380, b2670	ACt2rpp, ALAtpp, ARGDC, FADRx, FE3Ri, FLVRx, GLYALDtpp, GLYtpp, LDH_D, UREAtpp
254	-58.9846	EX_succ_e	7.97599	-7.5	0.157559	6	34.9228	-10.6764	-2.79929	27.7291	9.99301	b3844, b0732, b4117, b0010, b3927, b1380	ACt2rpp, ARGDC, FADRx, FE3Ri, FLVRx, GLYALDtpp, GLYtpp, LDH_D, MANPGH, UREAtpp
255	-58.9846	EX_succ_e	7.97599	-7.5	0.157559	6	34.9228	-10.6764	-2.79929	27.7291	9.99301	b3844, b0010, b2417, b4115, b3927, b1380	ACMUMptspp, ACt2rpp, ARGAGMt7pp, FADRx, FE3Ri, FLVRx, GLYALDtpp, GLYtpp, LDH_D, MALTptspp, SUCptspp, TREptspp, UREAtpp
256	-58.9846	EX_succ_e	7.97599	-7.5	0.157559	6	34.9228	-10.6764	-2.79929	27.7291	9.99301	b3844, b3425, b0010, b4115, b3927, b1380	ACt2rpp, ARGAGMt7pp, FADRx, FE3Ri, FLVRx, GLYALDtpp, GLYtpp, LDH_D, UREAtpp
257	-58.9846	EX_succ_e	7.97599	-7.5	0.157559	6	34.9228	-10.6764	-2.79929	27.7291	9.99301	b3844, b1907, b0010, b4115, b3927, b1380	ACt2rpp, ARGAGMt7pp, FADRx, FE3Ri, FLVRx, GLYALDtpp, GLYtpp, LDH_D, UREAtpp
258	-58.9846	EX_succ_e	7.97599	-7.5	0.157559	6	34.9228	-10.6764	-2.79929	27.7291	9.99301	b2901, b3844, b0010, b4115, b3927, b1380	ACt2rpp, ARGAGMt7pp, FADRx, FE3Ri, FLVRx, GLYALDtpp, GLYtpp, LDH_D, UREAtpp
259	-58.9846	EX_succ_e	7.97599	-7.5	0.157559	6	34.9228	-10.6764	-2.79929	27.7291	9.99301	b3844, b0010, b4115, b3927, b1380, b2033	ACt2rpp, ARGAGMt7pp, FADRx, FE3Ri, FLVRx, GLYALDtpp, GLYtpp, LDH_D, O16AT, UREAtpp
260	-58.9846	EX_succ_e	7.97599	-7.5	0.157559	6	34.9228	-10.6764	-2.79929	27.7291	9.99301	b3844, b3908, b0010, b4115, b3927, b1380	ACt2rpp, ARGAGMt7pp, FADRx, FE3Ri, FLVRx, GLYALDtpp, GLYtpp, LDH_D, UREAtpp
261	-58.9846	EX_succ_e	7.97599	-7.5	0.157559	6	34.9228	-10.6764	-2.79929	27.7291	9.99301	b3844, b0010, b4115, b1442, b3927, b1380	ACt2rpp, ARGAGMt7pp, FADRx, FE3Ri, FLVRx, GLYALDtpp, GLYtpp, LDH_D, UREAtpp
262	-58.9846	EX_succ_e	7.97599	-7.5	0.157559	6	34.9228	-10.6764	-2.79929	27.7291	9.99301	b3844, b4117, b0010, b0936, b3927, b1380	ACt2rpp, ARGDC, ETHSO3abcpp, FADRx, FE3Ri, FLVRx, GLYALDtpp, GLYtpp, LDH_D, MSO3abcpp, SULFACabcpp, UREAtpp
263	-58.9846	EX_succ_e	7.97599	-7.5	0.157559	6	34.9228	-10.6764	-2.79929	27.7291	9.99301	b3844, b0010, b4115, b3927, b1380, b3966	ACt2rpp, ADOCBLtonex, ARGAGMt7pp, CBItonex, CBL1tonex, FADRx, FE3Ri, FLVRx, GLYALDtpp, GLYtpp, LDH_D, UREAtpp
264	-58.9846	EX_succ_e	7.97599	-7.5	0.157559	6	34.9228	-10.6764	-2.79929	27.7291	9.99301	b3844, b4117, b0010, b1981, b3927, b1380	ACt2rpp, ARGDC, FADRx, FE3Ri, FLVRx, GLYALDtpp, GLYtpp, LDH_D, SKMt2pp, UREAtpp
265	-58.9846	EX_succ_e	7.97599	-7.5	0.157559	6	34.9228	-10.6764	-2.79929	27.7291	9.99301	b3844, b0010, b4115, b3927, b1380, b2164	ACt2rpp, ARGAGMt7pp, FADRx, FE3Ri, FLVRx, GLYALDtpp, GLYtpp, LDH_D, PSURItpp, UREAtpp
266	-58.9846	EX_succ_e	7.97599	-7.5	0.157559	6	34.9228	-10.6764	-2.79929	27.7291	9.99301	b3844, b0010, b4115, b4085, b3927, b1380	ACt2rpp, ALLULPE, ARGAGMt7pp, FADRx, FE3Ri, FLVRx, GLYALDtpp, GLYtpp, LDH_D, UREAtpp
267	-58.9846	EX_succ_e	7.97599	-7.5	0.157559	6	34.9228	-10.6764	-2.79929	27.7291	9.99301	b3844, b0010, b2423, b4115, b3927, b1380	ACt2rpp, ARGAGMt7pp, FADRx, FE3Ri, FLVRx, GLYALDtpp, GLYtpp, LDH_D, SELabcpp, SLNTabcpp, TSULabcpp, UREAtpp
268	-58.9846	EX_succ_e	7.97599	-7.5	0.157559	6	34.9228	-10.6764	-2.79929	27.7291	9.99301	b3844, b4117, b1805, b0010, b3927, b1380	ACt2rpp, ARGDC, FADRx, FE3Ri, FLVRx, GLYALDtpp, GLYtpp, LDH_D, UREAtpp
269	-58.9846	EX_succ_e	7.97599	-7.5	0.157559	6	34.9228	-10.6764	-2.79929	27.7291	9.99301	b3844, b4117, b0010, b3571, b3927, b1380	AAMYLpp, ACt2rpp, ARGDC, FADRx, FE3Ri, FLVRx, GLYALDtpp, GLYtpp, LDH_D, UREAtpp
270	-58.9846	EX_succ_e	7.97599	-7.5	0.157559	6	34.9228	-10.6764	-2.79929	27.7291	9.99301	b2930, b3844, b0010, b4115, b3927, b1380	ACt2rpp, ARGAGMt7pp, FADRx, FE3Ri, FLVRx, GLYALDtpp, GLYtpp, LDH_D, UREAtpp
271	-58.9846	EX_succ_e	7.97599	-7.5	0.157559	6	34.9228	-10.6764	-2.79929	27.7291	9.99301	b3844, b4117, b0010, b2487, b3927, b1380	ACt2rpp, ARGDC, FADRx, FE3Ri, FLVRx, GLYALDtpp, GLYtpp, LDH_D, UREAtpp
272	-58.9846	EX_succ_e	7.97599	-7.5	0.157559	6	34.9228	-10.6764	-2.79929	27.7291	9.99301	b0896, b3844, b4117, b0010, b3927, b1380	ACt2rpp, ARGDC, DMSOR2, FADRx, FE3Ri, FLVRx, GLYALDtpp, GLYtpp, LDH_D, TMAOR2, UREAtpp
273	-58.9846	EX_succ_e	7.97599	-7.5	0.157559	6	34.9228	-10.6764	-2.79929	27.7291	9.99301	b3844, b0010, b4115, b3927, b1380, b4096	ACt2rpp, ARGAGMt7pp, ARMEPNS, FADRx, FE3Ri, FLVRx, GLYALDtpp, GLYtpp, LDH_D, UREAtpp
274	-58.9846	EX_succ_e	7.97599	-7.5	0.157559	6	34.9228	-10.6764	-2.79929	27.7291	9.99301	b3844, b4117, b0010, b3927, b1380, b3182	ACt2rpp, ARGDC, FADRx, FE3Ri, FLVRx, GLYALDtpp, GLYtpp, LDH_D, UREAtpp
275	-58.9846	EX_succ_e	7.97599	-7.5	0.157559	6	34.9228	-10.6764	-2.79929	27.7291	9.99301	b3844, b4117, b0010, b3927, b1380, b1006	ACt2rpp, ARGDC, FADRx, FE3Ri, FLVRx, GLYALDtpp, GLYtpp, LDH_D, UREAtpp
276	-58.9846	EX_succ_e	7.97599	-7.5	0.157559	6	34.9228	-10.6764	-2.79929	27.7291	9.99301	b3844, b4117, b0010, b4195, b3927, b1380	ACt2rpp, ARGDC, ASCBptspp, FADRx, FE3Ri, FLVRx, GLYALDtpp, GLYtpp, LDH_D, UREAtpp
277	-58.9846	EX_succ_e	7.97599	-7.5	0.157559	6	34.9228	-10.6764	-2.79929	27.7291	9.99301	b3844, b4117, b0010, b3927, b1380, b1677	ACt2rpp, ALPATE160pp, ALPATG160pp, ARGDC, FADRx, FE3Ri, FLVRx, GLYALDtpp, GLYtpp, LDH_D, UREAtpp
278	-58.9846	EX_succ_e	7.97599	-7.5	0.157559	6	34.9228	-10.6764	-2.79929	27.7291	9.99301	b3844, b1992, b4117, b0010, b3927, b1380	ACt2rpp, ADOCBLS, ARGDC, FADRx, FE3Ri, FLVRx, GLYALDtpp, GLYtpp, LDH_D, UREAtpp
279	-58.9846	EX_succ_e	7.97599	-7.5	0.157559	6	34.9228	-10.6764	-2.79929	27.7291	9.99301	b3844, b4117, b0010, b1244, b3927, b1380	ACt2rpp, ARGDC, FADRx, FE3Ri, FLVRx, GLYALDtpp, GLYtpp, LDH_D, UREAtpp
280	-58.9846	EX_succ_e	7.97599	-7.5	0.157559	6	34.9228	-10.6764	-2.79929	27.7291	9.99301	b3844, b0980, b0010, b4115, b3927, b1380	ACt2rpp, ARGAGMt7pp, FADRx, FE3Ri, FLVRx, GLYALDtpp, GLYtpp, LDH_D, NTP3pp, PHYTSpp, UREAtpp
281	-58.9846	EX_succ_e	7.97599	-7.5	0.157559	6	34.9228	-10.6764	-2.79929	27.7291	9.99301	b3844, b4117, b0010, b3927, b1380, b0839	ACt2rpp, ARGDC, FADRx, FE3Ri, FLVRx, GLYALDtpp, GLYtpp, LDH_D, UREAtpp
282	-58.9846	EX_succ_e	7.97599	-7.5	0.157559	6	34.9228	-10.6764	-2.79929	27.7291	9.99301	b3844, b2937, b0010, b4115, b3927, b1380	ACt2rpp, AGMT, ARGAGMt7pp, FADRx, FE3Ri, FLVRx, GLYALDtpp, GLYtpp, LDH_D, UREAtpp
283	-58.9846	EX_succ_e	7.97599	-7.5	0.157559	6	34.9228	-10.6764	-2.79929	27.7291	9.99301	b3844, b4117, b0010, b2027, b3927, b1380	ACt2rpp, ARGDC, FADRx, FE3Ri, FLVRx, GLYALDtpp, GLYtpp, LDH_D, O16AP1pp, O16AP2pp, O16AP3pp, UREAtpp
284	-58.9846	EX_succ_e	7.97599	-7.5	0.157559	6	34.9228	-10.6764	-2.79929	27.7291	9.99301	b3844, b4117, b0010, b3927, b1380, b2813	ACt2rpp, ARGDC, FADRx, FE3Ri, FLVRx, GLYALDtpp, GLYtpp, LDH_D, UREAtpp
285	-58.9846	EX_succ_e	7.97599	-7.5	0.157559	6	34.9228	-10.6764	-2.79929	27.7291	9.99301	b3844, b4146, b4117, b0010, b3927, b1380	ACt2rpp, ARGDC, FADRx, FE3Ri, FLVRx, GLYALDtpp, GLYtpp, LDH_D, LYSAM, UREAtpp
286	-58.9846	EX_succ_e	7.97599	-7.5	0.157559	6	34.9228	-10.6764	-2.79929	27.7291	9.99301	b3844, b2788, b0010, b4115, b3927, b1380	ACt2rpp, ARGAGMt7pp, FADRx, FE3Ri, FLVRx, GLYALDtpp, GLYtpp, LDH_D, UREAtpp
287	-58.9846	EX_succ_e	7.97599	-7.5	0.157559	6	34.9228	-10.6764	-2.79929	27.7291	9.99301	b2036, b3844, b4117, b0010, b3927, b1380	ACt2rpp, ARGDC, FADRx, FE3Ri, FLVRx, GLYALDtpp, GLYtpp, LDH_D, UDPGALM, UREAtpp
288	-58.9846	EX_succ_e	7.97599	-7.5	0.157559	6	34.9228	-10.6764	-2.79929	27.7291	9.99301	b3844, b4117, b0010, b3927, b1380, b1661	ACt2rpp, ARGDC, CFAS160E, CFAS160G, CFAS180E, CFAS180G, FADRx, FE3Ri, FLVRx, GLYALDtpp, GLYtpp, LDH_D, UREAtpp
289	-58.9846	EX_succ_e	7.97599	-7.5	0.157559	6	34.9228	-10.6764	-2.79929	27.7291	9.99301	b3844, b4117, b0010, b4086, b3927, b1380	ACt2rpp, ALLabcpp, ARGDC, FADRx, FE3Ri, FLVRx, GLYALDtpp, GLYtpp, LDH_D, UREAtpp
290	-58.9846	EX_succ_e	7.97599	-7.5	0.157559	6	34.9228	-10.6764	-2.79929	27.7291	9.99301	b3844, b4117, b0010, b3749, b3927, b1380	ACt2rpp, ARGDC, FADRx, FE3Ri, FLVRx, GLYALDtpp, GLYtpp, LDH_D, UREAtpp
291	-58.9846	EX_succ_e	7.97599	-7.5	0.157559	6	34.9228	-10.6764	-2.79929	27.7291	9.99301	b3844, b4117, b0010, b3927, b1380, b2794	ACt2rpp, ARGDC, CDGR, FADRx, FE3Ri, FLVRx, GLYALDtpp, GLYtpp, LDH_D, UREAtpp
292	-58.9846	EX_succ_e	7.97599	-7.5	0.157559	6	34.9228	-10.6764	-2.79929	27.7291	9.99301	b3844, b0010, b4115, b0856, b3927, b1380	ACt2rpp, ARGAGMt7pp, FADRx, FE3Ri, FLVRx, GLYALDtpp, GLYtpp, LDH_D, UREAtpp
293	-58.9846	EX_succ_e	7.97599	-7.5	0.157559	6	34.9228	-10.6764	-2.79929	27.7291	9.99301	b3844, b4117, b2539, b0010, b3927, b1380	ACt2rpp, ARGDC, CINNDO, FADRx, FE3Ri, FLVRx, GLYALDtpp, GLYtpp, LDH_D, PPPNDO, UREAtpp
294	-58.9846	EX_succ_e	7.97599	-7.5	0.157559	6	34.9228	-10.6764	-2.79929	27.7291	9.99301	b3844, b0010, b4115, b3927, b1380, b3208	ACt2rpp, ARGAGMt7pp, FADRx, FE3Ri, FLVRx, GLYALDtpp, GLYtpp, LDH_D, UREAtpp
295	-58.9846	EX_succ_e	7.97599	-7.5	0.157559	6	34.9228	-10.6764	-2.79929	27.7291	9.99301	b3844, b3581, b0010, b4115, b3927, b1380	ACt2rpp, ARGAGMt7pp, FADRx, FE3Ri, FLVRx, GLYALDtpp, GLYtpp, LDH_D, UREAtpp
296	-58.9846	EX_succ_e	7.97599	-7.5	0.157559	6	34.9228	-10.6764	-2.79929	27.7291	9.99301	b3844, b4117, b0010, b3605, b3927, b1380	ACt2rpp, ARGDC, FADRx, FE3Ri, FLVRx, GLYALDtpp, GLYtpp, LDH_D, UREAtpp
297	-58.9846	EX_succ_e	7.97599	-7.5	0.157559	6	34.9228	-10.6764	-2.79929	27.7291	9.99301	b3844, b0010, b4115, b3927, b1380, b3880	ACt2rpp, ARGAGMt7pp, FADRx, FE3Ri, FLVRx, GLYALDtpp, GLYtpp, LDH_D, SQVOSI, UREAtpp
298	-58.9846	EX_succ_e	7.97599	-7.5	0.157559	6	34.9228	-10.6764	-2.79929	27.7291	9.99301	b3844, b4117, b3946, b0010, b3927, b1380	ACt2rpp, ARGDC, FADRx, FE3Ri, FLVRx, GLYALDtpp, GLYtpp, LDH_D, UREAtpp
299	-58.9846	EX_succ_e	7.97599	-7.5	0.157559	6	34.9228	-10.6764	-2.79929	27.7291	9.99301	b3844, b3582, b0010, b4115, b3927, b1380	ACt2rpp, ARGAGMt7pp, FADRx, FE3Ri, FLVRx, GLYALDtpp, GLYtpp, LDH_D, UREAtpp
300	-58.9846	EX_succ_e	7.97599	-7.5	0.157559	6	34.9228	-10.6764	-2.79929	27.7291	9.99301	b3844, b0010, b4115, b3477, b3927, b1380	ACt2rpp, ARGAGMt7pp, FADRx, FE3Ri, FLVRx, GLYALDtpp, GLYtpp, LDH_D, UREAtpp
301	-58.9846	EX_succ_e	7.97599	-7.5	0.157559	6	34.9228	-10.6764	-2.79929	27.7291	9.99301	b3844, b2521, b0010, b4115, b3927, b1380	ACt2rpp, ARGAGMt7pp, FADRx, FE3Ri, FLVRx, GLYALDtpp, GLYtpp, LDH_D, MCPST, UREAtpp
302	-58.9846	EX_succ_e	7.97599	-7.5	0.157559	6	34.9228	-10.6764	-2.79929	27.7291	9.99301	b3844, b4117, b0010, b3927, b1380, b0783	ACt2rpp, ARGDC, CPMPS, FADRx, FE3Ri, FLVRx, GLYALDtpp, GLYtpp, LDH_D, UREAtpp
303	-58.9846	EX_succ_e	7.97599	-7.5	0.157559	6	34.9228	-10.6764	-2.79929	27.7291	9.99301	b3844, b4117, b0010, b0509, b3927, b1380	ACt2rpp, ARGDC, FADRx, FE3Ri, FLVRx, GLYALDtpp, GLYtpp, LDH_D, UREAtpp
304	-58.9846	EX_succ_e	7.97599	-7.5	0.157559	6	34.9228	-10.6764	-2.79929	27.7291	9.99301	b3844, b4117, b0010, b3927, b2303, b1380	ACt2rpp, ARGDC, DHPTPE, FADRx, FE3Ri, FLVRx, GLYALDtpp, GLYtpp, LDH_D, UREAtpp
305	-58.9846	EX_succ_e	7.97599	-7.5	0.157559	6	34.9228	-10.6764	-2.79929	27.7291	9.99301	b3844, b4117, b0010, b3927, b1380, b2134	ACt2rpp, ARGDC, FADRx, FE3Ri, FLVRx, GLYALDtpp, GLYtpp, LDH_D, UREAtpp
306	-58.9846	EX_succ_e	7.97599	-7.5	0.157559	6	34.9228	-10.6764	-2.79929	27.7291	9.99301	b3844, b0010, b4115, b1469, b3927, b1380	ACt2rpp, ARGAGMt7pp, FADRx, FE3Ri, FLVRx, GLYALDtpp, GLYtpp, LDH_D, UREAtpp
307	-58.9846	EX_succ_e	7.97599	-7.5	0.157559	6	34.9228	-10.6764	-2.79929	27.7291	9.99301	b3588, b3844, b0010, b4115, b3927, b1380	ACt2rpp, ARGAGMt7pp, FADRx, FE3Ri, FLVRx, GLYALDtpp, GLYtpp, LDH_D, UREAtpp
308	-58.9846	EX_succ_e	7.97599	-7.5	0.157559	6	34.9228	-10.6764	-2.79929	27.7291	9.99301	b3844, b4117, b0010, b3927, b1380, b3943	ACt2rpp, ARGDC, CYSItpp, FADRx, FE3Ri, FLVRx, GLYALDtpp, GLYtpp, LDH_D, UREAtpp
309	-58.9846	EX_succ_e	7.97599	-7.5	0.157559	6	34.9228	-10.6764	-2.79929	27.7291	9.99301	b3844, b4117, b0010, b3927, b1380, b4159	ACt2rpp, ARGDC, FADRx, FE3Ri, FLVRx, GLYALDtpp, GLYtpp, LDH_D, UREAtpp
310	-58.9846	EX_succ_e	7.97599	-7.5	0.157559	6	34.9228	-10.6764	-2.79929	27.7291	9.99301	b3844, b2104, b0010, b4115, b3927, b1380	ACt2rpp, ARGAGMt7pp, FADRx, FE3Ri, FLVRx, GLYALDtpp, GLYtpp, HETZK, LDH_D, UREAtpp
311	-58.9846	EX_succ_e	7.97599	-7.5	0.157559	6	34.9228	-10.6764	-2.79929	27.7291	9.99301	b3844, b4117, b3551, b0010, b3927, b1380	ACt2rpp, ARGDC, BSORx, BSORy, FADRx, FE3Ri, FLVRx, GLYALDtpp, GLYtpp, LDH_D, UREAtpp
312	-58.9846	EX_succ_e	7.97599	-7.5	0.157559	6	34.9228	-10.6764	-2.79929	27.7291	9.99301	b3844, b4117, b0010, b3927, b1380, b1022	ACt2rpp, ARGDC, FADRx, FE3Ri, FLVRx, GLYALDtpp, GLYtpp, LDH_D, PUACGAMS, PUACGAMtr, UREAtpp
313	-58.9846	EX_succ_e	7.97599	-7.5	0.157559	6	34.9228	-10.6764	-2.79929	27.7291	9.99301	b3844, b4198, b0010, b4115, b3927, b1380	ACt2rpp, ARGAGMt7pp, FADRx, FE3Ri, FLVRx, GLYALDtpp, GLYtpp, LDH_D, UREAtpp
314	-58.9846	EX_succ_e	7.97599	-7.5	0.157559	6	34.9228	-10.6764	-2.79929	27.7291	9.99301	b3844, b4117, b0010, b3127, b3927, b1380	ACt2rpp, ARGDC, FADRx, FE3Ri, FLVRx, GLYALDtpp, GLYtpp, LDH_D, UREAtpp
315	-58.9846	EX_succ_e	7.97599	-7.5	0.157559	6	34.9228	-10.6764	-2.79929	27.7291	9.99301	b3844, b4117, b2361, b0010, b3927, b1380	ACt2rpp, ARGDC, FADRx, FE3Ri, FLVRx, GLYALDtpp, GLYtpp, LDH_D, UREAtpp
316	-58.9846	EX_succ_e	7.97599	-7.5	0.157559	6	34.9228	-10.6764	-2.79929	27.7291	9.99301	b3844, b2668, b0010, b4115, b3927, b1380	ACt2rpp, ARGAGMt7pp, FADRx, FE3Ri, FLVRx, GLYALDtpp, GLYtpp, LDH_D, UREAtpp
317	-58.9846	EX_succ_e	7.97599	-7.5	0.157559	6	34.9228	-10.6764	-2.79929	27.7291	9.99301	b3844, b4117, b3397, b0010, b3927, b1380	ACt2rpp, ARGDC, FADRx, FE3Ri, FLVRx, GLYALDtpp, GLYtpp, LDH_D, UREAtpp
318	-58.9846	EX_succ_e	7.97599	-7.5	0.157559	6	34.9228	-10.6764	-2.79929	27.7291	9.99301	b3844, b0010, b4115, b3927, b1380, b4298	ACt2rpp, ARGAGMt7pp, FADRx, FE3Ri, FLVRx, GLYALDtpp, GLYtpp, LDH_D, UREAtpp
319	-58.9846	EX_succ_e	7.97599	-7.5	0.157559	6	34.9228	-10.6764	-2.79929	27.7291	9.99301	b3844, b4117, b0010, b4193, b3927, b1380	ACt2rpp, ARGDC, ASCBptspp, FADRx, FE3Ri, FLVRx, GLYALDtpp, GLYtpp, LDH_D, UREAtpp
320	-58.9846	EX_succ_e	7.97599	-7.5	0.157559	6	34.9228	-10.6764	-2.79929	27.7291	9.99301	b3844, b0010, b4115, b2485, b3927, b1380	ACt2rpp, ARGAGMt7pp, FADRx, FE3Ri, FLVRx, GLYALDtpp, GLYtpp, LDH_D, UREAtpp
321	-58.9846	EX_succ_e	7.97599	-7.5	0.157559	6	34.9228	-10.6764	-2.79929	27.7291	9.99301	b3844, b4117, b0010, b3907, b3927, b1380	ACt2rpp, ARGDC, FADRx, FE3Ri, FLVRx, GLYALDtpp, GLYtpp, LDH_D, LYXt2pp, RMNtpp, UREAtpp
322	-58.9846	EX_succ_e	7.97599	-7.5	0.157559	6	34.9228	-10.6764	-2.79929	27.7291	9.99301	b3844, b4117, b1704, b0010, b3927, b1380	ACt2rpp, ARGDC, FADRx, FE3Ri, FLVRx, GLYALDtpp, GLYtpp, LDH_D, UREAtpp
323	-58.9846	EX_succ_e	7.97599	-7.5	0.157559	6	34.9228	-10.6764	-2.79929	27.7291	9.99301	b3844, b4117, b3589, b0010, b3927, b1380	ACt2rpp, ARGDC, FADRx, FE3Ri, FLVRx, GLYALDtpp, GLYtpp, LDH_D, UREAtpp
324	-58.9846	EX_succ_e	7.97599	-7.5	0.157559	6	34.9228	-10.6764	-2.79929	27.7291	9.99301	b3844, b4117, b0010, b3927, b1380, b2174	ACt2rpp, ARGDC, COLIPAKpp, FADRx, FE3Ri, FLVRx, GLYALDtpp, GLYtpp, LDH_D, UREAtpp
325	-58.9846	EX_succ_e	7.97599	-7.5	0.157559	6	34.9228	-10.6764	-2.79929	27.7291	9.99301	b0446, b3844, b0010, b4115, b3927, b1380	ACt2rpp, ARGAGMt7pp, FADRx, FE3Ri, FLVRx, GLYALDtpp, GLYtpp, LDH_D, UREAtpp
326	-58.9846	EX_succ_e	7.97599	-7.5	0.157559	6	34.9228	-10.6764	-2.79929	27.7291	9.99301	b3844, b4117, b0010, b2481, b3927, b1380	ACt2rpp, ARGDC, FADRx, FE3Ri, FLVRx, GLYALDtpp, GLYtpp, LDH_D, UREAtpp
327	-58.9846	EX_succ_e	7.97599	-7.5	0.157559	6	34.9228	-10.6764	-2.79929	27.7291	9.99301	b3844, b0010, b4115, b3927, b1380, b3241	4HBZt3pp, ACt2rpp, ARGAGMt7pp, FADRx, FE3Ri, FLVRx, GLYALDtpp, GLYtpp, LDH_D, UREAtpp
328	-58.9846	EX_succ_e	7.97599	-7.5	0.157559	6	34.9228	-10.6764	-2.79929	27.7291	9.99301	b3844, b4117, b0010, b4230, b3927, b1380	ACt2rpp, ARGDC, FADRx, FE3Ri, FLVRx, GLYALDtpp, GLYtpp, LDH_D, UREAtpp
329	-58.9846	EX_succ_e	7.97599	-7.5	0.157559	6	34.9228	-10.6764	-2.79929	27.7291	9.99301	b3844, b0010, b4115, b2719, b3927, b1380	ACt2rpp, ARGAGMt7pp, FADRx, FE3Ri, FLVRx, GLYALDtpp, GLYtpp, LDH_D, UREAtpp
330	-58.9846	EX_succ_e	7.97599	-7.5	0.157559	6	34.9228	-10.6764	-2.79929	27.7291	9.99301	b3844, b4117, b0010, b3224, b3927, b1380	ACNAMt2pp, ACt2rpp, ARGDC, FADRx, FE3Ri, FLVRx, GLYALDtpp, GLYtpp, LDH_D, UREAtpp
331	-58.9846	EX_succ_e	7.97599	-7.5	0.157559	6	34.9228	-10.6764	-2.79929	27.7291	9.99301	b1732, b3844, b0010, b4115, b3927, b1380	ACt2rpp, ARGAGMt7pp, FADRx, FE3Ri, FLVRx, GLYALDtpp, GLYtpp, LDH_D, UREAtpp
332	-58.9846	EX_succ_e	7.97599	-7.5	0.157559	6	34.9228	-10.6764	-2.79929	27.7291	9.99301	b3844, b0002, b4117, b0010, b3927, b1380	ACt2rpp, ARGDC, FADRx, FE3Ri, FLVRx, GLYALDtpp, GLYtpp, LDH_D, UREAtpp
333	-58.9846	EX_succ_e	7.97599	-7.5	0.157559	6	34.9228	-10.6764	-2.79929	27.7291	9.99301	b3844, b4117, b0010, b3927, b1380, b2710	ACt2rpp, ARGDC, FADRx, FE3Ri, FLVRx, GLYALDtpp, GLYtpp, LDH_D, NHFRBO, UREAtpp
334	-58.9846	EX_succ_e	7.97599	-7.5	0.157559	6	34.9228	-10.6764	-2.79929	27.7291	9.99301	b3670, b3844, b0010, b4115, b3927, b1380	ACt2rpp, ARGAGMt7pp, FADRx, FE3Ri, FLVRx, GLYALDtpp, GLYtpp, LDH_D, UREAtpp
335	-58.9846	EX_succ_e	7.97599	-7.5	0.157559	6	34.9228	-10.6764	-2.79929	27.7291	9.99301	b3844, b4117, b3875, b0010, b3927, b1380	ACt2rpp, ARGDC, DHPStex, FADRx, FE3Ri, FLVRx, GLYALDtpp, GLYtpp, LDH_D, SQtex, UREAtpp
336	-58.9846	EX_succ_e	7.97599	-7.5	0.157559	6	34.9228	-10.6764	-2.79929	27.7291	9.99301	b3844, b0010, b4115, b3927, b1380, b1025	ACt2rpp, ARGAGMt7pp, FADRx, FE3Ri, FLVRx, GLYALDtpp, GLYtpp, LDH_D, UREAtpp
337	-58.9846	EX_succ_e	7.97599	-7.5	0.157559	6	34.9228	-10.6764	-2.79929	27.7291	9.99301	b3844, b4117, b0010, b3927, b1380, b3488	ACt2rpp, ARGDC, FADRx, FE3Ri, FLVRx, GLYALDtpp, GLYtpp, INOSTO, LDH_D, UREAtpp
338	-58.9846	EX_succ_e	7.97599	-7.5	0.157559	6	34.9228	-10.6764	-2.79929	27.7291	9.99301	b3844, b0010, b4115, b2255, b3927, b1380	ACt2rpp, ARGAGMt7pp, FADRx, FE3Ri, FLVRx, GLYALDtpp, GLYtpp, LDH_D, UDPGDC, ULA4NFT, UREAtpp
339	-58.9846	EX_succ_e	7.97599	-7.5	0.157559	6	34.9228	-10.6764	-2.79929	27.7291	9.99301	b3844, b4117, b0010, b3390, b3927, b1380	ACt2rpp, ARGDC, FADRx, FE3Ri, FLVRx, GLYALDtpp, GLYtpp, LDH_D, UREAtpp
340	-58.9846	EX_succ_e	7.97599	-7.5	0.157559	6	34.9228	-10.6764	-2.79929	27.7291	9.99301	b3844, b0010, b4115, b2344, b3927, b1380	ACt2rpp, ARGAGMt7pp, DDCAtexi, FADRx, FE3Ri, FLVRx, GLYALDtpp, GLYtpp, HDCAtexi, HDCEAtexi, LDH_D, OCDCAtexi, OCDCEAtexi, TTDCAtexi, TTDCEAtexi, UREAtpp
341	-58.9846	EX_succ_e	7.97599	-7.5	0.157559	6	34.9228	-10.6764	-2.79929	27.7291	9.99301	b3844, b3428, b0010, b4115, b3927, b1380	ACt2rpp, ARGAGMt7pp, FADRx, FE3Ri, FLVRx, GLYALDtpp, GLYtpp, LDH_D, UREAtpp
342	-58.9846	EX_succ_e	7.97599	-7.5	0.157559	6	34.9228	-10.6764	-2.79929	27.7291	9.99301	b3844, b0010, b4115, b3927, b1380, b2480	ACt2rpp, ARGAGMt7pp, FADRx, FE3Ri, FLVRx, GLYALDtpp, GLYtpp, LDH_D, UREAtpp
343	-58.9846	EX_succ_e	7.97599	-7.5	0.157559	6	34.9228	-10.6764	-2.79929	27.7291	9.99301	b3844, b4117, b3475, b0010, b3927, b1380	ACt2rpp, ARGDC, FADRx, FE3Ri, FLVRx, GLYALDtpp, GLYtpp, LDH_D, UREAtpp
344	-58.9846	EX_succ_e	7.97599	-7.5	0.157559	6	34.9228	-10.6764	-2.79929	27.7291	9.99301	b4269, b3844, b4117, b0010, b3927, b1380	ACt2rpp, ARGDC, FADRx, FE3Ri, FLVRx, GLYALDtpp, GLYtpp, LDH_D, UREAtpp
345	-58.9846	EX_succ_e	7.97599	-7.5	0.157559	6	34.9228	-10.6764	-2.79929	27.7291	9.99301	b3844, b0010, b4115, b3927, b2146, b1380	ACt2rpp, ARGAGMt7pp, DURADx, FADRx, FE3Ri, FLVRx, GLYALDtpp, GLYtpp, LDH_D, UREAtpp
346	-58.9846	EX_succ_e	7.97599	-7.5	0.157559	6	34.9228	-10.6764	-2.79929	27.7291	9.99301	b3844, b4117, b0010, b3374, b3927, b1380	ACt2rpp, ARGDC, FADRx, FE3Ri, FLVRx, FRULYSK, GLYALDtpp, GLYtpp, LDH_D, UREAtpp
347	-58.9846	EX_succ_e	7.97599	-7.5	0.157559	6	34.9228	-10.6764	-2.79929	27.7291	9.99301	b3844, b4117, b0010, b3927, b1380, b2873	ACt2rpp, ARGDC, FADRx, FE3Ri, FLVRx, GLYALDtpp, GLYtpp, LDH_D, PHDA, UREAtpp
348	-58.9846	EX_succ_e	7.97599	-7.5	0.157559	6	34.9228	-10.6764	-2.79929	27.7291	9.99301	b3844, b4117, b0010, b0864, b3927, b1380	ACt2rpp, ARGDC, FADRx, FE3Ri, FLVRx, GLYALDtpp, GLYtpp, LDH_D, UREAtpp
349	-58.9846	EX_succ_e	7.97599	-7.5	0.157559	6	34.9228	-10.6764	-2.79929	27.7291	9.99301	b3844, b4117, b0010, b2720, b3927, b1380	ACt2rpp, ARGDC, FADRx, FE3Ri, FLVRx, GLYALDtpp, GLYtpp, LDH_D, UREAtpp
350	-58.9846	EX_succ_e	7.97599	-7.5	0.157559	6	34.9228	-10.6764	-2.79929	27.7291	9.99301	b3844, b4117, b0010, b3927, b0070, b1380	ACt2rpp, ARGDC, FADRx, FE3Ri, FLVRx, GLYALDtpp, GLYtpp, LDH_D, UREAtpp
351	-58.9846	EX_succ_e	7.97599	-7.5	0.157559	6	34.9228	-10.6764	-2.79929	27.7291	9.99301	b3844, b4117, b2251, b0010, b3927, b1380	ACt2rpp, ARGDC, FADRx, FE3Ri, FLVRx, GLYALDtpp, GLYtpp, LDH_D, UREAtpp
352	-58.9846	EX_succ_e	7.97599	-7.5	0.157559	6	34.9228	-10.6764	-2.79929	27.7291	9.99301	b3844, b4117, b1646, b0010, b3927, b1380	ACt2rpp, ARGDC, FADRx, FE3Ri, FLVRx, GLYALDtpp, GLYtpp, LDH_D, SPODMpp, UREAtpp
353	-58.9846	EX_succ_e	7.97599	-7.5	0.157559	6	34.9228	-10.6764	-2.79929	27.7291	9.99301	b1478, b3844, b4117, b0010, b3927, b1380	ACt2rpp, ARGDC, FADRx, FE3Ri, FLVRx, GLYALDtpp, GLYtpp, LDH_D, UREAtpp
354	-58.9846	EX_succ_e	7.97599	-7.5	0.157559	6	34.9228	-10.6764	-2.79929	27.7291	9.99301	b2518, b3844, b4117, b0010, b3927, b1380	ACt2rpp, ARGDC, FADRx, FE3Ri, FLVRx, GLYALDtpp, GLYtpp, LDH_D, UREAtpp
355	-58.9846	EX_succ_e	7.97599	-7.5	0.157559	6	34.9228	-10.6764	-2.79929	27.7291	9.99301	b3844, b4117, b2215, b0010, b3927, b1380	ACt2rpp, ARGDC, FADRx, FE3Ri, FLVRx, GLYALDtpp, GLYtpp, LDH_D, UREAtpp
356	-58.9846	EX_succ_e	7.97599	-7.5	0.157559	6	34.9228	-10.6764	-2.79929	27.7291	9.99301	b3844, b0010, b4115, b2578, b3927, b1380	ACt2rpp, ARGAGMt7pp, FADRx, FE3Ri, FLVRx, GLYALDtpp, GLYtpp, LDH_D, UREAtpp
357	-58.9846	EX_succ_e	7.97599	-7.5	0.157559	6	34.9228	-10.6764	-2.79929	27.7291	9.99301	b3844, b0010, b4115, b3772, b3927, b1380	ACt2rpp, ARGAGMt7pp, FADRx, FE3Ri, FLVRx, GLYALDtpp, GLYtpp, LDH_D, UREAtpp
358	-58.9846	EX_succ_e	7.97599	-7.5	0.157559	6	34.9228	-10.6764	-2.79929	27.7291	9.99301	b3844, b4117, b0010, b3927, b1380, b2430	ACt2rpp, ARGDC, FADRx, FE3Ri, FLVRx, GLYALDtpp, GLYtpp, LDH_D, UREAtpp
359	-58.9846	EX_succ_e	7.97599	-7.5	0.157559	6	34.9228	-10.6764	-2.79929	27.7291	9.99301	b3844, b4117, b0010, b3927, b1380, b0693	ACt2rpp, ARGDC, FADRx, FE3Ri, FLVRx, GLYALDtpp, GLYtpp, LDH_D, UREAtpp
360	-58.9846	EX_succ_e	7.97599	-7.5	0.157559	6	34.9228	-10.6764	-2.79929	27.7291	9.99301	b3844, b4117, b0825, b0010, b3927, b1380	ACt2rpp, ARGDC, FADRx, FE3Ri, FLVRx, GLYALDtpp, GLYtpp, LDH_D, UREAtpp
361	-58.9846	EX_succ_e	7.97599	-7.5	0.157559	6	34.9228	-10.6764	-2.79929	27.7291	9.99301	b3844, b4117, b0010, b2167, b3927, b1380	ACt2rpp, ARGDC, FADRx, FE3Ri, FLVRx, FRUptspp, GLYALDtpp, GLYtpp, LDH_D, UREAtpp
362	-58.9846	EX_succ_e	7.97599	-7.5	0.157559	6	34.9228	-10.6764	-2.79929	27.7291	9.99301	b3844, b0010, b4115, b3927, b1380, b0418	ACt2rpp, ARGAGMt7pp, FADRx, FE3Ri, FLVRx, GLYALDtpp, GLYtpp, LDH_D, UREAtpp
363	-58.9846	EX_succ_e	7.97599	-7.5	0.157559	6	34.9228	-10.6764	-2.79929	27.7291	9.99301	b3844, b4117, b0010, b3927, b1380, b4337	ACt2rpp, ARGDC, CHOLATEtpp, FADRx, FE3Ri, FLVRx, GLYALDtpp, GLYtpp, LDH_D, UREAtpp
364	-58.9846	EX_succ_e	7.97599	-7.5	0.157559	6	34.9228	-10.6764	-2.79929	27.7291	9.99301	b3844, b3137, b0010, b4115, b3927, b1380	ACt2rpp, ARGAGMt7pp, FADRx, FE3Ri, FLVRx, GLYALDtpp, GLYtpp, LDH_D, UREAtpp
365	-58.9846	EX_succ_e	7.97599	-7.5	0.157559	6	34.9228	-10.6764	-2.79929	27.7291	9.99301	b3844, b0010, b4115, b3927, b1380, b1276	ACt2rpp, ARGAGMt7pp, FADRx, FE3Ri, FLVRx, GLYALDtpp, GLYtpp, LDH_D, UREAtpp
366	-58.9846	EX_succ_e	7.97599	-7.5	0.157559	6	34.9228	-10.6764	-2.79929	27.7291	9.99301	b3951, b3844, b4117, b0010, b3927, b1380	ACt2rpp, ARGDC, FADRx, FE3Ri, FLVRx, GLYALDtpp, GLYtpp, LDH_D, UREAtpp
367	-58.9846	EX_succ_e	7.97599	-7.5	0.157559	6	34.9228	-10.6764	-2.79929	27.7291	9.99301	b3844, b4117, b0010, b0763, b3927, b1380	ACt2rpp, ARGDC, FADRx, FE3Ri, FLVRx, GLYALDtpp, GLYtpp, LDH_D, TUNGSabcpp, UREAtpp
368	-58.9846	EX_succ_e	7.97599	-7.5	0.157559	6	34.9228	-10.6764	-2.79929	27.7291	9.99301	b3844, b4117, b0010, b3714, b3927, b1380	ACt2rpp, ARGDC, FADRx, FE3Ri, FLVRx, GLYALDtpp, GLYtpp, LDH_D, UREAtpp
369	-58.9846	EX_succ_e	7.97599	-7.5	0.157559	6	34.9228	-10.6764	-2.79929	27.7291	9.99301	b3844, b4117, b2052, b0010, b3927, b1380	ACt2rpp, ARGDC, FADRx, FE3Ri, FLVRx, GDMANE, GLYALDtpp, GLYtpp, GOFUCR, LDH_D, UREAtpp
370	-58.9846	EX_succ_e	7.97599	-7.5	0.157559	6	34.9228	-10.6764	-2.79929	27.7291	9.99301	b3844, b0010, b4115, b1329, b3927, b1380	ACt2rpp, ARGAGMt7pp, FADRx, FE3Ri, FLVRx, GLYALDtpp, GLYtpp, LDH_D, UREAtpp
371	-58.9846	EX_succ_e	7.97599	-7.5	0.157559	6	34.9228	-10.6764	-2.79929	27.7291	9.99301	b3844, b4117, b0010, b3927, b1380, b1474	ACt2rpp, ARGDC, FADRx, FE3Ri, FLVRx, GLYALDtpp, GLYtpp, LDH_D, UREAtpp
372	-58.9846	EX_succ_e	7.97599	-7.5	0.157559	6	34.9228	-10.6764	-2.79929	27.7291	9.99301	b1590, b3844, b0010, b4115, b3927, b1380	ACt2rpp, ARGAGMt7pp, FADRx, FE3Ri, FLVRx, GLYALDtpp, GLYtpp, LDH_D, SELR, UREAtpp
373	-58.9846	EX_succ_e	7.97599	-7.5	0.157559	6	34.9228	-10.6764	-2.79929	27.7291	9.99301	b3844, b4117, b0010, b2723, b3927, b1380	ACt2rpp, ARGDC, FADRx, FE3Ri, FLVRx, GLYALDtpp, GLYtpp, LDH_D, UREAtpp
374	-58.9846	EX_succ_e	7.97599	-7.5	0.157559	6	34.9228	-10.6764	-2.79929	27.7291	9.99301	b3844, b4117, b0010, b4031, b3927, b1380	ACt2rpp, ARGDC, FADRx, FE3Ri, FLVRx, GLYALDtpp, GLYtpp, LDH_D, UREAtpp, XYLt2pp
375	-58.9846	EX_succ_e	7.97599	-7.5	0.157559	6	34.9228	-10.6764	-2.79929	27.7291	9.99301	b3844, b0010, b1463, b4115, b3927, b1380	ACANTHAT, ACt2rpp, ARGAGMt7pp, FADRx, FE3Ri, FLVRx, GLYALDtpp, GLYtpp, LDH_D, UREAtpp
376	-58.9846	EX_succ_e	7.97599	-7.5	0.157559	6	34.9228	-10.6764	-2.79929	27.7291	9.99301	b3844, b2162, b4117, b0010, b3927, b1380	ACt2rpp, ARGDC, FADRx, FE3Ri, FLVRx, GLYALDtpp, GLYtpp, LDH_D, UREAtpp
377	-58.9846	EX_succ_e	7.97599	-7.5	0.157559	6	34.9228	-10.6764	-2.79929	27.7291	9.99301	b3844, b4117, b0010, b3927, b1380, b0597	3HBZCT, ACt2rpp, ARGDC, FADRx, FE3Ri, FLVRx, GLYALDtpp, GLYtpp, LDH_D, UREAtpp
378	-58.9846	EX_succ_e	7.97599	-7.5	0.157559	6	34.9228	-10.6764	-2.79929	27.7291	9.99301	b3844, b0010, b4115, b3927, b1380, b1634	ACt2rpp, ARGAGMt7pp, FADRx, FE3Ri, FLVRx, GLYALDtpp, GLYtpp, LDH_D, UREAtpp
379	-58.9846	EX_succ_e	7.97599	-7.5	0.157559	6	34.9228	-10.6764	-2.79929	27.7291	9.99301	b3844, b2662, b0010, b4115, b3927, b1380	ACt2rpp, ARGAGMt7pp, FADRx, FE3Ri, FLVRx, GLYALDtpp, GLYtpp, LDH_D, UREAtpp
380	-58.9846	EX_succ_e	7.97599	-7.5	0.157559	6	34.9228	-10.6764	-2.79929	27.7291	9.99301	b3844, b4117, b0010, b1296, b3927, b1380	ACt2rpp, ARGDC, FADRx, FE3Ri, FLVRx, GLYALDtpp, GLYtpp, LDH_D, UREAtpp
381	-58.9846	EX_succ_e	7.97599	-7.5	0.157559	6	34.9228	-10.6764	-2.79929	27.7291	9.99301	b3844, b2582, b0010, b4115, b3927, b1380	ACt2rpp, ARGAGMt7pp, FADRx, FE3Ri, FLVRx, GLYALDtpp, GLYtpp, LDH_D, UREAtpp
382	-58.9846	EX_succ_e	7.97599	-7.5	0.157559	6	34.9228	-10.6764	-2.79929	27.7291	9.99301	b3844, b3223, b0010, b4115, b3927, b1380	ACt2rpp, AMANAPEr, ARGAGMt7pp, FADRx, FE3Ri, FLVRx, GLYALDtpp, GLYtpp, LDH_D, UREAtpp
383	-58.9846	EX_succ_e	7.97599	-7.5	0.157559	6	34.9228	-10.6764	-2.79929	27.7291	9.99301	b3844, b0010, b4115, b2490, b3927, b1380	ACt2rpp, ARGAGMt7pp, FADRx, FE3Ri, FLVRx, GLYALDtpp, GLYtpp, LDH_D, UREAtpp
384	-58.9846	EX_succ_e	7.97599	-7.5	0.157559	6	34.9228	-10.6764	-2.79929	27.7291	9.99301	b3844, b4117, b0010, b3927, b1380, b0630	ACt2rpp, ARGDC, FADRx, FE3Ri, FLVRx, GLYALDtpp, GLYtpp, LDH_D, LIPOCT, UREAtpp
385	-58.9846	EX_succ_e	7.97599	-7.5	0.157559	6	34.9228	-10.6764	-2.79929	27.7291	9.99301	b3844, b4117, b0010, b3927, b1380, b4095	ACt2rpp, ARGDC, FADRx, FE3Ri, FLVRx, GLYALDtpp, GLYtpp, LDH_D, RPNTPH, UREAtpp
386	-58.9846	EX_succ_e	7.97599	-7.5	0.157559	6	34.9228	-10.6764	-2.79929	27.7291	9.99301	b3844, b0010, b4115, b3927, b1380, b0268	ACt2rpp, ARGAGMt7pp, FADRx, FE3Ri, FLVRx, GLYALDtpp, GLYtpp, LDH_D, UREAtpp
387	-58.9846	EX_succ_e	7.97599	-7.5	0.157559	6	34.9228	-10.6764	-2.79929	27.7291	9.99301	b3844, b4117, b0273, b0010, b3927, b1380	ACt2rpp, ARGDC, FADRx, FE3Ri, FLVRx, GLYALDtpp, GLYtpp, LDH_D, UREAtpp
388	-58.9846	EX_succ_e	7.97599	-7.5	0.157559	6	34.9228	-10.6764	-2.79929	27.7291	9.99301	b3844, b4117, b0010, b3927, b1380, b2765	ACt2rpp, ARGDC, CPH4S, FADRx, FE3Ri, FLVRx, GLYALDtpp, GLYtpp, LDH_D, UREAtpp
389	-58.9846	EX_succ_e	7.97599	-7.5	0.157559	6	34.9228	-10.6764	-2.79929	27.7291	9.99301	b3844, b0010, b4115, b3927, b1380, b0353	ACt2rpp, ARGAGMt7pp, FADRx, FE3Ri, FLVRx, GLYALDtpp, GLYtpp, HCINNMt2rpp, HPPPNt2rpp, LDH_D, UREAtpp
390	-58.9846	EX_succ_e	7.97599	-7.5	0.157559	6	34.9228	-10.6764	-2.79929	27.7291	9.99301	b3844, b3359, b0010, b4115, b3927, b1380	ACt2rpp, ARGAGMt7pp, FADRx, FE3Ri, FLVRx, GLYALDtpp, GLYtpp, LDH_D, UREAtpp
391	-58.9846	EX_succ_e	7.97599	-7.5	0.157559	6	34.9228	-10.6764	-2.79929	27.7291	9.99301	b3844, b4117, b0010, b3927, b1380, b1400	2HPTCOAT, ACt2rpp, ARGDC, FADRx, FE3Ri, FLVRx, GLYALDtpp, GLYtpp, LDH_D, UREAtpp
392	-58.9846	EX_succ_e	7.97599	-7.5	0.157559	6	34.9228	-10.6764	-2.79929	27.7291	9.99301	b3844, b4117, b0335, b0010, b3927, b1380	ACt2rpp, ARGDC, FADRx, FE3Ri, FLVRx, GLYALDtpp, GLYtpp, LDH_D, UREAtpp
393	-58.9846	EX_succ_e	7.97599	-7.5	0.157559	6	34.9228	-10.6764	-2.79929	27.7291	9.99301	b3844, b0010, b4115, b2032, b3927, b1380	ACt2rpp, ARGAGMt7pp, FADRx, FE3Ri, FLVRx, GLYALDtpp, GLYtpp, LDH_D, O16GLCT1, UREAtpp
394	-58.9846	EX_succ_e	7.97599	-7.5	0.157559	6	34.9228	-10.6764	-2.79929	27.7291	9.99301	b3844, b4117, b0010, b3927, b1380, b2092	ACt2rpp, ARGDC, FADRx, FE3Ri, FLVRx, GALTptspp, GLYALDtpp, GLYtpp, LDH_D, UREAtpp
395	-58.9846	EX_succ_e	7.97599	-7.5	0.157559	6	34.9228	-10.6764	-2.79929	27.7291	9.99301	b3844, b0010, b4115, b3927, b1380, b2247	ACt2rpp, ARGAGMt7pp, FADRx, FE3Ri, FLVRx, GLYALDtpp, GLYtpp, LDH_D, RHMND, UREAtpp
396	-58.9846	EX_succ_e	7.97599	-7.5	0.157559	6	34.9228	-10.6764	-2.79929	27.7291	9.99301	b3844, b4117, b0010, b2484, b3927, b1380	ACt2rpp, ARGDC, FADRx, FE3Ri, FLVRx, GLYALDtpp, GLYtpp, LDH_D, UREAtpp
397	-58.9846	EX_succ_e	7.97599	-7.5	0.157559	6	34.9228	-10.6764	-2.79929	27.7291	9.99301	b0493, b3844, b4117, b0010, b3927, b1380	ACt2rpp, ARGDC, FADRx, FE3Ri, FLVRx, GLYALDtpp, GLYtpp, LDH_D, UREAtpp
398	-58.9846	EX_succ_e	7.97599	-7.5	0.157559	6	34.9228	-10.6764	-2.79929	27.7291	9.99301	b3844, b0010, b4115, b3927, b1380, b1856	ACt2rpp, ARGAGMt7pp, FADRx, FE3Ri, FLVRx, GLYALDtpp, GLYtpp, LDH_D, UREAtpp
399	-58.9846	EX_succ_e	7.97599	-7.5	0.157559	6	34.9228	-10.6764	-2.79929	27.7291	9.99301	b3844, b0010, b1101, b4115, b3927, b1380	ACt2rpp, ARGAGMt7pp, FADRx, FE3Ri, FLVRx, GLYALDtpp, GLYtpp, LDH_D, UREAtpp
400	-58.9846	EX_succ_e	7.97599	-7.5	0.157559	6	34.9228	-10.6764	-2.79929	27.7291	9.99301	b3844, b0010, b4115, b0124, b3927, b1380	ACt2rpp, ARGAGMt7pp, FADRx, FE3Ri, FLVRx, GLYALDtpp, GLYtpp, LDH_D, UREAtpp
401	-58.9846	EX_succ_e	7.97599	-7.5	0.157559	6	34.9228	-10.6764	-2.79929	27.7291	9.99301	b3844, b4117, b2291, b0010, b3927, b1380	ACt2rpp, ARGDC, FADRx, FE3Ri, FLVRx, GLYALDtpp, GLYtpp, LDH_D, UREAtpp
402	-58.9846	EX_succ_e	7.97599	-7.5	0.157559	6	34.9228	-10.6764	-2.79929	27.7291	9.99301	b3844, b4117, b3600, b0010, b3927, b1380	ACt2rpp, ARGDC, FADRx, FE3Ri, FLVRx, GLYALDtpp, GLYtpp, LDH_D, M1PD, UREAtpp
403	-58.9846	EX_succ_e	7.97599	-7.5	0.157559	6	34.9228	-10.6764	-2.79929	27.7291	9.99301	b3844, b4117, b0010, b3927, b1380, b1103	ACt2rpp, ARGDC, FADRx, FE3Ri, FLVRx, GLYALDtpp, GLYtpp, LDH_D, PNSPA, UREAtpp
404	-58.9846	EX_succ_e	7.97599	-7.5	0.157559	6	34.9228	-10.6764	-2.79929	27.7291	9.99301	b3844, b4117, b0010, b2417, b3927, b1380	ACMUMptspp, ACt2rpp, ARGDC, FADRx, FE3Ri, FLVRx, GLYALDtpp, GLYtpp, LDH_D, MALTptspp, SUCptspp, TREptspp, UREAtpp
405	-58.9846	EX_succ_e	7.97599	-7.5	0.157559	6	34.9228	-10.6764	-2.79929	27.7291	9.99301	b3844, b0010, b4115, b3927, b1380, b3525	ACt2rpp, ARGAGMt7pp, FADRx, FE3Ri, FLVRx, GLYALDtpp, GLYtpp, LDH_D, UREAtpp
406	-58.9846	EX_succ_e	7.97599	-7.5	0.157559	6	34.9228	-10.6764	-2.79929	27.7291	9.99301	b3844, b3940, b4117, b0010, b3927, b1380	ACt2rpp, ARGDC, FADRx, FE3Ri, FLVRx, GLYALDtpp, GLYtpp, LDH_D, UREAtpp
407	-58.9846	EX_succ_e	7.97599	-7.5	0.157559	6	34.9228	-10.6764	-2.79929	27.7291	9.99301	b3844, b0010, b4115, b4034, b3927, b1380	14GLUCANabcpp, ACt2rpp, ARGAGMt7pp, FADRx, FE3Ri, FLVRx, GLYALDtpp, GLYtpp, LDH_D, MALTHXabcpp, MALTPTabcpp, MALTTRabcpp, MALTTTRabcpp, MALTabcpp, UREAtpp
408	-58.9846	EX_succ_e	7.97599	-7.5	0.157559	6	34.9228	-10.6764	-2.79929	27.7291	9.99301	b3844, b0340, b0010, b4115, b3927, b1380	ACt2rpp, ARGAGMt7pp, CYNTAH, FADRx, FE3Ri, FLVRx, GLYALDtpp, GLYtpp, LDH_D, UREAtpp
409	-58.9846	EX_succ_e	7.97599	-7.5	0.157559	6	34.9228	-10.6764	-2.79929	27.7291	9.99301	b3844, b4117, b3385, b0010, b3927, b1380	ACt2rpp, ARGDC, FADRx, FE3Ri, FLVRx, GLYALDtpp, GLYtpp, LDH_D, PGLYCP, UREAtpp
410	-58.9846	EX_succ_e	7.97599	-7.5	0.157559	6	34.9228	-10.6764	-2.79929	27.7291	9.99301	b3844, b4117, b0010, b1270, b3927, b1380	ACt2rpp, ARGDC, CBIAT, CBLAT, FADRx, FE3Ri, FLVRx, GLYALDtpp, GLYtpp, LDH_D, UREAtpp
411	-58.9846	EX_succ_e	7.97599	-7.5	0.157559	6	34.9228	-10.6764	-2.79929	27.7291	9.99301	b3844, b4117, b0010, b4035, b3927, b1380	14GLUCANabcpp, ACt2rpp, ARGDC, FADRx, FE3Ri, FLVRx, GLYALDtpp, GLYtpp, LDH_D, MALTHXabcpp, MALTPTabcpp, MALTTRabcpp, MALTTTRabcpp, MALTabcpp, UREAtpp
412	-58.9846	EX_succ_e	7.97599	-7.5	0.157559	6	34.9228	-10.6764	-2.79929	27.7291	9.99301	b3844, b0010, b4115, b4544, b3927, b1380	ACt2rpp, ARGAGMt7pp, FADRx, FE3Ri, FLVRx, GLYALDtpp, GLYtpp, LDH_D, ULA4Ntppi, UREAtpp
413	-58.9846	EX_succ_e	7.97599	-7.5	0.157559	6	34.9228	-10.6764	-2.79929	27.7291	9.99301	b2930, b3844, b4117, b0010, b3927, b1380	ACt2rpp, ARGDC, FADRx, FE3Ri, FLVRx, GLYALDtpp, GLYtpp, LDH_D, UREAtpp
414	-58.9846	EX_succ_e	7.97599	-7.5	0.157559	6	34.9228	-10.6764	-2.79929	27.7291	9.99301	b3844, b4117, b0010, b1778, b3927, b1380	ACt2rpp, ARGDC, FADRx, FE3Ri, FLVRx, GLYALDtpp, GLYtpp, LDH_D, UREAtpp
415	-58.9846	EX_succ_e	7.97599	-7.5	0.157559	6	34.9228	-10.6764	-2.79929	27.7291	9.99301	b3844, b1622, b0010, b4115, b3927, b1380	ACt2rpp, ARGAGMt7pp, FADRx, FE3Ri, FLVRx, GLYALDtpp, GLYtpp, LDH_D, UREAtpp
416	-58.9846	EX_succ_e	7.97599	-7.5	0.157559	6	34.9228	-10.6764	-2.79929	27.7291	9.99301	b3844, b0010, b4115, b3927, b1380, b4476	ACt2rpp, ARGAGMt7pp, FADRx, FE3Ri, FLVRx, GLYALDtpp, GLYtpp, LDH_D, UREAtpp
417	-58.9846	EX_succ_e	7.97599	-7.5	0.157559	6	34.9228	-10.6764	-2.79929	27.7291	9.99301	b3844, b4117, b0010, b3917, b3927, b1380	ACt2rpp, ARGDC, FADRx, FE3Ri, FLVRx, GLYALDtpp, GLYtpp, LDH_D, UREAtpp
418	-58.9846	EX_succ_e	7.97599	-7.5	0.157559	6	34.9228	-10.6764	-2.79929	27.7291	9.99301	b3844, b0010, b4115, b2722, b3927, b1380	ACt2rpp, ARGAGMt7pp, FADRx, FE3Ri, FLVRx, GLYALDtpp, GLYtpp, LDH_D, UREAtpp
419	-58.9846	EX_succ_e	7.97599	-7.5	0.157559	6	34.9228	-10.6764	-2.79929	27.7291	9.99301	b0125, b3844, b4117, b0010, b3927, b1380	ACt2rpp, ARGDC, FADRx, FE3Ri, FLVRx, GLYALDtpp, GLYtpp, LDH_D, UREAtpp
420	-58.9846	EX_succ_e	7.97599	-7.5	0.157559	6	34.9228	-10.6764	-2.79929	27.7291	9.99301	b3844, b4117, b0010, b3927, b1380, b2037	ACt2rpp, ARGDC, FADRx, FE3Ri, FLVRx, GLYALDtpp, GLYtpp, LDH_D, O16AUNDtpp, UREAtpp
421	-58.9846	EX_succ_e	7.97599	-7.5	0.157559	6	34.9228	-10.6764	-2.79929	27.7291	9.99301	b3844, b0010, b4115, b0973, b3927, b1380	ACt2rpp, ARGAGMt7pp, FADRx, FE3Ri, FLVRx, GLYALDtpp, GLYtpp, LDH_D, UREAtpp
422	-58.9846	EX_succ_e	7.97599	-7.5	0.157559	6	34.9228	-10.6764	-2.79929	27.7291	9.99301	b3844, b4117, b2788, b0010, b3927, b1380	ACt2rpp, ARGDC, FADRx, FE3Ri, FLVRx, GLYALDtpp, GLYtpp, LDH_D, UREAtpp
423	-58.9846	EX_succ_e	7.97599	-7.5	0.157559	6	34.9228	-10.6764	-2.79929	27.7291	9.99301	b3844, b0010, b0863, b4115, b3927, b1380	ACt2rpp, ARGAGMt7pp, FADRx, FE3Ri, FLVRx, GLYALDtpp, GLYtpp, LDH_D, UREAtpp
424	-58.9846	EX_succ_e	7.97599	-7.5	0.157559	6	34.9228	-10.6764	-2.79929	27.7291	9.99301	b3844, b4117, b0010, b3927, b1380, b4100	ACt2rpp, ARGDC, ARMEPNS, FADRx, FE3Ri, FLVRx, GLYALDtpp, GLYtpp, LDH_D, UREAtpp
425	-58.9846	EX_succ_e	7.97599	-7.5	0.157559	6	34.9228	-10.6764	-2.79929	27.7291	9.99301	b3844, b4117, b3132, b0010, b3927, b1380	ACt2rpp, ARGDC, FADRx, FE3Ri, FLVRx, GLYALDtpp, GLYtpp, LDH_D, UREAtpp
426	-58.9846	EX_succ_e	7.97599	-7.5	0.157559	6	34.9228	-10.6764	-2.79929	27.7291	9.99301	b3126, b3844, b0010, b4115, b3927, b1380	ACt2rpp, ARGAGMt7pp, FADRx, FE3Ri, FLVRx, GLCRAL, GLYALDtpp, GLYtpp, LDH_D, UREAtpp
427	-58.9846	EX_succ_e	7.97599	-7.5	0.157559	6	34.9228	-10.6764	-2.79929	27.7291	9.99301	b3844, b3583, b0010, b4115, b3927, b1380	ACt2rpp, ARGAGMt7pp, FADRx, FE3Ri, FLVRx, GLYALDtpp, GLYtpp, LDH_D, UREAtpp
428	-58.9846	EX_succ_e	7.97599	-7.5	0.157559	6	34.9228	-10.6764	-2.79929	27.7291	9.99301	b3844, b0010, b4115, b2258, b3927, b1380	ACt2rpp, ARGAGMt7pp, FADRx, FE3Ri, FLVRx, GLYALDtpp, GLYtpp, LDH_D, ULA4Ntppi, UREAtpp
429	-58.9846	EX_succ_e	7.97599	-7.5	0.157559	6	34.9228	-10.6764	-2.79929	27.7291	9.99301	b3844, b4117, b1302, b0010, b3927, b1380	ACt2rpp, ARGDC, FADRx, FE3Ri, FLVRx, GLYALDtpp, GLYtpp, LDH_D, UREAtpp
430	-58.9846	EX_succ_e	7.97599	-7.5	0.157559	6	34.9228	-10.6764	-2.79929	27.7291	9.99301	b3844, b4117, b4196, b0010, b3927, b1380	ACt2rpp, ARGDC, FADRx, FE3Ri, FLVRx, GLYALDtpp, GLYtpp, LDH_D, UREAtpp
431	-58.9846	EX_succ_e	7.97599	-7.5	0.157559	6	34.9228	-10.6764	-2.79929	27.7291	9.99301	b1694, b3844, b4117, b0010, b3927, b1380	ACt2rpp, ARGDC, FADRx, FE3Ri, FLVRx, GLYALDtpp, GLYtpp, LDH_D, UREAtpp
432	-58.9846	EX_succ_e	7.97599	-7.5	0.157559	6	34.9228	-10.6764	-2.79929	27.7291	9.99301	b3844, b1096, b0010, b4115, b3927, b1380	ACt2rpp, ARGAGMt7pp, FADRx, FE3Ri, FLVRx, GLYALDtpp, GLYtpp, LDH_D, UREAtpp
433	-58.9846	EX_succ_e	7.97599	-7.5	0.157559	6	34.9228	-10.6764	-2.79929	27.7291	9.99301	b2039, b3844, b4117, b0010, b3927, b1380	ACt2rpp, ARGDC, FADRx, FE3Ri, FLVRx, GLYALDtpp, GLYtpp, LDH_D, UREAtpp
434	-58.9846	EX_succ_e	7.97599	-7.5	0.157559	6	34.9228	-10.6764	-2.79929	27.7291	9.99301	b3844, b0010, b4115, b3927, b1380, b4474	ACt2rpp, ARGAGMt7pp, FADRx, FE3Ri, FLVRx, FRULYSE, GLYALDtpp, GLYtpp, LDH_D, UREAtpp
435	-58.9846	EX_succ_e	7.97599	-7.5	0.157559	6	34.9228	-10.6764	-2.79929	27.7291	9.99301	b3844, b4117, b0010, b3927, b1380, b1449	ACt2rpp, ARGDC, CURR, DHCURR, FADRx, FE3Ri, FLVRx, GLYALDtpp, GLYtpp, LDH_D, UREAtpp
436	-58.9846	EX_succ_e	7.97599	-7.5	0.157559	6	34.9228	-10.6764	-2.79929	27.7291	9.99301	b3844, b4117, b2538, b0010, b3927, b1380	ACt2rpp, ARGDC, CINNDO, FADRx, FE3Ri, FLVRx, GLYALDtpp, GLYtpp, LDH_D, PPPNDO, UREAtpp
437	-58.9846	EX_succ_e	7.97599	-7.5	0.157559	6	34.9228	-10.6764	-2.79929	27.7291	9.99301	b3844, b4117, b0010, b3580, b3927, b1380	3KGK, ACt2rpp, ARGDC, FADRx, FE3Ri, FLVRx, GLYALDtpp, GLYtpp, LDH_D, UREAtpp
438	-58.9846	EX_succ_e	7.97599	-7.5	0.157559	6	34.9228	-10.6764	-2.79929	27.7291	9.99301	b3844, b4117, b0010, b0092, b3927, b1380	ACt2rpp, ARGDC, FADRx, FE3Ri, FLVRx, GLYALDtpp, GLYtpp, LDH_D, UREAtpp
439	-58.9846	EX_succ_e	7.97599	-7.5	0.157559	6	34.9228	-10.6764	-2.79929	27.7291	9.99301	b3844, b4117, b0010, b3477, b3927, b1380	ACt2rpp, ARGDC, FADRx, FE3Ri, FLVRx, GLYALDtpp, GLYtpp, LDH_D, UREAtpp
440	-58.9846	EX_succ_e	7.97599	-7.5	0.157559	6	34.9228	-10.6764	-2.79929	27.7291	9.99301	b3844, b4117, b0010, b3927, b1380, b0875	ACt2rpp, ARGDC, FADRx, FE3Ri, FLVRx, GLYALDtpp, GLYtpp, LDH_D, UREAtpp
441	-58.9846	EX_succ_e	7.97599	-7.5	0.157559	6	34.9228	-10.6764	-2.79929	27.7291	9.99301	b3844, b4117, b0010, b3927, b1380, b1448	ACt2rpp, ARGDC, FADRx, FE3Ri, FLVRx, GLYALDtpp, GLYtpp, LDH_D, METNA, UREAtpp
442	-58.9846	EX_succ_e	7.97599	-7.5	0.157559	6	34.9228	-10.6764	-2.79929	27.7291	9.99301	b1694, b3844, b0010, b4115, b3927, b1380	ACt2rpp, ARGAGMt7pp, FADRx, FE3Ri, FLVRx, GLYALDtpp, GLYtpp, LDH_D, UREAtpp
443	-58.9846	EX_succ_e	7.97599	-7.5	0.157559	6	34.9228	-10.6764	-2.79929	27.7291	9.99301	b3844, b4352, b0010, b4115, b3927, b1380	ACt2rpp, ARGAGMt7pp, FADRx, FE3Ri, FLVRx, GLYALDtpp, GLYtpp, LDH_D, UREAtpp
444	-58.9846	EX_succ_e	7.97599	-7.5	0.157559	6	34.9228	-10.6764	-2.79929	27.7291	9.99301	b3844, b0010, b4115, b1441, b3927, b1380	ACt2rpp, ARGAGMt7pp, FADRx, FE3Ri, FLVRx, GLYALDtpp, GLYtpp, LDH_D, UREAtpp
445	-58.9846	EX_succ_e	7.97599	-7.5	0.157559	6	34.9228	-10.6764	-2.79929	27.7291	9.99301	b3844, b4117, b0010, b3927, b1380, b3415	ACt2rpp, ARGDC, FADRx, FE3Ri, FLVRx, GLYALDtpp, GLYtpp, LDH_D, UREAtpp
446	-58.9846	EX_succ_e	7.97599	-7.5	0.157559	6	34.9228	-10.6764	-2.79929	27.7291	9.99301	b3844, b0046, b4117, b0010, b3927, b1380	ACt2rpp, ARGDC, FADRx, FE3Ri, FLVRx, GLYALDtpp, GLYtpp, LDH_D, UREAtpp
447	-58.9846	EX_succ_e	7.97599	-7.5	0.157559	6	34.9228	-10.6764	-2.79929	27.7291	9.99301	b3844, b4117, b0010, b0388, b3927, b1380	ACt2rpp, ARGDC, FADRx, FE3Ri, FLVRx, GLYALDtpp, GLYtpp, LDH_D, UREAtpp
448	-58.9846	EX_succ_e	7.97599	-7.5	0.157559	6	34.9228	-10.6764	-2.79929	27.7291	9.99301	b2341, b3844, b4117, b0010, b3927, b1380	ACt2rpp, ARGDC, FADRx, FE3Ri, FLVRx, GLYALDtpp, GLYtpp, LDH_D, UREAtpp
449	-58.9846	EX_succ_e	7.97599	-7.5	0.157559	6	34.9228	-10.6764	-2.79929	27.7291	9.99301	b3844, b3517, b0010, b4115, b3927, b1380	ACt2rpp, ARGAGMt7pp, FADRx, FE3Ri, FLVRx, GLYALDtpp, GLYtpp, LDH_D, UREAtpp
450	-58.9846	EX_succ_e	7.97599	-7.5	0.157559	6	34.9228	-10.6764	-2.79929	27.7291	9.99301	b3844, b0010, b4169, b4115, b3927, b1380	ACt2rpp, ARGAGMt7pp, FADRx, FE3Ri, FLVRx, GLYALDtpp, GLYtpp, LDH_D, UREAtpp
451	-58.9846	EX_succ_e	7.97599	-7.5	0.157559	6	34.9228	-10.6764	-2.79929	27.7291	9.99301	b3844, b2104, b4117, b0010, b3927, b1380	ACt2rpp, ARGDC, FADRx, FE3Ri, FLVRx, GLYALDtpp, GLYtpp, HETZK, LDH_D, UREAtpp
452	-58.9846	EX_succ_e	7.97599	-7.5	0.157559	6	34.9228	-10.6764	-2.79929	27.7291	9.99301	b3114, b3844, b4117, b0010, b3927, b1380	ACt2rpp, ARGDC, FADRx, FE3Ri, FLVRx, GLYALDtpp, GLYtpp, LDH_D, UREAtpp
453	-58.9846	EX_succ_e	7.97599	-7.5	0.157559	6	34.9228	-10.6764	-2.79929	27.7291	9.99301	b3693, b3844, b4117, b0010, b3927, b1380	ACt2rpp, ARGDC, DDGALK, FADRx, FE3Ri, FLVRx, GLYALDtpp, GLYtpp, LDH_D, UREAtpp
454	-58.9846	EX_succ_e	7.97599	-7.5	0.157559	6	34.9228	-10.6764	-2.79929	27.7291	9.99301	b3844, b4117, b2668, b0010, b3927, b1380	ACt2rpp, ARGDC, FADRx, FE3Ri, FLVRx, GLYALDtpp, GLYtpp, LDH_D, UREAtpp
455	-58.9846	EX_succ_e	7.97599	-7.5	0.157559	6	34.9228	-10.6764	-2.79929	27.7291	9.99301	b3844, b4117, b0010, b1247, b3927, b1380	ACt2rpp, ARGDC, FADRx, FE3Ri, FLVRx, GLYALDtpp, GLYtpp, LDH_D, UREAtpp
456	-58.9846	EX_succ_e	7.97599	-7.5	0.157559	6	34.9228	-10.6764	-2.79929	27.7291	9.99301	b3844, b4117, b0010, b0047, b3927, b1380	ACt2rpp, ARGDC, FADRx, FE3Ri, FLVRx, GLYALDtpp, GLYtpp, LDH_D, UREAtpp
457	-58.9846	EX_succ_e	7.97599	-7.5	0.157559	6	34.9228	-10.6764	-2.79929	27.7291	9.99301	b3844, b0010, b4115, b1246, b3927, b1380	ACt2rpp, ARGAGMt7pp, FADRx, FE3Ri, FLVRx, GLYALDtpp, GLYtpp, LDH_D, UREAtpp
458	-58.9846	EX_succ_e	7.97599	-7.5	0.157559	6	34.9228	-10.6764	-2.79929	27.7291	9.99301	b3844, b4117, b0010, b3927, b1380, b1113	ACt2rpp, ARGDC, FADRx, FE3Ri, FLVRx, GLYALDtpp, GLYtpp, LDH_D, UREAtpp
459	-58.9846	EX_succ_e	7.97599	-7.5	0.157559	6	34.9228	-10.6764	-2.79929	27.7291	9.99301	b3844, b4117, b0010, b3927, b1380, b4298	ACt2rpp, ARGDC, FADRx, FE3Ri, FLVRx, GLYALDtpp, GLYtpp, LDH_D, UREAtpp
460	-58.9846	EX_succ_e	7.97599	-7.5	0.157559	6	34.9228	-10.6764	-2.79929	27.7291	9.99301	b3844, b0010, b3849, b4115, b3927, b1380	ACt2rpp, ARGAGMt7pp, FADRx, FE3Ri, FLVRx, GLYALDtpp, GLYtpp, LDH_D, UREAtpp
461	-58.9846	EX_succ_e	7.97599	-7.5	0.157559	6	34.9228	-10.6764	-2.79929	27.7291	9.99301	b3844, b4117, b0010, b2704, b3927, b1380	ACt2rpp, ARGDC, FADRx, FE3Ri, FLVRx, GLYALDtpp, GLYtpp, LDH_D, SBTptspp, UREAtpp
462	-58.9846	EX_succ_e	7.97599	-7.5	0.157559	6	34.9228	-10.6764	-2.79929	27.7291	9.99301	b3844, b2173, b0010, b4115, b3927, b1380	ACt2rpp, ARGAGMt7pp, FADRx, FE3Ri, FLVRx, GLYALDtpp, GLYtpp, LDH_D, UREAtpp
463	-58.9846	EX_succ_e	7.97599	-7.5	0.157559	6	34.9228	-10.6764	-2.79929	27.7291	9.99301	b3844, b4117, b0010, b0842, b3927, b1380	ACt2rpp, ARGDC, FADRx, FE3Ri, FLVRx, GLYALDtpp, GLYtpp, LDH_D, UREAtpp
464	-58.9846	EX_succ_e	7.97599	-7.5	0.157559	6	34.9228	-10.6764	-2.79929	27.7291	9.99301	b3844, b1468, b0010, b4115, b3927, b1380	ACt2rpp, ARGAGMt7pp, FADRx, FE3Ri, FLVRx, GLYALDtpp, GLYtpp, LDH_D, UREAtpp
465	-58.9846	EX_succ_e	7.97599	-7.5	0.157559	6	34.9228	-10.6764	-2.79929	27.7291	9.99301	b3844, b4117, b0010, b4464, b3927, b1380	ACt2rpp, ARGDC, FADRx, FE3Ri, FLVRx, GLYALDtpp, GLYtpp, LDH_D, UREAtpp
466	-58.9846	EX_succ_e	7.97599	-7.5	0.157559	6	34.9228	-10.6764	-2.79929	27.7291	9.99301	b3844, b4117, b0010, b3927, b1380, b3241	4HBZt3pp, ACt2rpp, ARGDC, FADRx, FE3Ri, FLVRx, GLYALDtpp, GLYtpp, LDH_D, UREAtpp
467	-58.9846	EX_succ_e	7.97599	-7.5	0.157559	6	34.9228	-10.6764	-2.79929	27.7291	9.99301	b3844, b4117, b0010, b2719, b3927, b1380	ACt2rpp, ARGDC, FADRx, FE3Ri, FLVRx, GLYALDtpp, GLYtpp, LDH_D, UREAtpp
468	-58.9846	EX_succ_e	7.97599	-7.5	0.157559	6	34.9228	-10.6764	-2.79929	27.7291	9.99301	b3844, b4117, b0010, b3927, b1380, b2503	ACt2rpp, ARGDC, FADRx, FE3Ri, FLVRx, GLYALDtpp, GLYtpp, LDH_D, UREAtpp
469	-58.9846	EX_succ_e	7.97599	-7.5	0.157559	6	34.9228	-10.6764	-2.79929	27.7291	9.99301	b3844, b4117, b0010, b3927, b1380, b3691	ACt2rpp, ARGDC, FADRx, FE3Ri, FLVRx, GALCTNt2pp, GLYALDtpp, GLYtpp, LDH_D, UREAtpp
470	-58.9846	EX_succ_e	7.97599	-7.5	0.157559	6	34.9228	-10.6764	-2.79929	27.7291	9.99301	b3844, b0010, b4115, b4079, b3927, b1380	ACt2rpp, ARGAGMt7pp, FADRx, FE3Ri, FHL, FLVRx, GLYALDtpp, GLYtpp, LDH_D, UREAtpp
471	-58.9846	EX_succ_e	7.97599	-7.5	0.157559	6	34.9228	-10.6764	-2.79929	27.7291	9.99301	b0078, b3844, b0010, b4115, b3927, b1380	ACt2rpp, ARGAGMt7pp, FADRx, FE3Ri, FLVRx, GLYALDtpp, GLYtpp, LDH_D, UREAtpp
472	-58.9846	EX_succ_e	7.97599	-7.5	0.157559	6	34.9228	-10.6764	-2.79929	27.7291	9.99301	b3844, b0010, b3567, b4115, b3927, b1380	ACt2rpp, ARGAGMt7pp, FADRx, FE3Ri, FLVRx, GLYALDtpp, GLYtpp, LDH_D, UREAtpp, XYLabcpp
473	-58.9846	EX_succ_e	7.97599	-7.5	0.157559	6	34.9228	-10.6764	-2.79929	27.7291	9.99301	b3844, b4117, b0010, b3568, b3927, b1380	ACt2rpp, ARGDC, FADRx, FE3Ri, FLVRx, GLYALDtpp, GLYtpp, LDH_D, UREAtpp, XYLabcpp
474	-58.9846	EX_succ_e	7.97599	-7.5	0.157559	6	34.9228	-10.6764	-2.79929	27.7291	9.99301	b3844, b0010, b4115, b3927, b1380, b2711	ACt2rpp, ARGAGMt7pp, FADRx, FE3Ri, FLVRx, GLYALDtpp, GLYtpp, LDH_D, NHFRBO, UREAtpp
475	-58.9846	EX_succ_e	7.97599	-7.5	0.157559	6	34.9228	-10.6764	-2.79929	27.7291	9.99301	b3844, b0010, b4115, b3927, b1380, b0874	ACt2rpp, ARGAGMt7pp, FADRx, FE3Ri, FLVRx, GLYALDtpp, GLYtpp, LDH_D, UREAtpp
476	-58.9846	EX_succ_e	7.97599	-7.5	0.157559	6	34.9228	-10.6764	-2.79929	27.7291	9.99301	b3844, b4117, b0010, b3927, b1380, b0819	ACt2rpp, ARGDC, FADRx, FE3Ri, FLVRx, GLYALDtpp, GLYtpp, LDH_D, UREAtpp
477	-58.9846	EX_succ_e	7.97599	-7.5	0.157559	6	34.9228	-10.6764	-2.79929	27.7291	9.99301	b0894, b3844, b4117, b0010, b3927, b1380	ACt2rpp, ARGDC, DMSOR2, FADRx, FE3Ri, FLVRx, GLYALDtpp, GLYtpp, LDH_D, TMAOR2, UREAtpp
478	-58.9846	EX_succ_e	7.97599	-7.5	0.157559	6	34.9228	-10.6764	-2.79929	27.7291	9.99301	b3844, b4117, b0010, b3823, b3927, b1380	ACt2rpp, ARGDC, FADRx, FE3Ri, FLVRx, GLYALDtpp, GLYtpp, LDH_D, UREAtpp
479	-58.9846	EX_succ_e	7.97599	-7.5	0.157559	6	34.9228	-10.6764	-2.79929	27.7291	9.99301	b3844, b4117, b0010, b3927, b1380, b0149	ACt2rpp, ARGDC, FADRx, FE3Ri, FLVRx, GLYALDtpp, GLYtpp, LDH_D, UREAtpp
480	-58.9846	EX_succ_e	7.97599	-7.5	0.157559	6	34.9228	-10.6764	-2.79929	27.7291	9.99301	b3844, b3428, b4117, b0010, b3927, b1380	ACt2rpp, ARGDC, FADRx, FE3Ri, FLVRx, GLYALDtpp, GLYtpp, LDH_D, UREAtpp
481	-58.9846	EX_succ_e	7.97599	-7.5	0.157559	6	34.9228	-10.6764	-2.79929	27.7291	9.99301	b3844, b4117, b0010, b0402, b3927, b1380	ACt2rpp, ARGDC, FADRx, FE3Ri, FLVRx, GLYALDtpp, GLYtpp, LDH_D, UREAtpp
482	-58.9846	EX_succ_e	7.97599	-7.5	0.157559	6	34.9228	-10.6764	-2.79929	27.7291	9.99301	b3721, b3844, b0010, b4115, b3927, b1380	ACt2rpp, ARGAGMt7pp, FADRx, FE3Ri, FLVRx, GLYALDtpp, GLYtpp, LDH_D, UREAtpp
483	-58.9846	EX_succ_e	7.97599	-7.5	0.157559	6	34.9228	-10.6764	-2.79929	27.7291	9.99301	b3844, b4117, b0010, b3927, b4394, b1380	ACt2rpp, ARGDC, FADRx, FE3Ri, FLVRx, GLYALDtpp, GLYtpp, LDH_D, NTP11, NTP12, UREAtpp
484	-58.9846	EX_succ_e	7.97599	-7.5	0.157559	6	34.9228	-10.6764	-2.79929	27.7291	9.99301	b3844, b0010, b4115, b1308, b3927, b1380	ACt2rpp, ARGAGMt7pp, CYANSTpp, FADRx, FE3Ri, FLVRx, GLYALDtpp, GLYtpp, LDH_D, UREAtpp
485	-58.9846	EX_succ_e	7.97599	-7.5	0.157559	6	34.9228	-10.6764	-2.79929	27.7291	9.99301	b3844, b4117, b0010, b2180, b3927, b1380	ACt2rpp, ARGDC, FADRx, FE3Ri, FLVRx, GLYALDtpp, GLYtpp, LDH_D, UREAtpp
486	-58.9846	EX_succ_e	7.97599	-7.5	0.157559	6	34.9228	-10.6764	-2.79929	27.7291	9.99301	b2097, b3844, b0010, b4115, b3927, b1380	ACt2rpp, ARGAGMt7pp, FADRx, FE3Ri, FLVRx, GLYALDtpp, GLYtpp, LDH_D, UREAtpp
487	-58.9846	EX_succ_e	7.97599	-7.5	0.157559	6	34.9228	-10.6764	-2.79929	27.7291	9.99301	b3844, b0010, b4115, b3927, b1380, b3892	ACt2rpp, ARGAGMt7pp, FADRx, FE3Ri, FLVRx, GLYALDtpp, GLYtpp, LDH_D, UREAtpp
488	-58.9846	EX_succ_e	7.97599	-7.5	0.157559	6	34.9228	-10.6764	-2.79929	27.7291	9.99301	b3844, b4117, b1106, b0010, b3927, b1380	ACt2rpp, ARGDC, FADRx, FE3Ri, FLVRx, GLYALDtpp, GLYtpp, LDH_D, TMK, UREAtpp
489	-58.9846	EX_succ_e	7.97599	-7.5	0.157559	6	34.9228	-10.6764	-2.79929	27.7291	9.99301	b3844, b4117, b0010, b2997, b3927, b1380	ACt2rpp, ARGDC, FADRx, FE3Ri, FLVRx, GLYALDtpp, GLYtpp, LDH_D, UREAtpp
490	-58.9846	EX_succ_e	7.97599	-7.5	0.157559	6	34.9228	-10.6764	-2.79929	27.7291	9.99301	b3844, b4117, b0010, b3927, b1380, b0604	ACt2rpp, ARGDC, DSBGGT, FADRx, FE3Ri, FLVRx, GLYALDtpp, GLYtpp, LDH_D, TDSR2, UREAtpp
491	-58.9846	EX_succ_e	7.97599	-7.5	0.157559	6	34.9228	-10.6764	-2.79929	27.7291	9.99301	b3844, b4117, b0010, b0867, b3927, b1380	ACt2rpp, ARGDC, FADRx, FE3Ri, FLVRx, GLYALDtpp, GLYtpp, LDH_D, UREAtpp
492	-58.9846	EX_succ_e	7.97599	-7.5	0.157559	6	34.9228	-10.6764	-2.79929	27.7291	9.99301	b2458, b3844, b4117, b0010, b3927, b1380	ACt2rpp, ARGDC, FADRx, FE3Ri, FLVRx, GLYALDtpp, GLYtpp, LDH_D, UREAtpp
493	-58.9846	EX_succ_e	7.97599	-7.5	0.157559	6	34.9228	-10.6764	-2.79929	27.7291	9.99301	b3844, b4117, b0010, b3927, b1380, b1794	ACt2rpp, ARGDC, FADRx, FE3Ri, FLVRx, GLYALDtpp, GLYtpp, LDH_D, UREAtpp
494	-58.9846	EX_succ_e	7.97599	-7.5	0.157559	6	34.9228	-10.6764	-2.79929	27.7291	9.99301	b3844, b0010, b1709, b4115, b3927, b1380	ACt2rpp, ADOCBLabcpp, ARGAGMt7pp, CBIuabcpp, CBL1abcpp, FADRx, FE3Ri, FLVRx, GLYALDtpp, GLYtpp, LDH_D, UREAtpp
495	-58.9846	EX_succ_e	7.97599	-7.5	0.157559	6	34.9228	-10.6764	-2.79929	27.7291	9.99301	b3844, b0010, b4115, b0857, b3927, b1380	ACt2rpp, ARGAGMt7pp, FADRx, FE3Ri, FLVRx, GLYALDtpp, GLYtpp, LDH_D, UREAtpp
496	-58.9846	EX_succ_e	7.97599	-7.5	0.157559	6	34.9228	-10.6764	-2.79929	27.7291	9.99301	b3844, b0010, b4115, b3927, b1380, b2470	ACt2rpp, ARGAGMt7pp, FADRx, FE3Ri, FLVRx, GLYALDtpp, GLYtpp, LDH_D, UREAtpp
497	-58.9846	EX_succ_e	7.97599	-7.5	0.157559	6	34.9228	-10.6764	-2.79929	27.7291	9.99301	b3844, b4117, b0010, b3772, b3927, b1380	ACt2rpp, ARGDC, FADRx, FE3Ri, FLVRx, GLYALDtpp, GLYtpp, LDH_D, UREAtpp
498	-58.9846	EX_succ_e	7.97599	-7.5	0.157559	6	34.9228	-10.6764	-2.79929	27.7291	9.99301	b3844, b4192, b4117, b0010, b3927, b1380	ACt2rpp, ARGDC, ASCBPL, FADRx, FE3Ri, FLVRx, GLYALDtpp, GLYtpp, LDH_D, UREAtpp
499	-58.9846	EX_succ_e	7.97599	-7.5	0.157559	6	34.9228	-10.6764	-2.79929	27.7291	9.99301	b3844, b4117, b0010, b3927, b1380, b0418	ACt2rpp, ARGDC, FADRx, FE3Ri, FLVRx, GLYALDtpp, GLYtpp, LDH_D, UREAtpp
500	-58.9846	EX_succ_e	7.97599	-7.5	0.157559	6	34.9228	-10.6764	-2.79929	27.7291	9.99301	b3844, b4117, b1227, b0010, b3927, b1380	ACt2rpp, ARGDC, FADRx, FE3Ri, FLVRx, GLYALDtpp, GLYtpp, LDH_D, UREAtpp
501	-58.9846	EX_succ_e	7.97599	-7.5	0.157559	6	34.9228	-10.6764	-2.79929	27.7291	9.99301	b3844, b4117, b0010, b4033, b3927, b1380	14GLUCANabcpp, ACt2rpp, ARGDC, FADRx, FE3Ri, FLVRx, GLYALDtpp, GLYtpp, LDH_D, MALTHXabcpp, MALTPTabcpp, MALTTRabcpp, MALTTTRabcpp, MALTabcpp, UREAtpp
502	-58.9846	EX_succ_e	7.97599	-7.5	0.157559	6	34.9228	-10.6764	-2.79929	27.7291	9.99301	b3844, b4117, b0010, b3927, b1380, b1733	ACt2rpp, ARGDC, DC6PDA, FADRx, FE3Ri, FLVRx, GLYALDtpp, GLYtpp, LDH_D, UREAtpp
503	-58.9846	EX_succ_e	7.97599	-7.5	0.157559	6	34.9228	-10.6764	-2.79929	27.7291	9.99301	b3844, b4173, b0010, b4115, b3927, b1380	ACt2rpp, ARGAGMt7pp, FADRx, FE3Ri, FLVRx, GLYALDtpp, GLYtpp, LDH_D, UREAtpp
504	-58.9846	EX_succ_e	7.97599	-7.5	0.157559	6	34.9228	-10.6764	-2.79929	27.7291	9.99301	b3844, b2800, b0010, b4115, b3927, b1380	ACt2rpp, ARGAGMt7pp, FADRx, FE3Ri, FLVRx, GLYALDtpp, GLYtpp, LDH_D, UREAtpp
505	-58.9846	EX_succ_e	7.97599	-7.5	0.157559	6	34.9228	-10.6764	-2.79929	27.7291	9.99301	b3844, b0010, b4115, b1059, b3927, b1380	ACt2rpp, ARGAGMt7pp, FADRx, FE3Ri, FLVRx, GLYALDtpp, GLYtpp, LDH_D, MTRPOX, SARCOX, UREAtpp
506	-58.9846	EX_succ_e	7.97599	-7.5	0.157559	6	34.9228	-10.6764	-2.79929	27.7291	9.99301	b3844, b4117, b0010, b0158, b3927, b1380	ACt2rpp, ADOCBLabcpp, ARGDC, CBIuabcpp, CBL1abcpp, FADRx, FE3Ri, FLVRx, GLYALDtpp, GLYtpp, LDH_D, UREAtpp
507	-58.9846	EX_succ_e	7.97599	-7.5	0.157559	6	34.9228	-10.6764	-2.79929	27.7291	9.99301	b3844, b4117, b2053, b0010, b3927, b1380	ACt2rpp, ARGDC, FADRx, FE3Ri, FLVRx, GLYALDtpp, GLYtpp, GMAND, LDH_D, UREAtpp
508	-58.9846	EX_succ_e	7.97599	-7.5	0.157559	6	34.9228	-10.6764	-2.79929	27.7291	9.99301	b3222, b3844, b0010, b4115, b3927, b1380	ACt2rpp, AMANK, ARGAGMt7pp, FADRx, FE3Ri, FLVRx, GLYALDtpp, GLYtpp, LDH_D, UREAtpp
509	-58.9846	EX_succ_e	7.97599	-7.5	0.157559	6	34.9228	-10.6764	-2.79929	27.7291	9.99301	b3844, b0010, b4115, b3927, b1380, b1734	ACt2rpp, ARGAGMt7pp, FADRx, FE3Ri, FLVRx, GLYALDtpp, GLYtpp, LDH_D, MC6PH, UREAtpp
510	-58.9846	EX_succ_e	7.97599	-7.5	0.157559	6	34.9228	-10.6764	-2.79929	27.7291	9.99301	b3844, b4117, b0010, b3290, b3927, b1380	ACt2rpp, ARGDC, FADRx, FE3Ri, FLVRx, GLYALDtpp, GLYtpp, LDH_D, UREAtpp
511	-58.9846	EX_succ_e	7.97599	-7.5	0.157559	6	34.9228	-10.6764	-2.79929	27.7291	9.99301	b3844, b4117, b0010, b1329, b3927, b1380	ACt2rpp, ARGDC, FADRx, FE3Ri, FLVRx, GLYALDtpp, GLYtpp, LDH_D, UREAtpp
512	-58.9846	EX_succ_e	7.97599	-7.5	0.157559	6	34.9228	-10.6764	-2.79929	27.7291	9.99301	b3844, b4117, b0010, b3599, b3927, b1380	ACt2rpp, ARGDC, FADRx, FE3Ri, FLVRx, GLYALDtpp, GLYtpp, LDH_D, UREAtpp
513	-58.9846	EX_succ_e	7.97599	-7.5	0.157559	6	34.9228	-10.6764	-2.79929	27.7291	9.99301	b3844, b0010, b4115, b3927, b1380, b2843	ACt2rpp, ARGAGMt7pp, FADRx, FE3Ri, FLVRx, GLYALDtpp, GLYtpp, KDUI, LDH_D, UREAtpp
514	-58.9846	EX_succ_e	7.97599	-7.5	0.157559	6	34.9228	-10.6764	-2.79929	27.7291	9.99301	b3844, b0010, b4115, b1764, b3927, b1380	ACt2rpp, ARGAGMt7pp, FADRx, FE3Ri, FLVRx, GLYALDtpp, GLYtpp, LDH_D, SELNPS, UREAtpp
515	-58.9846	EX_succ_e	7.97599	-7.5	0.157559	6	34.9228	-10.6764	-2.79929	27.7291	9.99301	b3844, b0010, b4115, b4032, b3927, b1380	14GLUCANabcpp, ACt2rpp, ARGAGMt7pp, FADRx, FE3Ri, FLVRx, GLYALDtpp, GLYtpp, LDH_D, MALTHXabcpp, MALTPTabcpp, MALTTRabcpp, MALTTTRabcpp, MALTabcpp, UREAtpp
516	-58.9846	EX_succ_e	7.97599	-7.5	0.157559	6	34.9228	-10.6764	-2.79929	27.7291	9.99301	b3844, b4117, b3575, b0010, b3927, b1380	ACt2rpp, ARGDC, DOGULNR, FADRx, FE3Ri, FLVRx, GLYALDtpp, GLYtpp, LDH_D, UREAtpp
517	-58.9846	EX_succ_e	7.97599	-7.5	0.157559	6	34.9228	-10.6764	-2.79929	27.7291	9.99301	b3844, b0010, b4115, b0306, b3927, b1380	ACt2rpp, ARGAGMt7pp, FADRx, FE3Ri, FLVRx, GLYALDtpp, GLYtpp, LDH_D, UREAtpp
518	-58.9846	EX_succ_e	7.97599	-7.5	0.157559	6	34.9228	-10.6764	-2.79929	27.7291	9.99301	b3844, b4117, b1636, b0010, b3927, b1380	ACt2rpp, ARGDC, FADRx, FE3Ri, FLVRx, GLYALDtpp, GLYtpp, LDH_D, UREAtpp
519	-58.9846	EX_succ_e	7.97599	-7.5	0.157559	6	34.9228	-10.6764	-2.79929	27.7291	9.99301	b3844, b0010, b4115, b0573, b3927, b1380	ACt2rpp, AGt3, ARGAGMt7pp, CUt3, FADRx, FE3Ri, FLVRx, GLYALDtpp, GLYtpp, LDH_D, UREAtpp
520	-58.9846	EX_succ_e	7.97599	-7.5	0.157559	6	34.9228	-10.6764	-2.79929	27.7291	9.99301	b3844, b4117, b0010, b3927, b1380, b1634	ACt2rpp, ARGDC, FADRx, FE3Ri, FLVRx, GLYALDtpp, GLYtpp, LDH_D, UREAtpp
521	-58.9846	EX_succ_e	7.97599	-7.5	0.157559	6	34.9228	-10.6764	-2.79929	27.7291	9.99301	b3844, b4117, b2662, b0010, b3927, b1380	ACt2rpp, ARGDC, FADRx, FE3Ri, FLVRx, GLYALDtpp, GLYtpp, LDH_D, UREAtpp
522	-58.9846	EX_succ_e	7.97599	-7.5	0.157559	6	34.9228	-10.6764	-2.79929	27.7291	9.99301	b3844, b0010, b4115, b2169, b3927, b1380	ACt2rpp, ARGAGMt7pp, FADRx, FE3Ri, FLVRx, FRUptspp, GLYALDtpp, GLYtpp, LDH_D, UREAtpp
523	-58.9846	EX_succ_e	7.97599	-7.5	0.157559	6	34.9228	-10.6764	-2.79929	27.7291	9.99301	b3844, b0905, b0010, b4115, b3927, b1380	ACt2rpp, ARGAGMt7pp, FADRx, FE3Ri, FLVRx, GLYALDtpp, GLYtpp, LDH_D, UREAtpp
524	-58.9846	EX_succ_e	7.97599	-7.5	0.157559	6	34.9228	-10.6764	-2.79929	27.7291	9.99301	b3844, b4117, b0010, b0066, b3927, b1380	ACt2rpp, ARGDC, FADRx, FE3Ri, FLVRx, GLYALDtpp, GLYtpp, LDH_D, THMabcpp, UREAtpp
525	-58.9846	EX_succ_e	7.97599	-7.5	0.157559	6	34.9228	-10.6764	-2.79929	27.7291	9.99301	b3844, b2582, b4117, b0010, b3927, b1380	ACt2rpp, ARGDC, FADRx, FE3Ri, FLVRx, GLYALDtpp, GLYtpp, LDH_D, UREAtpp
526	-58.9846	EX_succ_e	7.97599	-7.5	0.157559	6	34.9228	-10.6764	-2.79929	27.7291	9.99301	b3844, b3223, b4117, b0010, b3927, b1380	ACt2rpp, AMANAPEr, ARGDC, FADRx, FE3Ri, FLVRx, GLYALDtpp, GLYtpp, LDH_D, UREAtpp
527	-58.9846	EX_succ_e	7.97599	-7.5	0.157559	6	34.9228	-10.6764	-2.79929	27.7291	9.99301	b3844, b4117, b0010, b2817, b3927, b1380	ACt2rpp, ARGDC, FADRx, FE3Ri, FLVRx, GLYALDtpp, GLYtpp, LDH_D, UREAtpp
528	-58.9846	EX_succ_e	7.97599	-7.5	0.157559	6	34.9228	-10.6764	-2.79929	27.7291	9.99301	b3844, b0010, b4115, b1606, b3927, b1380	ACt2rpp, ARGAGMt7pp, DHMPTR, FADRx, FE3Ri, FLVRx, GLYALDtpp, GLYtpp, LDH_D, UREAtpp
529	-58.9846	EX_succ_e	7.97599	-7.5	0.157559	6	34.9228	-10.6764	-2.79929	27.7291	9.99301	b3844, b1636, b0010, b4115, b3927, b1380	ACt2rpp, ARGAGMt7pp, FADRx, FE3Ri, FLVRx, GLYALDtpp, GLYtpp, LDH_D, UREAtpp
530	-58.9846	EX_succ_e	7.97599	-7.5	0.157559	6	34.9228	-10.6764	-2.79929	27.7291	9.99301	b3844, b0010, b4115, b0755, b3927, b1380	ACt2rpp, ARGAGMt7pp, FADRx, FE3Ri, FLVRx, GLYALDtpp, GLYtpp, LDH_D, UREAtpp
531	-58.9846	EX_succ_e	7.97599	-7.5	0.157559	6	34.9228	-10.6764	-2.79929	27.7291	9.99301	b3844, b0010, b0066, b4115, b3927, b1380	ACt2rpp, ARGAGMt7pp, FADRx, FE3Ri, FLVRx, GLYALDtpp, GLYtpp, LDH_D, THMabcpp, UREAtpp
532	-58.9846	EX_succ_e	7.97599	-7.5	0.157559	6	34.9228	-10.6764	-2.79929	27.7291	9.99301	b3844, b0010, b2425, b4115, b3927, b1380	ACt2rpp, ARGAGMt7pp, FADRx, FE3Ri, FLVRx, GLYALDtpp, GLYtpp, LDH_D, UREAtpp
533	-58.9846	EX_succ_e	7.97599	-7.5	0.157559	6	34.9228	-10.6764	-2.79929	27.7291	9.99301	b3844, b4117, b4244, b0010, b3927, b1380	ACt2rpp, ARGDC, FADRx, FE3Ri, FLVRx, GLYALDtpp, GLYtpp, LDH_D, UREAtpp
534	-58.9846	EX_succ_e	7.97599	-7.5	0.157559	6	34.9228	-10.6764	-2.79929	27.7291	9.99301	b3844, b4117, b3359, b0010, b3927, b1380	ACt2rpp, ARGDC, FADRx, FE3Ri, FLVRx, GLYALDtpp, GLYtpp, LDH_D, UREAtpp
535	-58.9846	EX_succ_e	7.97599	-7.5	0.157559	6	34.9228	-10.6764	-2.79929	27.7291	9.99301	b3844, b0010, b4115, b3927, b1380, b3656	ACt2rpp, ARGAGMt7pp, FADRx, FE3Ri, FLVRx, GLYALDtpp, GLYtpp, LDH_D, UREAtpp, XYHDL
536	-58.9846	EX_succ_e	7.97599	-7.5	0.157559	6	34.9228	-10.6764	-2.79929	27.7291	9.99301	b3844, b4117, b2540, b0010, b3927, b1380	ACt2rpp, ARGDC, CINNDO, FADRx, FE3Ri, FLVRx, GLYALDtpp, GLYtpp, LDH_D, PPPNDO, UREAtpp
537	-58.9846	EX_succ_e	7.97599	-7.5	0.157559	6	34.9228	-10.6764	-2.79929	27.7291	9.99301	b3844, b4117, b0997, b0010, b3927, b1380	ACt2rpp, ARGDC, FADRx, FE3Ri, FLVRx, GLYALDtpp, GLYtpp, LDH_D, UREAtpp
538	-58.9846	EX_succ_e	7.97599	-7.5	0.157559	6	34.9228	-10.6764	-2.79929	27.7291	9.99301	b3844, b0010, b4115, b3927, b1380, b1485	ACt2rpp, ARGAGMt7pp, FADRx, FE3Ri, FLVRx, GLYALDtpp, GLYtpp, LDH_D, UREAtpp
539	-58.9846	EX_succ_e	7.97599	-7.5	0.157559	6	34.9228	-10.6764	-2.79929	27.7291	9.99301	b3844, b0010, b4115, b3927, b1380, b0827	ACt2rpp, ARGAGMt7pp, BMOCOS, BWCOS, FADRx, FE3Ri, FLVRx, GLYALDtpp, GLYtpp, LDH_D, MOCOS, UREAtpp, WCOS
540	-58.9846	EX_succ_e	7.97599	-7.5	0.157559	6	34.9228	-10.6764	-2.79929	27.7291	9.99301	b3844, b4117, b0010, b3927, b1380, b2302	ACt2rpp, ARGDC, FADRx, FE3Ri, FLVRx, GLYALDtpp, GLYtpp, LDH_D, UREAtpp
541	-58.9846	EX_succ_e	7.97599	-7.5	0.157559	6	34.9228	-10.6764	-2.79929	27.7291	9.99301	b3844, b4117, b0010, b1927, b3927, b1380	AAMYL, ACt2rpp, ARGDC, FADRx, FE3Ri, FLVRx, GLYALDtpp, GLYtpp, LDH_D, UREAtpp
542	-58.9846	EX_succ_e	7.97599	-7.5	0.157559	6	34.9228	-10.6764	-2.79929	27.7291	9.99301	b3844, b4117, b0010, b3927, b1380, b1678	ACt2rpp, ARGDC, FADRx, FE3Ri, FLVRx, GLYALDtpp, GLYtpp, LDH_D, UREAtpp
543	-58.9846	EX_succ_e	7.97599	-7.5	0.157559	6	34.9228	-10.6764	-2.79929	27.7291	9.99301	b3197, b3844, b4117, b0010, b3927, b1380	ACt2rpp, ARGDC, FADRx, FE3Ri, FLVRx, GLYALDtpp, GLYtpp, LDH_D, UREAtpp
544	-58.9846	EX_succ_e	7.97599	-7.5	0.157559	6	34.9228	-10.6764	-2.79929	27.7291	9.99301	b3844, b0010, b4115, b3458, b3927, b1380	ACt2rpp, ARGAGMt7pp, FADRx, FE3Ri, FLVRx, GLYALDtpp, GLYtpp, LDH_D, UREAtpp
545	-58.9846	EX_succ_e	7.97599	-7.5	0.157559	6	34.9228	-10.6764	-2.79929	27.7291	9.99301	b3564, b3844, b4117, b0010, b3927, b1380	ACt2rpp, ARGDC, DXYLK, FADRx, FE3Ri, FLVRx, GLYALDtpp, GLYtpp, LDH_D, UREAtpp
546	-58.9846	EX_succ_e	7.97599	-7.5	0.157559	6	34.9228	-10.6764	-2.79929	27.7291	9.99301	b2465, b3844, b4117, b0010, b3927, b1380	ACt2rpp, ARGDC, FADRx, FE3Ri, FLVRx, GLYALDtpp, GLYtpp, LDH_D, UREAtpp
547	-58.9846	EX_succ_e	7.97599	-7.5	0.157559	6	34.9228	-10.6764	-2.79929	27.7291	9.99301	b3844, b4117, b0010, b2975, b3927, b1380	ACt2rpp, ARGDC, FADRx, FE3Ri, FLVRx, GLYALDtpp, GLYtpp, LDH_D, UREAtpp
548	-58.9846	EX_succ_e	7.97599	-7.5	0.157559	6	34.9228	-10.6764	-2.79929	27.7291	9.99301	b3844, b4374, b0010, b4115, b3927, b1380	ACt2rpp, ARGAGMt7pp, FADRx, FE3Ri, FLVRx, GLYALDtpp, GLYtpp, LDH_D, UREAtpp
549	-58.9846	EX_succ_e	7.97599	-7.5	0.157559	6	34.9228	-10.6764	-2.79929	27.7291	9.99301	b3844, b0010, b4115, b1927, b3927, b1380	AAMYL, ACt2rpp, ARGAGMt7pp, FADRx, FE3Ri, FLVRx, GLYALDtpp, GLYtpp, LDH_D, UREAtpp
550	-58.9846	EX_succ_e	7.97599	-7.5	0.157559	6	34.9228	-10.6764	-2.79929	27.7291	9.99301	b3844, b0010, b4115, b0752, b3927, b1380	ACt2rpp, ARGAGMt7pp, FADRx, FE3Ri, FLVRx, GLYALDtpp, GLYtpp, LDH_D, UREAtpp
551	-58.9846	EX_succ_e	7.97599	-7.5	0.157559	6	34.9228	-10.6764	-2.79929	27.7291	9.99301	b3844, b0010, b4115, b3748, b3927, b1380	ACt2rpp, ARGAGMt7pp, FADRx, FE3Ri, FLVRx, GLYALDtpp, GLYtpp, LDH_D, UREAtpp
552	-58.9846	EX_succ_e	7.97599	-7.5	0.157559	6	34.9228	-10.6764	-2.79929	27.7291	9.99301	b3844, b4117, b0010, b3739, b3927, b1380	ACt2rpp, ARGDC, FADRx, FE3Ri, FLVRx, GLYALDtpp, GLYtpp, LDH_D, UREAtpp
553	-58.9846	EX_succ_e	7.97599	-7.5	0.157559	6	34.9228	-10.6764	-2.79929	27.7291	9.99301	b3844, b4117, b0010, b2789, b3927, b1380	ACt2rpp, ARGDC, FADRx, FE3Ri, FLVRx, GLYALDtpp, GLYtpp, LDH_D, UREAtpp
554	-58.9846	EX_succ_e	7.97599	-7.5	0.157559	6	34.9228	-10.6764	-2.79929	27.7291	9.99301	b3844, b4117, b0010, b3577, b3927, b1380	23DOGULNt4pp, ACt2rpp, ARGDC, FADRx, FE3Ri, FLVRx, GLYALDtpp, GLYtpp, LDH_D, UREAtpp, XYLUt2pp
555	-58.9846	EX_succ_e	7.97599	-7.5	0.157559	6	34.9228	-10.6764	-2.79929	27.7291	9.99301	b3844, b0010, b4115, b3927, b0484, b1380	ACt2rpp, ARGAGMt7pp, CU1abcpp, FADRx, FE3Ri, FLVRx, GLYALDtpp, GLYtpp, LDH_D, UREAtpp
556	-58.9846	EX_succ_e	7.97599	-7.5	0.157559	6	34.9228	-10.6764	-2.79929	27.7291	9.99301	b3844, b0010, b4115, b4055, b3927, b1380	ACt2rpp, ARGAGMt7pp, FADRx, FE3Ri, FLVRx, GLYALDtpp, GLYtpp, LDH_D, TYRPpp, UREAtpp
557	-58.9846	EX_succ_e	7.97599	-7.5	0.157559	6	34.9228	-10.6764	-2.79929	27.7291	9.99301	b3844, b4117, b0010, b4544, b3927, b1380	ACt2rpp, ARGDC, FADRx, FE3Ri, FLVRx, GLYALDtpp, GLYtpp, LDH_D, ULA4Ntppi, UREAtpp
558	-58.9846	EX_succ_e	7.97599	-7.5	0.157559	6	34.9228	-10.6764	-2.79929	27.7291	9.99301	b3844, b4117, b0010, b1711, b3927, b1380	ACt2rpp, ADOCBLabcpp, ARGDC, CBIuabcpp, CBL1abcpp, FADRx, FE3Ri, FLVRx, GLYALDtpp, GLYtpp, LDH_D, UREAtpp
559	-58.9846	EX_succ_e	7.97599	-7.5	0.157559	6	34.9228	-10.6764	-2.79929	27.7291	9.99301	b3844, b0010, b4115, b3927, b1380, b0613	ACt2rpp, ARGAGMt7pp, FADRx, FE3Ri, FLVRx, GLYALDtpp, GLYtpp, LDH_D, TPRDCOAS, UREAtpp
560	-58.9846	EX_succ_e	7.97599	-7.5	0.157559	6	34.9228	-10.6764	-2.79929	27.7291	9.99301	b3844, b4117, b0010, b3927, b1380, b0577	ACt2rpp, ARGDC, FADRx, FE3Ri, FLVRx, GLYALDtpp, GLYtpp, LDH_D, UREAtpp
561	-58.9846	EX_succ_e	7.97599	-7.5	0.157559	6	34.9228	-10.6764	-2.79929	27.7291	9.99301	b3844, b0010, b4115, b1245, b3927, b1380	ACt2rpp, ARGAGMt7pp, FADRx, FE3Ri, FLVRx, GLYALDtpp, GLYtpp, LDH_D, UREAtpp
562	-58.9846	EX_succ_e	7.97599	-7.5	0.157559	6	34.9228	-10.6764	-2.79929	27.7291	9.99301	b3844, b0010, b4115, b3927, b1380, b3881	6D6SPA, ACt2rpp, ARGAGMt7pp, FADRx, FE3Ri, FLVRx, GLYALDtpp, GLYtpp, LDH_D, UREAtpp
563	-58.9846	EX_succ_e	7.97599	-7.5	0.157559	6	34.9228	-10.6764	-2.79929	27.7291	9.99301	b3844, b4117, b0010, b2934, b3927, b1380	ACt2rpp, ARGDC, FADRx, FE3Ri, FLVRx, GLYALDtpp, GLYtpp, LDH_D, UREAtpp
564	-58.9846	EX_succ_e	7.97599	-7.5	0.157559	6	34.9228	-10.6764	-2.79929	27.7291	9.99301	b3844, b0010, b3579, b4115, b3927, b1380	23DOGULNt4pp, ACt2rpp, ARGAGMt7pp, FADRx, FE3Ri, FLVRx, GLYALDtpp, GLYtpp, LDH_D, UREAtpp, XYLUt2pp
565	-58.9846	EX_succ_e	7.97599	-7.5	0.157559	6	34.9228	-10.6764	-2.79929	27.7291	9.99301	b3844, b4117, b0010, b3128, b3927, b1380	ACt2rpp, ARGDC, FADRx, FE3Ri, FLVRx, GALCTD, GLYALDtpp, GLYtpp, LDH_D, UREAtpp
566	-58.9846	EX_succ_e	7.97599	-7.5	0.157559	6	34.9228	-10.6764	-2.79929	27.7291	9.99301	b3844, b4117, b0010, b0425, b3927, b1380	ACt2rpp, ARGDC, FADRx, FE3Ri, FLVRx, GLYALDtpp, GLYtpp, LDH_D, UREAtpp
567	-58.9846	EX_succ_e	7.97599	-7.5	0.157559	6	34.9228	-10.6764	-2.79929	27.7291	9.99301	b3844, b4117, b0010, b3927, b1380, b2497	ACt2rpp, ARGDC, FADRx, FE3Ri, FLVRx, GLYALDtpp, GLYtpp, LDH_D, UREAtpp
568	-58.9846	EX_succ_e	7.97599	-7.5	0.157559	6	34.9228	-10.6764	-2.79929	27.7291	9.99301	b3844, b2203, b0010, b4115, b3927, b1380	ACt2rpp, ARGAGMt7pp, FADRx, FE3Ri, FLVRx, GLYALDtpp, GLYtpp, LDH_D, NO3R1bpp, NO3R2bpp, UREAtpp
569	-58.9846	EX_succ_e	7.97599	-7.5	0.157559	6	34.9228	-10.6764	-2.79929	27.7291	9.99301	b3844, b0010, b1711, b4115, b3927, b1380	ACt2rpp, ADOCBLabcpp, ARGAGMt7pp, CBIuabcpp, CBL1abcpp, FADRx, FE3Ri, FLVRx, GLYALDtpp, GLYtpp, LDH_D, UREAtpp
570	-58.9846	EX_succ_e	7.97599	-7.5	0.157559	6	34.9228	-10.6764	-2.79929	27.7291	9.99301	b3844, b4117, b3117, b0010, b3927, b1380	ACt2rpp, ARGDC, FADRx, FE3Ri, FLVRx, GLYALDtpp, GLYtpp, LDH_D, UREAtpp
571	-58.9846	EX_succ_e	7.97599	-7.5	0.157559	6	34.9228	-10.6764	-2.79929	27.7291	9.99301	b2781, b3844, b4117, b0010, b3927, b1380	ACt2rpp, ARGDC, FADRx, FE3Ri, FLVRx, GLYALDtpp, GLYtpp, LDH_D, UREAtpp
572	-58.9846	EX_succ_e	7.97599	-7.5	0.157559	6	34.9228	-10.6764	-2.79929	27.7291	9.99301	b2716, b3844, b4117, b0010, b3927, b1380	ACt2rpp, ARGDC, FADRx, FE3Ri, FLVRx, GLYALDtpp, GLYtpp, LDH_D, UREAtpp
573	-58.9846	EX_succ_e	7.97599	-7.5	0.157559	6	34.9228	-10.6764	-2.79929	27.7291	9.99301	b3844, b4117, b0010, b0863, b3927, b1380	ACt2rpp, ARGDC, FADRx, FE3Ri, FLVRx, GLYALDtpp, GLYtpp, LDH_D, UREAtpp
574	-58.9846	EX_succ_e	7.97599	-7.5	0.157559	6	34.9228	-10.6764	-2.79929	27.7291	9.99301	b3844, b4117, b0010, b2995, b3927, b1380	ACt2rpp, ARGDC, FADRx, FE3Ri, FLVRx, GLYALDtpp, GLYtpp, LDH_D, UREAtpp
575	-58.9846	EX_succ_e	7.97599	-7.5	0.157559	6	34.9228	-10.6764	-2.79929	27.7291	9.99301	b3844, b4117, b0010, b0862, b3927, b1380	ACt2rpp, ARGDC, FADRx, FE3Ri, FLVRx, GLYALDtpp, GLYtpp, LDH_D, UREAtpp
576	-58.9846	EX_succ_e	7.97599	-7.5	0.157559	6	34.9228	-10.6764	-2.79929	27.7291	9.99301	b1676, b3844, b4117, b0010, b3927, b1380	ACt2rpp, ARGDC, FADRx, FE3Ri, FLVRx, GLYALDtpp, GLYtpp, LDH_D, UREAtpp
577	-58.9846	EX_succ_e	7.97599	-7.5	0.157559	6	34.9228	-10.6764	-2.79929	27.7291	9.99301	b3844, b4117, b3583, b0010, b3927, b1380	ACt2rpp, ARGDC, FADRx, FE3Ri, FLVRx, GLYALDtpp, GLYtpp, LDH_D, UREAtpp
578	-58.9846	EX_succ_e	7.97599	-7.5	0.157559	6	34.9228	-10.6764	-2.79929	27.7291	9.99301	b3844, b0010, b4115, b2536, b3927, b1380	ACt2rpp, ARGAGMt7pp, FADRx, FE3Ri, FLVRx, GLYALDtpp, GLYtpp, LDH_D, PPPNt2rpp, UREAtpp
579	-58.9846	EX_succ_e	7.97599	-7.5	0.157559	6	34.9228	-10.6764	-2.79929	27.7291	9.99301	b3844, b0010, b4115, b0854, b3927, b1380	ACt2rpp, ARGAGMt7pp, FADRx, FE3Ri, FLVRx, GLYALDtpp, GLYtpp, LDH_D, UREAtpp
580	-58.9846	EX_succ_e	7.97599	-7.5	0.157559	6	34.9228	-10.6764	-2.79929	27.7291	9.99301	b3844, b4117, b1096, b0010, b3927, b1380	ACt2rpp, ARGDC, FADRx, FE3Ri, FLVRx, GLYALDtpp, GLYtpp, LDH_D, UREAtpp
581	-58.9846	EX_succ_e	7.97599	-7.5	0.157559	6	34.9228	-10.6764	-2.79929	27.7291	9.99301	b3844, b0010, b4115, b1123, b3927, b1380	ACt2rpp, ARGAGMt7pp, FADRx, FE3Ri, FLVRx, GLYALDtpp, GLYtpp, LDH_D, UREAtpp
582	-58.9846	EX_succ_e	7.97599	-7.5	0.157559	6	34.9228	-10.6764	-2.79929	27.7291	9.99301	b3844, b4117, b1872, b0010, b3927, b1380	ACt2rpp, ARGDC, DMSOR1pp, DMSOR2pp, FADRx, FE3Ri, FLVRx, GLYALDtpp, GLYtpp, LDH_D, UREAtpp
583	-58.9846	EX_succ_e	7.97599	-7.5	0.157559	6	34.9228	-10.6764	-2.79929	27.7291	9.99301	b3844, b4117, b0010, b0365, b3927, b1380	ACt2rpp, ARGDC, FADRx, FE3Ri, FLVRx, GLYALDtpp, GLYtpp, LDH_D, TAURabcpp, UREAtpp
584	-58.9846	EX_succ_e	7.97599	-7.5	0.157559	6	34.9228	-10.6764	-2.79929	27.7291	9.99301	b3844, b0010, b4115, b0572, b3927, b1380	ACt2rpp, AGt3, ARGAGMt7pp, CUt3, FADRx, FE3Ri, FLVRx, GLYALDtpp, GLYtpp, LDH_D, UREAtpp
585	-58.9846	EX_succ_e	7.97599	-7.5	0.157559	6	34.9228	-10.6764	-2.79929	27.7291	9.99301	b3844, b4117, b0010, b0849, b3927, b1380	ACt2rpp, ARGDC, FADRx, FE3Ri, FLVRx, GLYALDtpp, GLYtpp, LDH_D, UREAtpp
586	-58.9846	EX_succ_e	7.97599	-7.5	0.157559	6	34.9228	-10.6764	-2.79929	27.7291	9.99301	b3844, b0010, b4115, b3927, b2147, b1380	ACt2rpp, ARGAGMt7pp, DURADx, FADRx, FE3Ri, FLVRx, GLYALDtpp, GLYtpp, LDH_D, UREAtpp
587	-58.9846	EX_succ_e	7.97599	-7.5	0.157559	6	34.9228	-10.6764	-2.79929	27.7291	9.99301	b3844, b4117, b0010, b1250, b3927, b1380	ACt2rpp, ARGDC, FADRx, FE3Ri, FLVRx, GLYALDtpp, GLYtpp, LDH_D, UREAtpp
588	-58.9846	EX_succ_e	7.97599	-7.5	0.157559	6	34.9228	-10.6764	-2.79929	27.7291	9.99301	b3844, b4117, b4352, b0010, b3927, b1380	ACt2rpp, ARGDC, FADRx, FE3Ri, FLVRx, GLYALDtpp, GLYtpp, LDH_D, UREAtpp
589	-58.9846	EX_succ_e	7.97599	-7.5	0.157559	6	34.9228	-10.6764	-2.79929	27.7291	9.99301	b3844, b4117, b0010, b1818, b3927, b1380	2DGLCptspp, ACMANAptspp, ACt2rpp, ARGDC, FADRx, FE3Ri, FLVRx, FRUpts2pp, GAMptspp, GLYALDtpp, GLYtpp, LDH_D, MANptspp, UREAtpp
590	-58.9846	EX_succ_e	7.97599	-7.5	0.157559	6	34.9228	-10.6764	-2.79929	27.7291	9.99301	b3844, b4117, b3061, b0010, b3927, b1380	ACt2rpp, ARGDC, FADRx, FE3Ri, FLVRx, GLYALDtpp, GLYtpp, LDH_D, TARTD, UREAtpp
591	-58.9846	EX_succ_e	7.97599	-7.5	0.157559	6	34.9228	-10.6764	-2.79929	27.7291	9.99301	b2421, b3844, b4117, b0010, b3927, b1380	ACt2rpp, ARGDC, FADRx, FE3Ri, FLVRx, GLYALDtpp, GLYtpp, LDH_D, UREAtpp
592	-58.9846	EX_succ_e	7.97599	-7.5	0.157559	6	34.9228	-10.6764	-2.79929	27.7291	9.99301	b3844, b0368, b4117, b0010, b3927, b1380	ACt2rpp, ARGDC, FADRx, FE3Ri, FLVRx, GLYALDtpp, GLYtpp, LDH_D, TAUDO, UREAtpp
593	-58.9846	EX_succ_e	7.97599	-7.5	0.157559	6	34.9228	-10.6764	-2.79929	27.7291	9.99301	b3844, b4117, b0010, b3927, b1380, b0576	ACt2rpp, ARGDC, FADRx, FE3Ri, FLVRx, GLYALDtpp, GLYtpp, LDH_D, UREAtpp
594	-58.9846	EX_succ_e	7.97599	-7.5	0.157559	6	34.9228	-10.6764	-2.79929	27.7291	9.99301	b3844, b0010, b4115, b3927, b1380, b2682	ACt2rpp, ARGAGMt7pp, FADRx, FE3Ri, FLVRx, GLYALDtpp, GLYtpp, LDH_D, UREAtpp
595	-58.9846	EX_succ_e	7.97599	-7.5	0.157559	6	34.9228	-10.6764	-2.79929	27.7291	9.99301	b3844, b0010, b4115, b1197, b3927, b1380	ACt2rpp, ARGAGMt7pp, FADRx, FE3Ri, FLVRx, GLYALDtpp, GLYtpp, LDH_D, TREHpp, UREAtpp
596	-58.9846	EX_succ_e	7.97599	-7.5	0.157559	6	34.9228	-10.6764	-2.79929	27.7291	9.99301	b3844, b4117, b0010, b4120, b3927, b1380	ACt2rpp, ARGDC, FADRx, FE3Ri, FLVRx, GLYALDtpp, GLYtpp, LDH_D, UREAtpp
597	-58.9846	EX_succ_e	7.97599	-7.5	0.157559	6	34.9228	-10.6764	-2.79929	27.7291	9.99301	b3844, b0348, b4117, b0010, b3927, b1380	ACt2rpp, ARGDC, DHCINDO, FADRx, FE3Ri, FLVRx, GLYALDtpp, GLYtpp, HPPPNDO, LDH_D, UREAtpp
598	-58.9846	EX_succ_e	7.97599	-7.5	0.157559	6	34.9228	-10.6764	-2.79929	27.7291	9.99301	b3844, b4117, b0010, b3927, b1380, b2010	ACt2rpp, ARGDC, FADRx, FE3Ri, FLVRx, GLYALDtpp, GLYtpp, LDH_D, UREAtpp
599	-58.9846	EX_succ_e	7.97599	-7.5	0.157559	6	34.9228	-10.6764	-2.79929	27.7291	9.99301	b3925, b3844, b4117, b0010, b3927, b1380	ACt2rpp, ARGDC, FADRx, FE3Ri, FLVRx, GLYALDtpp, GLYtpp, LDH_D, UREAtpp
600	-58.9846	EX_succ_e	7.97599	-7.5	0.157559	6	34.9228	-10.6764	-2.79929	27.7291	9.99301	b3844, b2204, b0010, b4115, b3927, b1380	ACt2rpp, ARGAGMt7pp, FADRx, FE3Ri, FLVRx, GLYALDtpp, GLYtpp, LDH_D, NO3R1bpp, UREAtpp
601	-58.9846	EX_succ_e	7.97599	-7.5	0.157559	6	34.9228	-10.6764	-2.79929	27.7291	9.99301	b1588, b3844, b4117, b0010, b3927, b1380	ACt2rpp, ARGDC, FADRx, FE3Ri, FLVRx, GLYALDtpp, GLYtpp, LDH_D, SELR, UREAtpp
602	-58.9846	EX_succ_e	7.97599	-7.5	0.157559	6	34.9228	-10.6764	-2.79929	27.7291	9.99301	b3844, b0010, b4115, b2702, b3927, b1380	ACt2rpp, ARGAGMt7pp, FADRx, FE3Ri, FLVRx, GLYALDtpp, GLYtpp, LDH_D, SBTptspp, UREAtpp
603	-58.9846	EX_succ_e	7.97599	-7.5	0.157559	6	34.9228	-10.6764	-2.79929	27.7291	9.99301	b3844, b4117, b0010, b0855, b3927, b1380	ACt2rpp, ARGDC, FADRx, FE3Ri, FLVRx, GLYALDtpp, GLYtpp, LDH_D, UREAtpp
604	-58.9846	EX_succ_e	7.97599	-7.5	0.157559	6	34.9228	-10.6764	-2.79929	27.7291	9.99301	b3844, b0010, b4115, b0650, b3927, b1380	ACt2rpp, ARGAGMt7pp, FADRx, FE3Ri, FLVRx, GLYALDtpp, GLYtpp, LDH_D, UREAtpp
605	-58.9846	EX_succ_e	7.97599	-7.5	0.157559	6	34.9228	-10.6764	-2.79929	27.7291	9.99301	b3844, b4117, b0010, b3578, b3927, b1380	23DOGULNt4pp, ACt2rpp, ARGDC, FADRx, FE3Ri, FLVRx, GLYALDtpp, GLYtpp, LDH_D, UREAtpp, XYLUt2pp
606	-58.9846	EX_succ_e	7.97599	-7.5	0.157559	6	34.9228	-10.6764	-2.79929	27.7291	9.99301	b3844, b0010, b4115, b2177, b3927, b1380	ACt2rpp, ARGAGMt7pp, FADRx, FE3Ri, FLVRx, GLYALDtpp, GLYtpp, LDH_D, UREAtpp
607	-58.9846	EX_succ_e	7.97599	-7.5	0.157559	6	34.9228	-10.6764	-2.79929	27.7291	9.99301	b3225, b3844, b4117, b0010, b3927, b1380	ACNML, ACt2rpp, ARGDC, FADRx, FE3Ri, FLVRx, GLYALDtpp, GLYtpp, LDH_D, UREAtpp
608	-58.9846	EX_succ_e	7.97599	-7.5	0.157559	6	34.9228	-10.6764	-2.79929	27.7291	9.99301	b3844, b4117, b0010, b3829, b3927, b1380	ACt2rpp, ARGDC, FADRx, FE3Ri, FLVRx, GLYALDtpp, GLYtpp, LDH_D, UREAtpp
609	-58.9846	EX_succ_e	7.97599	-7.5	0.157559	6	34.9228	-10.6764	-2.79929	27.7291	9.99301	b3844, b4117, b0010, b4115, b3927, b1380	ACt2rpp, ARGAGMt7pp, ARGDC, FADRx, FE3Ri, FLVRx, GLYALDtpp, GLYtpp, LDH_D, UREAtpp
610	-58.9846	EX_succ_e	7.97599	-7.5	0.157559	6	34.9228	-10.6764	-2.79929	27.7291	9.99301	b3844, b4117, b0010, b2179, b3927, b1380	ACt2rpp, ARGDC, FADRx, FE3Ri, FLVRx, GLYALDtpp, GLYtpp, LDH_D, UREAtpp
611	-58.9846	EX_succ_e	7.97599	-7.5	0.157559	6	34.9228	-10.6764	-2.79929	27.7291	9.99301	b3844, b0010, b4115, b3927, b1380, b3893	ACt2rpp, ARGAGMt7pp, FADRx, FE3Ri, FLVRx, GLYALDtpp, GLYtpp, LDH_D, UREAtpp
612	-58.9846	EX_succ_e	7.97599	-7.5	0.157559	6	34.9228	-10.6764	-2.79929	27.7291	9.99301	b2502, b3844, b4117, b0010, b3927, b1380	ACt2rpp, ARGDC, FADRx, FE3Ri, FLVRx, GLYALDtpp, GLYtpp, LDH_D, UREAtpp
613	-58.9846	EX_succ_e	7.97599	-7.5	0.157559	6	34.9228	-10.6764	-2.79929	27.7291	9.99301	b0895, b3844, b4117, b0010, b3927, b1380	ACt2rpp, ARGDC, DMSOR2, FADRx, FE3Ri, FLVRx, GLYALDtpp, GLYtpp, LDH_D, TMAOR2, UREAtpp
614	-58.9846	EX_succ_e	7.97599	-7.5	0.157559	6	34.9228	-10.6764	-2.79929	27.7291	9.99301	b3844, b0010, b4115, b0936, b3927, b1380	ACt2rpp, ARGAGMt7pp, ETHSO3abcpp, FADRx, FE3Ri, FLVRx, GLYALDtpp, GLYtpp, LDH_D, MSO3abcpp, SULFACabcpp, UREAtpp
615	-58.9846	EX_succ_e	7.97599	-7.5	0.157559	6	34.9228	-10.6764	-2.79929	27.7291	9.99301	b3844, b4117, b0010, b3927, b1380, b1483	ACt2rpp, ARGDC, FADRx, FE3Ri, FLVRx, GLYALDtpp, GLYtpp, LDH_D, UREAtpp
616	-58.9846	EX_succ_e	7.97599	-7.5	0.157559	6	34.9228	-10.6764	-2.79929	27.7291	9.99301	b3844, b4117, b2797, b0010, b3927, b1380	ACt2rpp, ARGDC, FADRx, FE3Ri, FLVRx, GLYALDtpp, GLYtpp, LDH_D, UREAtpp
617	-58.9846	EX_succ_e	7.97599	-7.5	0.157559	6	34.9228	-10.6764	-2.79929	27.7291	9.99301	b3844, b0010, b4115, b0574, b3927, b1380	ACt2rpp, AGt3, ARGAGMt7pp, CUt3, FADRx, FE3Ri, FLVRx, GLYALDtpp, GLYtpp, LDH_D, UREAtpp
618	-58.9846	EX_succ_e	7.97599	-7.5	0.157559	6	34.9228	-10.6764	-2.79929	27.7291	9.99301	b3844, b4117, b0010, b0067, b3927, b1380	ACt2rpp, ARGDC, FADRx, FE3Ri, FLVRx, GLYALDtpp, GLYtpp, LDH_D, THMabcpp, UREAtpp
619	-58.9846	EX_succ_e	7.97599	-7.5	0.157559	6	34.9228	-10.6764	-2.79929	27.7291	9.99301	b3844, b0010, b4115, b3927, b1380, b4268	ACt2rpp, ARGAGMt7pp, FADRx, FE3Ri, FLVRx, GLYALDtpp, GLYtpp, LDH_D, UREAtpp
620	-58.9846	EX_succ_e	7.97599	-7.5	0.157559	6	34.9228	-10.6764	-2.79929	27.7291	9.99301	b3844, b4117, b2738, b0010, b3927, b1380	ACt2rpp, ARGDC, FADRx, FE3Ri, FLVRx, GLYALDtpp, GLYtpp, LDH_D, UREAtpp
621	-58.9846	EX_succ_e	7.97599	-7.5	0.157559	6	34.9228	-10.6764	-2.79929	27.7291	9.99301	b3844, b4117, b0010, b3927, b1380, b1484	ACt2rpp, ARGDC, FADRx, FE3Ri, FLVRx, GLYALDtpp, GLYtpp, LDH_D, UREAtpp
622	-58.9846	EX_succ_e	7.97599	-7.5	0.157559	6	34.9228	-10.6764	-2.79929	27.7291	9.99301	b3844, b4117, b0010, b4079, b3927, b1380	ACt2rpp, ARGDC, FADRx, FE3Ri, FHL, FLVRx, GLYALDtpp, GLYtpp, LDH_D, UREAtpp
623	-58.9846	EX_succ_e	7.97599	-7.5	0.157559	6	34.9228	-10.6764	-2.79929	27.7291	9.99301	b3844, b0010, b4115, b3571, b3927, b1380	AAMYLpp, ACt2rpp, ARGAGMt7pp, FADRx, FE3Ri, FLVRx, GLYALDtpp, GLYtpp, LDH_D, UREAtpp
624	-58.9846	EX_succ_e	7.97599	-7.5	0.157559	6	34.9228	-10.6764	-2.79929	27.7291	9.99301	b3844, b4117, b0010, b1781, b3927, b1380	ACt2rpp, ARGDC, FADRx, FE3Ri, FLVRx, GLYALDtpp, GLYtpp, LDH_D, UREAtpp
625	-58.9846	EX_succ_e	7.97599	-7.5	0.157559	6	34.9228	-10.6764	-2.79929	27.7291	9.99301	b3844, b3826, b0010, b4115, b3927, b1380	ACt2rpp, ARGAGMt7pp, FADRx, FE3Ri, FLVRx, GLYALDtpp, GLYtpp, LDH_D, UREAtpp
626	-58.9846	EX_succ_e	7.97599	-7.5	0.157559	6	34.9228	-10.6764	-2.79929	27.7291	9.99301	b3844, b4117, b0010, b3927, b1380, b4392	ACt2rpp, ARGDC, FADRx, FE3Ri, FLVRx, GLYALDtpp, GLYtpp, LDH_D, UREAtpp
627	-58.9846	EX_succ_e	7.97599	-7.5	0.157559	6	34.9228	-10.6764	-2.79929	27.7291	9.99301	b3844, b4117, b0010, b3567, b3927, b1380	ACt2rpp, ARGDC, FADRx, FE3Ri, FLVRx, GLYALDtpp, GLYtpp, LDH_D, UREAtpp, XYLabcpp
628	-58.9846	EX_succ_e	7.97599	-7.5	0.157559	6	34.9228	-10.6764	-2.79929	27.7291	9.99301	b3844, b3902, b0010, b4115, b3927, b1380	ACt2rpp, ARGAGMt7pp, FADRx, FE3Ri, FLVRx, GLYALDtpp, GLYtpp, LDH_D, RMPA, UREAtpp
629	-58.9846	EX_succ_e	7.97599	-7.5	0.157559	6	34.9228	-10.6764	-2.79929	27.7291	9.99301	b3844, b4117, b0010, b3927, b1380, b0874	ACt2rpp, ARGDC, FADRx, FE3Ri, FLVRx, GLYALDtpp, GLYtpp, LDH_D, UREAtpp
630	-58.9846	EX_succ_e	7.97599	-7.5	0.157559	6	34.9228	-10.6764	-2.79929	27.7291	9.99301	b4054, b3844, b0010, b4115, b3927, b1380	ACt2rpp, ARGAGMt7pp, FADRx, FE3Ri, FLVRx, GLYALDtpp, GLYtpp, LDH_D, UREAtpp
631	-58.9846	EX_succ_e	7.97599	-7.5	0.157559	6	34.9228	-10.6764	-2.79929	27.7291	9.99301	b3426, b3844, b0010, b4115, b3927, b1380	ACt2rpp, ARGAGMt7pp, FADRx, FE3Ri, FLVRx, GLYALDtpp, GLYtpp, LDH_D, UREAtpp
632	-58.9846	EX_succ_e	7.97599	-7.5	0.157559	6	34.9228	-10.6764	-2.79929	27.7291	9.99301	b3844, b4117, b0010, b3927, b1380, b2154	ACt2rpp, ARGDC, FADRx, FE3Ri, FLVRx, GLYALDtpp, GLYtpp, LDH_D, UREAtpp
633	-58.9846	EX_succ_e	7.97599	-7.5	0.157559	6	34.9228	-10.6764	-2.79929	27.7291	9.99301	b3844, b0010, b4115, b3927, b1380, b3182	ACt2rpp, ARGAGMt7pp, FADRx, FE3Ri, FLVRx, GLYALDtpp, GLYtpp, LDH_D, UREAtpp
634	-58.9846	EX_succ_e	7.97599	-7.5	0.157559	6	34.9228	-10.6764	-2.79929	27.7291	9.99301	b3844, b0010, b4115, b3927, b1380, b4101	ACt2rpp, ARGAGMt7pp, ARMEPNS, FADRx, FE3Ri, FLVRx, GLYALDtpp, GLYtpp, LDH_D, UREAtpp
635	-58.9846	EX_succ_e	7.97599	-7.5	0.157559	6	34.9228	-10.6764	-2.79929	27.7291	9.99301	b3844, b0010, b4260, b4115, b3927, b1380	ACt2rpp, ARGAGMt7pp, FADRx, FE3Ri, FLVRx, GLYALDtpp, GLYtpp, LDH_D, UREAtpp
636	-58.9846	EX_succ_e	7.97599	-7.5	0.157559	6	34.9228	-10.6764	-2.79929	27.7291	9.99301	b3844, b0010, b4115, b3927, b1380, b1006	ACt2rpp, ARGAGMt7pp, FADRx, FE3Ri, FLVRx, GLYALDtpp, GLYtpp, LDH_D, UREAtpp
637	-58.9846	EX_succ_e	7.97599	-7.5	0.157559	6	34.9228	-10.6764	-2.79929	27.7291	9.99301	b3844, b4117, b0010, b3927, b1380, b0444	ACt2rpp, ARGDC, CCGS, FADRx, FE3Ri, FLVRx, GLYALDtpp, GLYtpp, LDH_D, UREAtpp
638	-58.9846	EX_succ_e	7.97599	-7.5	0.157559	6	34.9228	-10.6764	-2.79929	27.7291	9.99301	b3844, b4146, b0010, b4115, b3927, b1380	ACt2rpp, ARGAGMt7pp, FADRx, FE3Ri, FLVRx, GLYALDtpp, GLYtpp, LDH_D, LYSAM, UREAtpp
639	-58.9846	EX_succ_e	7.97599	-7.5	0.157559	6	34.9228	-10.6764	-2.79929	27.7291	9.99301	b3721, b3844, b4117, b0010, b3927, b1380	ACt2rpp, ARGDC, FADRx, FE3Ri, FLVRx, GLYALDtpp, GLYtpp, LDH_D, UREAtpp
640	-58.9846	EX_succ_e	7.97599	-7.5	0.157559	6	34.9228	-10.6764	-2.79929	27.7291	9.99301	b3844, b0010, b4115, b3927, b1380, b1661	ACt2rpp, ARGAGMt7pp, CFAS160E, CFAS160G, CFAS180E, CFAS180G, FADRx, FE3Ri, FLVRx, GLYALDtpp, GLYtpp, LDH_D, UREAtpp
641	-58.9846	EX_succ_e	7.97599	-7.5	0.157559	6	34.9228	-10.6764	-2.79929	27.7291	9.99301	b3844, b4117, b0010, b3927, b1380, b0784	ACt2rpp, ARGDC, FADRx, FE3Ri, FLVRx, GLYALDtpp, GLYtpp, LDH_D, MOADSUx, MPTS, UREAtpp
642	-58.9846	EX_succ_e	7.97599	-7.5	0.157559	6	34.9228	-10.6764	-2.79929	27.7291	9.99301	b3844, b0010, b4115, b4086, b3927, b1380	ACt2rpp, ALLabcpp, ARGAGMt7pp, FADRx, FE3Ri, FLVRx, GLYALDtpp, GLYtpp, LDH_D, UREAtpp
643	-58.9846	EX_succ_e	7.97599	-7.5	0.157559	6	34.9228	-10.6764	-2.79929	27.7291	9.99301	b2097, b3844, b4117, b0010, b3927, b1380	ACt2rpp, ARGDC, FADRx, FE3Ri, FLVRx, GLYALDtpp, GLYtpp, LDH_D, UREAtpp
644	-58.9846	EX_succ_e	7.97599	-7.5	0.157559	6	34.9228	-10.6764	-2.79929	27.7291	9.99301	b3844, b4117, b0010, b3478, b3927, b1380	ACt2rpp, ARGDC, FADRx, FE3Ri, FLVRx, GLYALDtpp, GLYtpp, LDH_D, UREAtpp
645	-58.9846	EX_succ_e	7.97599	-7.5	0.157559	6	34.9228	-10.6764	-2.79929	27.7291	9.99301	b3844, b4117, b0010, b3927, b1380, b3892	ACt2rpp, ARGDC, FADRx, FE3Ri, FLVRx, GLYALDtpp, GLYtpp, LDH_D, UREAtpp
646	-58.9846	EX_succ_e	7.97599	-7.5	0.157559	6	34.9228	-10.6764	-2.79929	27.7291	9.99301	b3844, b0010, b4115, b3927, b1380, b2794	ACt2rpp, ARGAGMt7pp, CDGR, FADRx, FE3Ri, FLVRx, GLYALDtpp, GLYtpp, LDH_D, UREAtpp
647	-58.9846	EX_succ_e	7.97599	-7.5	0.157559	6	34.9228	-10.6764	-2.79929	27.7291	9.99301	b3844, b4117, b0010, b3927, b0756, b1380	ACt2rpp, ARGDC, FADRx, FE3Ri, FLVRx, GALM2pp, GLYALDtpp, GLYtpp, LDH_D, UREAtpp
648	-58.9846	EX_succ_e	7.97599	-7.5	0.157559	6	34.9228	-10.6764	-2.79929	27.7291	9.99301	b3844, b2539, b0010, b4115, b3927, b1380	ACt2rpp, ARGAGMt7pp, CINNDO, FADRx, FE3Ri, FLVRx, GLYALDtpp, GLYtpp, LDH_D, PPPNDO, UREAtpp
649	-58.9846	EX_succ_e	7.97599	-7.5	0.157559	6	34.9228	-10.6764	-2.79929	27.7291	9.99301	b3844, b4117, b0010, b2492, b3927, b1380	ACt2rpp, ARGDC, FADRx, FE3Ri, FLVRx, GLYALDtpp, GLYtpp, LDH_D, UREAtpp
650	-58.9846	EX_succ_e	7.97599	-7.5	0.157559	6	34.9228	-10.6764	-2.79929	27.7291	9.99301	b3844, b0651, b4117, b0010, b3927, b1380	ACt2rpp, ARGDC, FADRx, FE3Ri, FLVRx, GLYALDtpp, GLYtpp, LDH_D, UREAtpp
651	-58.9846	EX_succ_e	7.97599	-7.5	0.157559	6	34.9228	-10.6764	-2.79929	27.7291	9.99301	b3844, b4117, b0010, b0366, b3927, b1380	ACt2rpp, ARGDC, FADRx, FE3Ri, FLVRx, GLYALDtpp, GLYtpp, LDH_D, TAURabcpp, UREAtpp
652	-58.9846	EX_succ_e	7.97599	-7.5	0.157559	6	34.9228	-10.6764	-2.79929	27.7291	9.99301	b3844, b0010, b4115, b3927, b1380, b0784	ACt2rpp, ARGAGMt7pp, FADRx, FE3Ri, FLVRx, GLYALDtpp, GLYtpp, LDH_D, MOADSUx, MPTS, UREAtpp
653	-58.9846	EX_succ_e	7.97599	-7.5	0.157559	6	34.9228	-10.6764	-2.79929	27.7291	9.99301	b3844, b4117, b0010, b4064, b3927, b1380	ACt2rpp, ARGDC, FADRx, FE3Ri, FLVRx, GLYALDtpp, GLYtpp, LDH_D, UREAtpp
654	-58.9846	EX_succ_e	7.97599	-7.5	0.157559	6	34.9228	-10.6764	-2.79929	27.7291	9.99301	b3844, b0010, b4115, b3001, b3927, b1380	ACt2rpp, ARGAGMt7pp, FADRx, FE3Ri, FLVRx, GLYALDtpp, GLYtpp, LDH_D, UREAtpp
655	-58.9846	EX_succ_e	7.97599	-7.5	0.157559	6	34.9228	-10.6764	-2.79929	27.7291	9.99301	b3844, b0010, b4115, b1002, b3927, b1380	ACt2rpp, ARGAGMt7pp, FADRx, FE3Ri, FLVRx, GAL1PPpp, GLYALDtpp, GLYtpp, LDH_D, UREAtpp
656	-58.9846	EX_succ_e	7.97599	-7.5	0.157559	6	34.9228	-10.6764	-2.79929	27.7291	9.99301	b3844, b0010, b4115, b3927, b1380, b0783	ACt2rpp, ARGAGMt7pp, CPMPS, FADRx, FE3Ri, FLVRx, GLYALDtpp, GLYtpp, LDH_D, UREAtpp
657	-58.9846	EX_succ_e	7.97599	-7.5	0.157559	6	34.9228	-10.6764	-2.79929	27.7291	9.99301	b3844, b4117, b1584, b0010, b3927, b1380	ACt2rpp, ARGDC, FADRx, FE3Ri, FLVRx, GLYALDtpp, GLYtpp, LDH_D, SPMDAT1, SPMDAT2, UREAtpp
658	-58.9846	EX_succ_e	7.97599	-7.5	0.157559	6	34.9228	-10.6764	-2.79929	27.7291	9.99301	b3844, b0010, b4115, b3927, b1380, b0314	ACt2rpp, ARGAGMt7pp, FADRx, FE3Ri, FLVRx, GLYALDtpp, GLYtpp, LDH_D, UREAtpp
659	-58.9846	EX_succ_e	7.97599	-7.5	0.157559	6	34.9228	-10.6764	-2.79929	27.7291	9.99301	b3844, b0010, b4115, b3927, b2303, b1380	ACt2rpp, ARGAGMt7pp, DHPTPE, FADRx, FE3Ri, FLVRx, GLYALDtpp, GLYtpp, LDH_D, UREAtpp
660	-58.9846	EX_succ_e	7.97599	-7.5	0.157559	6	34.9228	-10.6764	-2.79929	27.7291	9.99301	b3844, b0010, b0860, b4115, b3927, b1380	ACt2rpp, ARGAGMt7pp, FADRx, FE3Ri, FLVRx, GLYALDtpp, GLYtpp, LDH_D, UREAtpp
661	-58.9846	EX_succ_e	7.97599	-7.5	0.157559	6	34.9228	-10.6764	-2.79929	27.7291	9.99301	b3844, b0010, b4115, b3927, b1380, b1617	ACt2rpp, ARGAGMt7pp, FADRx, FE3Ri, FLVRx, GLYALDtpp, GLYtpp, LDH_D, METGLCUR, UREAtpp
662	-58.9846	EX_succ_e	7.97599	-7.5	0.157559	6	34.9228	-10.6764	-2.79929	27.7291	9.99301	b3844, b4117, b0010, b1059, b3927, b1380	ACt2rpp, ARGDC, FADRx, FE3Ri, FLVRx, GLYALDtpp, GLYtpp, LDH_D, MTRPOX, SARCOX, UREAtpp
663	-58.9846	EX_succ_e	7.97599	-7.5	0.157559	6	34.9228	-10.6764	-2.79929	27.7291	9.99301	b3844, b0010, b4115, b3927, b1380, b1476	ACt2rpp, ARGAGMt7pp, FADRx, FE3Ri, FLVRx, GLYALDtpp, GLYtpp, LDH_D, UREAtpp
664	-58.9846	EX_succ_e	7.97599	-7.5	0.157559	6	34.9228	-10.6764	-2.79929	27.7291	9.99301	b3844, b2168, b0010, b4115, b3927, b1380	ACt2rpp, ARGAGMt7pp, FADRx, FE3Ri, FLVRx, FRUK, GLYALDtpp, GLYtpp, LDH_D, UREAtpp
665	-58.9846	EX_succ_e	7.97599	-7.5	0.157559	6	34.9228	-10.6764	-2.79929	27.7291	9.99301	b3844, b2361, b0010, b4115, b3927, b1380	ACt2rpp, ARGAGMt7pp, FADRx, FE3Ri, FLVRx, GLYALDtpp, GLYtpp, LDH_D, UREAtpp
666	-58.9846	EX_succ_e	7.97599	-7.5	0.157559	6	34.9228	-10.6764	-2.79929	27.7291	9.99301	b3844, b4117, b0010, b3927, b1380, b2843	ACt2rpp, ARGDC, FADRx, FE3Ri, FLVRx, GLYALDtpp, GLYtpp, KDUI, LDH_D, UREAtpp
667	-58.9846	EX_succ_e	7.97599	-7.5	0.157559	6	34.9228	-10.6764	-2.79929	27.7291	9.99301	b3844, b4117, b0010, b3927, b1380, b0269	ACt2rpp, ARGDC, FADRx, FE3Ri, FLVRx, GLYALDtpp, GLYtpp, LDH_D, UREAtpp
668	-58.9846	EX_succ_e	7.97599	-7.5	0.157559	6	34.9228	-10.6764	-2.79929	27.7291	9.99301	b3844, b4117, b0010, b1764, b3927, b1380	ACt2rpp, ARGDC, FADRx, FE3Ri, FLVRx, GLYALDtpp, GLYtpp, LDH_D, SELNPS, UREAtpp
669	-58.9846	EX_succ_e	7.97599	-7.5	0.157559	6	34.9228	-10.6764	-2.79929	27.7291	9.99301	b3844, b1225, b0010, b4115, b3927, b1380	ACt2rpp, ARGAGMt7pp, FADRx, FE3Ri, FLVRx, GLYALDtpp, GLYtpp, LDH_D, UREAtpp
670	-58.9846	EX_succ_e	7.97599	-7.5	0.157559	6	34.9228	-10.6764	-2.79929	27.7291	9.99301	b3844, b4117, b0010, b0306, b3927, b1380	ACt2rpp, ARGDC, FADRx, FE3Ri, FLVRx, GLYALDtpp, GLYtpp, LDH_D, UREAtpp
671	-58.9846	EX_succ_e	7.97599	-7.5	0.157559	6	34.9228	-10.6764	-2.79929	27.7291	9.99301	b3844, b0010, b4115, b1919, b3927, b1380	ACt2rpp, ARGAGMt7pp, CYSDDS, FADRx, FE3Ri, FLVRx, GLYALDtpp, GLYtpp, LDH_D, UREAtpp
672	-58.9846	EX_succ_e	7.97599	-7.5	0.157559	6	34.9228	-10.6764	-2.79929	27.7291	9.99301	b3844, b0010, b2429, b4115, b3927, b1380	ACMUMptspp, ACt2rpp, ARGAGMt7pp, FADRx, FE3Ri, FLVRx, GLYALDtpp, GLYtpp, LDH_D, SUCptspp, UREAtpp
673	-58.9846	EX_succ_e	7.97599	-7.5	0.157559	6	34.9228	-10.6764	-2.79929	27.7291	9.99301	b3844, b0010, b4115, b3927, b1380, b4098	ACt2rpp, ARGAGMt7pp, CPL, FADRx, FE3Ri, FLVRx, GLYALDtpp, GLYtpp, LDH_D, UREAtpp
674	-58.9846	EX_succ_e	7.97599	-7.5	0.157559	6	34.9228	-10.6764	-2.79929	27.7291	9.99301	b3844, b3713, b0010, b4115, b3927, b1380	ACt2rpp, ARGAGMt7pp, FADRx, FE3Ri, FLVRx, GLYALDtpp, GLYtpp, LDH_D, UREAtpp
675	-58.9846	EX_succ_e	7.97599	-7.5	0.157559	6	34.9228	-10.6764	-2.79929	27.7291	9.99301	b3844, b4117, b0010, b0573, b3927, b1380	ACt2rpp, AGt3, ARGDC, CUt3, FADRx, FE3Ri, FLVRx, GLYALDtpp, GLYtpp, LDH_D, UREAtpp
676	-58.9846	EX_succ_e	7.97599	-7.5	0.157559	6	34.9228	-10.6764	-2.79929	27.7291	9.99301	b3697, b3844, b0010, b4115, b3927, b1380	ACt2rpp, ARGAGMt7pp, FADRx, FE3Ri, FLVRx, GLYALDtpp, GLYtpp, LDH_D, UREAtpp
677	-58.9846	EX_succ_e	7.97599	-7.5	0.157559	6	34.9228	-10.6764	-2.79929	27.7291	9.99301	b3844, b4117, b0010, b3927, b1380, b3882	3SLAR, ACt2rpp, ARGDC, FADRx, FE3Ri, FLVRx, GHBDHx, GLYALDtpp, GLYtpp, LDH_D, UREAtpp
678	-58.9846	EX_succ_e	7.97599	-7.5	0.157559	6	34.9228	-10.6764	-2.79929	27.7291	9.99301	b3844, b0010, b4115, b3907, b3927, b1380	ACt2rpp, ARGAGMt7pp, FADRx, FE3Ri, FLVRx, GLYALDtpp, GLYtpp, LDH_D, LYXt2pp, RMNtpp, UREAtpp
679	-58.9846	EX_succ_e	7.97599	-7.5	0.157559	6	34.9228	-10.6764	-2.79929	27.7291	9.99301	b3844, b4117, b0010, b2169, b3927, b1380	ACt2rpp, ARGDC, FADRx, FE3Ri, FLVRx, FRUptspp, GLYALDtpp, GLYtpp, LDH_D, UREAtpp
680	-58.9846	EX_succ_e	7.97599	-7.5	0.157559	6	34.9228	-10.6764	-2.79929	27.7291	9.99301	b1190, b3844, b0010, b4115, b3927, b1380	ACt2rpp, ARGAGMt7pp, FADRx, FE3Ri, FLVRx, GLYALDtpp, GLYtpp, LDH_D, UREAtpp
681	-58.9846	EX_succ_e	7.97599	-7.5	0.157559	6	34.9228	-10.6764	-2.79929	27.7291	9.99301	b3844, b0010, b4115, b4230, b3927, b1380	ACt2rpp, ARGAGMt7pp, FADRx, FE3Ri, FLVRx, GLYALDtpp, GLYtpp, LDH_D, UREAtpp
682	-58.9846	EX_succ_e	7.97599	-7.5	0.157559	6	34.9228	-10.6764	-2.79929	27.7291	9.99301	b0008, b3844, b4117, b0010, b3927, b1380	ACt2rpp, ARGDC, FADRx, FE3Ri, FLVRx, GLYALDtpp, GLYtpp, LDH_D, UREAtpp
683	-58.9846	EX_succ_e	7.97599	-7.5	0.157559	6	34.9228	-10.6764	-2.79929	27.7291	9.99301	b3844, b0010, b4115, b3927, b1380, b3488	ACt2rpp, ARGAGMt7pp, FADRx, FE3Ri, FLVRx, GLYALDtpp, GLYtpp, INOSTO, LDH_D, UREAtpp
684	-58.9846	EX_succ_e	7.97599	-7.5	0.157559	6	34.9228	-10.6764	-2.79929	27.7291	9.99301	b0844, b3844, b4117, b0010, b3927, b1380	ACt2rpp, ARGDC, FADRx, FE3Ri, FLVRx, GLYALDtpp, GLYtpp, LDH_D, UREAtpp
685	-58.9846	EX_succ_e	7.97599	-7.5	0.157559	6	34.9228	-10.6764	-2.79929	27.7291	9.99301	b3844, b2787, b0010, b4115, b3927, b1380	ACt2rpp, ARGAGMt7pp, FADRx, FE3Ri, FLVRx, GLYALDtpp, GLYtpp, LDH_D, UREAtpp
686	-58.9846	EX_succ_e	7.97599	-7.5	0.157559	6	34.9228	-10.6764	-2.79929	27.7291	9.99301	b3844, b0010, b3747, b4115, b3927, b1380	ACt2rpp, ARGAGMt7pp, FADRx, FE3Ri, FLVRx, GLYALDtpp, GLYtpp, LDH_D, UREAtpp
687	-58.9846	EX_succ_e	7.97599	-7.5	0.157559	6	34.9228	-10.6764	-2.79929	27.7291	9.99301	b3844, b4117, b0010, b3927, b1380, b1485	ACt2rpp, ARGDC, FADRx, FE3Ri, FLVRx, GLYALDtpp, GLYtpp, LDH_D, UREAtpp
688	-58.9846	EX_succ_e	7.97599	-7.5	0.157559	6	34.9228	-10.6764	-2.79929	27.7291	9.99301	b3844, b4117, b0010, b3927, b1380, b1990	ACt2rpp, ARGDC, FADRx, FE3Ri, FLVRx, GLYALDtpp, GLYtpp, LDH_D, UREAtpp
689	-58.9846	EX_succ_e	7.97599	-7.5	0.157559	6	34.9228	-10.6764	-2.79929	27.7291	9.99301	b3844, b4117, b0010, b3927, b1380, b0632	ACt2rpp, ARGDC, FADRx, FE3Ri, FLVRx, GLYALDtpp, GLYtpp, LDH_D, UREAtpp
690	-58.9846	EX_succ_e	7.97599	-7.5	0.157559	6	34.9228	-10.6764	-2.79929	27.7291	9.99301	b3844, b0010, b4115, b3927, b1380, b1619	ACt2rpp, ARGAGMt7pp, CHOLID, FADRx, FE3Ri, FLVRx, GLYALDtpp, GLYtpp, LDH_D, UREAtpp
691	-58.9846	EX_succ_e	7.97599	-7.5	0.157559	6	34.9228	-10.6764	-2.79929	27.7291	9.99301	b3844, b0010, b4115, b0260, b3927, b1380	ACt2rpp, ARGAGMt7pp, FADRx, FE3Ri, FLVRx, GLYALDtpp, GLYtpp, LDH_D, MMETt2pp, UREAtpp
692	-58.9846	EX_succ_e	7.97599	-7.5	0.157559	6	34.9228	-10.6764	-2.79929	27.7291	9.99301	b3844, b0010, b4115, b3374, b3927, b1380	ACt2rpp, ARGAGMt7pp, FADRx, FE3Ri, FLVRx, FRULYSK, GLYALDtpp, GLYtpp, LDH_D, UREAtpp
693	-58.9846	EX_succ_e	7.97599	-7.5	0.157559	6	34.9228	-10.6764	-2.79929	27.7291	9.99301	b3844, b0010, b4115, b3927, b3503, b1380	ACt2rpp, ARGAGMt7pp, ASR, FADRx, FE3Ri, FLVRx, GLYALDtpp, GLYtpp, LDH_D, UREAtpp
694	-58.9846	EX_succ_e	7.97599	-7.5	0.157559	6	34.9228	-10.6764	-2.79929	27.7291	9.99301	b3885, b3844, b4117, b0010, b3927, b1380	ACt2rpp, ARGDC, FADRx, FE3Ri, FLVRx, GLYALDtpp, GLYtpp, LDH_D, UREAtpp
695	-58.9846	EX_succ_e	7.97599	-7.5	0.157559	6	34.9228	-10.6764	-2.79929	27.7291	9.99301	b3844, b0010, b4115, b3927, b0070, b1380	ACt2rpp, ARGAGMt7pp, FADRx, FE3Ri, FLVRx, GLYALDtpp, GLYtpp, LDH_D, UREAtpp
696	-58.9846	EX_succ_e	7.97599	-7.5	0.157559	6	34.9228	-10.6764	-2.79929	27.7291	9.99301	b3844, b2431, b4117, b0010, b3927, b1380	ACt2rpp, ARGDC, FADRx, FE3Ri, FLVRx, GLYALDtpp, GLYtpp, LDH_D, UREAtpp
697	-58.9846	EX_succ_e	7.97599	-7.5	0.157559	6	34.9228	-10.6764	-2.79929	27.7291	9.99301	b3844, b4117, b4374, b0010, b3927, b1380	ACt2rpp, ARGDC, FADRx, FE3Ri, FLVRx, GLYALDtpp, GLYtpp, LDH_D, UREAtpp
698	-58.9846	EX_succ_e	7.97599	-7.5	0.157559	6	34.9228	-10.6764	-2.79929	27.7291	9.99301	b3844, b4117, b3248, b0010, b3927, b1380	ACt2rpp, ARGDC, FADRx, FE3Ri, FLVRx, GLYALDtpp, GLYtpp, LDH_D, UREAtpp
699	-58.9846	EX_succ_e	7.97599	-7.5	0.157559	6	34.9228	-10.6764	-2.79929	27.7291	9.99301	b3844, b2215, b0010, b4115, b3927, b1380	ACt2rpp, ARGAGMt7pp, FADRx, FE3Ri, FLVRx, GLYALDtpp, GLYtpp, LDH_D, UREAtpp
700	-58.9846	EX_succ_e	7.97599	-7.5	0.157559	6	34.9228	-10.6764	-2.79929	27.7291	9.99301	b3844, b0010, b4115, b2483, b3927, b1380	ACt2rpp, ARGAGMt7pp, FADRx, FE3Ri, FLVRx, GLYALDtpp, GLYtpp, LDH_D, UREAtpp
701	-58.9846	EX_succ_e	7.97599	-7.5	0.157559	6	34.9228	-10.6764	-2.79929	27.7291	9.99301	b3844, b0010, b4115, b2253, b3927, b1380	ACt2rpp, ARGAGMt7pp, FADRx, FE3Ri, FLVRx, GLYALDtpp, GLYtpp, LDH_D, UDPKAAT, UREAtpp
702	-58.9846	EX_succ_e	7.97599	-7.5	0.157559	6	34.9228	-10.6764	-2.79929	27.7291	9.99301	b3844, b0010, b4115, b3927, b1380, b2430	ACt2rpp, ARGAGMt7pp, FADRx, FE3Ri, FLVRx, GLYALDtpp, GLYtpp, LDH_D, UREAtpp
703	-58.9846	EX_succ_e	7.97599	-7.5	0.157559	6	34.9228	-10.6764	-2.79929	27.7291	9.99301	b3844, b0010, b4115, b3927, b1380, b0693	ACt2rpp, ARGAGMt7pp, FADRx, FE3Ri, FLVRx, GLYALDtpp, GLYtpp, LDH_D, UREAtpp
704	-58.9846	EX_succ_e	7.97599	-7.5	0.157559	6	34.9228	-10.6764	-2.79929	27.7291	9.99301	b3844, b0825, b0010, b4115, b3927, b1380	ACt2rpp, ARGAGMt7pp, FADRx, FE3Ri, FLVRx, GLYALDtpp, GLYtpp, LDH_D, UREAtpp
705	-58.9846	EX_succ_e	7.97599	-7.5	0.157559	6	34.9228	-10.6764	-2.79929	27.7291	9.99301	b3844, b1814, b0010, b4115, b3927, b1380	ACt2rpp, ARGAGMt7pp, FADRx, FE3Ri, FLVRx, GLYALDtpp, GLYtpp, LDH_D, UREAtpp
706	-58.9846	EX_succ_e	7.97599	-7.5	0.157559	6	34.9228	-10.6764	-2.79929	27.7291	9.99301	b3844, b4117, b0010, b3927, b1380, b0009	ACt2rpp, ARGDC, FADRx, FE3Ri, FLVRx, GLYALDtpp, GLYtpp, LDH_D, MPTAT, UREAtpp
707	-58.9846	EX_succ_e	7.97599	-7.5	0.157559	6	34.9228	-10.6764	-2.79929	27.7291	9.99301	b3844, b0010, b4115, b3927, b1380, b1193	ACt2rpp, ARGAGMt7pp, FADRx, FE3Ri, FLVRx, GLYALDtpp, GLYtpp, LDH_D, UREAtpp
708	-58.9846	EX_succ_e	7.97599	-7.5	0.157559	6	34.9228	-10.6764	-2.79929	27.7291	9.99301	b3844, b4117, b0010, b4131, b3927, b1380	ACt2rpp, ARGDC, FADRx, FE3Ri, FLVRx, GLYALDtpp, GLYtpp, LDH_D, UREAtpp
709	-58.9846	EX_succ_e	7.97599	-7.5	0.157559	6	34.9228	-10.6764	-2.79929	27.7291	9.99301	b3844, b4117, b0010, b3927, b1380, b2683	ACt2rpp, ARGDC, FADRx, FE3Ri, FLVRx, GLYALDtpp, GLYtpp, LDH_D, UREAtpp
710	-58.9846	EX_succ_e	7.97599	-7.5	0.157559	6	34.9228	-10.6764	-2.79929	27.7291	9.99301	b3844, b4117, b0207, b0010, b3927, b1380	ACt2rpp, ARGDC, FADRx, FE3Ri, FLVRx, GLYALDtpp, GLYtpp, LDH_D, UREAtpp
711	-58.9846	EX_succ_e	7.97599	-7.5	0.157559	6	34.9228	-10.6764	-2.79929	27.7291	9.99301	b3844, b4117, b0010, b3927, b1380, b2924	ACt2rpp, ARGDC, FADRx, FE3Ri, FLVRx, GLYALDtpp, GLYtpp, LDH_D, UREAtpp
712	-58.9846	EX_succ_e	7.97599	-7.5	0.157559	6	34.9228	-10.6764	-2.79929	27.7291	9.99301	b3844, b0010, b4115, b3927, b1380, b4337	ACt2rpp, ARGAGMt7pp, CHOLATEtpp, FADRx, FE3Ri, FLVRx, GLYALDtpp, GLYtpp, LDH_D, UREAtpp
713	-58.9846	EX_succ_e	7.97599	-7.5	0.157559	6	34.9228	-10.6764	-2.79929	27.7291	9.99301	b3844, b4117, b0010, b0679, b3927, b1380	ACt2rpp, ARGDC, FADRx, FE3Ri, FLVRx, GLYALDtpp, GLYtpp, LDH_D, UREAtpp
714	-58.9846	EX_succ_e	7.97599	-7.5	0.157559	6	34.9228	-10.6764	-2.79929	27.7291	9.99301	b3844, b0010, b4115, b3927, b1380, b0808	ACt2rpp, ARGAGMt7pp, FADRx, FE3Ri, FLVRx, GLYALDtpp, GLYtpp, LDH_D, UREAtpp
715	-58.9846	EX_succ_e	7.97599	-7.5	0.157559	6	34.9228	-10.6764	-2.79929	27.7291	9.99301	b3844, b4117, b0010, b3579, b3927, b1380	23DOGULNt4pp, ACt2rpp, ARGDC, FADRx, FE3Ri, FLVRx, GLYALDtpp, GLYtpp, LDH_D, UREAtpp, XYLUt2pp
716	-58.9846	EX_succ_e	7.97599	-7.5	0.157559	6	34.9228	-10.6764	-2.79929	27.7291	9.99301	b3844, b3012, b0010, b4115, b3927, b1380	ACt2rpp, ARGAGMt7pp, FADRx, FE3Ri, FLVRx, GLYALDtpp, GLYtpp, LDH_D, UREAtpp
717	-58.9846	EX_succ_e	7.97599	-7.5	0.157559	6	34.9228	-10.6764	-2.79929	27.7291	9.99301	b3844, b4117, b0010, b3927, b1380, b0781	ACt2rpp, ARGDC, CPMPS, FADRx, FE3Ri, FLVRx, GLYALDtpp, GLYtpp, LDH_D, UREAtpp
718	-58.9846	EX_succ_e	7.97599	-7.5	0.157559	6	34.9228	-10.6764	-2.79929	27.7291	9.99301	b3844, b0010, b4115, b3927, b1380, b2924	ACt2rpp, ARGAGMt7pp, FADRx, FE3Ri, FLVRx, GLYALDtpp, GLYtpp, LDH_D, UREAtpp
719	-58.9846	EX_succ_e	7.97599	-7.5	0.157559	6	34.9228	-10.6764	-2.79929	27.7291	9.99301	b3844, b4117, b2661, b0010, b3927, b1380	ACt2rpp, ARGDC, FADRx, FE3Ri, FLVRx, GLYALDtpp, GLYtpp, LDH_D, UREAtpp
720	-58.9846	EX_succ_e	7.97599	-7.5	0.157559	6	34.9228	-10.6764	-2.79929	27.7291	9.99301	b3844, b4117, b0010, b3927, b1380, b0805	ACt2rpp, ARGDC, FADRx, FE3Ri, FLVRx, GLYALDtpp, GLYtpp, LDH_D, UREAtpp
721	-58.9846	EX_succ_e	7.97599	-7.5	0.157559	6	34.9228	-10.6764	-2.79929	27.7291	9.99301	b3844, b4117, b0010, b0854, b3927, b1380	ACt2rpp, ARGDC, FADRx, FE3Ri, FLVRx, GLYALDtpp, GLYtpp, LDH_D, UREAtpp
722	-58.9846	EX_succ_e	7.97599	-7.5	0.157559	6	34.9228	-10.6764	-2.79929	27.7291	9.99301	b3844, b4117, b0010, b0186, b3927, b1380	ACt2rpp, ARGDC, FADRx, FE3Ri, FLVRx, GLYALDtpp, GLYtpp, LDH_D, UREAtpp
723	-58.9846	EX_succ_e	7.97599	-7.5	0.157559	6	34.9228	-10.6764	-2.79929	27.7291	9.99301	b3844, b4117, b0010, b0972, b3927, b1380	ACt2rpp, ARGDC, FADRx, FE3Ri, FLVRx, GLYALDtpp, GLYtpp, LDH_D, UREAtpp
724	-58.9846	EX_succ_e	7.97599	-7.5	0.157559	6	34.9228	-10.6764	-2.79929	27.7291	9.99301	b3844, b4117, b0010, b1223, b3927, b1380	ACt2rpp, ARGDC, FADRx, FE3Ri, FLVRx, GLYALDtpp, GLYtpp, LDH_D, UREAtpp
725	-58.9846	EX_succ_e	7.97599	-7.5	0.157559	6	34.9228	-10.6764	-2.79929	27.7291	9.99301	b3844, b0010, b4115, b3927, b1380, b3496	ACt2rpp, ARGAGMt7pp, FADRx, FE3Ri, FLVRx, GLYALDtpp, GLYtpp, LDH_D, UREAtpp
726	-58.9846	EX_succ_e	7.97599	-7.5	0.157559	6	34.9228	-10.6764	-2.79929	27.7291	9.99301	b3844, b4117, b0010, b0765, b3927, b1380	ACt2rpp, ARGDC, FADRx, FE3Ri, FLVRx, GLYALDtpp, GLYtpp, LDH_D, TUNGSabcpp, UREAtpp
727	-58.9846	EX_succ_e	7.97599	-7.5	0.157559	6	34.9228	-10.6764	-2.79929	27.7291	9.99301	b3844, b4117, b0010, b3927, b2147, b1380	ACt2rpp, ARGDC, DURADx, FADRx, FE3Ri, FLVRx, GLYALDtpp, GLYtpp, LDH_D, UREAtpp
728	-58.9846	EX_succ_e	7.97599	-7.5	0.157559	6	34.9228	-10.6764	-2.79929	27.7291	9.99301	b1589, b3844, b4117, b0010, b3927, b1380	ACt2rpp, ARGDC, FADRx, FE3Ri, FLVRx, GLYALDtpp, GLYtpp, LDH_D, SELR, UREAtpp
729	-58.9846	EX_succ_e	7.97599	-7.5	0.157559	6	34.9228	-10.6764	-2.79929	27.7291	9.99301	b3844, b4117, b0010, b4090, b3927, b1380	ACt2rpp, ALLPI, ARGDC, FADRx, FE3Ri, FLVRx, GLYALDtpp, GLYtpp, LDH_D, UREAtpp
730	-58.9846	EX_succ_e	7.97599	-7.5	0.157559	6	34.9228	-10.6764	-2.79929	27.7291	9.99301	b3844, b4117, b0010, b3927, b1380, b1008	ACt2rpp, ARGDC, FADRx, FE3Ri, FLVRx, GLYALDtpp, GLYtpp, LDH_D, UREAtpp
731	-58.9846	EX_succ_e	7.97599	-7.5	0.157559	6	34.9228	-10.6764	-2.79929	27.7291	9.99301	b3844, b0010, b4115, b3927, b1380, b3877	ACt2rpp, ARGAGMt7pp, DHPStr, FADRx, FE3Ri, FLVRx, GLYALDtpp, GLYtpp, LDH_D, UREAtpp
732	-58.9846	EX_succ_e	7.97599	-7.5	0.157559	6	34.9228	-10.6764	-2.79929	27.7291	9.99301	b3844, b4014, b0010, b4115, b3927, b1380	ACt2rpp, ARGAGMt7pp, FADRx, FE3Ri, FLVRx, GLYALDtpp, GLYtpp, LDH_D, UREAtpp
733	-58.9846	EX_succ_e	7.97599	-7.5	0.157559	6	34.9228	-10.6764	-2.79929	27.7291	9.99301	b3844, b4117, b0010, b1991, b3927, b1380	ACt2rpp, ARGDC, FADRx, FE3Ri, FLVRx, GLYALDtpp, GLYtpp, LDH_D, NNDMBRT, UREAtpp
734	-58.9846	EX_succ_e	7.97599	-7.5	0.157559	6	34.9228	-10.6764	-2.79929	27.7291	9.99301	b3844, b0273, b0010, b4115, b3927, b1380	ACt2rpp, ARGAGMt7pp, FADRx, FE3Ri, FLVRx, GLYALDtpp, GLYtpp, LDH_D, UREAtpp
735	-58.9846	EX_succ_e	7.97599	-7.5	0.157559	6	34.9228	-10.6764	-2.79929	27.7291	9.99301	b3844, b4117, b0010, b3927, b1380, b2965	ACt2rpp, ARGDC, FADRx, FE3Ri, FLVRx, GLYALDtpp, GLYtpp, LDH_D, UREAtpp
736	-58.9846	EX_succ_e	7.97599	-7.5	0.157559	6	34.9228	-10.6764	-2.79929	27.7291	9.99301	b3844, b4117, b0010, b1197, b3927, b1380	ACt2rpp, ARGDC, FADRx, FE3Ri, FLVRx, GLYALDtpp, GLYtpp, LDH_D, TREHpp, UREAtpp
737	-58.9846	EX_succ_e	7.97599	-7.5	0.157559	6	34.9228	-10.6764	-2.79929	27.7291	9.99301	b2708, b3844, b4117, b0010, b3927, b1380	ACt2rpp, ARGDC, FADRx, FE3Ri, FLVRx, GLYALDtpp, GLYtpp, LDH_D, UREAtpp
738	-58.9846	EX_succ_e	7.97599	-7.5	0.157559	6	34.9228	-10.6764	-2.79929	27.7291	9.99301	b3844, b0335, b0010, b4115, b3927, b1380	ACt2rpp, ARGAGMt7pp, FADRx, FE3Ri, FLVRx, GLYALDtpp, GLYtpp, LDH_D, UREAtpp
739	-58.9846	EX_succ_e	7.97599	-7.5	0.157559	6	34.9228	-10.6764	-2.79929	27.7291	9.99301	b3844, b4117, b2205, b0010, b3927, b1380	ACt2rpp, ARGDC, FADRx, FE3Ri, FLVRx, GLYALDtpp, GLYtpp, LDH_D, NO3R1bpp, UREAtpp
740	-58.9846	EX_succ_e	7.97599	-7.5	0.157559	6	34.9228	-10.6764	-2.79929	27.7291	9.99301	b3844, b0010, b4115, b3927, b1380, b2092	ACt2rpp, ARGAGMt7pp, FADRx, FE3Ri, FLVRx, GALTptspp, GLYALDtpp, GLYtpp, LDH_D, UREAtpp
741	-58.9846	EX_succ_e	7.97599	-7.5	0.157559	6	34.9228	-10.6764	-2.79929	27.7291	9.99301	b3844, b0010, b4115, b2484, b3927, b1380	ACt2rpp, ARGAGMt7pp, FADRx, FE3Ri, FLVRx, GLYALDtpp, GLYtpp, LDH_D, UREAtpp
742	-58.9846	EX_succ_e	7.97599	-7.5	0.157559	6	34.9228	-10.6764	-2.79929	27.7291	9.99301	b3844, b0010, b4115, b0307, b3927, b1380	ACt2rpp, ARGAGMt7pp, FADRx, FE3Ri, FLVRx, GLYALDtpp, GLYtpp, LDH_D, UREAtpp
743	-58.9846	EX_succ_e	7.97599	-7.5	0.157559	6	34.9228	-10.6764	-2.79929	27.7291	9.99301	b3844, b2095, b0010, b4115, b3927, b1380	ACt2rpp, ARGAGMt7pp, FADRx, FE3Ri, FLVRx, GLYALDtpp, GLYtpp, LDH_D, UREAtpp
744	-58.9846	EX_succ_e	7.97599	-7.5	0.157559	6	34.9228	-10.6764	-2.79929	27.7291	9.99301	b3844, b4117, b0010, b3927, b1380, b2166	ACt2rpp, ARGDC, FADRx, FE3Ri, FLVRx, GLYALDtpp, GLYtpp, LDH_D, PSURIK, UREAtpp
745	-58.9846	EX_succ_e	7.97599	-7.5	0.157559	6	34.9228	-10.6764	-2.79929	27.7291	9.99301	b3844, b0010, b4115, b0381, b3927, b1380	ACt2rpp, ARGAGMt7pp, FADRx, FE3Ri, FLVRx, GLYALDtpp, GLYtpp, LDH_D, UREAtpp
746	-58.9846	EX_succ_e	7.97599	-7.5	0.157559	6	34.9228	-10.6764	-2.79929	27.7291	9.99301	b3844, b3600, b0010, b4115, b3927, b1380	ACt2rpp, ARGAGMt7pp, FADRx, FE3Ri, FLVRx, GLYALDtpp, GLYtpp, LDH_D, M1PD, UREAtpp
747	-58.9846	EX_succ_e	7.97599	-7.5	0.157559	6	34.9228	-10.6764	-2.79929	27.7291	9.99301	b3844, b4117, b0010, b3927, b1380, b0211	ACt2rpp, ARGDC, FADRx, FE3Ri, FLVRx, GLYALDtpp, GLYtpp, LDH_D, UREAtpp
748	-58.9846	EX_succ_e	7.97599	-7.5	0.157559	6	34.9228	-10.6764	-2.79929	27.7291	9.99301	b3844, b4117, b0010, b3927, b1380, b3893	ACt2rpp, ARGDC, FADRx, FE3Ri, FLVRx, GLYALDtpp, GLYtpp, LDH_D, UREAtpp
749	-58.9846	EX_succ_e	7.97599	-7.5	0.157559	6	34.9228	-10.6764	-2.79929	27.7291	9.99301	b3844, b0010, b4115, b3502, b3927, b1380	ACt2rpp, ARGAGMt7pp, ASO3t8pp, FADRx, FE3Ri, FLVRx, GLYALDtpp, GLYtpp, LDH_D, UREAtpp
750	-58.9846	EX_succ_e	7.97599	-7.5	0.157559	6	34.9228	-10.6764	-2.79929	27.7291	9.99301	b3844, b4117, b0010, b3502, b3927, b1380	ACt2rpp, ARGDC, ASO3t8pp, FADRx, FE3Ri, FLVRx, GLYALDtpp, GLYtpp, LDH_D, UREAtpp
751	-58.9846	EX_succ_e	7.97599	-7.5	0.157559	6	34.9228	-10.6764	-2.79929	27.7291	9.99301	b3844, b0010, b4115, b0731, b3927, b1380	ACt2rpp, ARGAGMt7pp, FADRx, FE3Ri, FLVRx, GLYALDtpp, GLYtpp, LDH_D, MANGLYCptspp, UREAtpp
752	-58.9846	EX_succ_e	7.97599	-7.5	0.157559	6	34.9228	-10.6764	-2.79929	27.7291	9.99301	b1095, b3844, b0010, b4115, b3927, b1380	3OAS181, ACt2rpp, ARGAGMt7pp, FADRx, FE3Ri, FLVRx, GLYALDtpp, GLYtpp, LDH_D, UREAtpp
753	-58.9846	EX_succ_e	7.97599	-7.5	0.157559	6	34.9228	-10.6764	-2.79929	27.7291	9.99301	b3844, b0010, b4115, b4265, b3927, b1380	5DGLCNt2rpp, ACt2rpp, ARGAGMt7pp, FADRx, FE3Ri, FLVRx, GLYALDtpp, GLYtpp, IDONt2rpp, LDH_D, UREAtpp
754	-58.9846	EX_succ_e	7.97599	-7.5	0.157559	6	34.9228	-10.6764	-2.79929	27.7291	9.99301	b3844, b4117, b2440, b0010, b3927, b1380	ACt2rpp, ARGDC, ETHAAL, FADRx, FE3Ri, FLVRx, GLYALDtpp, GLYtpp, LDH_D, UREAtpp
755	-58.9846	EX_succ_e	7.97599	-7.5	0.157559	6	34.9228	-10.6764	-2.79929	27.7291	9.99301	b3844, b0010, b4115, b3927, b1380, b1601	ACt2rpp, AI2tpp, ARGAGMt7pp, FADRx, FE3Ri, FLVRx, GLYALDtpp, GLYtpp, LDH_D, UREAtpp
756	-58.9846	EX_succ_e	7.97599	-7.5	0.157559	6	34.9228	-10.6764	-2.79929	27.7291	9.99301	b3844, b4117, b0010, b3927, b1380, b1601	ACt2rpp, AI2tpp, ARGDC, FADRx, FE3Ri, FLVRx, GLYALDtpp, GLYtpp, LDH_D, UREAtpp
757	-58.9846	EX_succ_e	7.97599	-7.5	0.157559	6	34.9228	-10.6764	-2.79929	27.7291	9.99301	b3844, b4117, b0010, b3927, b1380, b1514	ACt2rpp, AI2abcpp, ARGDC, FADRx, FE3Ri, FLVRx, GLYALDtpp, GLYtpp, LDH_D, UREAtpp
758	-58.9846	EX_succ_e	7.97599	-7.5	0.157559	6	34.9228	-10.6764	-2.79929	27.7291	9.99301	b3844, b0010, b4115, b3927, b1380, b1513	ACt2rpp, AI2abcpp, ARGAGMt7pp, FADRx, FE3Ri, FLVRx, GLYALDtpp, GLYtpp, LDH_D, UREAtpp
759	-58.9846	EX_succ_e	7.97599	-7.5	0.157559	6	34.9228	-10.6764	-2.79929	27.7291	9.99301	b3844, b0010, b0151, b4115, b3927, b1380	ACt2rpp, ARBTNabcpp, ARGAGMt7pp, CPGNabcpp, FADRx, FE3HOXabcpp, FE3Ri, FECRMabcpp, FEOXAMabcpp, FLVRx, GLYALDtpp, GLYtpp, LDH_D, UREAtpp
760	-58.9846	EX_succ_e	7.97599	-7.5	0.157559	6	34.9228	-10.6764	-2.79929	27.7291	9.99301	b3844, b4117, b0010, b3927, b1528, b1380	ACt2rpp, ARBt3ipp, ARGDC, FADRx, FE3Ri, FLVRx, GLYALDtpp, GLYtpp, LDH_D, MELIBt3ipp, UREAtpp
761	-58.9846	EX_succ_e	7.97599	-7.5	0.157559	6	34.9228	-10.6764	-2.79929	27.7291	9.99301	b3844, b0010, b4115, b3927, b1380, b0007	ACt2rpp, ALAt4pp, ARGAGMt7pp, FADRx, FE3Ri, FLVRx, GLYALDtpp, GLYt4pp, GLYtpp, LDH_D, UREAtpp
762	-58.9846	EX_succ_e	7.97599	-7.5	0.157559	6	34.9228	-10.6764	-2.79929	27.7291	9.99301	b3844, b4117, b0010, b3927, b1380, b0007	ACt2rpp, ALAt4pp, ARGDC, FADRx, FE3Ri, FLVRx, GLYALDtpp, GLYt4pp, GLYtpp, LDH_D, UREAtpp
763	-58.9846	EX_succ_e	7.97599	-7.5	0.157559	6	34.9228	-10.6764	-2.79929	27.7291	9.99301	b3844, b0010, b4115, b3927, b1380, b2328	ACt2rpp, ARGAGMt7pp, FADRx, FE3Ri, FLVRx, GLYALDtpp, GLYtpp, LDH_D, MLDEP1pp, MLDEP2pp, UREAtpp
764	-58.9846	EX_succ_e	7.97599	-7.5	0.157559	6	34.9228	-10.6764	-2.79929	27.7291	9.99301	b3844, b0010, b4115, b4460, b3927, b1380	ACt2rpp, ARBabcpp, ARGAGMt7pp, FADRx, FE3Ri, FLVRx, GLYALDtpp, GLYtpp, LDH_D, UREAtpp
765	-58.9846	EX_succ_e	7.97599	-7.5	0.157559	6	34.9228	-10.6764	-2.79929	27.7291	9.99301	b3844, b4117, b0010, b1901, b3927, b1380	ACt2rpp, ARBabcpp, ARGDC, FADRx, FE3Ri, FLVRx, GLYALDtpp, GLYtpp, LDH_D, UREAtpp
766	-58.9846	EX_succ_e	7.97599	-7.5	0.157559	6	34.9228	-10.6764	-2.79929	27.7291	9.99301	b3844, b0010, b4115, b3927, b1380, b1473	ACt2rpp, ARGAGMt7pp, FADRx, FE3Ri, FLVRx, GLYALDtpp, GLYtpp, LDH_D, PHEtipp, TRPtipp, TYRtipp, UREAtpp
767	-58.9846	EX_succ_e	7.97599	-7.5	0.157559	6	34.9228	-10.6764	-2.79929	27.7291	9.99301	b3844, b4117, b0010, b3927, b1380, b1473	ACt2rpp, ARGDC, FADRx, FE3Ri, FLVRx, GLYALDtpp, GLYtpp, LDH_D, PHEtipp, TRPtipp, TYRtipp, UREAtpp
768	-58.9846	EX_succ_e	7.97599	-7.5	0.157559	6	34.9228	-10.6764	-2.79929	27.7291	9.99301	b3844, b4117, b0394, b0010, b3927, b1380	ACt2rpp, ARGDC, FADRx, FE3Ri, FLVRx, GLYALDtpp, GLYtpp, HEX7, LDH_D, UREAtpp
769	-58.9846	EX_succ_e	7.97599	-7.5	0.157559	6	34.9228	-10.6764	-2.79929	27.7291	9.99301	b3844, b4117, b4119, b0010, b3927, b1380	ACt2rpp, ARGDC, FADRx, FE3Ri, FLVRx, GALS3, GLYALDtpp, GLYtpp, LDH_D, UREAtpp
770	-58.9846	EX_succ_e	7.97599	-7.5	0.157559	6	34.9228	-10.6764	-2.79929	27.7291	9.99301	b3844, b0010, b4115, b2025, b3927, b1380	ACt2rpp, ARGAGMt7pp, FADRx, FE3Ri, FLVRx, GLYALDtpp, GLYtpp, IG3PS, LDH_D, UREAtpp
771	-58.9846	EX_succ_e	7.97599	-7.5	0.157559	6	34.9228	-10.6764	-2.79929	27.7291	9.99301	b2024, b3844, b4117, b0010, b3927, b1380	ACt2rpp, ARGDC, FADRx, FE3Ri, FLVRx, GLYALDtpp, GLYtpp, LDH_D, PRMICI, UREAtpp
772	-58.9846	EX_succ_e	7.97599	-7.5	0.157559	6	34.9228	-10.6764	-2.79929	27.7291	9.99301	b3844, b4117, b0010, b2025, b3927, b1380	ACt2rpp, ARGDC, FADRx, FE3Ri, FLVRx, GLYALDtpp, GLYtpp, IG3PS, LDH_D, UREAtpp
773	-58.9846	EX_succ_e	7.97599	-7.5	0.157559	6	34.9228	-10.6764	-2.79929	27.7291	9.99301	b3844, b2019, b0010, b4115, b3927, b1380	ACt2rpp, ARGAGMt7pp, ATPPRT, FADRx, FE3Ri, FLVRx, GLYALDtpp, GLYtpp, LDH_D, UREAtpp
774	-58.9846	EX_succ_e	7.97599	-7.5	0.157559	6	34.9228	-10.6764	-2.79929	27.7291	9.99301	b3844, b0010, b4115, b3927, b1380, b2021	ACt2rpp, ARGAGMt7pp, FADRx, FE3Ri, FLVRx, GLYALDtpp, GLYtpp, HSTPT, LDH_D, UREAtpp
775	-58.9846	EX_succ_e	7.97599	-7.5	0.157559	6	34.9228	-10.6764	-2.79929	27.7291	9.99301	b3844, b4117, b2020, b0010, b3927, b1380	ACt2rpp, ARGDC, FADRx, FE3Ri, FLVRx, GLYALDtpp, GLYtpp, HISTD, LDH_D, UREAtpp
776	-58.9846	EX_succ_e	7.97599	-7.5	0.157559	6	34.9228	-10.6764	-2.79929	27.7291	9.99301	b3844, b4117, b1623, b0010, b3927, b1380	ACt2rpp, ADA, ARGDC, DADA, FADRx, FE3Ri, FLVRx, GLYALDtpp, GLYtpp, LDH_D, UREAtpp
777	-58.9846	EX_succ_e	7.97599	-7.5	0.157559	6	34.9228	-10.6764	-2.79929	27.7291	9.99301	b0038, b3844, b0010, b4115, b3927, b1380	ACt2rpp, ARGAGMt7pp, CRNBTCT, CRNCBCT, FADRx, FE3Ri, FLVRx, GLYALDtpp, GLYtpp, LDH_D, UREAtpp
778	-58.9846	EX_succ_e	7.97599	-7.5	0.157559	6	34.9228	-10.6764	-2.79929	27.7291	9.99301	b3844, b0010, b4115, b3927, b1380, b1396	ACt2rpp, ARGAGMt7pp, FADRx, FE3Ri, FLVRx, GLYALDtpp, GLYtpp, HPACOAT, LDH_D, PACOAT, UREAtpp
779	-58.9846	EX_succ_e	7.97599	-7.5	0.157559	6	34.9228	-10.6764	-2.79929	27.7291	9.99301	b3844, b0010, b2587, b4115, b3927, b1380	ACt2rpp, AKGt2rpp, ARGAGMt7pp, FADRx, FE3Ri, FLVRx, GLYALDtpp, GLYtpp, LDH_D, UREAtpp
780	-58.9846	EX_succ_e	7.97599	-7.5	0.157559	6	34.9228	-10.6764	-2.79929	27.7291	9.99301	b3844, b4117, b0617, b0010, b3927, b1380	ACt2rpp, ARGDC, CITL, FADRx, FE3Ri, FLVRx, GLYALDtpp, GLYtpp, LDH_D, UREAtpp
781	-58.9846	EX_succ_e	7.97599	-7.5	0.157559	6	34.9228	-10.6764	-2.79929	27.7291	9.99301	b3844, b4117, b0615, b0010, b3927, b1380	ACt2rpp, ARGDC, CITL, FADRx, FE3Ri, FLVRx, GLYALDtpp, GLYtpp, LDH_D, UREAtpp
782	-58.9846	EX_succ_e	7.97599	-7.5	0.157559	6	34.9228	-10.6764	-2.79929	27.7291	9.99301	b3844, b0010, b4115, b3620, b3927, b1380	ACt2rpp, ARGAGMt7pp, FADRx, FE3Ri, FLVRx, GLYALDtpp, GLYtpp, HEPT2, LDH_D, UREAtpp
783	-58.9846	EX_succ_e	7.97599	-7.5	0.157559	6	34.9228	-10.6764	-2.79929	27.7291	9.99301	b3844, b4117, b0010, b3927, b1380, b3623	ACt2rpp, ARGDC, FADRx, FE3Ri, FLVRx, GLYALDtpp, GLYtpp, HEPT4, LDH_D, UREAtpp
784	-58.9846	EX_succ_e	7.97599	-7.5	0.157559	6	34.9228	-10.6764	-2.79929	27.7291	9.99301	b3052, b3844, b0010, b4115, b3927, b1380	ACt2rpp, ARGAGMt7pp, FADRx, FE3Ri, FLVRx, GLYALDtpp, GLYtpp, GMHEPAT, GMHEPK, LDH_D, UREAtpp
785	-58.9846	EX_succ_e	7.97599	-7.5	0.157559	6	34.9228	-10.6764	-2.79929	27.7291	9.99301	b3844, b4117, b3787, b0010, b3927, b1380	ACt2rpp, ARGDC, FADRx, FE3Ri, FLVRx, GLYALDtpp, GLYtpp, LDH_D, UACMAMO, UREAtpp
786	-58.9846	EX_succ_e	7.97599	-7.5	0.157559	6	34.9228	-10.6764	-2.79929	27.7291	9.99301	b3844, b4117, b0010, b3624, b3927, b1380	ACt2rpp, ARGDC, FADRx, FE3Ri, FLVRx, GLYALDtpp, GLYtpp, LDH_D, MOAT3C, UREAtpp
787	-58.9846	EX_succ_e	7.97599	-7.5	0.157559	6	34.9228	-10.6764	-2.79929	27.7291	9.99301	b0222, b3844, b4117, b0010, b3927, b1380	ACt2rpp, ARGDC, FADRx, FE3Ri, FLVRx, GLYALDtpp, GLYtpp, LDH_D, S7PI, UREAtpp
788	-58.9846	EX_succ_e	7.97599	-7.5	0.157559	6	34.9228	-10.6764	-2.79929	27.7291	9.99301	b2040, b3844, b0010, b4115, b3927, b1380	ACt2rpp, ARGAGMt7pp, FADRx, FE3Ri, FLVRx, GLYALDtpp, GLYtpp, LDH_D, TDPDRR, UREAtpp
789	-58.9846	EX_succ_e	7.97599	-7.5	0.157559	6	34.9228	-10.6764	-2.79929	27.7291	9.99301	b0200, b3844, b0010, b4115, b3927, b1380	ACt2rpp, ARGAGMt7pp, FADRx, FE3Ri, FLVRx, GLYALDtpp, GLYtpp, GMHEPPA, LDH_D, UREAtpp
790	-58.9846	EX_succ_e	7.97599	-7.5	0.157559	6	34.9228	-10.6764	-2.79929	27.7291	9.99301	b3844, b4117, b3790, b0010, b3927, b1380	ACt2rpp, ARGDC, FADRx, FE3Ri, FLVRx, GLYALDtpp, GLYtpp, LDH_D, TDPADGAT, UREAtpp
791	-58.9846	EX_succ_e	7.97599	-7.5	0.157559	6	34.9228	-10.6764	-2.79929	27.7291	9.99301	b4481, b3844, b4117, b0010, b3927, b1380	AADDGT, ACt2rpp, ARGDC, FADRx, FE3Ri, FLVRx, GLYALDtpp, GLYtpp, LDH_D, UREAtpp
792	-58.9846	EX_succ_e	7.97599	-7.5	0.157559	6	34.9228	-10.6764	-2.79929	27.7291	9.99301	b2038, b3844, b4117, b0010, b3927, b1380	ACt2rpp, ARGDC, FADRx, FE3Ri, FLVRx, GLYALDtpp, GLYtpp, LDH_D, TDPDRE, UREAtpp
793	-58.9846	EX_succ_e	7.97599	-7.5	0.157559	6	34.9228	-10.6764	-2.79929	27.7291	9.99301	b3844, b4117, b3619, b0010, b3927, b1380	ACt2rpp, AGMHE, ARGDC, FADRx, FE3Ri, FLVRx, GLYALDtpp, GLYtpp, LDH_D, UREAtpp
794	-58.9846	EX_succ_e	7.97599	-7.5	0.157559	6	34.9228	-10.6764	-2.79929	27.7291	9.99301	b3844, b4117, b0010, b3632, b3927, b1380	ACt2rpp, ARGDC, FADRx, FE3Ri, FLVRx, GLYALDtpp, GLYtpp, HEPT3, LDH_D, UREAtpp
795	-58.9846	EX_succ_e	7.97599	-7.5	0.157559	6	34.9228	-10.6764	-2.79929	27.7291	9.99301	b0200, b3844, b4117, b0010, b3927, b1380	ACt2rpp, ARGDC, FADRx, FE3Ri, FLVRx, GLYALDtpp, GLYtpp, GMHEPPA, LDH_D, UREAtpp
796	-58.9846	EX_succ_e	7.97599	-7.5	0.157559	6	34.9228	-10.6764	-2.79929	27.7291	9.99301	b3844, b3791, b0010, b4115, b3927, b1380	ACt2rpp, ARGAGMt7pp, FADRx, FE3Ri, FLVRx, GLYALDtpp, GLYtpp, LDH_D, TDPAGTA, UREAtpp
797	-58.9846	EX_succ_e	7.97599	-7.5	0.157559	6	34.9228	-10.6764	-2.79929	27.7291	9.99301	b3844, b0010, b4115, b3624, b3927, b1380	ACt2rpp, ARGAGMt7pp, FADRx, FE3Ri, FLVRx, GLYALDtpp, GLYtpp, LDH_D, MOAT3C, UREAtpp
798	-58.9846	EX_succ_e	7.97599	-7.5	0.157559	6	34.9228	-10.6764	-2.79929	27.7291	9.99301	b0222, b3844, b0010, b4115, b3927, b1380	ACt2rpp, ARGAGMt7pp, FADRx, FE3Ri, FLVRx, GLYALDtpp, GLYtpp, LDH_D, S7PI, UREAtpp
799	-58.9846	EX_succ_e	7.97599	-7.5	0.157559	6	34.9228	-10.6764	-2.79929	27.7291	9.99301	b3844, b4117, b0010, b3631, b3927, b1380	ACt2rpp, ARGDC, FADRx, FE3Ri, FLVRx, GLCTR1, GLYALDtpp, GLYtpp, LDH_D, UREAtpp
800	-58.9846	EX_succ_e	7.97599	-7.5	0.157559	6	34.9228	-10.6764	-2.79929	27.7291	9.99301	b3844, b4117, b0010, b4077, b3927, b1380	ACt2rpp, ARGDC, ASPt2pp, FADRx, FE3Ri, FLVRx, GLUt2rpp, GLYALDtpp, GLYtpp, LDH_D, UREAtpp
801	-58.9846	EX_succ_e	7.97599	-7.5	0.157559	6	34.9228	-10.6764	-2.79929	27.7291	9.99301	b3844, b4117, b4013, b0010, b3927, b1380	ACt2rpp, ARGDC, FADRx, FE3Ri, FLVRx, GLYALDtpp, GLYtpp, HSST, LDH_D, UREAtpp
802	-58.9846	EX_succ_e	7.97599	-7.5	0.157559	6	34.9228	-10.6764	-2.79929	27.7291	9.99301	b3844, b4117, b3939, b0010, b3927, b1380	ACt2rpp, ARGDC, FADRx, FE3Ri, FLVRx, GLYALDtpp, GLYtpp, LDH_D, SHSL1, UREAtpp
803	-58.9846	EX_succ_e	7.97599	-7.5	0.157559	6	34.9228	-10.6764	-2.79929	27.7291	9.99301	b3844, b4013, b0010, b4115, b3927, b1380	ACt2rpp, ARGAGMt7pp, FADRx, FE3Ri, FLVRx, GLYALDtpp, GLYtpp, HSST, LDH_D, UREAtpp
804	-58.9846	EX_succ_e	7.97599	-7.5	0.157559	6	34.9228	-10.6764	-2.79929	27.7291	9.99301	b3844, b4117, b0010, b3927, b1380, b0432	ACt2rpp, ARGDC, CYTBO3_4pp, FADRx, FE3Ri, FLVRx, GLYALDtpp, GLYtpp, LDH_D, UREAtpp
805	-58.9846	EX_succ_e	7.97599	-7.5	0.157559	6	34.9228	-10.6764	-2.79929	27.7291	9.99301	b3844, b4117, b0010, b3927, b1380, b0430	ACt2rpp, ARGDC, CYTBO3_4pp, FADRx, FE3Ri, FLVRx, GLYALDtpp, GLYtpp, LDH_D, UREAtpp
806	-58.9846	EX_succ_e	7.97599	-7.5	0.157559	6	34.9228	-10.6764	-2.79929	27.7291	9.99301	b3844, b4117, b0010, b3927, b1380, b0429	ACt2rpp, ARGDC, CYTBO3_4pp, FADRx, FE3Ri, FLVRx, GLYALDtpp, GLYtpp, LDH_D, UREAtpp
807	-58.9846	EX_succ_e	7.97599	-7.5	0.157559	6	34.9228	-10.6764	-2.79929	27.7291	9.99301	b3844, b4117, b0010, b3927, b1380, b1285	ACt2rpp, ARGDC, FADRx, FE3Ri, FLVRx, GLYALDtpp, GLYtpp, LDGUNPD, LDH_D, UREAtpp
808	-58.9846	EX_succ_e	7.97599	-7.5	0.157559	6	34.9228	-10.6764	-2.79929	27.7291	9.99301	b3844, b0032, b0010, b4115, b3927, b1380	ACt2rpp, ARGAGMt7pp, CBPS, FADRx, FE3Ri, FLVRx, GLYALDtpp, GLYtpp, LDH_D, UREAtpp
809	-58.9846	EX_succ_e	7.97599	-7.5	0.157559	6	34.9228	-10.6764	-2.79929	27.7291	9.99301	b3844, b4117, b0032, b0010, b3927, b1380	ACt2rpp, ARGDC, CBPS, FADRx, FE3Ri, FLVRx, GLYALDtpp, GLYtpp, LDH_D, UREAtpp
810	-58.9846	EX_succ_e	7.97599	-7.5	0.157559	6	34.9228	-10.6764	-2.79929	27.7291	9.99301	b3844, b4117, b0010, b2150, b3927, b1380	ACt2rpp, ARGDC, FADRx, FE3Ri, FLVRx, GLCabcpp, GLYALDtpp, GLYtpp, LDH_D, UREAtpp
811	-58.9846	EX_succ_e	7.97599	-7.5	0.157559	6	34.9228	-10.6764	-2.79929	27.7291	9.99301	b3844, b4117, b0010, b2149, b3927, b1380	ACt2rpp, ARGDC, FADRx, FE3Ri, FLVRx, GLCabcpp, GLYALDtpp, GLYtpp, LDH_D, UREAtpp
812	-58.9846	EX_succ_e	7.97599	-7.5	0.157559	6	34.9228	-10.6764	-2.79929	27.7291	9.99301	b3844, b0010, b4115, b2148, b3927, b1380	ACt2rpp, ARGAGMt7pp, FADRx, FE3Ri, FLVRx, GLCabcpp, GLYALDtpp, GLYtpp, LDH_D, UREAtpp
813	-58.9846	EX_succ_e	7.97599	-7.5	0.157559	6	34.9228	-10.6764	-2.79929	27.7291	9.99301	b3844, b3449, b0010, b4115, b3927, b1380	ACt2rpp, ARGAGMt7pp, FADRx, FE3Ri, FLVRx, GLYALDtpp, GLYtpp, GPDDA1, GPDDA2, GPDDA3, GPDDA4, GPDDA5, LDH_D, UREAtpp
814	-58.9846	EX_succ_e	7.97599	-7.5	0.157559	6	34.9228	-10.6764	-2.79929	27.7291	9.99301	b3844, b4117, b0010, b1300, b3927, b1380	3HPADHi, ACt2rpp, ARGDC, FADRx, FE3Ri, FLVRx, GGGABADr, GLYALDtpp, GLYtpp, LDH_D, UREAtpp
815	-58.9846	EX_succ_e	7.97599	-7.5	0.157559	6	34.9228	-10.6764	-2.79929	27.7291	9.99301	b3844, b4117, b0010, b1297, b3927, b1380	ACt2rpp, ARGDC, FADRx, FE3Ri, FLVRx, GGPTRCS, GLYALDtpp, GLYtpp, LDH_D, UREAtpp
816	-58.9846	EX_succ_e	7.97599	-7.5	0.157559	6	34.9228	-10.6764	-2.79929	27.7291	9.99301	b3844, b4117, b0010, b3927, b1380, b1301	ACt2rpp, ARGDC, FADRx, FE3Ri, FLVRx, GGPTRCO, GLYALDtpp, GLYtpp, LDH_D, UREAtpp
817	-58.9846	EX_succ_e	7.97599	-7.5	0.157559	6	34.9228	-10.6764	-2.79929	27.7291	9.99301	b3844, b4117, b0010, b1298, b3927, b1380	ACt2rpp, ARGDC, FADRx, FE3Ri, FLVRx, GGGABAH, GLYALDtpp, GLYtpp, LDH_D, UREAtpp
818	-58.9846	EX_succ_e	7.97599	-7.5	0.157559	6	34.9228	-10.6764	-2.79929	27.7291	9.99301	b3844, b0010, b4115, b2366, b3927, b1380	ACt2rpp, ARGAGMt7pp, FADRx, FE3Ri, FLVRx, GLYALDtpp, GLYtpp, LDH_D, SERD_D, UREAtpp
819	-58.9846	EX_succ_e	7.97599	-7.5	0.157559	6	34.9228	-10.6764	-2.79929	27.7291	9.99301	b3844, b4117, b0010, b2366, b3927, b1380	ACt2rpp, ARGDC, FADRx, FE3Ri, FLVRx, GLYALDtpp, GLYtpp, LDH_D, SERD_D, UREAtpp
820	-58.9846	EX_succ_e	7.97599	-7.5	0.157559	6	34.9228	-10.6764	-2.79929	27.7291	9.99301	b3844, b4117, b3665, b0010, b3927, b1380	ACt2rpp, ADD, ARGDC, FADRx, FE3Ri, FLVRx, GLYALDtpp, GLYtpp, LDH_D, UREAtpp
821	-58.9846	EX_succ_e	7.97599	-7.5	0.157559	6	34.9228	-10.6764	-2.79929	27.7291	9.99301	b3844, b3665, b0010, b4115, b3927, b1380	ACt2rpp, ADD, ARGAGMt7pp, FADRx, FE3Ri, FLVRx, GLYALDtpp, GLYtpp, LDH_D, UREAtpp
822	-58.9846	EX_succ_e	7.97599	-7.5	0.157559	6	34.9228	-10.6764	-2.79929	27.7291	9.99301	b3844, b4117, b0010, b0698, b3927, b1380	ACt2rpp, ARGDC, FADRx, FE3Ri, FLVRx, GLYALDtpp, GLYtpp, Kabcpp, LDH_D, UREAtpp
823	-58.9846	EX_succ_e	7.97599	-7.5	0.157559	6	34.9228	-10.6764	-2.79929	27.7291	9.99301	b3844, b4117, b0333, b0010, b3927, b1380	ACt2rpp, ARGDC, FADRx, FE3Ri, FLVRx, GLYALDtpp, GLYtpp, LDH_D, MCITS, UREAtpp
824	-58.9846	EX_succ_e	7.97599	-7.5	0.157559	6	34.9228	-10.6764	-2.79929	27.7291	9.99301	b3844, b0010, b4115, b3927, b1380, b0118	ACt2rpp, ARGAGMt7pp, FADRx, FE3Ri, FLVRx, GLYALDtpp, GLYtpp, LDH_D, MICITDr, UREAtpp
825	-58.9846	EX_succ_e	7.97599	-7.5	0.157559	6	34.9228	-10.6764	-2.79929	27.7291	9.99301	b0945, b3844, b4117, b0010, b3927, b1380	ACt2rpp, ARGDC, DHORD2, DHORD5, FADRx, FE3Ri, FLVRx, GLYALDtpp, GLYtpp, LDH_D, UREAtpp
826	-58.9846	EX_succ_e	7.97599	-7.5	0.157559	6	34.9228	-10.6764	-2.79929	27.7291	9.99301	b3844, b0004, b0010, b4115, b3927, b1380	ACt2rpp, ARGAGMt7pp, FADRx, FE3Ri, FLVRx, GLYALDtpp, GLYtpp, LDH_D, THRS, UREAtpp
827	-58.9846	EX_succ_e	7.97599	-7.5	0.157559	6	34.9228	-10.6764	-2.79929	27.7291	9.99301	b3844, b4117, b0010, b1489, b3927, b1380	ACt2rpp, ARGDC, FADRx, FE3Ri, FLVRx, GLYALDtpp, GLYtpp, LDH_D, PDE4, UREAtpp
828	-58.9846	EX_succ_e	7.97599	-7.5	0.157559	6	34.9228	-10.6764	-2.79929	27.7291	9.99301	b2243, b3844, b0010, b4115, b3927, b1380	ACt2rpp, ARGAGMt7pp, FADRx, FE3Ri, FLVRx, G3PD6, G3PD7, GLYALDtpp, GLYtpp, LDH_D, UREAtpp
829	-58.9846	EX_succ_e	7.97599	-7.5	0.157559	6	34.9228	-10.6764	-2.79929	27.7291	9.99301	b2241, b3844, b0010, b4115, b3927, b1380	ACt2rpp, ARGAGMt7pp, FADRx, FE3Ri, FLVRx, G3PD6, G3PD7, GLYALDtpp, GLYtpp, LDH_D, UREAtpp
830	-58.9846	EX_succ_e	7.97599	-7.5	0.157559	6	34.9228	-10.6764	-2.79929	27.7291	9.99301	b3844, b4117, b0010, b0150, b3927, b1380	ACt2rpp, ARGDC, FADRx, FE3HOXtonex, FE3Ri, FECRMtonex, FEOXAMtonex, FLVRx, GLYALDtpp, GLYtpp, LDH_D, UREAtpp
831	-58.9846	EX_succ_e	7.97599	-7.5	0.157559	6	34.9228	-10.6764	-2.79929	27.7291	9.99301	b3844, b4117, b0010, b3927, b1380, b0516	ACt2rpp, ALLTAMH2, ARGDC, FADRx, FE3Ri, FLVRx, GLYALDtpp, GLYtpp, LDH_D, UREAtpp
832	-58.9846	EX_succ_e	7.97599	-7.5	0.157559	6	34.9228	-10.6764	-2.79929	27.7291	9.99301	b0512, b3844, b0010, b4115, b3927, b1380	ACt2rpp, ALLTN, ARGAGMt7pp, FADRx, FE3Ri, FLVRx, GLYALDtpp, GLYtpp, LDH_D, UREAtpp
833	-58.9846	EX_succ_e	7.97599	-7.5	0.157559	6	34.9228	-10.6764	-2.79929	27.7291	9.99301	b3844, b4117, b0010, b0612, b3927, b1380	ACt2rpp, ARGDC, CITt7pp, FADRx, FE3Ri, FLVRx, GLYALDtpp, GLYtpp, LDH_D, UREAtpp
834	-58.9846	EX_succ_e	7.97599	-7.5	0.157559	6	34.9228	-10.6764	-2.79929	27.7291	9.99301	b3844, b4117, b0010, b3451, b3927, b1380	ACt2rpp, ARGDC, FADRx, FE3Ri, FLVRx, G3PCabcpp, G3PEabcpp, G3PGabcpp, G3PIabcpp, G3PSabcpp, GLYALDtpp, GLYC2Pabcpp, GLYC3Pabcpp, GLYtpp, LDH_D, UREAtpp
835	-58.9846	EX_succ_e	7.97599	-7.5	0.157559	6	34.9228	-10.6764	-2.79929	27.7291	9.99301	b3844, b4117, b0010, b3453, b3927, b1380	ACt2rpp, ARGDC, FADRx, FE3Ri, FLVRx, G3PCabcpp, G3PEabcpp, G3PGabcpp, G3PIabcpp, G3PSabcpp, GLYALDtpp, GLYC2Pabcpp, GLYC3Pabcpp, GLYtpp, LDH_D, UREAtpp
836	-58.9846	EX_succ_e	7.97599	-7.5	0.157559	6	34.9228	-10.6764	-2.79929	27.7291	9.99301	b3844, b4117, b0010, b3452, b3927, b1380	ACt2rpp, ARGDC, FADRx, FE3Ri, FLVRx, G3PCabcpp, G3PEabcpp, G3PGabcpp, G3PIabcpp, G3PSabcpp, GLYALDtpp, GLYC2Pabcpp, GLYC3Pabcpp, GLYtpp, LDH_D, UREAtpp
837	-58.9846	EX_succ_e	7.97599	-7.5	0.157559	6	34.9228	-10.6764	-2.79929	27.7291	9.99301	b3844, b4117, b0010, b3927, b1380, b1378	ACt2rpp, ARGDC, FADRx, FE3Ri, FLVRx, GLYALDtpp, GLYtpp, LDH_D, POR5, UREAtpp
838	-58.9846	EX_succ_e	7.97599	-7.5	0.157559	6	34.9228	-10.6764	-2.79929	27.7291	9.99301	b3844, b4117, b0010, b2954, b3927, b1380	ACt2rpp, ARGDC, FADRx, FE3Ri, FLVRx, GLYALDtpp, GLYtpp, LDH_D, NTPP10, NTPP11, NTPP9, UREAtpp
839	-58.9846	EX_succ_e	7.976	-7.5	0.157557	6	34.9228	-10.6764	-2.79929	27.7291	9.99299	b4384, b3844, b4117, b0010, b3927, b1380	ACt2rpp, ARGDC, FADRx, FE3Ri, FLVRx, GLYALDtpp, GLYtpp, LDH_D, PUNP1, PUNP2, UREAtpp
840	-58.9846	EX_succ_e	7.97599	-7.5	0.157558	6	34.9228	-10.6764	-2.79929	27.7291	9.99299	b3844, b4117, b0010, b2320, b3927, b1380	ACt2rpp, ARGDC, FADRx, FE3Ri, FLVRx, GLYALDtpp, GLYtpp, LDH_D, PERD, UREAtpp
841	-58.9846	EX_succ_e	7.97599	-7.5	0.157558	6	34.9228	-10.6764	-2.79929	27.7291	9.99299	b3844, b0010, b4115, b2320, b3927, b1380	ACt2rpp, ARGAGMt7pp, FADRx, FE3Ri, FLVRx, GLYALDtpp, GLYtpp, LDH_D, PERD, UREAtpp
842	-58.9846	EX_succ_e	7.97599	-7.5	0.157558	6	34.9228	-10.6764	-2.79929	27.7291	9.99299	b3844, b0907, b4117, b0010, b3927, b1380	ACt2rpp, ARGDC, FADRx, FE3Ri, FLVRx, GLYALDtpp, GLYtpp, LDH_D, OHPBAT, PSERT, UREAtpp
843	-58.9839	EX_succ_e	7.97624	-7.5	0.157382	6	34.9213	-10.6748	-2.79931	27.7291	9.99147	b3708, b3844, b4117, b0010, b3927, b1380	ACt2rpp, ARGDC, FADRx, FE3Ri, FLVRx, GLYALDtpp, GLYtpp, LDH_D, TRPAS2, UREAtpp
844	-58.9829	EX_succ_e	7.97599	-7.5	0.157559	4	34.9228	-11.0799	-2.79929	27.7291	9.99301	b4117, b0010, b3927, b1380	ACt2rpp, ARGDC, GLYALDtpp, GLYtpp, LDH_D, UREAtpp
845	-58.9829	EX_succ_e	7.97599	-7.5	0.157559	4	34.9228	-11.0799	-2.79929	27.7291	9.99301	b0010, b4115, b3927, b1380	ACt2rpp, ARGAGMt7pp, GLYALDtpp, GLYtpp, LDH_D, UREAtpp
846	-58.9822	EX_succ_e	7.97599	-7.5	0.157559	7	34.9228	-10.4813	-2.79929	27.7291	9.99301	b3844, b3236, b4117, b0010, b3927, b1380, b2309	ACt2rpp, ARGDC, FADRx, FE3Ri, FLVRx, GLYALDtpp, GLYtpp, HISabcpp, LDH_D, MDH, UREAtpp
847	-58.9819	EX_succ_e	7.97615	-7.5	0.15745	6	34.9201	-10.6764	-2.79947	27.7278	9.99171	b3844, b0010, b4115, b1918, b3927, b1380	ACt2rpp, ARGAGMt7pp, CYSabcpp, FADRx, FE3Ri, FLVRx, GLYALDtpp, GLYtpp, LDH_D, UREAtpp
848	-58.9814	EX_succ_e	7.97624	-7.5	0.157382	7	34.9213	-10.4797	-2.79931	27.7291	9.99147	b3844, b2463, b4117, b0010, b3035, b3927, b1380	ACt2rpp, ARGDC, CMtpp, DOXRBCNtpp, FADRx, FE3Ri, FEENTERtex, FLVRx, FUSAtpp, GLYALDtpp, GLYtpp, INDOLEt2pp, LDH_D, ME2, MINCYCtpp, NOVBCNtpp, RFAMPtpp, TTRCYCtpp, UREAtpp
849	-58.9814	EX_succ_e	7.97652	-7.5	0.15718	6	34.9195	-10.6764	-2.79933	27.7292	9.98971	b3844, b0010, b4115, b1605, b3927, b1380	ACt2rpp, ARGAGMt7pp, ARGORNt7pp, FADRx, FE3Ri, FLVRx, GLYALDtpp, GLYtpp, LDH_D, UREAtpp
850	-58.9814	EX_succ_e	7.97652	-7.5	0.15718	6	34.9195	-10.6764	-2.79933	27.7292	9.98971	b3844, b4117, b0010, b1605, b3927, b1380	ACt2rpp, ARGDC, ARGORNt7pp, FADRx, FE3Ri, FLVRx, GLYALDtpp, GLYtpp, LDH_D, UREAtpp
851	-58.9809	EX_succ_e	7.97659	-7.5	0.157134	6	34.9191	-10.6764	-2.79933	27.7292	9.98931	b3844, b4117, b0010, b0811, b3927, b1380	ACt2rpp, ARGDC, FADRx, FE3Ri, FLVRx, GLNabcpp, GLYALDtpp, GLYtpp, LDH_D, UREAtpp
852	-58.9809	EX_succ_e	7.97659	-7.5	0.157134	6	34.9191	-10.6764	-2.79933	27.7292	9.98931	b3844, b4117, b0010, b0810, b3927, b1380	ACt2rpp, ARGDC, FADRx, FE3Ri, FLVRx, GLNabcpp, GLYALDtpp, GLYtpp, LDH_D, UREAtpp
853	-58.9808	EX_succ_e	7.97661	-7.5	0.15712	6	34.919	-10.6764	-2.79933	27.7292	9.98919	b3844, b0010, b4115, b3927, b1380, b2156	ACt2rpp, ARGAGMt7pp, FADRx, FE3Ri, FLVRx, GLYALDtpp, GLYtpp, LDH_D, LYSt2pp, UREAtpp
854	-58.9784	EX_succ_e	7.977	-7.5	0.15684	6	34.9166	-10.6764	-2.79936	27.7292	9.98676	b3844, b4117, b0010, b1453, b3927, b1380	ACt2rpp, ARGDC, ASNt2rpp, FADRx, FE3Ri, FLVRx, GLYALDtpp, GLYtpp, LDH_D, UREAtpp
855	-58.977	EX_succ_e	7.97723	-7.5	0.156679	6	34.9152	-10.6764	-2.79937	27.7292	9.98536	b0910, b3844, b4117, b0010, b3927, b1380	ACt2rpp, ARGDC, CYTK1, CYTK2, FADRx, FE3Ri, FLVRx, GLYALDtpp, GLYtpp, LDH_D, UREAtpp
856	-58.9758	EX_succ_e	7.97743	-7.5	0.156536	6	34.914	-10.6764	-2.79938	27.7293	9.98411	b3846, b3844, b4117, b0010, b3927, b1380	ACt2rpp, ARGDC, CTECOAI6, CTECOAI7, CTECOAI8, FADRx, FE3Ri, FLVRx, GLYALDtpp, GLYtpp, LDH_D, UREAtpp
857	-58.9758	EX_succ_e	7.97657	-7.5	0.157145	6	34.9096	-10.6676	-2.79992	27.7223	9.98722	b3844, b4117, b2903, b0010, b2957, b1380	ACt2rpp, ARGDC, ASNNpp, FADRx, FE3Ri, FLVRx, GLUNpp, GLYCL, LDH_D
858	-58.9754	EX_succ_e	7.97592	-7.5	0.157608	6	34.9135	-10.6763	-2.79988	27.7222	9.99124	b3844, b4117, b2903, b1603, b0010, b1380	ACt2rpp, ARGDC, FADRx, FE3Ri, FLVRx, GLYCL, LDH_D, THD2pp
859	-58.9753	EX_succ_e	7.97592	-7.5	0.157608	6	34.9135	-10.6764	-2.79988	27.7222	9.99124	b1264, b3844, b4117, b2903, b0010, b1380	ACt2rpp, ANS, ARGDC, FADRx, FE3Ri, FLVRx, GLYCL, LDH_D
860	-58.9753	EX_succ_e	7.97592	-7.5	0.157608	6	34.9135	-10.6764	-2.79988	27.7222	9.99124	b3844, b4117, b2903, b0010, b3450, b1380	ACt2rpp, ARGDC, FADRx, FE3Ri, FLVRx, G3PCabcpp, G3PEabcpp, G3PGabcpp, G3PIabcpp, G3PSabcpp, GLYC2Pabcpp, GLYC3Pabcpp, GLYCL, LDH_D
861	-58.9753	EX_succ_e	7.97592	-7.5	0.157608	6	34.9135	-10.6764	-2.79988	27.7222	9.99124	b3844, b4117, b2903, b0010, b2835, b1380	2AGPA120tipp, 2AGPA140tipp, 2AGPA141tipp, 2AGPA160tipp, 2AGPA161tipp, 2AGPA180tipp, 2AGPA181tipp, 2AGPE120tipp, 2AGPE140tipp, 2AGPE141tipp, 2AGPE160tipp, 2AGPE161tipp, 2AGPE180tipp, 2AGPE181tipp, 2AGPG120tipp, 2AGPG140tipp, 2AGPG141tipp, 2AGPG160tipp, 2AGPG161tipp, 2AGPG180tipp, 2AGPG181tipp, ACt2rpp, ARGDC, FADRx, FE3Ri, FLVRx, GLYCL, LDH_D
862	-58.9753	EX_succ_e	7.97592	-7.5	0.157608	6	34.9135	-10.6764	-2.79988	27.7222	9.99124	b3430, b3844, b4117, b2903, b0010, b1380	ACt2rpp, ARGDC, FADRx, FE3Ri, FLVRx, GLGC, GLYCL, LDH_D
863	-58.9753	EX_succ_e	7.97592	-7.5	0.157608	6	34.9135	-10.6764	-2.79988	27.7222	9.99124	b3844, b4117, b2903, b0010, b1380, b0356	ACt2rpp, ARGDC, FADRx, FALDH2, FE3Ri, FLVRx, GLYCL, LDH_D
864	-58.9753	EX_succ_e	7.97592	-7.5	0.157608	6	34.9135	-10.6764	-2.79988	27.7222	9.99124	b3844, b4117, b2903, b0010, b0697, b1380	ACt2rpp, ARGDC, FADRx, FE3Ri, FLVRx, GLYCL, Kabcpp, LDH_D
865	-58.9753	EX_succ_e	7.97592	-7.5	0.157608	6	34.9135	-10.6764	-2.79988	27.7222	9.99124	b3844, b4117, b2903, b0010, b0698, b1380	ACt2rpp, ARGDC, FADRx, FE3Ri, FLVRx, GLYCL, Kabcpp, LDH_D
866	-58.9753	EX_succ_e	7.97592	-7.5	0.157608	6	34.9135	-10.6764	-2.79988	27.7222	9.99124	b3844, b4117, b2903, b0010, b0696, b1380	ACt2rpp, ARGDC, FADRx, FE3Ri, FLVRx, GLYCL, Kabcpp, LDH_D
867	-58.9753	EX_succ_e	7.97592	-7.5	0.157608	6	34.9135	-10.6764	-2.79988	27.7222	9.99124	b3844, b4117, b2903, b0010, b1380, b1378	ACt2rpp, ARGDC, FADRx, FE3Ri, FLVRx, GLYCL, LDH_D, POR5
868	-58.9753	EX_succ_e	7.97592	-7.5	0.157608	6	34.9135	-10.6764	-2.79988	27.7222	9.99124	b3844, b4117, b2903, b0614, b0010, b1380	ACt2rpp, ARGDC, CITL, FADRx, FE3Ri, FLVRx, GLYCL, LDH_D
869	-58.9753	EX_succ_e	7.97592	-7.5	0.157608	6	34.9135	-10.6764	-2.79988	27.7222	9.99124	b3844, b4117, b2903, b0616, b0010, b1380	ACt2rpp, ARGDC, CITL, FADRx, FE3Ri, FLVRx, GLYCL, LDH_D
870	-58.9753	EX_succ_e	7.97592	-7.5	0.157608	6	34.9135	-10.6764	-2.79988	27.7222	9.99124	b3844, b4117, b2903, b0010, b4460, b1380	ACt2rpp, ARBabcpp, ARGDC, FADRx, FE3Ri, FLVRx, GLYCL, LDH_D
871	-58.9753	EX_succ_e	7.97592	-7.5	0.157608	6	34.9135	-10.6764	-2.79988	27.7222	9.99124	b3844, b4117, b2903, b0010, b3909, b1380	ACt2rpp, ARGDC, DDGLCNt2rpp, FADRx, FE3Ri, FLVRx, GLYCL, LDH_D
872	-58.9753	EX_succ_e	7.97592	-7.5	0.157608	6	34.9135	-10.6764	-2.79988	27.7222	9.99124	b0678, b3844, b4117, b2903, b0010, b1380	ACt2rpp, ARGDC, FADRx, FE3Ri, FLVRx, G6PDA, GLYCL, LDH_D
873	-58.9753	EX_succ_e	7.97592	-7.5	0.157608	6	34.9135	-10.6764	-2.79988	27.7222	9.99124	b3844, b4117, b2903, b0010, b2866, b1380	ACt2rpp, ARGDC, FADRx, FE3Ri, FLVRx, GLYCL, HXAND, LDH_D, XAND
874	-58.9753	EX_succ_e	7.97592	-7.5	0.157608	6	34.9135	-10.6764	-2.79988	27.7222	9.99124	b3844, b4117, b0758, b2903, b0010, b1380	ACt2rpp, ARGDC, FADRx, FE3Ri, FLVRx, GLYCL, LDH_D, UGLT
875	-58.9753	EX_succ_e	7.97592	-7.5	0.157608	6	34.9135	-10.6764	-2.79988	27.7222	9.99124	b3844, b4117, b2903, b0010, b1380, b1473	ACt2rpp, ARGDC, FADRx, FE3Ri, FLVRx, GLYCL, LDH_D, PHEtipp, TRPtipp, TYRtipp
876	-58.9753	EX_succ_e	7.97592	-7.5	0.157608	6	34.9135	-10.6764	-2.79988	27.7222	9.99124	b3403, b3844, b4117, b2903, b0010, b1380	ACt2rpp, ARGDC, FADRx, FE3Ri, FLVRx, GLYCL, LDH_D, PPCK
877	-58.9753	EX_succ_e	7.97592	-7.5	0.157608	6	34.9135	-10.6764	-2.79988	27.7222	9.99124	b3844, b4117, b2903, b0010, b3161, b1380	ACt2rpp, ARGDC, FADRx, FE3Ri, FLVRx, GLYCL, INDOLEt2rpp, LDH_D
878	-58.9753	EX_succ_e	7.97592	-7.5	0.157608	6	34.9135	-10.6764	-2.79988	27.7222	9.99124	b3844, b4117, b2903, b0010, b1380, b1686	ACt2rpp, ARGDC, DHNCOAT, FADRx, FE3Ri, FLVRx, GLYCL, LDH_D
879	-58.9753	EX_succ_e	7.97592	-7.5	0.157608	6	34.9135	-10.6764	-2.79988	27.7222	9.99124	b3844, b4117, b2903, b0010, b1380, b3930	ACt2rpp, ARGDC, DHNAOT4, FADRx, FE3Ri, FLVRx, GLYCL, LDH_D
880	-58.9753	EX_succ_e	7.97592	-7.5	0.157608	6	34.9135	-10.6764	-2.79988	27.7222	9.99124	b3844, b4117, b2903, b0010, b2501, b1380	ACt2rpp, ARGDC, FADRx, FE3Ri, FLVRx, GLYCL, LDH_D, PPK, PPK2
881	-58.9753	EX_succ_e	7.97592	-7.5	0.157608	6	34.9135	-10.6764	-2.79988	27.7222	9.99124	b2221, b3844, b4117, b2903, b0010, b1380	ACt2rpp, ARGDC, BUTCT, FADRx, FE3Ri, FLVRx, GLYCL, HXCT, LDH_D
882	-58.9753	EX_succ_e	7.97592	-7.5	0.157608	6	34.9135	-10.6764	-2.79988	27.7222	9.99124	b3844, b4117, b2903, b0010, b1380, b1821	ACt2rpp, ARGDC, FADRx, FE3Ri, FLVRx, GLYCL, LDH_D, MN2tipp
883	-58.9753	EX_succ_e	7.97592	-7.5	0.157608	6	34.9135	-10.6764	-2.79988	27.7222	9.99124	b3844, b4117, b2903, b0010, b1380, b1389	ACt2rpp, ARGDC, FADRx, FE3Ri, FLVRx, GLYCL, LDH_D, PACCOAE
884	-58.9753	EX_succ_e	7.97592	-7.5	0.157608	6	34.9135	-10.6764	-2.79988	27.7222	9.99124	b3844, b4117, b2903, b0010, b1380, b1388	ACt2rpp, ARGDC, FADRx, FE3Ri, FLVRx, GLYCL, LDH_D, PACCOAE
885	-58.9753	EX_succ_e	7.97592	-7.5	0.157608	6	34.9135	-10.6764	-2.79988	27.7222	9.99124	b3844, b4117, b2903, b0010, b1380, b2906	ACt2rpp, ARGDC, FADRx, FE3Ri, FLVRx, GLYCL, LDH_D, OPHHXy
886	-58.9753	EX_succ_e	7.97592	-7.5	0.157608	6	34.9135	-10.6764	-2.79988	27.7222	9.99124	b3844, b4117, b2903, b0010, b3432, b1380	ACt2rpp, ARGDC, FADRx, FE3Ri, FLVRx, GLBRAN2, GLYCL, LDH_D
887	-58.9753	EX_succ_e	7.97592	-7.5	0.157608	6	34.9135	-10.6764	-2.79988	27.7222	9.99124	b3844, b4117, b2903, b0010, b3726, b1380	ACt2rpp, ARGDC, FADRx, FE3Ri, FLVRx, GLYCL, LDH_D, PIuabcpp
888	-58.9753	EX_succ_e	7.97592	-7.5	0.157608	6	34.9135	-10.6764	-2.79988	27.7222	9.99124	b3844, b4117, b2903, b0010, b3727, b1380	ACt2rpp, ARGDC, FADRx, FE3Ri, FLVRx, GLYCL, LDH_D, PIuabcpp
889	-58.9753	EX_succ_e	7.97592	-7.5	0.157608	6	34.9135	-10.6764	-2.79988	27.7222	9.99124	b3844, b4117, b2903, b0010, b1380, b2670	ACt2rpp, ALAtpp, ARGDC, FADRx, FE3Ri, FLVRx, GLYCL, LDH_D
890	-58.9753	EX_succ_e	7.97592	-7.5	0.157608	6	34.9135	-10.6764	-2.79988	27.7222	9.99124	b3844, b4117, b2903, b0010, b1380, b3924	ACt2rpp, ARGDC, FADRx, FE3Ri, FLDR2, FLVRx, GLYCL, LDH_D
891	-58.9753	EX_succ_e	7.97592	-7.5	0.157608	6	34.9135	-10.6764	-2.79988	27.7222	9.99124	b3844, b4117, b2903, b0010, b3502, b1380	ACt2rpp, ARGDC, ASO3t8pp, FADRx, FE3Ri, FLVRx, GLYCL, LDH_D
892	-58.9753	EX_succ_e	7.97592	-7.5	0.157608	6	34.9135	-10.6764	-2.79988	27.7222	9.99124	b3844, b4117, b2903, b0010, b1380, b1710	ACt2rpp, ARGDC, FADRx, FE3Ri, FLVRx, GLYCL, GTHPi, LDH_D
893	-58.9753	EX_succ_e	7.97592	-7.5	0.157608	6	34.9135	-10.6764	-2.79988	27.7222	9.99124	b3844, b4117, b2903, b0010, b0731, b1380	ACt2rpp, ARGDC, FADRx, FE3Ri, FLVRx, GLYCL, LDH_D, MANGLYCptspp
894	-58.9753	EX_succ_e	7.97592	-7.5	0.157608	6	34.9135	-10.6764	-2.79988	27.7222	9.99124	b3844, b4117, b2903, b0010, b1380, b1798	ACt2rpp, ARGDC, FADRx, FE3Ri, FLVRx, GLYCL, LDH_D
895	-58.9753	EX_succ_e	7.97592	-7.5	0.157608	6	34.9135	-10.6764	-2.79988	27.7222	9.99124	b3844, b4117, b2903, b0010, b3032, b1380	ACt2rpp, ARGDC, FADRx, FE3Ri, FLVRx, GLYCL, LDH_D
896	-58.9753	EX_succ_e	7.97592	-7.5	0.157608	6	34.9135	-10.6764	-2.79988	27.7222	9.99124	b3844, b4117, b2903, b0010, b3664, b1380	ACt2rpp, ARGDC, FADRx, FE3Ri, FLVRx, GLYCL, LDH_D
897	-58.9753	EX_succ_e	7.97592	-7.5	0.157608	6	34.9135	-10.6764	-2.79988	27.7222	9.99124	b3844, b4117, b2903, b0010, b1380, b0826	ACt2rpp, ARGDC, FADRx, FE3Ri, FLVRx, GLYCL, LDH_D, MPTSS
898	-58.9753	EX_succ_e	7.97592	-7.5	0.157608	6	34.9135	-10.6764	-2.79988	27.7222	9.99124	b3844, b4117, b2903, b0010, b1380, b1430	ACt2rpp, ARGDC, FADRx, FE3Ri, FLVRx, GLYCL, LDH_D, TEO2M
899	-58.9753	EX_succ_e	7.97592	-7.5	0.157608	6	34.9135	-10.6764	-2.79988	27.7222	9.99124	b3844, b4117, b2903, b0010, b2927, b1380	ACt2rpp, ARGDC, FADRx, FE3Ri, FLVRx, GLYCL, LDH_D
900	-58.9753	EX_succ_e	7.97592	-7.5	0.157608	6	34.9135	-10.6764	-2.79988	27.7222	9.99124	b3844, b4117, b2903, b0010, b1270, b1380	ACt2rpp, ARGDC, CBIAT, CBLAT, FADRx, FE3Ri, FLVRx, GLYCL, LDH_D
901	-58.9753	EX_succ_e	7.97592	-7.5	0.157608	6	34.9135	-10.6764	-2.79988	27.7222	9.99124	b3844, b4117, b2903, b0241, b0010, b1380	ACt2rpp, ARGDC, FADRx, FE3Ri, FLVRx, GLYCL, LDH_D
902	-58.9753	EX_succ_e	7.97592	-7.5	0.157608	6	34.9135	-10.6764	-2.79988	27.7222	9.99124	b3812, b3844, b4117, b2903, b0010, b1380	ACt2rpp, ARGDC, FADRx, FE3Ri, FLVRx, GLYCL, LDH_D
903	-58.9753	EX_succ_e	7.97592	-7.5	0.157608	6	34.9135	-10.6764	-2.79988	27.7222	9.99124	b3844, b4117, b2903, b0010, b2995, b1380	ACt2rpp, ARGDC, FADRx, FE3Ri, FLVRx, GLYCL, LDH_D
904	-58.9753	EX_succ_e	7.97592	-7.5	0.157608	6	34.9135	-10.6764	-2.79988	27.7222	9.99124	b3126, b3844, b4117, b2903, b0010, b1380	ACt2rpp, ARGDC, FADRx, FE3Ri, FLVRx, GLCRAL, GLYCL, LDH_D
905	-58.9753	EX_succ_e	7.97592	-7.5	0.157608	6	34.9135	-10.6764	-2.79988	27.7222	9.99124	b3844, b4117, b2903, b0010, b2258, b1380	ACt2rpp, ARGDC, FADRx, FE3Ri, FLVRx, GLYCL, LDH_D, ULA4Ntppi
906	-58.9753	EX_succ_e	7.97592	-7.5	0.157608	6	34.9135	-10.6764	-2.79988	27.7222	9.99124	b0125, b3844, b4117, b2903, b0010, b1380	ACt2rpp, ARGDC, FADRx, FE3Ri, FLVRx, GLYCL, LDH_D
907	-58.9753	EX_succ_e	7.97592	-7.5	0.157608	6	34.9135	-10.6764	-2.79988	27.7222	9.99124	b3844, b4117, b2903, b0010, b1380, b4474	ACt2rpp, ARGDC, FADRx, FE3Ri, FLVRx, FRULYSE, GLYCL, LDH_D
908	-58.9753	EX_succ_e	7.97592	-7.5	0.157608	6	34.9135	-10.6764	-2.79988	27.7222	9.99124	b3844, b4117, b2903, b0010, b1380, b4386	ACt2rpp, ARGDC, FADRx, FE3Ri, FLVRx, GLYCL, LDH_D, LIPAMPL, LIPATPT, OCTNLL
909	-58.9753	EX_succ_e	7.97592	-7.5	0.157608	6	34.9135	-10.6764	-2.79988	27.7222	9.99124	b3844, b4117, b1302, b2903, b0010, b1380	ACt2rpp, ARGDC, FADRx, FE3Ri, FLVRx, GLYCL, LDH_D
910	-58.9753	EX_succ_e	7.97592	-7.5	0.157608	6	34.9135	-10.6764	-2.79988	27.7222	9.99124	b3844, b4117, b2903, b0010, b0849, b1380	ACt2rpp, ARGDC, FADRx, FE3Ri, FLVRx, GLYCL, LDH_D
911	-58.9753	EX_succ_e	7.97592	-7.5	0.157608	6	34.9135	-10.6764	-2.79988	27.7222	9.99124	b3844, b4117, b2903, b0010, b1441, b1380	ACt2rpp, ARGDC, FADRx, FE3Ri, FLVRx, GLYCL, LDH_D
912	-58.9753	EX_succ_e	7.97592	-7.5	0.157608	6	34.9135	-10.6764	-2.79988	27.7222	9.99124	b3844, b4117, b2903, b0010, b2482, b1380	ACt2rpp, ARGDC, FADRx, FE3Ri, FLVRx, GLYCL, LDH_D
913	-58.9753	EX_succ_e	7.97592	-7.5	0.157608	6	34.9135	-10.6764	-2.79988	27.7222	9.99124	b3844, b4117, b2903, b0010, b1380, b4092	ACt2rpp, ARGDC, FADRx, FE3Ri, FLVRx, GLYCL, LDH_D, PRCPD
914	-58.9753	EX_succ_e	7.97592	-7.5	0.157608	6	34.9135	-10.6764	-2.79988	27.7222	9.99124	b3844, b0368, b4117, b2903, b0010, b1380	ACt2rpp, ARGDC, FADRx, FE3Ri, FLVRx, GLYCL, LDH_D, TAUDO
915	-58.9753	EX_succ_e	7.97592	-7.5	0.157608	6	34.9135	-10.6764	-2.79988	27.7222	9.99124	b3844, b4117, b2903, b0010, b4120, b1380	ACt2rpp, ARGDC, FADRx, FE3Ri, FLVRx, GLYCL, LDH_D
916	-58.9753	EX_succ_e	7.97592	-7.5	0.157608	6	34.9135	-10.6764	-2.79988	27.7222	9.99124	b3925, b3844, b4117, b2903, b0010, b1380	ACt2rpp, ARGDC, FADRx, FE3Ri, FLVRx, GLYCL, LDH_D
917	-58.9753	EX_succ_e	7.97592	-7.5	0.157608	6	34.9135	-10.6764	-2.79988	27.7222	9.99124	b3844, b4117, b2903, b0010, b3578, b1380	23DOGULNt4pp, ACt2rpp, ARGDC, FADRx, FE3Ri, FLVRx, GLYCL, LDH_D, XYLUt2pp
918	-58.9753	EX_succ_e	7.97592	-7.5	0.157608	6	34.9135	-10.6764	-2.79988	27.7222	9.99124	b3844, b4117, b2903, b0010, b1380, b0462	ACt2rpp, ARGDC, FADRx, FE3Ri, FLVRx, GLYCL, LDH_D
919	-58.9753	EX_succ_e	7.97592	-7.5	0.157608	6	34.9135	-10.6764	-2.79988	27.7222	9.99124	b3844, b4117, b2903, b0010, b2170, b1380	ACt2rpp, ARGDC, FADRx, FE3Ri, FLVRx, GLYCL, LDH_D
920	-58.9753	EX_succ_e	7.97592	-7.5	0.157608	6	34.9135	-10.6764	-2.79988	27.7222	9.99124	b2341, b3844, b4117, b2903, b0010, b1380	ACt2rpp, ARGDC, FADRx, FE3Ri, FLVRx, GLYCL, LDH_D
921	-58.9753	EX_succ_e	7.97592	-7.5	0.157608	6	34.9135	-10.6764	-2.79988	27.7222	9.99124	b3844, b4117, b2903, b0010, b1380, b1487	ACt2rpp, ARGDC, FADRx, FE3Ri, FLVRx, GLYCL, LDH_D
922	-58.9753	EX_succ_e	7.97592	-7.5	0.157608	6	34.9135	-10.6764	-2.79988	27.7222	9.99124	b3844, b4117, b2903, b2202, b0010, b1380	ACt2rpp, ARGDC, FADRx, FE3Ri, FLVRx, GLYCL, LDH_D, NO3R1bpp, NO3R2bpp
923	-58.9753	EX_succ_e	7.97592	-7.5	0.157608	6	34.9135	-10.6764	-2.79988	27.7222	9.99124	b3844, b4117, b2903, b0010, b1723, b1380	ACt2rpp, ARGDC, FADRx, FE3Ri, FLVRx, GLYCL, LDH_D
924	-58.9753	EX_succ_e	7.97592	-7.5	0.157608	6	34.9135	-10.6764	-2.79988	27.7222	9.99124	b2502, b3844, b4117, b2903, b0010, b1380	ACt2rpp, ARGDC, FADRx, FE3Ri, FLVRx, GLYCL, LDH_D
925	-58.9753	EX_succ_e	7.97592	-7.5	0.157608	6	34.9135	-10.6764	-2.79988	27.7222	9.99124	b3844, b4117, b2903, b0010, b3849, b1380	ACt2rpp, ARGDC, FADRx, FE3Ri, FLVRx, GLYCL, LDH_D
926	-58.9753	EX_succ_e	7.97592	-7.5	0.157608	6	34.9135	-10.6764	-2.79988	27.7222	9.99124	b3844, b4117, b2797, b2903, b0010, b1380	ACt2rpp, ARGDC, FADRx, FE3Ri, FLVRx, GLYCL, LDH_D
927	-58.9753	EX_succ_e	7.97592	-7.5	0.157608	6	34.9135	-10.6764	-2.79988	27.7222	9.99124	b3844, b4117, b2903, b2738, b0010, b1380	ACt2rpp, ARGDC, FADRx, FE3Ri, FLVRx, GLYCL, LDH_D
928	-58.9753	EX_succ_e	7.97592	-7.5	0.157608	6	34.9135	-10.6764	-2.79988	27.7222	9.99124	b3844, b4117, b2903, b0010, b3904, b1380	ACt2rpp, ARGDC, FADRx, FE3Ri, FLVRx, GLYCL, LDH_D, RMK
929	-58.9753	EX_succ_e	7.97592	-7.5	0.157608	6	34.9135	-10.6764	-2.79988	27.7222	9.99124	b3844, b4117, b2903, b0010, b0842, b1380	ACt2rpp, ARGDC, FADRx, FE3Ri, FLVRx, GLYCL, LDH_D
930	-58.9753	EX_succ_e	7.97592	-7.5	0.157608	6	34.9135	-10.6764	-2.79988	27.7222	9.99124	b3844, b4117, b2903, b0010, b1761, b1380	ACt2rpp, ARGDC, FADRx, FE3Ri, FLVRx, GLYCL, LDH_D
931	-58.9753	EX_succ_e	7.97592	-7.5	0.157608	6	34.9135	-10.6764	-2.79988	27.7222	9.99124	b0351, b3844, b4117, b2903, b0010, b1380	ACt2rpp, ARGDC, FADRx, FE3Ri, FLVRx, GLYCL, LDH_D
932	-58.9753	EX_succ_e	7.97592	-7.5	0.157608	6	34.9135	-10.6764	-2.79988	27.7222	9.99124	b3844, b4117, b2903, b0010, b2996, b1380	ACt2rpp, ARGDC, FADRx, FE3Ri, FLVRx, GLYCL, LDH_D
933	-58.9753	EX_succ_e	7.97592	-7.5	0.157608	6	34.9135	-10.6764	-2.79988	27.7222	9.99124	b3844, b4117, b2903, b0010, b1308, b1380	ACt2rpp, ARGDC, CYANSTpp, FADRx, FE3Ri, FLVRx, GLYCL, LDH_D
934	-58.9753	EX_succ_e	7.97592	-7.5	0.157608	6	34.9135	-10.6764	-2.79988	27.7222	9.99124	b3008, b3844, b4117, b2903, b0010, b1380	ACt2rpp, ARGDC, FADRx, FE3Ri, FLVRx, GLYCL, LDH_D
935	-58.9753	EX_succ_e	7.97592	-7.5	0.157608	6	34.9135	-10.6764	-2.79988	27.7222	9.99124	b3844, b4117, b2903, b0010, b0756, b1380	ACt2rpp, ARGDC, FADRx, FE3Ri, FLVRx, GALM2pp, GLYCL, LDH_D
936	-58.9753	EX_succ_e	7.97592	-7.5	0.157608	6	34.9135	-10.6764	-2.79988	27.7222	9.99124	b0928, b3844, b4117, b2903, b0010, b1380	ACt2rpp, ARGDC, CYSTA, FADRx, FE3Ri, FLVRx, GLYCL, LDH_D
937	-58.9753	EX_succ_e	7.97592	-7.5	0.157608	6	34.9135	-10.6764	-2.79988	27.7222	9.99124	b3844, b4117, b2903, b0010, b2180, b1380	ACt2rpp, ARGDC, FADRx, FE3Ri, FLVRx, GLYCL, LDH_D
938	-58.9753	EX_succ_e	7.97592	-7.5	0.157608	6	34.9135	-10.6764	-2.79988	27.7222	9.99124	b3844, b4117, b1584, b2903, b0010, b1380	ACt2rpp, ARGDC, FADRx, FE3Ri, FLVRx, GLYCL, LDH_D, SPMDAT1, SPMDAT2
939	-58.9753	EX_succ_e	7.97592	-7.5	0.157608	6	34.9135	-10.6764	-2.79988	27.7222	9.99124	b3844, b4117, b2903, b0010, b1380, b2470	ACt2rpp, ARGDC, FADRx, FE3Ri, FLVRx, GLYCL, LDH_D
940	-58.9753	EX_succ_e	7.97592	-7.5	0.157608	6	34.9135	-10.6764	-2.79988	27.7222	9.99124	b3844, b4117, b2903, b0010, b1654, b1380	ACt2rpp, ARGDC, FADRx, FE3Ri, FLVRx, GLYCL, LDH_D
941	-58.9753	EX_succ_e	7.97592	-7.5	0.157608	6	34.9135	-10.6764	-2.79988	27.7222	9.99124	b3844, b4117, b2903, b0010, b1380, b2796	ACt2rpp, ARGDC, FADRx, FE3Ri, FLVRx, GLYCL, LDH_D
942	-58.9753	EX_succ_e	7.97592	-7.5	0.157608	6	34.9135	-10.6764	-2.79988	27.7222	9.99124	b4053, b3844, b4117, b2903, b0010, b1380	ACt2rpp, ARGDC, FADRx, FE3Ri, FLVRx, GLYCL, LDH_D
943	-58.9753	EX_succ_e	7.97592	-7.5	0.157608	6	34.9135	-10.6764	-2.79988	27.7222	9.99124	b3844, b4117, b2903, b0010, b3772, b1380	ACt2rpp, ARGDC, FADRx, FE3Ri, FLVRx, GLYCL, LDH_D
944	-58.9753	EX_succ_e	7.97592	-7.5	0.157608	6	34.9135	-10.6764	-2.79988	27.7222	9.99124	b3844, b4117, b2903, b2800, b0010, b1380	ACt2rpp, ARGDC, FADRx, FE3Ri, FLVRx, GLYCL, LDH_D
945	-58.9753	EX_succ_e	7.97592	-7.5	0.157608	6	34.9135	-10.6764	-2.79988	27.7222	9.99124	b3844, b4117, b3590, b2903, b0010, b1380	ACt2rpp, ARGDC, FADRx, FE3Ri, FLVRx, GLYCL, LDH_D
946	-58.9753	EX_succ_e	7.97592	-7.5	0.157608	6	34.9135	-10.6764	-2.79988	27.7222	9.99124	b3844, b4117, b2903, b0010, b2914, b1380	ACt2rpp, ARGDC, FADRx, FE3Ri, FLVRx, GLYCL, LDH_D
947	-58.9753	EX_succ_e	7.97592	-7.5	0.157608	6	34.9135	-10.6764	-2.79988	27.7222	9.99124	b3844, b4117, b2903, b0010, b1380, b1734	ACt2rpp, ARGDC, FADRx, FE3Ri, FLVRx, GLYCL, LDH_D, MC6PH
948	-58.9753	EX_succ_e	7.97592	-7.5	0.157608	6	34.9135	-10.6764	-2.79988	27.7222	9.99124	b3844, b4117, b2903, b0010, b4227, b1380	ACt2rpp, ARGDC, FADRx, FE3Ri, FLVRx, GLYCL, LDH_D
949	-58.9753	EX_succ_e	7.97592	-7.5	0.157608	6	34.9135	-10.6764	-2.79988	27.7222	9.99124	b3844, b4117, b2903, b0010, b1380, b0269	ACt2rpp, ARGDC, FADRx, FE3Ri, FLVRx, GLYCL, LDH_D
950	-58.9753	EX_succ_e	7.97592	-7.5	0.157608	6	34.9135	-10.6764	-2.79988	27.7222	9.99124	b3844, b4117, b2903, b0010, b1764, b1380	ACt2rpp, ARGDC, FADRx, FE3Ri, FLVRx, GLYCL, LDH_D, SELNPS
951	-58.9753	EX_succ_e	7.97592	-7.5	0.157608	6	34.9135	-10.6764	-2.79988	27.7222	9.99124	b3844, b4117, b2903, b0010, b4032, b1380	14GLUCANabcpp, ACt2rpp, ARGDC, FADRx, FE3Ri, FLVRx, GLYCL, LDH_D, MALTHXabcpp, MALTPTabcpp, MALTTRabcpp, MALTTTRabcpp, MALTabcpp
952	-58.9753	EX_succ_e	7.97592	-7.5	0.157608	6	34.9135	-10.6764	-2.79988	27.7222	9.99124	b3844, b4117, b2903, b0010, b3290, b1380	ACt2rpp, ARGDC, FADRx, FE3Ri, FLVRx, GLYCL, LDH_D
953	-58.9753	EX_succ_e	7.97592	-7.5	0.157608	6	34.9135	-10.6764	-2.79988	27.7222	9.99124	b3844, b4117, b2903, b0010, b3679, b1380	ACt2rpp, ARGDC, FADRx, FE3Ri, FLVRx, GLYCL, INOSTt4pp, LDH_D
954	-58.9753	EX_succ_e	7.97592	-7.5	0.157608	6	34.9135	-10.6764	-2.79988	27.7222	9.99124	b3844, b4117, b0675, b2903, b0010, b1380	ACt2rpp, ARGDC, FADRx, FE3Ri, FLVRx, GLYCL, LDH_D
955	-58.9753	EX_succ_e	7.97592	-7.5	0.157608	6	34.9135	-10.6764	-2.79988	27.7222	9.99124	b3844, b4117, b2903, b0010, b1380, b0578	ACt2rpp, ARGDC, DHPTDNR, DHPTDNRN, FADRx, FE3Ri, FLVRx, GLYCL, LDH_D
956	-58.9753	EX_succ_e	7.97592	-7.5	0.157608	6	34.9135	-10.6764	-2.79988	27.7222	9.99124	b3844, b4117, b2903, b0010, b0066, b1380	ACt2rpp, ARGDC, FADRx, FE3Ri, FLVRx, GLYCL, LDH_D, THMabcpp
957	-58.9753	EX_succ_e	7.97592	-7.5	0.157608	6	34.9135	-10.6764	-2.79988	27.7222	9.99124	b3844, b4117, b2903, b0010, b2425, b1380	ACt2rpp, ARGDC, FADRx, FE3Ri, FLVRx, GLYCL, LDH_D
958	-58.9753	EX_succ_e	7.97592	-7.5	0.157608	6	34.9135	-10.6764	-2.79988	27.7222	9.99124	b3844, b4117, b2903, b0010, b3824, b1380	ACt2rpp, ARGDC, FADRx, FE3Ri, FLVRx, GLYCL, LDH_D
959	-58.9753	EX_succ_e	7.97592	-7.5	0.157608	6	34.9135	-10.6764	-2.79988	27.7222	9.99124	b3844, b1611, b4117, b2903, b0010, b1380	ACt2rpp, ARGDC, FADRx, FE3Ri, FLVRx, GLYCL, LDH_D
960	-58.9753	EX_succ_e	7.97592	-7.5	0.157608	6	34.9135	-10.6764	-2.79988	27.7222	9.99124	b3844, b4117, b2903, b0010, b2882, b1380	ACt2rpp, ARGDC, FADRx, FE3Ri, FLVRx, GLYCL, LDH_D
961	-58.9753	EX_succ_e	7.97592	-7.5	0.157608	6	34.9135	-10.6764	-2.79988	27.7222	9.99124	b3844, b4117, b2903, b2342, b0010, b1380	ACt2rpp, ARGDC, FADRx, FE3Ri, FLVRx, GLYCL, LDH_D
962	-58.9753	EX_succ_e	7.97592	-7.5	0.157608	6	34.9135	-10.6764	-2.79988	27.7222	9.99124	b3844, b4117, b2903, b0010, b1380, b0632	ACt2rpp, ARGDC, FADRx, FE3Ri, FLVRx, GLYCL, LDH_D
963	-58.9753	EX_succ_e	7.97592	-7.5	0.157608	6	34.9135	-10.6764	-2.79988	27.7222	9.99124	b3885, b3844, b4117, b2903, b0010, b1380	ACt2rpp, ARGDC, FADRx, FE3Ri, FLVRx, GLYCL, LDH_D
964	-58.9753	EX_succ_e	7.97592	-7.5	0.157608	6	34.9135	-10.6764	-2.79988	27.7222	9.99124	b3844, b4117, b0754, b2903, b0010, b1380	ACt2rpp, ARGDC, FADRx, FE3Ri, FLVRx, GLYCL, LDH_D
965	-58.9753	EX_succ_e	7.97592	-7.5	0.157608	6	34.9135	-10.6764	-2.79988	27.7222	9.99124	b3844, b4117, b2903, b0010, b0752, b1380	ACt2rpp, ARGDC, FADRx, FE3Ri, FLVRx, GLYCL, LDH_D
966	-58.9753	EX_succ_e	7.97592	-7.5	0.157608	6	34.9135	-10.6764	-2.79988	27.7222	9.99124	b2465, b3844, b4117, b2903, b0010, b1380	ACt2rpp, ARGDC, FADRx, FE3Ri, FLVRx, GLYCL, LDH_D
967	-58.9753	EX_succ_e	7.97592	-7.5	0.157608	6	34.9135	-10.6764	-2.79988	27.7222	9.99124	b3844, b0340, b4117, b2903, b0010, b1380	ACt2rpp, ARGDC, CYNTAH, FADRx, FE3Ri, FLVRx, GLYCL, LDH_D
968	-58.9753	EX_succ_e	7.97592	-7.5	0.157608	6	34.9135	-10.6764	-2.79988	27.7222	9.99124	b3844, b4117, b2903, b0010, b1380, b2683	ACt2rpp, ARGDC, FADRx, FE3Ri, FLVRx, GLYCL, LDH_D
969	-58.9753	EX_succ_e	7.97592	-7.5	0.157608	6	34.9135	-10.6764	-2.79988	27.7222	9.99124	b3844, b4117, b2903, b0010, b0679, b1380	ACt2rpp, ARGDC, FADRx, FE3Ri, FLVRx, GLYCL, LDH_D
970	-58.9753	EX_succ_e	7.97592	-7.5	0.157608	6	34.9135	-10.6764	-2.79988	27.7222	9.99124	b3844, b4117, b2903, b2203, b0010, b1380	ACt2rpp, ARGDC, FADRx, FE3Ri, FLVRx, GLYCL, LDH_D, NO3R1bpp, NO3R2bpp
971	-58.9753	EX_succ_e	7.97592	-7.5	0.157608	6	34.9135	-10.6764	-2.79988	27.7222	9.99124	b3844, b4117, b2903, b0010, b2224, b1380	ACt2rpp, ARGDC, FADRx, FE3Ri, FLVRx, GLYCL, LDH_D
972	-58.9753	EX_succ_e	7.97592	-7.5	0.157608	6	34.9135	-10.6764	-2.79988	27.7222	9.99124	b3844, b4117, b2903, b0010, b2888, b1380	ACt2rpp, ARGDC, FADRx, FE3Ri, FLVRx, GLYCL, LDH_D, URATEtpp
973	-58.9753	EX_succ_e	7.97592	-7.5	0.157608	6	34.9135	-10.6764	-2.79988	27.7222	9.99124	b3844, b4117, b2903, b0010, b3128, b1380	ACt2rpp, ARGDC, FADRx, FE3Ri, FLVRx, GALCTD, GLYCL, LDH_D
974	-58.9753	EX_succ_e	7.97592	-7.5	0.157608	6	34.9135	-10.6764	-2.79988	27.7222	9.99124	b3844, b4117, b2903, b0010, b0425, b1380	ACt2rpp, ARGDC, FADRx, FE3Ri, FLVRx, GLYCL, LDH_D
975	-58.9753	EX_succ_e	7.97592	-7.5	0.157608	6	34.9135	-10.6764	-2.79988	27.7222	9.99124	b3844, b0688, b4117, b2903, b0010, b1380	ACt2rpp, ARGDC, FADRx, FE3Ri, FLVRx, GLYCL, LDH_D
976	-58.9753	EX_succ_e	7.97592	-7.5	0.157608	6	34.9135	-10.6764	-2.79988	27.7222	9.99124	b3844, b4117, b2903, b0010, b0186, b1380	ACt2rpp, ARGDC, FADRx, FE3Ri, FLVRx, GLYCL, LDH_D
977	-58.9753	EX_succ_e	7.97592	-7.5	0.157608	6	34.9135	-10.6764	-2.79988	27.7222	9.99124	b3844, b4117, b2903, b0010, b0972, b1380	ACt2rpp, ARGDC, FADRx, FE3Ri, FLVRx, GLYCL, LDH_D
978	-58.9753	EX_succ_e	7.97592	-7.5	0.157608	6	34.9135	-10.6764	-2.79988	27.7222	9.99124	b3844, b4117, b4471, b2903, b0010, b1380	ACt2rpp, ARGDC, FADRx, FE3Ri, FLVRx, GLYCL, LDH_D
979	-58.9753	EX_succ_e	7.97592	-7.5	0.157608	6	34.9135	-10.6764	-2.79988	27.7222	9.99124	b3844, b4117, b2903, b0010, b1223, b1380	ACt2rpp, ARGDC, FADRx, FE3Ri, FLVRx, GLYCL, LDH_D
980	-58.9753	EX_succ_e	7.97592	-7.5	0.157608	6	34.9135	-10.6764	-2.79988	27.7222	9.99124	b3844, b4117, b2903, b0010, b0765, b1380	ACt2rpp, ARGDC, FADRx, FE3Ri, FLVRx, GLYCL, LDH_D, TUNGSabcpp
981	-58.9753	EX_succ_e	7.97592	-7.5	0.157608	6	34.9135	-10.6764	-2.79988	27.7222	9.99124	b1589, b3844, b4117, b2903, b0010, b1380	ACt2rpp, ARGDC, FADRx, FE3Ri, FLVRx, GLYCL, LDH_D, SELR
982	-58.9753	EX_succ_e	7.97592	-7.5	0.157608	6	34.9135	-10.6764	-2.79988	27.7222	9.99124	b3844, b4117, b2903, b0010, b4090, b1380	ACt2rpp, ALLPI, ARGDC, FADRx, FE3Ri, FLVRx, GLYCL, LDH_D
983	-58.9753	EX_succ_e	7.97592	-7.5	0.157608	6	34.9135	-10.6764	-2.79988	27.7222	9.99124	b3844, b4117, b2903, b2204, b0010, b1380	ACt2rpp, ARGDC, FADRx, FE3Ri, FLVRx, GLYCL, LDH_D, NO3R1bpp
984	-58.9753	EX_succ_e	7.97592	-7.5	0.157608	6	34.9135	-10.6764	-2.79988	27.7222	9.99124	b3844, b4117, b2903, b0010, b1818, b1380	2DGLCptspp, ACMANAptspp, ACt2rpp, ARGDC, FADRx, FE3Ri, FLVRx, FRUpts2pp, GAMptspp, GLYCL, LDH_D, MANptspp
985	-58.9753	EX_succ_e	7.97592	-7.5	0.157608	6	34.9135	-10.6764	-2.79988	27.7222	9.99124	b1588, b3844, b4117, b2903, b0010, b1380	ACt2rpp, ARGDC, FADRx, FE3Ri, FLVRx, GLYCL, LDH_D, SELR
986	-58.9753	EX_succ_e	7.97592	-7.5	0.157608	6	34.9135	-10.6764	-2.79988	27.7222	9.99124	b3844, b4117, b2601, b2903, b0010, b1380	ACt2rpp, ARGDC, FADRx, FE3Ri, FLVRx, GLYCL, LDH_D
987	-58.9753	EX_succ_e	7.97592	-7.5	0.157608	6	34.9135	-10.6764	-2.79988	27.7222	9.99124	b3844, b4117, b2903, b0010, b0936, b1380	ACt2rpp, ARGDC, ETHSO3abcpp, FADRx, FE3Ri, FLVRx, GLYCL, LDH_D, MSO3abcpp, SULFACabcpp
988	-58.9753	EX_succ_e	7.97592	-7.5	0.157608	6	34.9135	-10.6764	-2.79988	27.7222	9.99124	b3844, b4117, b2903, b0010, b2933, b1380	ACt2rpp, ARGDC, FADRx, FE3Ri, FLVRx, GLYCL, LDH_D
989	-58.9753	EX_succ_e	7.97592	-7.5	0.157608	6	34.9135	-10.6764	-2.79988	27.7222	9.99124	b3844, b4117, b2903, b0010, b1246, b1380	ACt2rpp, ARGDC, FADRx, FE3Ri, FLVRx, GLYCL, LDH_D
990	-58.9753	EX_succ_e	7.97592	-7.5	0.157608	6	34.9135	-10.6764	-2.79988	27.7222	9.99124	b3844, b4117, b2903, b0010, b1981, b1380	ACt2rpp, ARGDC, FADRx, FE3Ri, FLVRx, GLYCL, LDH_D, SKMt2pp
991	-58.9753	EX_succ_e	7.97592	-7.5	0.157608	6	34.9135	-10.6764	-2.79988	27.7222	9.99124	b3844, b4117, b2903, b0010, b1380, b2257	ACt2rpp, ARGDC, FADRx, FE3Ri, FLVRx, GLYCL, LA4NTpp, LDH_D
992	-58.9753	EX_succ_e	7.97592	-7.5	0.157608	6	34.9135	-10.6764	-2.79988	27.7222	9.99124	b3844, b4117, b2903, b0010, b3571, b1380	AAMYLpp, ACt2rpp, ARGDC, FADRx, FE3Ri, FLVRx, GLYCL, LDH_D
993	-58.9753	EX_succ_e	7.97592	-7.5	0.157608	6	34.9135	-10.6764	-2.79988	27.7222	9.99124	b3844, b4117, b3826, b2903, b0010, b1380	ACt2rpp, ARGDC, FADRx, FE3Ri, FLVRx, GLYCL, LDH_D
994	-58.9753	EX_succ_e	7.97592	-7.5	0.157608	6	34.9135	-10.6764	-2.79988	27.7222	9.99124	b4054, b3844, b4117, b2903, b0010, b1380	ACt2rpp, ARGDC, FADRx, FE3Ri, FLVRx, GLYCL, LDH_D
995	-58.9753	EX_succ_e	7.97592	-7.5	0.157608	6	34.9135	-10.6764	-2.79988	27.7222	9.99124	b3844, b4117, b2903, b1468, b0010, b1380	ACt2rpp, ARGDC, FADRx, FE3Ri, FLVRx, GLYCL, LDH_D
996	-58.9753	EX_succ_e	7.97592	-7.5	0.157608	6	34.9135	-10.6764	-2.79988	27.7222	9.99124	b3844, b4117, b2903, b0010, b4195, b1380	ACt2rpp, ARGDC, ASCBptspp, FADRx, FE3Ri, FLVRx, GLYCL, LDH_D
997	-58.9753	EX_succ_e	7.97592	-7.5	0.157608	6	34.9135	-10.6764	-2.79988	27.7222	9.99124	b3844, b4117, b2903, b0010, b2178, b1380	ACt2rpp, ARGDC, FADRx, FE3Ri, FLVRx, GLYCL, LDH_D
998	-58.9753	EX_succ_e	7.97592	-7.5	0.157608	6	34.9135	-10.6764	-2.79988	27.7222	9.99124	b3844, b4117, b2903, b0010, b1380, b1677	ACt2rpp, ALPATE160pp, ALPATG160pp, ARGDC, FADRx, FE3Ri, FLVRx, GLYCL, LDH_D
999	-58.9753	EX_succ_e	7.97592	-7.5	0.157608	6	34.9135	-10.6764	-2.79988	27.7222	9.99124	b3844, b4117, b2903, b0010, b1380, b4392	ACt2rpp, ARGDC, FADRx, FE3Ri, FLVRx, GLYCL, LDH_D
1000	-58.9753	EX_succ_e	7.97592	-7.5	0.157608	6	34.9135	-10.6764	-2.79988	27.7222	9.99124	b3844, b4117, b2903, b0010, b1380, b0839	ACt2rpp, ARGDC, FADRx, FE3Ri, FLVRx, GLYCL, LDH_D
1001	-58.9753	EX_succ_e	7.97592	-7.5	0.157608	6	34.9135	-10.6764	-2.79988	27.7222	9.99124	b3844, b4117, b2903, b0010, b1125, b1380	ACt2rpp, ARGDC, FADRx, FE3Ri, FLVRx, GLYCL, LDH_D
1002	-58.9753	EX_succ_e	7.97592	-7.5	0.157608	6	34.9135	-10.6764	-2.79988	27.7222	9.99124	b2036, b3844, b4117, b2903, b0010, b1380	ACt2rpp, ARGDC, FADRx, FE3Ri, FLVRx, GLYCL, LDH_D, UDPGALM
1003	-58.9753	EX_succ_e	7.97592	-7.5	0.157608	6	34.9135	-10.6764	-2.79988	27.7222	9.99124	b3844, b4117, b2903, b0010, b0123, b1380	ACt2rpp, ARGDC, CU1Opp, FADRx, FE3Ri, FLVRx, GLYCL, LDH_D
1004	-58.9753	EX_succ_e	7.97592	-7.5	0.157608	6	34.9135	-10.6764	-2.79988	27.7222	9.99124	b3844, b4117, b2903, b0010, b1380, b2154	ACt2rpp, ARGDC, FADRx, FE3Ri, FLVRx, GLYCL, LDH_D
1005	-58.9753	EX_succ_e	7.97592	-7.5	0.157608	6	34.9135	-10.6764	-2.79988	27.7222	9.99124	b3844, b4117, b2903, b0010, b1380, b1661	ACt2rpp, ARGDC, CFAS160E, CFAS160G, CFAS180E, CFAS180G, FADRx, FE3Ri, FLVRx, GLYCL, LDH_D
1006	-58.9753	EX_succ_e	7.97592	-7.5	0.157608	6	34.9135	-10.6764	-2.79988	27.7222	9.99124	b3844, b4117, b2903, b2539, b0010, b1380	ACt2rpp, ARGDC, CINNDO, FADRx, FE3Ri, FLVRx, GLYCL, LDH_D, PPPNDO
1007	-58.9753	EX_succ_e	7.97592	-7.5	0.157608	6	34.9135	-10.6764	-2.79988	27.7222	9.99124	b3844, b4117, b2903, b0010, b1380, b0783	ACt2rpp, ARGDC, CPMPS, FADRx, FE3Ri, FLVRx, GLYCL, LDH_D
1008	-58.9753	EX_succ_e	7.97592	-7.5	0.157608	6	34.9135	-10.6764	-2.79988	27.7222	9.99124	b3844, b4117, b2903, b0010, b1380, b3892	ACt2rpp, ARGDC, FADRx, FE3Ri, FLVRx, GLYCL, LDH_D
1009	-58.9753	EX_succ_e	7.97592	-7.5	0.157608	6	34.9135	-10.6764	-2.79988	27.7222	9.99124	b3844, b4117, b2903, b0010, b2254, b1380	ACt2rpp, ARGDC, FADRx, FE3Ri, FLVRx, GLYCL, LDH_D, UPLA4FNT
1010	-58.9753	EX_succ_e	7.97592	-7.5	0.157608	6	34.9135	-10.6764	-2.79988	27.7222	9.99124	b3844, b4117, b2903, b0010, b1380, b2701	ACt2rpp, ARGDC, FADRx, FE3Ri, FLVRx, GLYCL, LDH_D
1011	-58.9753	EX_succ_e	7.97592	-7.5	0.157608	6	34.9135	-10.6764	-2.79988	27.7222	9.99124	b3844, b4117, b2903, b0010, b0860, b1380	ACt2rpp, ARGDC, FADRx, FE3Ri, FLVRx, GLYCL, LDH_D
1012	-58.9753	EX_succ_e	7.97592	-7.5	0.157608	6	34.9135	-10.6764	-2.79988	27.7222	9.99124	b2716, b3844, b4117, b2904, b0010, b1380	ACt2rpp, ARGDC, FADRx, FE3Ri, FLVRx, GLYCL, LDH_D
1013	-58.9753	EX_succ_e	7.97592	-7.5	0.157608	6	34.9135	-10.6764	-2.79988	27.7222	9.99124	b3844, b4117, b2903, b0010, b1380, b3291	ACt2rpp, ARGDC, FADRx, FE3Ri, FLVRx, GLYCL, LDH_D
1014	-58.9753	EX_succ_e	7.97592	-7.5	0.157608	6	34.9135	-10.6764	-2.79988	27.7222	9.99124	b3844, b4117, b2903, b0010, b1380, b2155	ACt2rpp, ARGDC, FADRx, FE3Ri, FLVRx, GLYCL, LDH_D
1015	-58.9753	EX_succ_e	7.97592	-7.5	0.157608	6	34.9135	-10.6764	-2.79988	27.7222	9.99124	b3844, b4117, b2903, b0010, b1380, b1476	ACt2rpp, ARGDC, FADRx, FE3Ri, FLVRx, GLYCL, LDH_D
1016	-58.9753	EX_succ_e	7.97592	-7.5	0.157608	6	34.9135	-10.6764	-2.79988	27.7222	9.99124	b3844, b4117, b2903, b0010, b3127, b1380	ACt2rpp, ARGDC, FADRx, FE3Ri, FLVRx, GLYCL, LDH_D
1017	-58.9753	EX_succ_e	7.97592	-7.5	0.157608	6	34.9135	-10.6764	-2.79988	27.7222	9.99124	b3844, b4117, b1704, b2903, b0010, b1380	ACt2rpp, ARGDC, FADRx, FE3Ri, FLVRx, GLYCL, LDH_D
1018	-58.9753	EX_succ_e	7.97592	-7.5	0.157608	6	34.9135	-10.6764	-2.79988	27.7222	9.99124	b1190, b3844, b4117, b2903, b0010, b1380	ACt2rpp, ARGDC, FADRx, FE3Ri, FLVRx, GLYCL, LDH_D
1019	-58.9753	EX_succ_e	7.97592	-7.5	0.157608	6	34.9135	-10.6764	-2.79988	27.7222	9.99124	b3844, b4117, b2903, b0010, b1380, b2174	ACt2rpp, ARGDC, COLIPAKpp, FADRx, FE3Ri, FLVRx, GLYCL, LDH_D
1020	-58.9753	EX_succ_e	7.97592	-7.5	0.157608	6	34.9135	-10.6764	-2.79988	27.7222	9.99124	b3844, b4117, b2903, b0010, b2481, b1380	ACt2rpp, ARGDC, FADRx, FE3Ri, FLVRx, GLYCL, LDH_D
1021	-58.9753	EX_succ_e	7.97592	-7.5	0.157608	6	34.9135	-10.6764	-2.79988	27.7222	9.99124	b3844, b4117, b2903, b0010, b3224, b1380	ACNAMt2pp, ACt2rpp, ARGDC, FADRx, FE3Ri, FLVRx, GLYCL, LDH_D
1022	-58.9753	EX_succ_e	7.97592	-7.5	0.157608	6	34.9135	-10.6764	-2.79988	27.7222	9.99124	b3844, b4117, b2903, b0010, b1380, b1341	ACt2rpp, ARGDC, FADRx, FE3Ri, FLVRx, GLYCL, LDH_D
1023	-58.9753	EX_succ_e	7.97592	-7.5	0.157608	6	34.9135	-10.6764	-2.79988	27.7222	9.99124	b3844, b4117, b2903, b0010, b1380, b0355	ACt2rpp, ARGDC, FADRx, FE3Ri, FLVRx, GLYCL, LDH_D
1024	-58.9753	EX_succ_e	7.97592	-7.5	0.157608	6	34.9135	-10.6764	-2.79988	27.7222	9.99124	b3844, b4117, b2903, b0010, b3747, b1380	ACt2rpp, ARGDC, FADRx, FE3Ri, FLVRx, GLYCL, LDH_D
1025	-58.9753	EX_succ_e	7.97592	-7.5	0.157608	6	34.9135	-10.6764	-2.79988	27.7222	9.99124	b3844, b4117, b2903, b0010, b1380, b4136	ACt2rpp, ARGDC, DSBDR, FADRx, FE3Ri, FLVRx, GLYCL, LDH_D, TDSR1, TDSR2
1026	-58.9753	EX_succ_e	7.97592	-7.5	0.157608	6	34.9135	-10.6764	-2.79988	27.7222	9.99124	b3844, b4117, b2903, b0010, b1380, b1619	ACt2rpp, ARGDC, CHOLID, FADRx, FE3Ri, FLVRx, GLYCL, LDH_D
1027	-58.9753	EX_succ_e	7.97592	-7.5	0.157608	6	34.9135	-10.6764	-2.79988	27.7222	9.99124	b3844, b4117, b2903, b0010, b3374, b1380	ACt2rpp, ARGDC, FADRx, FE3Ri, FLVRx, FRULYSK, GLYCL, LDH_D
1028	-58.9753	EX_succ_e	7.97592	-7.5	0.157608	6	34.9135	-10.6764	-2.79988	27.7222	9.99124	b3844, b4117, b2903, b0010, b1380, b2873	ACt2rpp, ARGDC, FADRx, FE3Ri, FLVRx, GLYCL, LDH_D, PHDA
1029	-58.9753	EX_succ_e	7.97592	-7.5	0.157608	6	34.9135	-10.6764	-2.79988	27.7222	9.99124	b3844, b4117, b2904, b2903, b0010, b1380	ACt2rpp, ARGDC, FADRx, FE3Ri, FLVRx, GLYCL, LDH_D
1030	-58.9753	EX_succ_e	7.97592	-7.5	0.157608	6	34.9135	-10.6764	-2.79988	27.7222	9.99124	b3844, b4117, b2903, b0010, b0070, b1380	ACt2rpp, ARGDC, FADRx, FE3Ri, FLVRx, GLYCL, LDH_D
1031	-58.9753	EX_succ_e	7.97592	-7.5	0.157608	6	34.9135	-10.6764	-2.79988	27.7222	9.99124	b3844, b4117, b2903, b0010, b1380, b1485	ACt2rpp, ARGDC, FADRx, FE3Ri, FLVRx, GLYCL, LDH_D
1032	-58.9753	EX_succ_e	7.97592	-7.5	0.157608	6	34.9135	-10.6764	-2.79988	27.7222	9.99124	b3844, b4117, b2903, b0010, b1738, b1380	ACt2rpp, ARGDC, CHTBSptspp, FADRx, FE3Ri, FLVRx, GLYCL, LDH_D
1033	-58.9753	EX_succ_e	7.97592	-7.5	0.157608	6	34.9135	-10.6764	-2.79988	27.7222	9.99124	b2518, b3844, b4117, b2903, b0010, b1380	ACt2rpp, ARGDC, FADRx, FE3Ri, FLVRx, GLYCL, LDH_D
1034	-58.9753	EX_succ_e	7.97592	-7.5	0.157608	6	34.9135	-10.6764	-2.79988	27.7222	9.99124	b3844, b4117, b2903, b0010, b0336, b1380	ACt2rpp, ARGDC, CSNt2pp, FADRx, FE3Ri, FLVRx, GLYCL, LDH_D
1035	-58.9753	EX_succ_e	7.97592	-7.5	0.157608	6	34.9135	-10.6764	-2.79988	27.7222	9.99124	b3844, b4117, b2903, b0010, b1380, b4237	ACt2rpp, ARGDC, FADRx, FE3Ri, FLVRx, GLYCL, LDH_D
1036	-58.9753	EX_succ_e	7.97592	-7.5	0.157608	6	34.9135	-10.6764	-2.79988	27.7222	9.99124	b3844, b4117, b2903, b0010, b1380, b0693	ACt2rpp, ARGDC, FADRx, FE3Ri, FLVRx, GLYCL, LDH_D
1037	-58.9753	EX_succ_e	7.97592	-7.5	0.157608	6	34.9135	-10.6764	-2.79988	27.7222	9.99124	b3844, b4117, b2903, b0010, b1380, b0709	ACt2rpp, ARGDC, FADRx, FE3Ri, FLVRx, GLYCL, LDH_D
1038	-58.9753	EX_succ_e	7.97592	-7.5	0.157608	6	34.9135	-10.6764	-2.79988	27.7222	9.99124	b3844, b4117, b2903, b0010, b1380, b1193	ACt2rpp, ARGDC, FADRx, FE3Ri, FLVRx, GLYCL, LDH_D
1039	-58.9753	EX_succ_e	7.97592	-7.5	0.157608	6	34.9135	-10.6764	-2.79988	27.7222	9.99124	b3844, b4117, b2903, b0010, b0933, b1380	ACt2rpp, ARGDC, ETHSO3abcpp, FADRx, FE3Ri, FLVRx, GLYCL, LDH_D, MSO3abcpp, SULFACabcpp
1040	-58.9753	EX_succ_e	7.97592	-7.5	0.157608	6	34.9135	-10.6764	-2.79988	27.7222	9.99124	b3844, b4117, b2903, b0010, b1380, b1474	ACt2rpp, ARGDC, FADRx, FE3Ri, FLVRx, GLYCL, LDH_D
1041	-58.9753	EX_succ_e	7.97592	-7.5	0.157608	6	34.9135	-10.6764	-2.79988	27.7222	9.99124	b3844, b4117, b2903, b0010, b4194, b1380	ACt2rpp, ARGDC, ASCBptspp, FADRx, FE3Ri, FLVRx, GLYCL, LDH_D
1042	-58.9753	EX_succ_e	7.97592	-7.5	0.157608	6	34.9135	-10.6764	-2.79988	27.7222	9.99124	b3844, b4117, b3744, b2903, b0010, b1380	ACt2rpp, ARGDC, FADRx, FE3Ri, FLVRx, GLYCL, LDH_D
1043	-58.9753	EX_succ_e	7.97592	-7.5	0.157608	6	34.9135	-10.6764	-2.79988	27.7222	9.99124	b3844, b4117, b2903, b0010, b3336, b1380	ACt2rpp, ARGDC, FADRx, FE3Ri, FLVRx, GLYCL, LDH_D
1044	-58.9753	EX_succ_e	7.97592	-7.5	0.157608	6	34.9135	-10.6764	-2.79988	27.7222	9.99124	b3844, b4117, b2903, b2661, b0010, b1380	ACt2rpp, ARGDC, FADRx, FE3Ri, FLVRx, GLYCL, LDH_D
1045	-58.9753	EX_succ_e	7.97592	-7.5	0.157608	6	34.9135	-10.6764	-2.79988	27.7222	9.99124	b3844, b4117, b2905, b2903, b0010, b1380	ACt2rpp, ARGDC, FADRx, FE3Ri, FLVRx, GLYCL, LDH_D
1046	-58.9753	EX_succ_e	7.97592	-7.5	0.157608	6	34.9135	-10.6764	-2.79988	27.7222	9.99124	b3844, b4117, b2903, b0010, b1380, b0805	ACt2rpp, ARGDC, FADRx, FE3Ri, FLVRx, GLYCL, LDH_D
1047	-58.9753	EX_succ_e	7.97592	-7.5	0.157608	6	34.9135	-10.6764	-2.79988	27.7222	9.99124	b3844, b4117, b2903, b0010, b1380, b3253	ACt2rpp, ARGDC, FADRx, FE3Ri, FLVRx, GLYCL, LDH_D, PCNO
1048	-58.9753	EX_succ_e	7.97592	-7.5	0.157608	6	34.9135	-10.6764	-2.79988	27.7222	9.99124	b3844, b4117, b2903, b0010, b0068, b1380	ACt2rpp, ARGDC, FADRx, FE3Ri, FLVRx, GLYCL, LDH_D, THMabcpp
1049	-58.9753	EX_succ_e	7.97592	-7.5	0.157608	6	34.9135	-10.6764	-2.79988	27.7222	9.99124	b3844, b4117, b2903, b0010, b2035, b1380	ACt2rpp, ARGDC, FADRx, FE3Ri, FLVRx, GLYCL, LDH_D, O16AP1pp, O16AP2pp, O16AP3pp
1050	-58.9753	EX_succ_e	7.97592	-7.5	0.157608	6	34.9135	-10.6764	-2.79988	27.7222	9.99124	b0638, b3844, b4117, b2903, b0010, b1380	ACt2rpp, ARGDC, FADRx, FE3Ri, FLVRx, GLYCL, LDH_D, RZ5PP
1051	-58.9753	EX_succ_e	7.97592	-7.5	0.157608	6	34.9135	-10.6764	-2.79988	27.7222	9.99124	b3844, b4117, b2903, b3600, b0010, b1380	ACt2rpp, ARGDC, FADRx, FE3Ri, FLVRx, GLYCL, LDH_D, M1PD
1052	-58.9753	EX_succ_e	7.97592	-7.5	0.157608	6	34.9135	-10.6764	-2.79988	27.7222	9.99124	b3844, b4117, b2903, b2205, b0010, b1380	ACt2rpp, ARGDC, FADRx, FE3Ri, FLVRx, GLYCL, LDH_D, NO3R1bpp
1053	-58.9753	EX_succ_e	7.97592	-7.5	0.157608	6	34.9135	-10.6764	-2.79988	27.7222	9.99124	b2901, b3844, b4117, b2903, b0010, b1380	ACt2rpp, ARGDC, FADRx, FE3Ri, FLVRx, GLYCL, LDH_D
1054	-58.9753	EX_succ_e	7.97592	-7.5	0.157608	6	34.9135	-10.6764	-2.79988	27.7222	9.99124	b3844, b4117, b2903, b0010, b1380, b2033	ACt2rpp, ARGDC, FADRx, FE3Ri, FLVRx, GLYCL, LDH_D, O16AT
1055	-58.9753	EX_succ_e	7.97592	-7.5	0.157608	6	34.9135	-10.6764	-2.79988	27.7222	9.99124	b3844, b3940, b4117, b2903, b0010, b1380	ACt2rpp, ARGDC, FADRx, FE3Ri, FLVRx, GLYCL, LDH_D
1056	-58.9753	EX_succ_e	7.97592	-7.5	0.157608	6	34.9135	-10.6764	-2.79988	27.7222	9.99124	b3844, b4117, b2903, b0010, b1380, b3857	ACt2rpp, ARGDC, BMOGDS1, BMOGDS2, BWCOGDS1, BWCOGDS2, FADRx, FE3Ri, FLVRx, GLYCL, LDH_D, MOGDS
1057	-58.9753	EX_succ_e	7.97592	-7.5	0.157608	6	34.9135	-10.6764	-2.79988	27.7222	9.99124	b3844, b4117, b3908, b2903, b0010, b1380	ACt2rpp, ARGDC, FADRx, FE3Ri, FLVRx, GLYCL, LDH_D
1058	-58.9753	EX_succ_e	7.97592	-7.5	0.157608	6	34.9135	-10.6764	-2.79988	27.7222	9.99124	b3844, b4117, b2903, b0010, b0751, b1380	ACt2rpp, ARGDC, FADRx, FE3Ri, FLVRx, GLYCL, LDH_D, NMNPtpp
1059	-58.9753	EX_succ_e	7.97592	-7.5	0.157608	6	34.9135	-10.6764	-2.79988	27.7222	9.99124	b3844, b4117, b2903, b0010, b1778, b1380	ACt2rpp, ARGDC, FADRx, FE3Ri, FLVRx, GLYCL, LDH_D
1060	-58.9753	EX_succ_e	7.97592	-7.5	0.157608	6	34.9135	-10.6764	-2.79988	27.7222	9.99124	b3844, b4117, b2903, b0010, b1380, b2987	ACt2rpp, ARGDC, FADRx, FE3Ri, FLVRx, GLYCL, LDH_D
1061	-58.9753	EX_succ_e	7.97592	-7.5	0.157608	6	34.9135	-10.6764	-2.79988	27.7222	9.99124	b3844, b4117, b4039, b2903, b0010, b1380	ACt2rpp, ARGDC, FADRx, FE3Ri, FLVRx, GLYCL, LDH_D
1062	-58.9753	EX_succ_e	7.97592	-7.5	0.157608	6	34.9135	-10.6764	-2.79988	27.7222	9.99124	b3844, b4117, b2903, b0010, b1380, b2037	ACt2rpp, ARGDC, FADRx, FE3Ri, FLVRx, GLYCL, LDH_D, O16AUNDtpp
1063	-58.9753	EX_succ_e	7.97592	-7.5	0.157608	6	34.9135	-10.6764	-2.79988	27.7222	9.99124	b3844, b4117, b2903, b0010, b1244, b1380	ACt2rpp, ARGDC, FADRx, FE3Ri, FLVRx, GLYCL, LDH_D
1064	-58.9753	EX_succ_e	7.97592	-7.5	0.157608	6	34.9135	-10.6764	-2.79988	27.7222	9.99124	b3844, b4117, b2903, b0010, b1380, b3880	ACt2rpp, ARGDC, FADRx, FE3Ri, FLVRx, GLYCL, LDH_D, SQVOSI
1065	-58.9753	EX_succ_e	7.97592	-7.5	0.157608	6	34.9135	-10.6764	-2.79988	27.7222	9.99124	b3844, b4117, b2903, b0010, b0092, b1380	ACt2rpp, ARGDC, FADRx, FE3Ri, FLVRx, GLYCL, LDH_D
1066	-58.9753	EX_succ_e	7.97592	-7.5	0.157608	6	34.9135	-10.6764	-2.79988	27.7222	9.99124	b3903, b3844, b4117, b2903, b0010, b1380	ACt2rpp, ARGDC, FADRx, FE3Ri, FLVRx, GLYCL, LDH_D, LYXI, RMI
1067	-58.9753	EX_succ_e	7.97592	-7.5	0.157608	6	34.9135	-10.6764	-2.79988	27.7222	9.99124	b3844, b4117, b2903, b0010, b1380, b2794	ACt2rpp, ARGDC, CDGR, FADRx, FE3Ri, FLVRx, GLYCL, LDH_D
1068	-58.9753	EX_succ_e	7.97592	-7.5	0.157608	6	34.9135	-10.6764	-2.79988	27.7222	9.99124	b3844, b4117, b2903, b0010, b3605, b1380	ACt2rpp, ARGDC, FADRx, FE3Ri, FLVRx, GLYCL, LDH_D
1069	-58.9753	EX_succ_e	7.97592	-7.5	0.157608	6	34.9135	-10.6764	-2.79988	27.7222	9.99124	b3844, b4117, b2903, b0010, b3350, b1380	ACt2rpp, ARGDC, FADRx, FE3Ri, FLVRx, GLYCL, LDH_D
1070	-58.9753	EX_succ_e	7.97592	-7.5	0.157608	6	34.9135	-10.6764	-2.79988	27.7222	9.99124	b3844, b4117, b2903, b0010, b1469, b1380	ACt2rpp, ARGDC, FADRx, FE3Ri, FLVRx, GLYCL, LDH_D
1071	-58.9753	EX_succ_e	7.97592	-7.5	0.157608	6	34.9135	-10.6764	-2.79988	27.7222	9.99124	b3844, b4117, b2903, b0010, b1380, b1185	ACt2rpp, ARGDC, DSBAO1, DSBAO2, FADRx, FE3Ri, FLVRx, GLYCL, LDH_D
1072	-58.9753	EX_succ_e	7.97592	-7.5	0.157608	6	34.9135	-10.6764	-2.79988	27.7222	9.99124	b3844, b4117, b2903, b0010, b1380, b2877	ACt2rpp, ARGDC, FADRx, FE3Ri, FLVRx, GLYCL, LDH_D, MOCDS
1073	-58.9753	EX_succ_e	7.97592	-7.5	0.157608	6	34.9135	-10.6764	-2.79988	27.7222	9.99124	b3844, b2168, b4117, b2903, b0010, b1380	ACt2rpp, ARGDC, FADRx, FE3Ri, FLVRx, FRUK, GLYCL, LDH_D
1074	-58.9753	EX_succ_e	7.97592	-7.5	0.157608	6	34.9135	-10.6764	-2.79988	27.7222	9.99124	b3844, b4117, b2361, b2903, b0010, b1380	ACt2rpp, ARGDC, FADRx, FE3Ri, FLVRx, GLYCL, LDH_D
1075	-58.9753	EX_succ_e	7.97592	-7.5	0.157608	6	34.9135	-10.6764	-2.79988	27.7222	9.99124	b3844, b4117, b2903, b0010, b1380, b4106	ACt2rpp, ARGDC, FADRx, FE3Ri, FLVRx, GLYCL, LDH_D, MEPNabcpp
1076	-58.9753	EX_succ_e	7.97592	-7.5	0.157608	6	34.9135	-10.6764	-2.79988	27.7222	9.99124	b3844, b4117, b2903, b0010, b4464, b1380	ACt2rpp, ARGDC, FADRx, FE3Ri, FLVRx, GLYCL, LDH_D
1077	-58.9753	EX_succ_e	7.97592	-7.5	0.157608	6	34.9135	-10.6764	-2.79988	27.7222	9.99124	b3844, b4117, b2903, b0010, b2719, b1380	ACt2rpp, ARGDC, FADRx, FE3Ri, FLVRx, GLYCL, LDH_D
1078	-58.9753	EX_succ_e	7.97592	-7.5	0.157608	6	34.9135	-10.6764	-2.79988	27.7222	9.99124	b3844, b3713, b4117, b2903, b0010, b1380	ACt2rpp, ARGDC, FADRx, FE3Ri, FLVRx, GLYCL, LDH_D
1079	-58.9753	EX_succ_e	7.97592	-7.5	0.157608	6	34.9135	-10.6764	-2.79988	27.7222	9.99124	b0841, b3844, b4117, b2903, b0010, b1380	ACt2rpp, ARGDC, FADRx, FE3Ri, FLVRx, GLYCL, LDH_D
1080	-58.9753	EX_succ_e	7.97592	-7.5	0.157608	6	34.9135	-10.6764	-2.79988	27.7222	9.99124	b3844, b4117, b2903, b0010, b4193, b1380	ACt2rpp, ARGDC, ASCBptspp, FADRx, FE3Ri, FLVRx, GLYCL, LDH_D
1081	-58.9753	EX_succ_e	7.97592	-7.5	0.157608	6	34.9135	-10.6764	-2.79988	27.7222	9.99124	b3844, b4117, b2903, b0010, b3568, b1380	ACt2rpp, ARGDC, FADRx, FE3Ri, FLVRx, GLYCL, LDH_D, XYLabcpp
1082	-58.9753	EX_succ_e	7.97592	-7.5	0.157608	6	34.9135	-10.6764	-2.79988	27.7222	9.99124	b0903, b3844, b4117, b2903, b0010, b1380	ACt2rpp, ARGDC, FADRx, FE3Ri, FLVRx, GLYCL, LDH_D
1083	-58.9753	EX_succ_e	7.97592	-7.5	0.157608	6	34.9135	-10.6764	-2.79988	27.7222	9.99124	b3844, b4117, b2903, b0010, b1380, b3860	ACt2rpp, ARGDC, DSBAO1, DSBAO2, FADRx, FE3Ri, FLVRx, GLYCL, LDH_D
1084	-58.9753	EX_succ_e	7.97592	-7.5	0.157608	6	34.9135	-10.6764	-2.79988	27.7222	9.99124	b3844, b4117, b2903, b0010, b3823, b1380	ACt2rpp, ARGDC, FADRx, FE3Ri, FLVRx, GLYCL, LDH_D
1085	-58.9753	EX_succ_e	7.97592	-7.5	0.157608	6	34.9135	-10.6764	-2.79988	27.7222	9.99124	b3844, b0428, b4117, b2903, b0010, b1380	ACt2rpp, ARGDC, FADRx, FE3Ri, FLVRx, GLYCL, HEMEOS, LDH_D
1086	-58.9753	EX_succ_e	7.97592	-7.5	0.157608	6	34.9135	-10.6764	-2.79988	27.7222	9.99124	b3844, b4117, b2903, b0010, b1380, b4099	ACt2rpp, ARGDC, ARMEPNS, FADRx, FE3Ri, FLVRx, GLYCL, LDH_D
1087	-58.9753	EX_succ_e	7.97592	-7.5	0.157608	6	34.9135	-10.6764	-2.79988	27.7222	9.99124	b3844, b4117, b2903, b0010, b2146, b1380	ACt2rpp, ARGDC, DURADx, FADRx, FE3Ri, FLVRx, GLYCL, LDH_D
1088	-58.9753	EX_succ_e	7.97592	-7.5	0.157608	6	34.9135	-10.6764	-2.79988	27.7222	9.99124	b3844, b4117, b2903, b0010, b1380, b1490	ACt2rpp, ARGDC, FADRx, FE3Ri, FLVRx, GLYCL, LDH_D
1089	-58.9753	EX_succ_e	7.97592	-7.5	0.157608	6	34.9135	-10.6764	-2.79988	27.7222	9.99124	b3844, b4117, b2903, b0010, b1380, b0604	ACt2rpp, ARGDC, DSBGGT, FADRx, FE3Ri, FLVRx, GLYCL, LDH_D, TDSR2
1090	-58.9753	EX_succ_e	7.97592	-7.5	0.157608	6	34.9135	-10.6764	-2.79988	27.7222	9.99124	b3844, b4117, b2903, b0010, b0867, b1380	ACt2rpp, ARGDC, FADRx, FE3Ri, FLVRx, GLYCL, LDH_D
1091	-58.9753	EX_succ_e	7.97592	-7.5	0.157608	6	34.9135	-10.6764	-2.79988	27.7222	9.99124	b3844, b4117, b2903, b0010, b2720, b1380	ACt2rpp, ARGDC, FADRx, FE3Ri, FLVRx, GLYCL, LDH_D
1092	-58.9753	EX_succ_e	7.97592	-7.5	0.157608	6	34.9135	-10.6764	-2.79988	27.7222	9.99124	b3844, b4117, b2903, b0010, b1380, b1097	ACt2rpp, ARGDC, FADRx, FE3Ri, FLVRx, GLYCL, LDH_D
1093	-58.9753	EX_succ_e	7.97592	-7.5	0.157608	6	34.9135	-10.6764	-2.79988	27.7222	9.99124	b3844, b4192, b4117, b2903, b0010, b1380	ACt2rpp, ARGDC, ASCBPL, FADRx, FE3Ri, FLVRx, GLYCL, LDH_D
1094	-58.9753	EX_succ_e	7.97592	-7.5	0.157608	6	34.9135	-10.6764	-2.79988	27.7222	9.99124	b3844, b4117, b2903, b0010, b4033, b1380	14GLUCANabcpp, ACt2rpp, ARGDC, FADRx, FE3Ri, FLVRx, GLYCL, LDH_D, MALTHXabcpp, MALTPTabcpp, MALTTRabcpp, MALTTTRabcpp, MALTabcpp
1095	-58.9753	EX_succ_e	7.97592	-7.5	0.157608	6	34.9135	-10.6764	-2.79988	27.7222	9.99124	b3844, b4117, b2903, b2215, b0010, b1380	ACt2rpp, ARGDC, FADRx, FE3Ri, FLVRx, GLYCL, LDH_D
1096	-58.9753	EX_succ_e	7.97592	-7.5	0.157608	6	34.9135	-10.6764	-2.79988	27.7222	9.99124	b3844, b4117, b2903, b0010, b4019, b1380	ACt2rpp, ARGDC, FADRx, FE3Ri, FLVRx, GLYCL, LDH_D
1097	-58.9753	EX_succ_e	7.97592	-7.5	0.157608	6	34.9135	-10.6764	-2.79988	27.7222	9.99124	b3844, b4117, b2903, b0010, b1380, b2430	ACt2rpp, ARGDC, FADRx, FE3Ri, FLVRx, GLYCL, LDH_D
1098	-58.9753	EX_succ_e	7.97592	-7.5	0.157608	6	34.9135	-10.6764	-2.79988	27.7222	9.99124	b3844, b4117, b2903, b1466, b0010, b1380	ACt2rpp, ARGDC, FADRx, FE3Ri, FLVRx, GLYCL, LDH_D
1099	-58.9753	EX_succ_e	7.97592	-7.5	0.157608	6	34.9135	-10.6764	-2.79988	27.7222	9.99124	b3844, b4117, b2903, b0010, b1380, b1634	ACt2rpp, ARGDC, FADRx, FE3Ri, FLVRx, GLYCL, LDH_D
1100	-58.9753	EX_succ_e	7.97592	-7.5	0.157608	6	34.9135	-10.6764	-2.79988	27.7222	9.99124	b3844, b2582, b4117, b2903, b0010, b1380	ACt2rpp, ARGDC, FADRx, FE3Ri, FLVRx, GLYCL, LDH_D
1101	-58.9753	EX_succ_e	7.97592	-7.5	0.157608	6	34.9135	-10.6764	-2.79988	27.7222	9.99124	b3844, b4117, b2905, b0010, b3917, b1380	ACt2rpp, ARGDC, FADRx, FE3Ri, FLVRx, GLYCL, LDH_D
1102	-58.9753	EX_succ_e	7.97592	-7.5	0.157608	6	34.9135	-10.6764	-2.79988	27.7222	9.99124	b3844, b4117, b2903, b0010, b1380, b1519	ACONMT, ACt2rpp, ARGDC, FADRx, FE3Ri, FLVRx, GLYCL, LDH_D
1103	-58.9753	EX_succ_e	7.97592	-7.5	0.157608	6	34.9135	-10.6764	-2.79988	27.7222	9.99124	b3844, b4117, b2903, b0010, b1380, b0353	ACt2rpp, ARGDC, FADRx, FE3Ri, FLVRx, GLYCL, HCINNMt2rpp, HPPPNt2rpp, LDH_D
1104	-58.9753	EX_succ_e	7.97592	-7.5	0.157608	6	34.9135	-10.6764	-2.79988	27.7222	9.99124	b3844, b4117, b2903, b0010, b1443, b1380	ACt2rpp, ARGDC, FADRx, FE3Ri, FLVRx, GLYCL, LDH_D
1105	-58.9753	EX_succ_e	7.97592	-7.5	0.157608	6	34.9135	-10.6764	-2.79988	27.7222	9.99124	b3844, b4117, b2903, b0010, b1380, b3877	ACt2rpp, ARGDC, DHPStr, FADRx, FE3Ri, FLVRx, GLYCL, LDH_D
1106	-58.9753	EX_succ_e	7.97592	-7.5	0.157608	6	34.9135	-10.6764	-2.79988	27.7222	9.99124	b3844, b4117, b2903, b0010, b1380, b2302	ACt2rpp, ARGDC, FADRx, FE3Ri, FLVRx, GLYCL, LDH_D
1107	-58.9753	EX_succ_e	7.97592	-7.5	0.157608	6	34.9135	-10.6764	-2.79988	27.7222	9.99124	b3844, b4117, b2903, b0010, b1291, b1380	ACt2rpp, ARGDC, FADRx, FE3Ri, FLVRx, GLYCL, LDH_D
1108	-58.9753	EX_succ_e	7.97592	-7.5	0.157608	6	34.9135	-10.6764	-2.79988	27.7222	9.99124	b3844, b4117, b2903, b0010, b1363, b1380	ACt2rpp, ARGDC, FADRx, FE3Ri, FLVRx, GLYCL, LDH_D
1109	-58.9753	EX_succ_e	7.97592	-7.5	0.157608	6	34.9135	-10.6764	-2.79988	27.7222	9.99124	b3844, b4117, b2903, b0010, b0307, b1380	ACt2rpp, ARGDC, FADRx, FE3Ri, FLVRx, GLYCL, LDH_D
1110	-58.9753	EX_succ_e	7.97592	-7.5	0.157608	6	34.9135	-10.6764	-2.79988	27.7222	9.99124	b3844, b4117, b2903, b0010, b2489, b1380	ACt2rpp, ARGDC, FADRx, FE3Ri, FLVRx, GLYCL, LDH_D
1111	-58.9753	EX_succ_e	7.97592	-7.5	0.157608	6	34.9135	-10.6764	-2.79988	27.7222	9.99124	b3844, b4117, b2903, b0010, b4213, b1380	23PDE2pp, 23PDE4pp, 23PDE7pp, 23PDE9pp, ACt2rpp, ARGDC, FADRx, FE3Ri, FLVRx, GLYCL, LDH_D
1112	-58.9753	EX_succ_e	7.97592	-7.5	0.157608	6	34.9135	-10.6764	-2.79988	27.7222	9.99124	b3844, b4117, b2903, b0010, b0237, b1380	ACt2rpp, ARGDC, FADRx, FE3Ri, FLVRx, GLYCL, LALGP, LDH_D
1113	-58.9753	EX_succ_e	7.97592	-7.5	0.157608	6	34.9135	-10.6764	-2.79988	27.7222	9.99124	b3844, b4117, b2903, b0010, b1325, b1380	ACt2rpp, ALAGLUE, ARGDC, FADRx, FE3Ri, FLVRx, GLYCL, LDH_D
1114	-58.9753	EX_succ_e	7.97592	-7.5	0.157608	6	34.9135	-10.6764	-2.79988	27.7222	9.99124	b3844, b4117, b2905, b0010, b0653, b1380	ACt2rpp, ARGDC, ASPabcpp, FADRx, FE3Ri, FLVRx, GLUabcpp, GLYCL, LDH_D
1115	-58.9753	EX_succ_e	7.97592	-7.5	0.157608	6	34.9135	-10.6764	-2.79988	27.7222	9.99124	b3844, b4117, b2903, b0010, b0652, b1380	ACt2rpp, ARGDC, ASPabcpp, FADRx, FE3Ri, FLVRx, GLUabcpp, GLYCL, LDH_D
1116	-58.9753	EX_succ_e	7.97592	-7.5	0.157608	6	34.9135	-10.6764	-2.79988	27.7222	9.99124	b3844, b4117, b2903, b0010, b1380, b3543	ACt2rpp, ARGDC, CGLYabcpp, FADRx, FE3Ri, FLVRx, GLYCL, LDH_D, PROGLYabcpp
1117	-58.9753	EX_succ_e	7.97592	-7.5	0.157608	6	34.9135	-10.6764	-2.79988	27.7222	9.99124	b3844, b4117, b2903, b0010, b1380, b3540	ACt2rpp, ARGDC, CGLYabcpp, FADRx, FE3Ri, FLVRx, GLYCL, LDH_D, PROGLYabcpp
1118	-58.9753	EX_succ_e	7.97592	-7.5	0.157608	6	34.9135	-10.6764	-2.79988	27.7222	9.99124	b3844, b4117, b2903, b0010, b2841, b1380	ACt2rpp, ARBt2rpp, ARGDC, FADRx, FE3Ri, FLVRx, GLYCL, LDH_D
1119	-58.9753	EX_succ_e	7.97592	-7.5	0.157608	6	34.9135	-10.6764	-2.79988	27.7222	9.99124	b3844, b4117, b2903, b0010, b2679, b1380	ACt2rpp, ARGDC, CRNDabcpp, CRNabcpp, CTBTabcpp, FADRx, FE3Ri, FLVRx, GLYCL, LDH_D, PROabcpp
1120	-58.9753	EX_succ_e	7.97592	-7.5	0.157608	6	34.9135	-10.6764	-2.79988	27.7222	9.99124	b3844, b4117, b2903, b0010, b0591, b1380	ACt2rpp, ARGDC, FADRx, FE3Ri, FEENTERtpp, FLVRx, GLYCL, LDH_D
1121	-58.9753	EX_succ_e	7.97592	-7.5	0.157608	6	34.9135	-10.6764	-2.79988	27.7222	9.99124	b3844, b4117, b1746, b2903, b0010, b1380	ACt2rpp, ARGDC, FADRx, FE3Ri, FLVRx, GLYCL, LDH_D, SGSAD
1122	-58.9753	EX_succ_e	7.97592	-7.5	0.157608	6	34.9135	-10.6764	-2.79988	27.7222	9.99124	b3844, b4117, b2903, b0010, b1380, b3447	ACt2rpp, ARGDC, FADRx, FE3Ri, FLVRx, GLYCL, GTHRDHpp, LDH_D
1123	-58.9753	EX_succ_e	7.97592	-7.5	0.157608	6	34.9135	-10.6764	-2.79988	27.7222	9.99124	b3844, b4117, b2903, b0010, b1967, b1380	ACt2rpp, ARGDC, FADRx, FE3Ri, FLVRx, GLYCL, GLYOX3, LDH_D
1124	-58.9753	EX_succ_e	7.97592	-7.5	0.157608	6	34.9135	-10.6764	-2.79988	27.7222	9.99124	b3844, b4117, b2143, b2903, b0010, b1380	ACt2rpp, ARGDC, CYTD, DCYTD, FADRx, FE3Ri, FLVRx, GLYCL, LDH_D
1125	-58.9753	EX_succ_e	7.97592	-7.5	0.157608	6	34.9135	-10.6764	-2.79988	27.7222	9.99124	b3844, b4117, b0403, b2903, b0010, b1380	ACt2rpp, ARGDC, FADRx, FE3Ri, FLVRx, GLYCL, LDH_D, MLTG1, MLTG2, MLTG3, MLTG4, MLTG5
1126	-58.9753	EX_succ_e	7.97592	-7.5	0.157608	6	34.9135	-10.6764	-2.79988	27.7222	9.99124	b3844, b4117, b2903, b0010, b1380, b0508	ACt2rpp, ARGDC, FADRx, FE3Ri, FLVRx, GLYCL, HPYRI, LDH_D
1127	-58.9753	EX_succ_e	7.97592	-7.5	0.157608	6	34.9135	-10.6764	-2.79988	27.7222	9.99124	b3831, b3844, b4117, b2903, b0010, b1380	ACt2rpp, ARGDC, FADRx, FE3Ri, FLVRx, GLYCL, LDH_D, PYNP2r
1128	-58.9753	EX_succ_e	7.97592	-7.5	0.157608	6	34.9135	-10.6764	-2.79988	27.7222	9.99124	b3844, b4117, b2903, b0010, b1380, b1600	ACt2rpp, ARGDC, FADRx, FE3Ri, FLVRx, GLYCL, LDH_D, SPMDt3pp
1129	-58.9753	EX_succ_e	7.97592	-7.5	0.157608	6	34.9135	-10.6764	-2.79988	27.7222	9.99124	b3844, b4117, b2903, b0010, b1380, b1599	ACt2rpp, ARGDC, FADRx, FE3Ri, FLVRx, GLYCL, LDH_D, SPMDt3pp
1130	-58.9753	EX_succ_e	7.97592	-7.5	0.157608	6	34.9135	-10.6764	-2.79988	27.7222	9.99124	b3844, b4117, b2903, b0010, b1380, b4238	ACt2rpp, ARGDC, FADRx, FE3Ri, FLVRx, GLYCL, LDH_D, RNTR1c2, RNTR2c2, RNTR3c2, RNTR4c2
1131	-58.9753	EX_succ_e	7.97592	-7.5	0.157608	6	34.9135	-10.6764	-2.79988	27.7222	9.99124	b3844, b4117, b2903, b0010, b1380, b3070	ACt2rpp, ARGDC, FADRx, FE3DCITR5, FE3DHBZS3R, FE3Ri, FEENTERR4, FLVRx, GLYCL, LDH_D
1132	-58.9753	EX_succ_e	7.97592	-7.5	0.157608	6	34.9135	-10.6764	-2.79988	27.7222	9.99124	b3844, b4117, b2903, b0010, b1380, b1009	3AMACHYD, ACt2rpp, ARGDC, FADRx, FE3Ri, FLVRx, GLYCL, LDH_D
1133	-58.9753	EX_succ_e	7.97592	-7.5	0.157608	6	34.9135	-10.6764	-2.79988	27.7222	9.99124	b3844, b4117, b2903, b0010, b1380, b0831	ACt2rpp, ARGDC, FADRx, FE3Ri, FLVRx, GLYCL, GTHRDabcpp, LDH_D
1134	-58.9753	EX_succ_e	7.97592	-7.5	0.157608	6	34.9135	-10.6764	-2.79988	27.7222	9.99124	b0072, b3844, b4117, b2903, b0010, b1380	ACt2rpp, ARGDC, FADRx, FE3Ri, FLVRx, GLYCL, IPPMIa, IPPMIb, LDH_D
1135	-58.9753	EX_succ_e	7.97592	-7.5	0.157608	6	34.9135	-10.6764	-2.79988	27.7222	9.99124	b3844, b4117, b2903, b3939, b0010, b1380	ACt2rpp, ARGDC, FADRx, FE3Ri, FLVRx, GLYCL, LDH_D, SHSL1
1136	-58.9753	EX_succ_e	7.97592	-7.5	0.157608	6	34.9135	-10.6764	-2.79988	27.7222	9.99124	b3844, b4117, b2903, b0010, b3654, b1380	ACt2rpp, ARGDC, FADRx, FE3Ri, FLVRx, GLYCL, GUAt2pp, LDH_D
1137	-58.9753	EX_succ_e	7.97592	-7.5	0.157608	6	34.9135	-10.6764	-2.79988	27.7222	9.99124	b3844, b4117, b2903, b0010, b0152, b1380	ACt2rpp, ARBTNabcpp, ARGDC, CPGNabcpp, FADRx, FE3HOXabcpp, FE3Ri, FECRMabcpp, FEOXAMabcpp, FLVRx, GLYCL, LDH_D
1138	-58.9753	EX_succ_e	7.97592	-7.5	0.157608	6	34.9135	-10.6764	-2.79988	27.7222	9.99124	b3844, b4117, b2903, b0010, b3915, b1380	ACt2rpp, ARGDC, FADRx, FE2t3pp, FE3Ri, FLVRx, GLYCL, HG2t3pp, LDH_D
1139	-58.9753	EX_succ_e	7.97592	-7.5	0.157608	6	34.9135	-10.6764	-2.79988	27.7222	9.99124	b1398, b3844, b4117, b2903, b0010, b1380	ACt2rpp, ARGDC, FADRx, FE3Ri, FLVRx, GLYCL, LDH_D, PACCOAL
1140	-58.9753	EX_succ_e	7.97592	-7.5	0.157608	6	34.9135	-10.6764	-2.79988	27.7222	9.99124	b3752, b3844, b4117, b2903, b0010, b1380	ACt2rpp, ARGDC, FADRx, FE3Ri, FLVRx, GLYCL, LDH_D, RBK
1141	-58.9753	EX_succ_e	7.97592	-7.5	0.157608	6	34.9135	-10.6764	-2.79988	27.7222	9.99124	b3844, b4117, b2903, b2020, b0010, b1380	ACt2rpp, ARGDC, FADRx, FE3Ri, FLVRx, GLYCL, HISTD, LDH_D
1142	-58.9753	EX_succ_e	7.97592	-7.5	0.157608	6	34.9135	-10.6764	-2.79988	27.7222	9.99124	b2024, b3844, b4117, b2903, b0010, b1380	ACt2rpp, ARGDC, FADRx, FE3Ri, FLVRx, GLYCL, LDH_D, PRMICI
1143	-58.9753	EX_succ_e	7.97592	-7.5	0.157608	6	34.9135	-10.6764	-2.79988	27.7222	9.99124	b3844, b4117, b2903, b1897, b0010, b1380	ACt2rpp, ARGDC, FADRx, FE3Ri, FLVRx, GLYCL, LDH_D, TRE6PP
1144	-58.9753	EX_succ_e	7.97592	-7.5	0.157608	6	34.9135	-10.6764	-2.79988	27.7222	9.99124	b3844, b4117, b2903, b0010, b1380, b1683	ACt2rpp, ARGDC, FADRx, FE3Ri, FLVRx, GLYCL, LDH_D, S2FE2SR, S2FE2SS, S2FE2SS2, S2FE2ST, S4FE4SR, S4FE4ST
1145	-58.9753	EX_succ_e	7.97592	-7.5	0.157608	6	34.9135	-10.6764	-2.79988	27.7222	9.99124	b3844, b4117, b2903, b0010, b1380, b1681	ACt2rpp, ARGDC, FADRx, FE3Ri, FLVRx, GLYCL, LDH_D, S2FE2SR, S2FE2SS, S2FE2SS2, S2FE2ST, S4FE4SR, S4FE4ST
1146	-58.9753	EX_succ_e	7.97592	-7.5	0.157608	6	34.9135	-10.6764	-2.79988	27.7222	9.99124	b2407, b3844, b4117, b2903, b0010, b1380	ACt2rpp, ARGDC, FADRx, FE3Ri, FLVRx, GLYCL, LDH_D, PUNP7
1147	-58.9753	EX_succ_e	7.97592	-7.5	0.157608	6	34.9135	-10.6764	-2.79988	27.7222	9.99124	b3844, b4117, b2903, b0010, b1380, b4020	ACt2rpp, ARGDC, FADRx, FE3Ri, FLVRx, GLYCL, LDH_D, PItpp
1148	-58.9753	EX_succ_e	7.97592	-7.5	0.157608	6	34.9135	-10.6764	-2.79988	27.7222	9.99124	b3844, b4117, b2903, b0010, b2200, b1380	ACt2rpp, ARGDC, FADRx, FE3Ri, FLVRx, GLYCL, LDH_D, PHEMEabcpp
1149	-58.9753	EX_succ_e	7.97592	-7.5	0.157608	6	34.9135	-10.6764	-2.79988	27.7222	9.99124	b3844, b4117, b2903, b0010, b2197, b1380	ACt2rpp, ARGDC, FADRx, FE3Ri, FLVRx, GLYCL, LDH_D, PHEMEabcpp
1150	-58.9753	EX_succ_e	7.97592	-7.5	0.157608	6	34.9135	-10.6764	-2.79988	27.7222	9.99124	b3844, b4117, b2903, b0010, b3213, b1380	ACt2rpp, ARGDC, FADRx, FE3Ri, FLVRx, GLUSy, GLYCL, LDH_D
1151	-58.9753	EX_succ_e	7.97592	-7.5	0.157608	6	34.9135	-10.6764	-2.79988	27.7222	9.99124	b3844, b4117, b1525, b2903, b0010, b1380	ACt2rpp, ARGDC, FADRx, FE3Ri, FLVRx, GLYCL, LDH_D, SSALx
1152	-58.9753	EX_succ_e	7.97592	-7.5	0.157608	6	34.9135	-10.6764	-2.79988	27.7222	9.99124	b3844, b0888, b4117, b2903, b0010, b1380	ACt2rpp, ARGDC, FADRx, FE3Ri, FLVRx, GLYCL, LDH_D, TRDR
1153	-58.9753	EX_succ_e	7.97592	-7.5	0.157608	6	34.9135	-10.6764	-2.79988	27.7222	9.99124	b3844, b4117, b3619, b2903, b0010, b1380	ACt2rpp, AGMHE, ARGDC, FADRx, FE3Ri, FLVRx, GLYCL, LDH_D
1154	-58.9753	EX_succ_e	7.97592	-7.5	0.157608	6	34.9135	-10.6764	-2.79988	27.7222	9.99124	b3784, b3844, b4117, b2903, b0010, b1380	ACGAMT, ACt2rpp, ARGDC, FADRx, FE3Ri, FLVRx, GLYCL, LDH_D
1155	-58.9753	EX_succ_e	7.97592	-7.5	0.157608	6	34.9135	-10.6764	-2.79988	27.7222	9.99124	b4481, b3844, b4117, b2903, b0010, b1380	AADDGT, ACt2rpp, ARGDC, FADRx, FE3Ri, FLVRx, GLYCL, LDH_D
1156	-58.9753	EX_succ_e	7.97592	-7.5	0.157608	6	34.9135	-10.6764	-2.79988	27.7222	9.99124	b3844, b4117, b3787, b2903, b0010, b1380	ACt2rpp, ARGDC, FADRx, FE3Ri, FLVRx, GLYCL, LDH_D, UACMAMO
1157	-58.9753	EX_succ_e	7.97592	-7.5	0.157608	6	34.9135	-10.6764	-2.79988	27.7222	9.99124	b3844, b4117, b2903, b0010, b3621, b1380	ACt2rpp, ARGDC, FADRx, FE3Ri, FLVRx, GLYCL, HEPT1, LDH_D
1158	-58.9753	EX_succ_e	7.97592	-7.5	0.157608	6	34.9135	-10.6764	-2.79988	27.7222	9.99124	b3052, b3844, b4117, b2903, b0010, b1380	ACt2rpp, ARGDC, FADRx, FE3Ri, FLVRx, GLYCL, GMHEPAT, GMHEPK, LDH_D
1159	-58.9753	EX_succ_e	7.97592	-7.5	0.157608	6	34.9135	-10.6764	-2.79988	27.7222	9.99124	b3844, b4117, b2903, b0010, b3627, b1380	ACt2rpp, ARGDC, FADRx, FE3Ri, FLVRx, GLCTR2, GLYCL, LDH_D
1160	-58.9753	EX_succ_e	7.97592	-7.5	0.157608	6	34.9135	-10.6764	-2.79988	27.7222	9.99124	b2038, b3844, b4117, b2903, b0010, b1380	ACt2rpp, ARGDC, FADRx, FE3Ri, FLVRx, GLYCL, LDH_D, TDPDRE
1161	-58.9753	EX_succ_e	7.97592	-7.5	0.157608	6	34.9135	-10.6764	-2.79988	27.7222	9.99124	b3844, b4117, b3806, b2903, b0010, b1380	ACt2rpp, ADNCYC, ARGDC, FADRx, FE3Ri, FLVRx, GLYCL, LDH_D
1162	-58.9753	EX_succ_e	7.97592	-7.5	0.157608	6	34.9135	-10.6764	-2.79988	27.7222	9.99124	b3844, b4117, b2903, b0010, b4290, b1380	ACt2rpp, ARGDC, FADRx, FE3DCITabcpp, FE3Ri, FLVRx, GLYCL, LDH_D
1163	-58.9753	EX_succ_e	7.97592	-7.5	0.157608	6	34.9135	-10.6764	-2.79988	27.7222	9.99124	b3844, b4117, b2903, b0010, b4291, b1380	ACt2rpp, ARGDC, FADRx, FE3DCITtonex, FE3Ri, FLVRx, GLYCL, LDH_D
1164	-58.9753	EX_succ_e	7.97592	-7.5	0.157608	6	34.9135	-10.6764	-2.79988	27.7222	9.99124	b3844, b4117, b2903, b0010, b0433, b1380	ACt2rpp, AGM3Pt2pp, AGM4Pt2pp, AGMt2pp, ARGDC, FADRx, FE3Ri, FLVRx, GLYCL, LDH_D
1165	-58.9753	EX_succ_e	7.97592	-7.5	0.157608	6	34.9135	-10.6764	-2.79988	27.7222	9.99124	b3844, b4117, b2903, b0010, b1107, b1380	ACt2rpp, AGM3PH, AGM4PH, AGMH, ARGDC, FADRx, FE3Ri, FLVRx, GLYCL, LDH_D
1166	-58.9753	EX_succ_e	7.97592	-7.5	0.157608	6	34.9135	-10.6764	-2.79988	27.7222	9.99124	b3844, b2428, b4117, b2903, b0010, b1380	ACM6PH, ACt2rpp, ARGDC, FADRx, FE3Ri, FLVRx, GLYCL, LDH_D
1167	-58.9753	EX_succ_e	7.97592	-7.5	0.157608	6	34.9135	-10.6764	-2.79988	27.7222	9.99124	b3844, b4117, b2440, b2903, b0010, b1380	ACt2rpp, ARGDC, ETHAAL, FADRx, FE3Ri, FLVRx, GLYCL, LDH_D
1168	-58.9753	EX_succ_e	7.97592	-7.5	0.157608	6	34.9135	-10.6764	-2.79988	27.7222	9.99124	b3844, b4117, b2903, b0010, b1380, b1601	ACt2rpp, AI2tpp, ARGDC, FADRx, FE3Ri, FLVRx, GLYCL, LDH_D
1169	-58.9753	EX_succ_e	7.97592	-7.5	0.157608	6	34.9135	-10.6764	-2.79988	27.7222	9.99124	b3844, b2937, b4117, b2903, b0010, b1380	ACt2rpp, AGMT, ARGDC, FADRx, FE3Ri, FLVRx, GLYCL, LDH_D
1170	-58.9753	EX_succ_e	7.97592	-7.5	0.157608	6	34.9135	-10.6764	-2.79988	27.7222	9.99124	b3844, b4117, b2903, b2799, b0010, b1380	ACt2rpp, ARGDC, FADRx, FE3Ri, FLVRx, GLYCL, LCARS, LDH_D
1171	-58.9753	EX_succ_e	7.97592	-7.5	0.157608	6	34.9135	-10.6764	-2.79988	27.7222	9.99124	b3844, b4117, b2903, b0010, b2406, b1380	ACt2rpp, ADNt2pp_copy2, ARGDC, CYTDt2pp_copy2, FADRx, FE3Ri, FLVRx, GLYCL, LDH_D, THMDt2pp_copy2, URIt2pp_copy2, XTSNt2rpp
1172	-58.9753	EX_succ_e	7.97592	-7.5	0.157608	6	34.9135	-10.6764	-2.79988	27.7222	9.99124	b3844, b4117, b2903, b0010, b3457, b1380	ACt2rpp, ALAabcpp, ARGDC, FADRx, FE3Ri, FLVRx, GLYCL, ILEabcpp, LDH_D, LEUabcpp, THRabcpp, VALabcpp
1173	-58.9753	EX_succ_e	7.97592	-7.5	0.157608	6	34.9135	-10.6764	-2.79988	27.7222	9.99124	b3844, b4117, b2903, b0010, b3455, b1380	ACt2rpp, ALAabcpp, ARGDC, FADRx, FE3Ri, FLVRx, GLYCL, ILEabcpp, LDH_D, LEUabcpp, THRabcpp, VALabcpp
1174	-58.9753	EX_succ_e	7.97592	-7.5	0.157608	6	34.9135	-10.6764	-2.79988	27.7222	9.99124	b3844, b4117, b2903, b0010, b0040, b1380	ACt2rpp, ARGDC, CRNt7pp, CRNt8pp, FADRx, FE3Ri, FLVRx, GLYCL, LDH_D
1175	-58.9753	EX_succ_e	7.97592	-7.5	0.157608	6	34.9135	-10.6764	-2.79988	27.7222	9.99124	b0238, b3844, b4117, b2903, b0010, b1380	ACt2rpp, ARGDC, FADRx, FE3Ri, FLVRx, GLYCL, LDH_D, XPPT
1176	-58.9753	EX_succ_e	7.97592	-7.5	0.157608	6	34.9135	-10.6764	-2.79988	27.7222	9.99124	b3844, b3417, b4117, b2903, b0010, b1380	ACt2rpp, ARGDC, FADRx, FE3Ri, FLVRx, GLYCL, LDH_D, MLTP1, MLTP2, MLTP3
1177	-58.9753	EX_succ_e	7.97592	-7.5	0.157608	6	34.9135	-10.6764	-2.79988	27.7222	9.99124	b3844, b4117, b2903, b0010, b1380, b0325	ACt2rpp, ARGDC, FADRx, FE3Ri, FLVRx, GLYCL, LCARSyi, LDH_D, PPDOy
1178	-58.9753	EX_succ_e	7.97592	-7.5	0.157608	6	34.9135	-10.6764	-2.79988	27.7222	9.99124	b3844, b4117, b2903, b0010, b1015, b1380	ACt2rpp, ARGDC, FADRx, FE3Ri, FLVRx, GLYCL, LDH_D, PPAt4pp, PROt4pp
1179	-58.9753	EX_succ_e	7.97592	-7.5	0.157608	6	34.9135	-10.6764	-2.79988	27.7222	9.99124	b3844, b4117, b2903, b0010, b1380, b0605	ACt2rpp, ARGDC, FADRx, FE3Ri, FLVRx, GLYCL, LDH_D, NADHPO
1180	-58.9753	EX_succ_e	7.97592	-7.5	0.157608	6	34.9135	-10.6764	-2.79988	27.7222	9.99124	b3844, b4117, b2903, b0010, b2132, b1380	ACt2rpp, ARGDC, FADRx, FE3Ri, FLVRx, GLYCL, LACZpp, LDH_D
1181	-58.9753	EX_succ_e	7.97592	-7.5	0.157608	6	34.9135	-10.6764	-2.79988	27.7222	9.99124	b3844, b4117, b2903, b0010, b1298, b1380	ACt2rpp, ARGDC, FADRx, FE3Ri, FLVRx, GGGABAH, GLYCL, LDH_D
1182	-58.9753	EX_succ_e	7.97592	-7.5	0.157608	6	34.9135	-10.6764	-2.79988	27.7222	9.99124	b3844, b4117, b2903, b0010, b3779, b1380	ACt2rpp, ARGDC, FADRx, FE3Ri, FLVRx, GLYCL, GTPDPDP, LDH_D
1183	-58.9753	EX_succ_e	7.97592	-7.5	0.157608	6	34.9135	-10.6764	-2.79988	27.7222	9.99124	b3844, b4117, b2903, b0010, b1380, b4208	ACt2rpp, ARGDC, BALAt2pp, DALAt2pp, DSERt2pp, FADRx, FE3Ri, FLVRx, GLYCL, LDH_D
1184	-58.9753	EX_succ_e	7.97592	-7.5	0.157608	6	34.9135	-10.6764	-2.79988	27.7222	9.99124	b3844, b4117, b2903, b0010, b2663, b1380	ABUTt2pp, ACt2rpp, ARGDC, FADRx, FE3Ri, FLVRx, GLYCL, LDH_D
1185	-58.9753	EX_succ_e	7.97592	-7.5	0.157608	6	34.9135	-10.6764	-2.79988	27.7222	9.99124	b3844, b4117, b2903, b0010, b1380, b2917	ACt2rpp, ARGDC, FADRx, FE3Ri, FLVRx, GLYCL, LDH_D, MMM
1186	-58.9753	EX_succ_e	7.97592	-7.5	0.157608	6	34.9135	-10.6764	-2.79988	27.7222	9.99124	b3844, b4117, b2903, b0010, b0979, b1380	ACt2rpp, ARGDC, CYTBD2pp, FADRx, FE3Ri, FLVRx, GLYCL, LDH_D
1187	-58.9753	EX_succ_e	7.97592	-7.5	0.157608	6	34.9135	-10.6764	-2.79988	27.7222	9.99124	b3844, b4117, b2903, b0010, b1380, b4129	ACt2rpp, AP4AS, ARGDC, FADRx, FE3Ri, FLVRx, GLYCL, LDH_D
1188	-58.9753	EX_succ_e	7.97592	-7.5	0.157608	6	34.9135	-10.6764	-2.79988	27.7222	9.99124	b4069, b3844, b4117, b2903, b0010, b1380	ACS, ACt2rpp, ARGDC, FADRx, FE3Ri, FLVRx, GLYCL, LDH_D
1189	-58.9753	EX_succ_e	7.97592	-7.5	0.157608	6	34.9135	-10.6764	-2.79988	27.7222	9.99124	b3844, b4117, b2903, b0010, b1380, b0662	ACt2rpp, ARGDC, FADRx, FE3Ri, FLVRx, GLYCL, LDH_D, OMMBLHXy
1190	-58.9753	EX_succ_e	7.97592	-7.5	0.157608	6	34.9135	-10.6764	-2.79988	27.7222	9.99124	b3844, b4117, b0674, b2903, b0010, b1380	ACt2rpp, ARGDC, ASNS1, FADRx, FE3Ri, FLVRx, GLYCL, LDH_D
1191	-58.9753	EX_succ_e	7.97592	-7.5	0.157608	6	34.9135	-10.6764	-2.79988	27.7222	9.99124	b3844, b4117, b2903, b0010, b1380, b0429	ACt2rpp, ARGDC, CYTBO3_4pp, FADRx, FE3Ri, FLVRx, GLYCL, LDH_D
1192	-58.9753	EX_succ_e	7.97592	-7.5	0.157608	6	34.9135	-10.6764	-2.79988	27.7222	9.99124	b3844, b4117, b2903, b0010, b1380, b0430	ACt2rpp, ARGDC, CYTBO3_4pp, FADRx, FE3Ri, FLVRx, GLYCL, LDH_D
1193	-58.9753	EX_succ_e	7.97592	-7.5	0.157608	6	34.9135	-10.6764	-2.79988	27.7222	9.99124	b3844, b4117, b2903, b4388, b0010, b1380	ACt2rpp, ARGDC, FADRx, FE3Ri, FLVRx, GLYCL, LDH_D, PSP_L
1194	-58.9753	EX_succ_e	7.97592	-7.5	0.157608	6	34.9135	-10.6764	-2.79988	27.7222	9.99124	b3844, b4117, b2903, b0505, b0010, b1380	ACt2rpp, ARGDC, FADRx, FE3Ri, FLVRx, GLYCL, LDH_D, UGLYCH
1195	-58.9753	EX_succ_e	7.97592	-7.5	0.157608	6	34.9135	-10.6764	-2.79988	27.7222	9.99124	b3844, b4117, b2903, b0010, b0019, b1380	ACt2rpp, ARGDC, FADRx, FE3Ri, FLVRx, GLYCL, LDH_D, NAt3_2pp
1196	-58.9753	EX_succ_e	7.97592	-7.5	0.157608	6	34.9135	-10.6764	-2.79988	27.7222	9.99124	b3844, b4117, b2903, b0010, b2128, b1380	ACt2rpp, ARGDC, CHLabcpp, FADRx, FE3Ri, FLVRx, GLYCL, LDH_D
1197	-58.9753	EX_succ_e	7.97592	-7.5	0.157608	6	34.9135	-10.6764	-2.79988	27.7222	9.99124	b3844, b4117, b2903, b0010, b1380, b4167	ACt2rpp, ARGDC, FADRx, FE3Ri, FLVRx, GLYCL, LDH_D, NADHXD, NADHXE, NADPHXD, NADPHXE
1198	-58.9753	EX_succ_e	7.97592	-7.5	0.157608	6	34.9135	-10.6764	-2.79988	27.7222	9.99124	b3844, b4117, b2903, b0010, b2150, b1380	ACt2rpp, ARGDC, FADRx, FE3Ri, FLVRx, GLCabcpp, GLYCL, LDH_D
1199	-58.9753	EX_succ_e	7.97592	-7.5	0.157608	6	34.9135	-10.6764	-2.79988	27.7222	9.99124	b3844, b4117, b2903, b0010, b2148, b1380	ACt2rpp, ARGDC, FADRx, FE3Ri, FLVRx, GLCabcpp, GLYCL, LDH_D
1200	-58.9753	EX_succ_e	7.97592	-7.5	0.157608	6	34.9135	-10.6764	-2.79988	27.7222	9.99124	b3844, b4117, b2903, b3528, b0010, b1380	ACt2rpp, ARGDC, ASPt2_2pp, FADRx, FE3Ri, FLVRx, FUMt2_2pp, GLYCL, LDH_D, MALDt2_2pp, MALt2_2pp, OROTt2_2pp, SUCCt2_2pp
1201	-58.9753	EX_succ_e	7.97592	-7.5	0.157608	6	34.9135	-10.6764	-2.79988	27.7222	9.99124	b3844, b4117, b0032, b2903, b0010, b1380	ACt2rpp, ARGDC, CBPS, FADRx, FE3Ri, FLVRx, GLYCL, LDH_D
1202	-58.9753	EX_succ_e	7.97592	-7.5	0.157608	6	34.9135	-10.6764	-2.79988	27.7222	9.99124	b3844, b4117, b2903, b0010, b1380, b1488	ACt2rpp, ALAALAD, ARGDC, FADRx, FE3Ri, FLVRx, GLYCL, LDH_D
1203	-58.9753	EX_succ_e	7.97592	-7.5	0.157608	6	34.9135	-10.6764	-2.79988	27.7222	9.99124	b3916, b3844, b4117, b2903, b0010, b1380	ACt2rpp, ARGDC, FADRx, FE3Ri, FLVRx, GLYCL, LDH_D, PFK_2, PFK_3
1204	-58.9753	EX_succ_e	7.97592	-7.5	0.157608	6	34.9135	-10.6764	-2.79988	27.7222	9.99124	b3844, b4117, b2903, b0010, b2964, b1380	ACt2rpp, ARGDC, DGSNt2pp, DINSt2pp, FADRx, FE3Ri, FLVRx, GLYCL, GSNt2pp, LDH_D
1205	-58.9753	EX_succ_e	7.97592	-7.5	0.157608	6	34.9135	-10.6764	-2.79988	27.7222	9.99124	b3844, b4117, b0242, b2903, b0010, b1380	ACt2rpp, ARGDC, FADRx, FE3Ri, FLVRx, GLU5K, GLYCL, LDH_D
1206	-58.9753	EX_succ_e	7.97592	-7.5	0.157608	6	34.9135	-10.6764	-2.79988	27.7222	9.99124	b3844, b4117, b2903, b0507, b0010, b1380	ACt2rpp, ARGDC, FADRx, FE3Ri, FLVRx, GLXCL, GLYCL, LDH_D
1207	-58.9753	EX_succ_e	7.97592	-7.5	0.157608	6	34.9135	-10.6764	-2.79988	27.7222	9.99124	b3844, b4117, b4322, b2903, b0010, b1380	ACt2rpp, ARGDC, FADRx, FE3Ri, FLVRx, GLYCL, LDH_D, MNNH
1208	-58.9753	EX_succ_e	7.97592	-7.5	0.157608	6	34.9135	-10.6764	-2.79988	27.7222	9.99124	b3844, b2029, b4117, b2903, b0010, b1380	ACt2rpp, ARGDC, FADRx, FE3Ri, FLVRx, GLYCL, GND, LDH_D
1209	-58.9753	EX_succ_e	7.97592	-7.5	0.157608	6	34.9135	-10.6764	-2.79988	27.7222	9.99124	b3844, b4117, b4267, b2903, b0010, b1380	ACt2rpp, ARGDC, FADRx, FE3Ri, FLVRx, GLYCL, IDOND, IDOND2, LDH_D
1210	-58.9753	EX_succ_e	7.97592	-7.5	0.157608	6	34.9135	-10.6764	-2.79988	27.7222	9.99124	b3844, b4117, b2903, b0010, b1102, b1380	ACt2rpp, ARGDC, CPGNtonex, FADRx, FE3Ri, FLVRx, GLYCL, LDH_D
1211	-58.9753	EX_succ_e	7.97592	-7.5	0.157608	6	34.9135	-10.6764	-2.79988	27.7222	9.99124	b3844, b4117, b3091, b2903, b0010, b1380	ACt2rpp, ALTRH, ARGDC, FADRx, FE3Ri, FLVRx, GLYCL, LDH_D
1212	-58.9753	EX_succ_e	7.97592	-7.5	0.157608	6	34.9135	-10.6764	-2.79988	27.7222	9.99124	b3844, b4117, b2903, b0010, b1380, b2175	4PCPpp, ACt2rpp, AGM4PCPpp, ARGDC, FADRx, FE3Ri, FLVRx, GLYCL, LDH_D
1213	-58.9753	EX_succ_e	7.97592	-7.5	0.157608	6	34.9135	-10.6764	-2.79988	27.7222	9.99124	b3844, b1238, b4117, b2903, b0010, b1380	ACt2rpp, ARGDC, DURIK1, FADRx, FE3Ri, FLVRx, GLYCL, LDH_D, TMDK1
1214	-58.9753	EX_succ_e	7.97592	-7.5	0.157608	6	34.9135	-10.6764	-2.79988	27.7222	9.99124	b3844, b4117, b2903, b0010, b4071, b1380	ACt2rpp, ARGDC, FADRx, FE3Ri, FLVRx, GLYCL, LDH_D, NTRIR3pp, NTRIR4pp
1215	-58.9753	EX_succ_e	7.97592	-7.5	0.157608	6	34.9135	-10.6764	-2.79988	27.7222	9.99124	b3844, b4117, b0937, b2903, b0010, b1380	ACt2rpp, ARGDC, FADRx, FE3Ri, FLVRx, FMNRx, GLYCL, LDH_D
1216	-58.9753	EX_succ_e	7.97592	-7.5	0.157608	6	34.9135	-10.6764	-2.79988	27.7222	9.99124	b3844, b4117, b2903, b0010, b1186, b1380	ACt2rpp, ARGDC, FADRx, FE3Ri, FLVRx, GLYCL, LDH_D, NAt3_1p5pp
1217	-58.9753	EX_succ_e	7.97592	-7.5	0.157608	6	34.9135	-10.6764	-2.79988	27.7222	9.99124	b3844, b4117, b2688, b2903, b0010, b1380	ACt2rpp, ARGDC, FADRx, FE3Ri, FLVRx, GLUCYS, GLYCL, LDH_D
1218	-58.9753	EX_succ_e	7.97592	-7.5	0.157608	6	34.9135	-10.6764	-2.79988	27.7222	9.99124	b3844, b4117, b2903, b0010, b0150, b1380	ACt2rpp, ARGDC, FADRx, FE3HOXtonex, FE3Ri, FECRMtonex, FEOXAMtonex, FLVRx, GLYCL, LDH_D
1219	-58.9753	EX_succ_e	7.97592	-7.5	0.157608	6	34.9135	-10.6764	-2.79988	27.7222	9.99124	b3844, b4117, b2903, b2802, b0010, b1380	ACt2rpp, ARABDI, ARGDC, FADRx, FCI, FE3Ri, FLVRx, GLYCL, LDH_D
1220	-58.9753	EX_succ_e	7.97592	-7.5	0.157608	6	34.9135	-10.6764	-2.79988	27.7222	9.99124	b3844, b4117, b2903, b0010, b2801, b1380	ACt2rpp, ARGDC, FADRx, FE3Ri, FLVRx, FUCtpp, GLYCL, LDH_D
1221	-58.9753	EX_succ_e	7.97592	-7.5	0.157608	6	34.9135	-10.6764	-2.79988	27.7222	9.99124	b3844, b4117, b2903, b0010, b3409, b1380	ACt2rpp, ARGDC, FADRx, FE2abcpp, FE3Ri, FLVRx, GLYCL, LDH_D
1222	-58.9753	EX_succ_e	7.97592	-7.5	0.157608	6	34.9135	-10.6764	-2.79988	27.7222	9.99124	b3844, b4117, b2903, b0010, b2307, b1380	ACt2rpp, ARGDC, FADRx, FE3Ri, FLVRx, GLYCL, HISabcpp, LDH_D, LYSabcpp, ORNabcpp
1223	-58.9753	EX_succ_e	7.97592	-7.5	0.157608	6	34.9135	-10.6764	-2.79988	27.7222	9.99124	b3844, b4117, b1651, b2903, b0010, b1380	ACt2rpp, ARGDC, FADRx, FE3Ri, FLVRx, GLYCL, LDH_D, LGTHL
1224	-58.9753	EX_succ_e	7.97592	-7.5	0.157608	6	34.9135	-10.6764	-2.79988	27.7222	9.99124	b3844, b4117, b1199, b2903, b0010, b1380	ACt2rpp, ARGDC, DHAPT, FADRx, FE3Ri, FLVRx, GLYCL, LDH_D
1225	-58.9753	EX_succ_e	7.97592	-7.5	0.157608	6	34.9135	-10.6764	-2.79988	27.7222	9.99124	b3844, b4117, b1198, b2903, b0010, b1380	ACt2rpp, ARGDC, DHAPT, FADRx, FE3Ri, FLVRx, GLYCL, LDH_D
1226	-58.9753	EX_succ_e	7.97592	-7.5	0.157608	6	34.9135	-10.6764	-2.79988	27.7222	9.99124	b3844, b4117, b2903, b0010, b0110, b1380	ACt2rpp, AGM3PA, AGM4PA, AM3PA, AM4PA, ARGDC, FADRx, FE3Ri, FLVRx, GLYCL, LDH_D
1227	-58.9753	EX_succ_e	7.97592	-7.5	0.157608	6	34.9135	-10.6764	-2.79988	27.7222	9.99124	b0512, b3844, b4117, b2903, b0010, b1380	ACt2rpp, ALLTN, ARGDC, FADRx, FE3Ri, FLVRx, GLYCL, LDH_D
1228	-58.9753	EX_succ_e	7.97592	-7.5	0.157608	6	34.9135	-10.6764	-2.79988	27.7222	9.99124	b3844, b4117, b2903, b0010, b2676, b1380	ACt2rpp, ARGDC, FADRx, FE3Ri, FLVRx, GLYCL, LDH_D, RNDR1b, RNDR2b, RNDR3b, RNDR4b
1229	-58.9753	EX_succ_e	7.97592	-7.5	0.157608	6	34.9135	-10.6764	-2.79988	27.7222	9.99124	b3844, b4117, b2903, b0010, b2675, b1380	ACt2rpp, ARGDC, FADRx, FE3Ri, FLVRx, GLYCL, LDH_D, RNDR1b, RNDR2b, RNDR3b, RNDR4b
1230	-58.9753	EX_succ_e	7.97592	-7.5	0.157608	6	34.9135	-10.6764	-2.79988	27.7222	9.99124	b3844, b4117, b2903, b0010, b4067, b1380	ACt2rpp, ACt4pp, ARGDC, FADRx, FE3Ri, FLVRx, GLYCL, GLYCLTt4pp, LDH_D
1231	-58.9753	EX_succ_e	7.97592	-7.5	0.157608	6	34.9135	-10.6764	-2.79988	27.7222	9.99124	b3844, b4117, b2903, b3945, b0010, b1380	ACt2rpp, ALR4x, APPLDHr, ARGDC, FADRx, FE3Ri, FLVRx, GLYCDx, GLYCL, LALDO2x, LDH_D
1232	-58.9753	EX_succ_e	7.97592	-7.5	0.157608	6	34.9135	-10.6764	-2.79988	27.7222	9.99124	b3844, b4117, b0593, b2903, b0010, b1380	ACt2rpp, ARGDC, FADRx, FE3Ri, FLVRx, GLYCL, ICHORS_copy1, LDH_D
1233	-58.9753	EX_succ_e	7.97592	-7.5	0.157608	6	34.9135	-10.6764	-2.79988	27.7222	9.99124	b3844, b4117, b2903, b0010, b1189, b1380	ACt2rpp, ARGDC, DAAD, FADRx, FE3Ri, FLVRx, GLYCL, LDH_D
1234	-58.9753	EX_succ_e	7.97593	-7.5	0.157607	6	34.9135	-10.6764	-2.79988	27.7222	9.99123	b3844, b4117, b2903, b0010, b1380, b0155	ACt2rpp, ARGDC, CLt3_2pp, FADRx, FE3Ri, FLVRx, GLYCL, LDH_D
1235	-58.9753	EX_succ_e	7.97593	-7.5	0.157607	6	34.9135	-10.6764	-2.79988	27.7222	9.99123	b3844, b4117, b2903, b0010, b2320, b1380	ACt2rpp, ARGDC, FADRx, FE3Ri, FLVRx, GLYCL, LDH_D, PERD
1236	-58.9753	EX_succ_e	7.97593	-7.5	0.157607	6	34.9135	-10.6764	-2.79988	27.7222	9.99123	b3844, b0907, b4117, b2903, b0010, b1380	ACt2rpp, ARGDC, FADRx, FE3Ri, FLVRx, GLYCL, LDH_D, OHPBAT, PSERT
1237	-58.9753	EX_succ_e	7.97593	-7.5	0.157606	6	34.9135	-10.6764	-2.79988	27.7222	9.99122	b0870, b3844, b4117, b2903, b0010, b1380	4HTHRA, ACt2rpp, ARGDC, FADRx, FE3Ri, FLVRx, GLYCL, LDH_D
1238	-58.9749	EX_succ_e	7.97757	-7.5	0.156435	6	34.9131	-10.6764	-2.79939	27.7293	9.98323	b3844, b0521, b4117, b0010, b3927, b1380	ACt2rpp, ARGDC, CBMKr, FADRx, FE3Ri, FLVRx, GLYALDtpp, GLYtpp, LDH_D, UREAtpp
1239	-58.9743	EX_succ_e	7.97609	-7.5	0.157487	6	34.9125	-10.6764	-2.79989	27.7222	9.99019	b3844, b4117, b2903, b0010, b0112, b1380	ACt2rpp, ARGDC, FADRx, FE3Ri, FLVRx, GLYCL, HISt2rpp, LDH_D
1240	-58.9736	EX_succ_e	7.97592	-7.5	0.157608	4	34.9135	-11.0799	-2.79988	27.7222	9.99124	b4117, b2903, b0010, b1380	ACt2rpp, ARGDC, GLYCL, LDH_D
1241	-58.9729	EX_succ_e	7.97592	-7.5	0.157608	7	34.9135	-10.4813	-2.79988	27.7222	9.99124	b3844, b2463, b4117, b2903, b0010, b3915, b1380	ACt2rpp, ARGDC, FADRx, FE2t3pp, FE3Ri, FLVRx, GLYCL, HG2t3pp, LDH_D, ME2
1242	-58.9726	EX_succ_e	7.97608	-7.5	0.157499	6	34.9108	-10.6764	-2.80006	27.7209	9.98995	b3844, b4117, b2903, b0010, b1917, b1380	ACt2rpp, ARGDC, CYSabcpp, FADRx, FE3Ri, FLVRx, GLYCL, LDH_D
1243	-58.9726	EX_succ_e	7.97608	-7.5	0.157499	6	34.9108	-10.6764	-2.80006	27.7209	9.98995	b3844, b4117, b2903, b0010, b1920, b1380	ACt2rpp, ARGDC, CYSabcpp, FADRx, FE3Ri, FLVRx, GLYCL, LDH_D
1244	-58.9721	EX_succ_e	7.97646	-7.5	0.157229	6	34.9103	-10.6764	-2.79991	27.7223	9.98795	b3844, b4117, b2903, b0010, b1605, b1380	ACt2rpp, ARGDC, ARGORNt7pp, FADRx, FE3Ri, FLVRx, GLYCL, LDH_D
1245	-58.9717	EX_succ_e	7.97652	-7.5	0.157183	6	34.9099	-10.6764	-2.79991	27.7223	9.98755	b3844, b4117, b2903, b0010, b0809, b1380	ACt2rpp, ARGDC, FADRx, FE3Ri, FLVRx, GLNabcpp, GLYCL, LDH_D
1246	-58.9717	EX_succ_e	7.97652	-7.5	0.157183	6	34.9099	-10.6764	-2.79991	27.7223	9.98755	b3844, b4117, b2903, b0010, b0811, b1380	ACt2rpp, ARGDC, FADRx, FE3Ri, FLVRx, GLNabcpp, GLYCL, LDH_D
1247	-58.9683	EX_succ_e	7.97709	-7.5	0.15678	6	34.9064	-10.6764	-2.79995	27.7223	9.98405	b2508, b3844, b4117, b2903, b0010, b1380	ACt2rpp, ARGDC, FADRx, FE3Ri, FLVRx, GLYCL, IMPD, LDH_D
1248	-58.9671	EX_succ_e	7.98877	-7.5	0.148448	6	34.8442	-10.5542	-2.8001	27.7306	9.91378	b3844, b0010, b4115, b3927, b1380, b1206	ACt2rpp, ARGAGMt7pp, ASPtpp, FADRx, FE3Ri, FLVRx, FUMt1pp, GLYALDtpp, GLYtpp, LDH_D, SUCCt1pp, UREAtpp
1249	-58.9671	EX_succ_e	7.98877	-7.5	0.148448	6	34.8442	-10.5542	-2.8001	27.7306	9.91378	b3844, b4117, b0010, b3927, b1380, b1206	ACt2rpp, ARGDC, ASPtpp, FADRx, FE3Ri, FLVRx, FUMt1pp, GLYALDtpp, GLYtpp, LDH_D, SUCCt1pp, UREAtpp
1250	-58.9611	EX_succ_e	7.97982	-7.5	0.154828	6	34.8993	-10.6764	-2.79953	27.7295	9.96926	b3844, b0010, b4115, b3927, b1380, b0221	ACOAD1f, ACOAD2f, ACOAD3f, ACOAD4f, ACOAD5f, ACOAD6f, ACOAD7f, ACOAD8f, ACt2rpp, ARGAGMt7pp, FADRx, FE3Ri, FLVRx, GLYALDtpp, GLYtpp, LDH_D, UREAtpp
1251	-58.9611	EX_succ_e	7.97982	-7.5	0.154828	6	34.8993	-10.6764	-2.79953	27.7295	9.96926	b3844, b0010, b4115, b0452, b3927, b1380	ACt2rpp, ARGAGMt7pp, FACOAE100, FACOAE120, FACOAE140, FACOAE141, FACOAE160, FACOAE161, FACOAE180, FACOAE181, FACOAE60, FACOAE80, FADRx, FE3Ri, FLVRx, GLYALDtpp, GLYtpp, LDH_D, UREAtpp
1252	-58.9611	EX_succ_e	7.97982	-7.5	0.154828	6	34.8993	-10.6764	-2.79953	27.7295	9.96926	b3844, b4117, b0010, b0452, b3927, b1380	ACt2rpp, ARGDC, FACOAE100, FACOAE120, FACOAE140, FACOAE141, FACOAE160, FACOAE161, FACOAE180, FACOAE181, FACOAE60, FACOAE80, FADRx, FE3Ri, FLVRx, GLYALDtpp, GLYtpp, LDH_D, UREAtpp
1253	-58.9611	EX_succ_e	7.97982	-7.5	0.154828	6	34.8993	-10.6764	-2.79953	27.7295	9.96926	b2836, b3844, b4117, b0010, b3927, b1380	2AGPEAT120, 2AGPEAT140, 2AGPEAT141, 2AGPEAT160, 2AGPEAT161, 2AGPEAT180, 2AGPEAT181, 2AGPGAT120, 2AGPGAT140, 2AGPGAT141, 2AGPGAT160, 2AGPGAT161, 2AGPGAT180, 2AGPGAT181, AACPS1, AACPS2, AACPS3, AACPS4, AACPS5, AACPS6, AACPS7, AACPS8, AACPS9, ACt2rpp, ARGDC, FADRx, FE3Ri, FLVRx, GLYALDtpp, GLYtpp, LDH_D, UREAtpp
1254	-58.9611	EX_succ_e	7.97982	-7.5	0.154828	6	34.8993	-10.6764	-2.79953	27.7295	9.96926	b3844, b4117, b0010, b3927, b1380, b1695	ACOAD1fr, ACt2rpp, ARGDC, FADRx, FE3Ri, FLVRx, GLYALDtpp, GLYtpp, LDH_D, UREAtpp
1255	-58.9584	EX_succ_e	7.9887	-7.5	0.148494	6	34.8355	-10.5542	-2.80065	27.724	9.91211	b3844, b4117, b2903, b0010, b1380, b1206	ACt2rpp, ARGDC, ASPtpp, FADRx, FE3Ri, FLVRx, FUMt1pp, GLYCL, LDH_D, SUCCt1pp
1256	-58.957	EX_succ_e	7.97606	-7.5	0.157508	7	34.9952	-10.6764	-2.79256	27.7792	10.0085	b3771, b3844, b4117, b0010, b2199, b3927, b1380	ACt2rpp, ARGDC, DHAD1, DHAD2, FADRx, FE3Ri, FLVRx, GLYALDtpp, GLYtpp, LDH_D, PHEMEabcpp, UREAtpp
1257	-58.957	EX_succ_e	7.97606	-7.5	0.157508	7	34.9952	-10.6764	-2.79256	27.7792	10.0085	b3771, b3844, b0010, b3917, b4115, b3927, b1380	ACt2rpp, ARGAGMt7pp, DHAD1, DHAD2, FADRx, FE3Ri, FLVRx, GLYALDtpp, GLYtpp, LDH_D, UREAtpp
1258	-58.9552	EX_succ_e	7.97606	-7.5	0.157508	5	34.9952	-11.0799	-2.79256	27.7792	10.0085	b3771, b4117, b0010, b3927, b1380	ACt2rpp, ARGDC, DHAD1, DHAD2, GLYALDtpp, GLYtpp, LDH_D, UREAtpp
1259	-58.9552	EX_succ_e	7.97606	-7.5	0.157508	5	34.9952	-11.0799	-2.79256	27.7792	10.0085	b3771, b0010, b4115, b3927, b1380	ACt2rpp, ARGAGMt7pp, DHAD1, DHAD2, GLYALDtpp, GLYtpp, LDH_D, UREAtpp
1260	-58.952	EX_succ_e	7.97975	-7.5	0.154876	6	34.8901	-10.6764	-2.80011	27.7227	9.96752	b3844, b4117, b2903, b0010, b0452, b1380	ACt2rpp, ARGDC, FACOAE100, FACOAE120, FACOAE140, FACOAE141, FACOAE160, FACOAE161, FACOAE180, FACOAE181, FACOAE60, FACOAE80, FADRx, FE3Ri, FLVRx, GLYCL, LDH_D
1261	-58.952	EX_succ_e	7.97975	-7.5	0.154876	6	34.8901	-10.6764	-2.80011	27.7227	9.96752	b4117, b2903, b0010, b2424, b0452, b1380	ACt2rpp, ARGDC, FACOAE100, FACOAE120, FACOAE140, FACOAE141, FACOAE160, FACOAE161, FACOAE180, FACOAE181, FACOAE60, FACOAE80, GLYCL, LDH_D, SELabcpp, SLNTabcpp, TSULabcpp
1262	-58.8993	EX_succ_e	8.00449	-7.5	0.137236	6	34.7391	-10.4797	-2.80161	27.7264	9.81437	b3844, b4117, b2415, b2903, b0010, b1380	2DGLCptspp, ACGAptspp, ACMANAptspp, ACMUMptspp, ACt2rpp, ARBTptspp, ARGDC, ASCBptspp, CELBpts, CHTBSptspp, DHAPT, FADRx, FE3Ri, FLVRx, FRUpts2pp, FRUptspp, GALTptspp, GAMptspp, GLCptspp, GLYCL, LDH_D, MALTptspp, MANGLYCptspp, MANptspp, MNLptspp, SBTptspp, SUCptspp, TREptspp
1263	-58.8864	EX_succ_e	7.97599	-7.5	0.157559	7	34.9228	-10.6727	-2.79929	27.7291	9.99301	b0871, b3844, b4117, b0010, b4132, b3927, b1380	ACt2rpp, ARGDC, CADVtpp, FADRx, FE3Ri, FLVRx, GLYALDtpp, GLYtpp, LDH_D, POX, UREAtpp
1264	-58.8864	EX_succ_e	7.97599	-7.5	0.157559	7	34.9228	-10.6727	-2.79929	27.7291	9.99301	b3844, b4117, b0010, b3450, b4132, b3927, b1380	ACt2rpp, ARGDC, CADVtpp, FADRx, FE3Ri, FLVRx, G3PCabcpp, G3PEabcpp, G3PGabcpp, G3PIabcpp, G3PSabcpp, GLYALDtpp, GLYC2Pabcpp, GLYC3Pabcpp, GLYtpp, LDH_D, UREAtpp
1265	-58.8864	EX_succ_e	7.97599	-7.5	0.157559	7	34.9228	-10.6727	-2.79929	27.7291	9.99301	b3844, b4117, b0010, b4132, b1296, b3927, b1380	ACt2rpp, ARGDC, CADVtpp, FADRx, FE3Ri, FLVRx, GLYALDtpp, GLYtpp, LDH_D, UREAtpp
1266	-58.885	EX_succ_e	7.97664	-7.5	0.157096	7	34.9188	-10.6676	-2.79933	27.7292	9.98899	b3844, b0010, b4115, b2957, b4230, b3927, b1380	ACt2rpp, ARGAGMt7pp, ASNNpp, FADRx, FE3Ri, FLVRx, GLUNpp, GLYALDtpp, GLYtpp, LDH_D, UREAtpp
1267	-58.8847	EX_succ_e	7.97599	-7.5	0.157559	7	34.9228	-10.6763	-2.79929	27.7291	9.99301	b3844, b1602, b0010, b4115, b1764, b3927, b1380	ACt2rpp, ARGAGMt7pp, FADRx, FE3Ri, FLVRx, GLYALDtpp, GLYtpp, LDH_D, SELNPS, THD2pp, UREAtpp
1268	-58.8846	EX_succ_e	7.97599	-7.5	0.157559	7	34.9228	-10.6764	-2.79929	27.7291	9.99301	b2930, b3844, b0010, b4115, b2131, b3927, b1380	ACt2rpp, ARGAGMt7pp, CHLabcpp, FADRx, FE3Ri, FLVRx, GLYALDtpp, GLYtpp, LDH_D, UREAtpp
1269	-58.8846	EX_succ_e	7.97599	-7.5	0.157559	7	34.9228	-10.6764	-2.79929	27.7291	9.99301	b3844, b4117, b1748, b0010, b3927, b1380, b4238	ACt2rpp, ARGDC, FADRx, FE3Ri, FLVRx, GLYALDtpp, GLYtpp, LDH_D, RNTR1c2, RNTR2c2, RNTR3c2, RNTR4c2, SOTA, UREAtpp
1270	-58.8846	EX_succ_e	7.97599	-7.5	0.157559	7	34.9228	-10.6764	-2.79929	27.7291	9.99301	b3844, b4117, b1746, b0010, b3927, b1380, b0829	ACt2rpp, ARGDC, FADRx, FE3Ri, FLVRx, GLYALDtpp, GLYtpp, GTHRDabcpp, LDH_D, SGSAD, UREAtpp
1271	-58.8846	EX_succ_e	7.97599	-7.5	0.157559	7	34.9228	-10.6764	-2.79929	27.7291	9.99301	b3844, b0595, b0010, b4115, b3927, b1380, b2843	ACt2rpp, ARGAGMt7pp, FADRx, FE3Ri, FLVRx, GLYALDtpp, GLYtpp, ICHORT, KDUI, LDH_D, UREAtpp
1272	-58.8846	EX_succ_e	7.97599	-7.5	0.157559	7	34.9228	-10.6764	-2.79929	27.7291	9.99301	b3844, b4117, b0596, b0010, b3476, b3927, b1380	ACt2rpp, ARGDC, DHBD, FADRx, FE3Ri, FLVRx, GLYALDtpp, GLYtpp, LDH_D, UREAtpp
1273	-58.8846	EX_succ_e	7.97599	-7.5	0.157559	7	34.9228	-10.6764	-2.79929	27.7291	9.99301	b3781, b3844, b0010, b4115, b3927, b1380, b0494	ACt2rpp, ARGAGMt7pp, FADRx, FE3Ri, FLVRx, GLYALDtpp, GLYtpp, LDH_D, LPLIPAL1A120pp, LPLIPAL1A140pp, LPLIPAL1A141pp, LPLIPAL1A160pp, LPLIPAL1A161pp, LPLIPAL1A180pp, LPLIPAL1A181pp, LPLIPAL1E120pp, LPLIPAL1E140pp, LPLIPAL1E141pp, LPLIPAL1E160pp, LPLIPAL1E161pp, LPLIPAL1E180pp, LPLIPAL1E181pp, LPLIPAL1G120pp, LPLIPAL1G140pp, LPLIPAL1G141pp, LPLIPAL1G160pp, LPLIPAL1G161pp, LPLIPAL1G180pp, LPLIPAL1G18…
1274	-58.8846	EX_succ_e	7.97599	-7.5	0.157559	7	34.9228	-10.6764	-2.79929	27.7291	9.99301	b3500, b3844, b0677, b0010, b4115, b3927, b1380	ACt2rpp, AGDC, ARGAGMt7pp, FADRx, FE3Ri, FLVRx, GLYALDtpp, GLYtpp, GTHOr, LDH_D, UREAtpp
1275	-58.8846	EX_succ_e	7.97599	-7.5	0.157559	7	34.9228	-10.6764	-2.79929	27.7291	9.99301	b0072, b3844, b4117, b0010, b1981, b3927, b1380	ACt2rpp, ARGDC, FADRx, FE3Ri, FLVRx, GLYALDtpp, GLYtpp, IPPMIa, IPPMIb, LDH_D, SKMt2pp, UREAtpp
1276	-58.8846	EX_succ_e	7.97599	-7.5	0.157559	7	34.9228	-10.6764	-2.79929	27.7291	9.99301	b3844, b1236, b4323, b0010, b4115, b3927, b1380	ACt2rpp, ARGAGMt7pp, FADRx, FE3Ri, FLVRx, GALUi, GLYALDtpp, GLYtpp, LDH_D, MANAO, UREAtpp
1277	-58.8846	EX_succ_e	7.97599	-7.5	0.157559	7	34.9228	-10.6764	-2.79929	27.7291	9.99301	b3844, b4117, b0010, b4072, b2130, b3927, b1380	ACt2rpp, ARGDC, CHLabcpp, FADRx, FE3Ri, FLVRx, GLYALDtpp, GLYtpp, LDH_D, NTRIR3pp, NTRIR4pp, UREAtpp
1278	-58.8846	EX_succ_e	7.97599	-7.5	0.157559	7	34.9228	-10.6764	-2.79929	27.7291	9.99301	b3844, b0010, b4115, b1243, b3927, b1380, b0831	ACt2rpp, ARGAGMt7pp, FADRx, FE3Ri, FLVRx, GLYALDtpp, GLYtpp, GTHRDabcpp, LDH_D, UREAtpp
1279	-58.8846	EX_succ_e	7.97599	-7.5	0.157559	7	34.9228	-10.6764	-2.79929	27.7291	9.99301	b3844, b4117, b0010, b3224, b3927, b1380, b0831	ACNAMt2pp, ACt2rpp, ARGDC, FADRx, FE3Ri, FLVRx, GLYALDtpp, GLYtpp, GTHRDabcpp, LDH_D, UREAtpp
1280	-58.8846	EX_succ_e	7.97599	-7.5	0.157559	7	34.9228	-10.6764	-2.79929	27.7291	9.99301	b3844, b4117, b1319, b0010, b3927, b1380, b0831	ACt2rpp, ARGDC, FADRx, FE3Ri, FLVRx, GLYALDtpp, GLYtpp, GTHRDabcpp, LDH_D, UREAtpp
1281	-58.8846	EX_succ_e	7.97599	-7.5	0.157559	7	34.9228	-10.6764	-2.79929	27.7291	9.99301	b3115, b3844, b4117, b0010, b3849, b3927, b1380	ACt2rpp, ARGDC, FADRx, FE3Ri, FLVRx, GLYALDtpp, GLYtpp, LDH_D, PPAKr, UREAtpp
1282	-58.8846	EX_succ_e	7.97599	-7.5	0.157559	7	34.9228	-10.6764	-2.79929	27.7291	9.99301	b3844, b0046, b4117, b0344, b0010, b3927, b1380	ACt2rpp, ARGDC, FADRx, FE3Ri, FLVRx, GLYALDtpp, GLYtpp, LACZ, LDH_D, UREAtpp
1283	-58.8846	EX_succ_e	7.97599	-7.5	0.157559	7	34.9228	-10.6764	-2.79929	27.7291	9.99301	b3844, b3791, b0010, b4115, b3927, b1380, b4321	ACt2rpp, ARGAGMt7pp, FADRx, FE3Ri, FLVRx, FRUURt2rpp, GLYALDtpp, GLYtpp, LDH_D, TDPAGTA, UREAtpp
1284	-58.8846	EX_succ_e	7.97599	-7.5	0.157559	7	34.9228	-10.6764	-2.79929	27.7291	9.99301	b3844, b0010, b4115, b3927, b1380, b3488, b2374	ACt2rpp, ARGAGMt7pp, FADRx, FE3Ri, FLVRx, FORCT, GLYALDtpp, GLYtpp, INOSTO, LDH_D, UREAtpp
1285	-58.8846	EX_succ_e	7.97599	-7.5	0.157559	7	34.9228	-10.6764	-2.79929	27.7291	9.99301	b3844, b1200, b0004, b0010, b4115, b3927, b1380	ACt2rpp, ARGAGMt7pp, DHAPT, FADRx, FE3Ri, FLVRx, GLYALDtpp, GLYtpp, LDH_D, THRS, UREAtpp
1286	-58.8846	EX_succ_e	7.97599	-7.5	0.157559	7	34.9228	-10.6764	-2.79929	27.7291	9.99301	b3844, b4117, b4239, b0010, b3927, b1380, b4167	ACt2rpp, ARGDC, FADRx, FE3Ri, FLVRx, GLYALDtpp, GLYtpp, LDH_D, NADHXD, NADHXE, NADPHXD, NADPHXE, TRE6PH, UREAtpp
1287	-58.8846	EX_succ_e	7.97599	-7.5	0.157559	7	34.9228	-10.6764	-2.79929	27.7291	9.99301	b3844, b1747, b2918, b0010, b4115, b3927, b1380	ACt2rpp, ARGAGMt7pp, AST, FADRx, FE3Ri, FLVRx, GLYALDtpp, GLYtpp, LDH_D, UREAtpp
1288	-58.8846	EX_succ_e	7.97599	-7.5	0.157559	7	34.9228	-10.6764	-2.79929	27.7291	9.99301	b3844, b1744, b0010, b4115, b3390, b3927, b1380	ACt2rpp, ARGAGMt7pp, FADRx, FE3Ri, FLVRx, GLYALDtpp, GLYtpp, LDH_D, SGDS, UREAtpp
1289	-58.8846	EX_succ_e	7.97599	-7.5	0.157559	7	34.9228	-10.6764	-2.79929	27.7291	9.99301	b0078, b3844, b4117, b0010, b3409, b3927, b1380	ACt2rpp, ARGDC, FADRx, FE2abcpp, FE3Ri, FLVRx, GLYALDtpp, GLYtpp, LDH_D, UREAtpp
1290	-58.8846	EX_succ_e	7.97599	-7.5	0.157559	7	34.9228	-10.6764	-2.79929	27.7291	9.99301	b3844, b3826, b0010, b4115, b3409, b3927, b1380	ACt2rpp, ARGAGMt7pp, FADRx, FE2abcpp, FE3Ri, FLVRx, GLYALDtpp, GLYtpp, LDH_D, UREAtpp
1291	-58.8846	EX_succ_e	7.97599	-7.5	0.157559	7	34.9228	-10.6764	-2.79929	27.7291	9.99301	b3844, b1768, b0010, b3568, b4115, b3927, b1380	ACt2rpp, ARGAGMt7pp, FADRx, FE3Ri, FLVRx, GLYALDtpp, GLYtpp, LDH_D, NNAM, UREAtpp, XYLabcpp
1292	-58.8846	EX_succ_e	7.97599	-7.5	0.157559	7	34.9228	-10.6764	-2.79929	27.7291	9.99301	b3844, b1744, b4117, b0004, b0010, b3927, b1380	ACt2rpp, ARGDC, FADRx, FE3Ri, FLVRx, GLYALDtpp, GLYtpp, LDH_D, SGDS, THRS, UREAtpp
1293	-58.8846	EX_succ_e	7.97599	-7.5	0.157559	7	34.9228	-10.6764	-2.79929	27.7291	9.99301	b3844, b4117, b0010, b3927, b1380, b1821, b2262	ACt2rpp, ARGDC, DHNCOAS, FADRx, FE3Ri, FLVRx, GLYALDtpp, GLYtpp, LDH_D, MN2tipp, UREAtpp
1294	-58.8846	EX_succ_e	7.97599	-7.5	0.157559	7	34.9228	-10.6764	-2.79929	27.7291	9.99301	b0243, b3844, b4117, b0010, b3927, b1380, b0662	ACt2rpp, ARGDC, FADRx, FE3Ri, FLVRx, G5SD, GLYALDtpp, GLYtpp, LDH_D, OMMBLHXy, UREAtpp
1295	-58.8846	EX_succ_e	7.97599	-7.5	0.157559	7	34.9228	-10.6764	-2.79929	27.7291	9.99301	b0243, b3844, b4117, b0010, b3927, b1380, b0789	ACt2rpp, ARGDC, FADRx, FE3Ri, FLVRx, G5SD, GLYALDtpp, GLYtpp, LDH_D, UREAtpp
1296	-58.8846	EX_succ_e	7.97599	-7.5	0.157559	7	34.9228	-10.6764	-2.79929	27.7291	9.99301	b0243, b3844, b0010, b4115, b3571, b3927, b1380	AAMYLpp, ACt2rpp, ARGAGMt7pp, FADRx, FE3Ri, FLVRx, G5SD, GLYALDtpp, GLYtpp, LDH_D, UREAtpp
1297	-58.8846	EX_succ_e	7.97599	-7.5	0.157559	7	34.9228	-10.6764	-2.79929	27.7291	9.99301	b4468, b3844, b1225, b0010, b4115, b3927, b1380	ACt2rpp, ARGAGMt7pp, FADRx, FE3Ri, FLVRx, GLYALDtpp, GLYCTO2, GLYCTO3, GLYCTO4, GLYtpp, LDH_D, UREAtpp
1298	-58.8846	EX_succ_e	7.97599	-7.5	0.157559	7	34.9228	-10.6764	-2.79929	27.7291	9.99301	b2979, b3008, b3844, b0010, b4115, b3927, b1380	ACt2rpp, ARGAGMt7pp, FADRx, FE3Ri, FLVRx, GLYALDtpp, GLYCTO2, GLYCTO3, GLYCTO4, GLYtpp, LDH_D, UREAtpp
1299	-58.8846	EX_succ_e	7.97599	-7.5	0.157559	7	34.9228	-10.6764	-2.79929	27.7291	9.99301	b3844, b4117, b0677, b0010, b3927, b1380, b1794	ACt2rpp, AGDC, ARGDC, FADRx, FE3Ri, FLVRx, GLYALDtpp, GLYtpp, LDH_D, UREAtpp
1300	-58.8846	EX_succ_e	7.97599	-7.5	0.157559	7	34.9228	-10.6764	-2.79929	27.7291	9.99301	b3844, b4117, b0273, b0010, b1119, b3927, b1380	ACGAMK, ACt2rpp, ARGDC, FADRx, FE3Ri, FLVRx, GLYALDtpp, GLYtpp, LDH_D, UREAtpp
1301	-58.8846	EX_succ_e	7.97599	-7.5	0.157559	7	34.9228	-10.6764	-2.79929	27.7291	9.99301	b4468, b0222, b3844, b4117, b0010, b3927, b1380	ACt2rpp, ARGDC, FADRx, FE3Ri, FLVRx, GLYALDtpp, GLYCTO2, GLYCTO3, GLYCTO4, GLYtpp, LDH_D, S7PI, UREAtpp
1302	-58.8846	EX_succ_e	7.97599	-7.5	0.157559	7	34.9228	-10.6764	-2.79929	27.7291	9.99301	b3844, b4117, b3526, b0010, b1443, b3927, b1380	ACt2rpp, ARGDC, DDGLK, FADRx, FE3Ri, FLVRx, GLYALDtpp, GLYtpp, LDH_D, UREAtpp
1303	-58.8846	EX_succ_e	7.97599	-7.5	0.157559	7	34.9228	-10.6764	-2.79929	27.7291	9.99301	b3844, b0888, b4117, b0010, b4067, b3927, b1380	ACt2rpp, ACt4pp, ARGDC, FADRx, FE3Ri, FLVRx, GLYALDtpp, GLYCLTt4pp, GLYtpp, LDH_D, TRDR, UREAtpp
1304	-58.8846	EX_succ_e	7.97599	-7.5	0.157559	7	34.9228	-10.6764	-2.79929	27.7291	9.99301	b3844, b4117, b0010, b2260, b3927, b1380, b2430	ACt2rpp, ARGDC, FADRx, FE3Ri, FLVRx, GLYALDtpp, GLYtpp, LDH_D, SUCBZL, UREAtpp
1305	-58.8846	EX_succ_e	7.97599	-7.5	0.157559	7	34.9228	-10.6764	-2.79929	27.7291	9.99301	b3844, b4117, b0010, b3927, b1380, b0149, b2264	ACt2rpp, ARGDC, FADRx, FE3Ri, FLVRx, GLYALDtpp, GLYtpp, LDH_D, SEPHCHCS, UREAtpp
1306	-58.8846	EX_succ_e	7.97599	-7.5	0.157559	7	34.9228	-10.6764	-2.79929	27.7291	9.99301	b3831, b3844, b4117, b0010, b3927, b1380, b1686	ACt2rpp, ARGDC, DHNCOAT, FADRx, FE3Ri, FLVRx, GLYALDtpp, GLYtpp, LDH_D, PYNP2r, UREAtpp
1307	-58.8846	EX_succ_e	7.97599	-7.5	0.157559	7	34.9228	-10.6764	-2.79929	27.7291	9.99301	b3844, b4117, b0505, b0010, b0857, b3927, b1380	ACt2rpp, ARGDC, FADRx, FE3Ri, FLVRx, GLYALDtpp, GLYtpp, LDH_D, UGLYCH, UREAtpp
1308	-58.8846	EX_succ_e	7.97599	-7.5	0.157559	7	34.9228	-10.6764	-2.79929	27.7291	9.99301	b3844, b4117, b0937, b0010, b2429, b3927, b1380	ACMUMptspp, ACt2rpp, ARGDC, FADRx, FE3Ri, FLVRx, FMNRx, GLYALDtpp, GLYtpp, LDH_D, SUCptspp, UREAtpp
1309	-58.8846	EX_succ_e	7.97599	-7.5	0.157559	7	34.9228	-10.6764	-2.79929	27.7291	9.99301	b3844, b0937, b0010, b4115, b1991, b3927, b1380	ACt2rpp, ARGAGMt7pp, FADRx, FE3Ri, FLVRx, FMNRx, GLYALDtpp, GLYtpp, LDH_D, NNDMBRT, UREAtpp
1310	-58.8846	EX_succ_e	7.97599	-7.5	0.157559	7	34.9228	-10.6764	-2.79929	27.7291	9.99301	b3844, b4117, b0937, b0010, b3927, b1380, b1734	ACt2rpp, ARGDC, FADRx, FE3Ri, FLVRx, FMNRx, GLYALDtpp, GLYtpp, LDH_D, MC6PH, UREAtpp
1311	-58.8846	EX_succ_e	7.97599	-7.5	0.157559	7	34.9228	-10.6764	-2.79929	27.7291	9.99301	b3844, b4117, b0010, b1064, b3927, b1380, b3542	ACt2rpp, ARGDC, ASR, CGLYabcpp, FADRx, FE3Ri, FLVRx, GLYALDtpp, GLYtpp, LDH_D, PROGLYabcpp, UREAtpp
1312	-58.8846	EX_succ_e	7.97599	-7.5	0.157559	7	34.9228	-10.6764	-2.79929	27.7291	9.99301	b3844, b4117, b2668, b0010, b3927, b1380, b3540	ACt2rpp, ARGDC, CGLYabcpp, FADRx, FE3Ri, FLVRx, GLYALDtpp, GLYtpp, LDH_D, PROGLYabcpp, UREAtpp
1313	-58.8846	EX_succ_e	7.97599	-7.5	0.157559	7	34.9228	-10.6764	-2.79929	27.7291	9.99301	b3844, b0002, b4117, b0010, b3927, b1380, b3541	ACt2rpp, ARGDC, CGLYabcpp, FADRx, FE3Ri, FLVRx, GLYALDtpp, GLYtpp, LDH_D, PROGLYabcpp, UREAtpp
1314	-58.8846	EX_succ_e	7.97599	-7.5	0.157559	7	34.9228	-10.6764	-2.79929	27.7291	9.99301	b3844, b0010, b4115, b3927, b1380, b0508, b4238	ACt2rpp, ARGAGMt7pp, FADRx, FE3Ri, FLVRx, GLYALDtpp, GLYtpp, HPYRI, LDH_D, RNTR1c2, RNTR2c2, RNTR3c2, RNTR4c2, UREAtpp
1315	-58.8846	EX_succ_e	7.97599	-7.5	0.157559	7	34.9228	-10.6764	-2.79929	27.7291	9.99301	b3752, b3844, b4117, b0010, b2841, b3927, b1380	ACt2rpp, ARBt2rpp, ARGDC, FADRx, FE3Ri, FLVRx, GLYALDtpp, GLYtpp, LDH_D, RBK, UREAtpp
1316	-58.8846	EX_succ_e	7.97599	-7.5	0.157559	7	34.9228	-10.6764	-2.79929	27.7291	9.99301	b3844, b1198, b0010, b4115, b3927, b1380, b0404	ACt2rpp, ARGAGMt7pp, DHAPT, FA100ACPHi, FA120ACPHi, FA140ACPHi, FA141ACPHi, FA160ACPHi, FA161ACPHi, FA80ACPHi, FADRx, FE3Ri, FLVRx, GLYALDtpp, GLYtpp, LDH_D, UREAtpp
1317	-58.8846	EX_succ_e	7.97599	-7.5	0.157559	7	34.9228	-10.6764	-2.79929	27.7291	9.99301	b2341, b3844, b4117, b4323, b0010, b3927, b1380	ACt2rpp, ARGDC, FADRx, FE3Ri, FLVRx, GLYALDtpp, GLYtpp, LDH_D, MANAO, UREAtpp
1318	-58.8846	EX_succ_e	7.97599	-7.5	0.157559	7	34.9228	-10.6764	-2.79929	27.7291	9.99301	b3844, b4117, b0010, b2239, b3927, b1380, b2924	ACt2rpp, ARGDC, FADRx, FE3Ri, FLVRx, GLYALDtpp, GLYtpp, GPDDA1pp, GPDDA2pp, GPDDA3pp, GPDDA4pp, GPDDA5pp, LDH_D, UREAtpp
1319	-58.8846	EX_succ_e	7.97599	-7.5	0.157559	7	34.9228	-10.6764	-2.79929	27.7291	9.99301	b3844, b4117, b0010, b2239, b3927, b1380, b0211	ACt2rpp, ARGDC, FADRx, FE3Ri, FLVRx, GLYALDtpp, GLYtpp, GPDDA1pp, GPDDA2pp, GPDDA3pp, GPDDA4pp, GPDDA5pp, LDH_D, UREAtpp
1320	-58.8846	EX_succ_e	7.97599	-7.5	0.157559	7	34.9228	-10.6764	-2.79929	27.7291	9.99301	b3844, b0010, b4115, b2943, b3927, b1380, b4386	ACt2rpp, ARGAGMt7pp, FADRx, FE3Ri, FLVRx, GALt2pp, GLCt2pp, GLYALDtpp, GLYtpp, LDH_D, LIPAMPL, LIPATPT, OCTNLL, UREAtpp
1321	-58.8846	EX_succ_e	7.97599	-7.5	0.157559	7	34.9228	-10.6764	-2.79929	27.7291	9.99301	b2418, b3844, b4117, b0010, b3927, b1380, b0444	ACt2rpp, ARGDC, CCGS, FADRx, FE3Ri, FLVRx, GLYALDtpp, GLYtpp, LDH_D, PYDAMK, PYDXNK, UREAtpp
1322	-58.8846	EX_succ_e	7.97599	-7.5	0.157559	7	34.9228	-10.6764	-2.79929	27.7291	9.99301	b2418, b3844, b4117, b0010, b3927, b1380, b2765	ACt2rpp, ARGDC, CPH4S, FADRx, FE3Ri, FLVRx, GLYALDtpp, GLYtpp, LDH_D, PYDAMK, PYDXNK, UREAtpp
1323	-58.8846	EX_succ_e	7.97599	-7.5	0.157559	7	34.9228	-10.6764	-2.79929	27.7291	9.99301	b3844, b4117, b0010, b2169, b3927, b1380, b2309	ACt2rpp, ARGDC, FADRx, FE3Ri, FLVRx, FRUptspp, GLYALDtpp, GLYtpp, HISabcpp, LDH_D, UREAtpp
1324	-58.8846	EX_succ_e	7.97599	-7.5	0.157559	7	34.9228	-10.6764	-2.79929	27.7291	9.99301	b2465, b3844, b4117, b0010, b3927, b1380, b2309	ACt2rpp, ARGDC, FADRx, FE3Ri, FLVRx, GLYALDtpp, GLYtpp, HISabcpp, LDH_D, UREAtpp
1325	-58.8846	EX_succ_e	7.97599	-7.5	0.157559	7	34.9228	-10.6764	-2.79929	27.7291	9.99301	b3844, b4117, b3806, b3875, b0010, b3927, b1380	ACt2rpp, ADNCYC, ARGDC, DHPStex, FADRx, FE3Ri, FLVRx, GLYALDtpp, GLYtpp, LDH_D, SQtex, UREAtpp
1326	-58.8846	EX_succ_e	7.97599	-7.5	0.157559	7	34.9228	-10.6764	-2.79929	27.7291	9.99301	b0586, b3844, b4117, b0010, b2789, b3927, b1380	ACt2rpp, ARGDC, FADRx, FE3Ri, FLVRx, GLYALDtpp, GLYtpp, LDH_D, SERASr, UREAtpp
1327	-58.8846	EX_succ_e	7.97599	-7.5	0.157559	7	34.9228	-10.6764	-2.79929	27.7291	9.99301	b3844, b4117, b1199, b0010, b3927, b1380, b1710	ACt2rpp, ARGDC, DHAPT, FADRx, FE3Ri, FLVRx, GLYALDtpp, GLYtpp, GTHPi, LDH_D, UREAtpp
1328	-58.8846	EX_succ_e	7.97599	-7.5	0.157559	7	34.9228	-10.6764	-2.79929	27.7291	9.99301	b3617, b3844, b4117, b0010, b1442, b3927, b1380	ACt2rpp, ARGDC, FADRx, FE3Ri, FLVRx, GLYALDtpp, GLYAT, GLYtpp, LDH_D, UREAtpp
1329	-58.8846	EX_succ_e	7.97599	-7.5	0.157559	7	34.9228	-10.6764	-2.79929	27.7291	9.99301	b3617, b3844, b4117, b0010, b3927, b1380, b1113	ACt2rpp, ARGDC, FADRx, FE3Ri, FLVRx, GLYALDtpp, GLYAT, GLYtpp, LDH_D, UREAtpp
1330	-58.8846	EX_succ_e	7.97599	-7.5	0.157559	7	34.9228	-10.6764	-2.79929	27.7291	9.99301	b3844, b4117, b0507, b0010, b3829, b3927, b1380	ACt2rpp, ARGDC, FADRx, FE3Ri, FLVRx, GLXCL, GLYALDtpp, GLYtpp, LDH_D, UREAtpp
1331	-58.8846	EX_succ_e	7.97599	-7.5	0.157559	7	34.9228	-10.6764	-2.79929	27.7291	9.99301	b3844, b0758, b0010, b4115, b4032, b3927, b1380	14GLUCANabcpp, ACt2rpp, ARGAGMt7pp, FADRx, FE3Ri, FLVRx, GLYALDtpp, GLYtpp, LDH_D, MALTHXabcpp, MALTPTabcpp, MALTTRabcpp, MALTTTRabcpp, MALTabcpp, UGLT, UREAtpp
1332	-58.8846	EX_succ_e	7.97599	-7.5	0.157559	7	34.9228	-10.6764	-2.79929	27.7291	9.99301	b3844, b0758, b1636, b0010, b4115, b3927, b1380	ACt2rpp, ARGAGMt7pp, FADRx, FE3Ri, FLVRx, GLYALDtpp, GLYtpp, LDH_D, UGLT, UREAtpp
1333	-58.8846	EX_succ_e	7.97599	-7.5	0.157559	7	34.9228	-10.6764	-2.79929	27.7291	9.99301	b3844, b0758, b0010, b4115, b2536, b3927, b1380	ACt2rpp, ARGAGMt7pp, FADRx, FE3Ri, FLVRx, GLYALDtpp, GLYtpp, LDH_D, PPPNt2rpp, UGLT, UREAtpp
1334	-58.8846	EX_succ_e	7.97599	-7.5	0.157559	7	34.9228	-10.6764	-2.79929	27.7291	9.99301	b3844, b4117, b0010, b0757, b3927, b1380, b4130	ACt2rpp, ARGDC, FADRx, FE3Ri, FLVRx, GALKr, GLYALDtpp, GLYtpp, LDH_D, UREAtpp
1335	-58.8846	EX_succ_e	7.97599	-7.5	0.157559	7	34.9228	-10.6764	-2.79929	27.7291	9.99301	b3403, b3844, b4117, b0010, b3161, b3927, b1380	ACt2rpp, ARGDC, FADRx, FE3Ri, FLVRx, GLYALDtpp, GLYtpp, INDOLEt2rpp, LDH_D, PPCK, UREAtpp
1336	-58.8846	EX_succ_e	7.97599	-7.5	0.157559	7	34.9228	-10.6764	-2.79929	27.7291	9.99301	b3844, b2215, b0010, b4115, b3927, b1380, b2906	ACt2rpp, ARGAGMt7pp, FADRx, FE3Ri, FLVRx, GLYALDtpp, GLYtpp, LDH_D, OPHHXy, UREAtpp
1337	-58.8846	EX_succ_e	7.97599	-7.5	0.157559	7	34.9228	-10.6764	-2.79929	27.7291	9.99301	b3844, b0010, b4115, b3502, b3927, b1380, b2906	ACt2rpp, ARGAGMt7pp, ASO3t8pp, FADRx, FE3Ri, FLVRx, GLYALDtpp, GLYtpp, LDH_D, OPHHXy, UREAtpp
1338	-58.8846	EX_succ_e	7.97599	-7.5	0.157559	7	34.9228	-10.6764	-2.79929	27.7291	9.99301	b3844, b0010, b4115, b0854, b3927, b1380, b2906	ACt2rpp, ARGAGMt7pp, FADRx, FE3Ri, FLVRx, GLYALDtpp, GLYtpp, LDH_D, OPHHXy, UREAtpp
1339	-58.8846	EX_succ_e	7.97599	-7.5	0.157559	7	34.9228	-10.6764	-2.79929	27.7291	9.99301	b3614, b3844, b4117, b0010, b3927, b1380, b1391	ACt2rpp, ARGDC, CDPPH, FADRx, FE3Ri, FLVRx, GLYALDtpp, GLYtpp, LDH_D, NDP7, PACCOAE, UREAtpp
1340	-58.8846	EX_succ_e	7.97599	-7.5	0.157559	7	34.9228	-10.6764	-2.79929	27.7291	9.99301	b3916, b3844, b4117, b0010, b3927, b1380, b0723	ACt2rpp, ARGDC, FADRx, FE3Ri, FLVRx, GLYALDtpp, GLYtpp, LDH_D, PFK_2, PFK_3, SUCDi, UREAtpp
1341	-58.8846	EX_succ_e	7.97599	-7.5	0.157559	7	34.9228	-10.6764	-2.79929	27.7291	9.99301	b3844, b4117, b0010, b1736, b3927, b1380, b4129	ACt2rpp, AP4AS, ARGDC, CHTBSptspp, FADRx, FE3Ri, FLVRx, GLYALDtpp, GLYtpp, LDH_D, UREAtpp
1342	-58.8846	EX_succ_e	7.97599	-7.5	0.157559	7	34.9228	-10.6764	-2.79929	27.7291	9.99301	b3197, b3844, b4117, b0010, b3927, b1380, b4129	ACt2rpp, AP4AS, ARGDC, FADRx, FE3Ri, FLVRx, GLYALDtpp, GLYtpp, LDH_D, UREAtpp
1343	-58.8846	EX_succ_e	7.97599	-7.5	0.157559	7	34.9228	-10.6764	-2.79929	27.7291	9.99301	b0049, b3844, b4117, b0010, b3927, b1380, b4100	ACt2rpp, AP4AH, AP5AH, ARGDC, ARMEPNS, FADRx, FE3Ri, FLVRx, GLYALDtpp, GLYtpp, GP4GH, LDH_D, UREAtpp
1344	-58.8846	EX_succ_e	7.97599	-7.5	0.157559	7	34.9228	-10.6764	-2.79929	27.7291	9.99301	b3844, b4117, b0010, b2679, b2492, b3927, b1380	ACt2rpp, ARGDC, CRNDabcpp, CRNabcpp, CTBTabcpp, FADRx, FE3Ri, FLVRx, GLYALDtpp, GLYtpp, LDH_D, PROabcpp, UREAtpp
1345	-58.8846	EX_succ_e	7.97599	-7.5	0.157559	7	34.9228	-10.6764	-2.79929	27.7291	9.99301	b3844, b0010, b4115, b2677, b3927, b1380, b3856	ACt2rpp, ARGAGMt7pp, CRNDabcpp, CRNabcpp, CTBTabcpp, FADRx, FE3Ri, FLVRx, GLYALDtpp, GLYtpp, LDH_D, PROabcpp, UREAtpp
1346	-58.8846	EX_succ_e	7.97599	-7.5	0.157559	7	34.9228	-10.6764	-2.79929	27.7291	9.99301	b3844, b0010, b4115, b2486, b2679, b3927, b1380	ACt2rpp, ARGAGMt7pp, CRNDabcpp, CRNabcpp, CTBTabcpp, FADRx, FE3Ri, FLVRx, GLYALDtpp, GLYtpp, LDH_D, PROabcpp, UREAtpp
1347	-58.8846	EX_succ_e	7.97599	-7.5	0.157559	7	34.9228	-10.6764	-2.79929	27.7291	9.99301	b3011, b3844, b4117, b1236, b0010, b3927, b1380	13PPDH2, ACt2rpp, ARGDC, FADRx, FE3Ri, FLVRx, GALUi, GLYALDtpp, GLYtpp, LDH_D, UREAtpp
1348	-58.8846	EX_succ_e	7.97599	-7.5	0.157559	7	34.9228	-10.6764	-2.79929	27.7291	9.99301	b3844, b0010, b4115, b3927, b1380, b2164, b3924	ACt2rpp, ARGAGMt7pp, FADRx, FE3Ri, FLDR2, FLVRx, GLYALDtpp, GLYtpp, LDH_D, PSURItpp, UREAtpp
1349	-58.8846	EX_succ_e	7.97599	-7.5	0.157559	7	34.9228	-10.6764	-2.79929	27.7291	9.99301	b3115, b3844, b0010, b4115, b4265, b3927, b1380	5DGLCNt2rpp, ACt2rpp, ARGAGMt7pp, FADRx, FE3Ri, FLVRx, GLYALDtpp, GLYtpp, IDONt2rpp, LDH_D, PPAKr, UREAtpp
1350	-58.8846	EX_succ_e	7.97599	-7.5	0.157559	7	34.9228	-10.6764	-2.79929	27.7291	9.99301	b3844, b4117, b3589, b0010, b3927, b1380, b0543	ACt2rpp, ARGDC, CHLt3pp, FADRx, FE3Ri, FLVRx, GLYALDtpp, GLYBt3pp, GLYtpp, LDH_D, UREAtpp
1351	-58.8846	EX_succ_e	7.97599	-7.5	0.157559	7	34.9228	-10.6764	-2.79929	27.7291	9.99301	b3844, b0010, b4115, b2536, b3927, b1380, b0543	ACt2rpp, ARGAGMt7pp, CHLt3pp, FADRx, FE3Ri, FLVRx, GLYALDtpp, GLYBt3pp, GLYtpp, LDH_D, PPPNt2rpp, UREAtpp
1352	-58.8846	EX_succ_e	7.97599	-7.5	0.157559	7	34.9228	-10.6764	-2.79929	27.7291	9.99301	b3844, b2162, b4117, b0010, b0588, b3927, b1380	ACt2rpp, ARGDC, DHBSZ3FEabcpp, FADRx, FE3Ri, FEENTERabcpp, FLVRx, GLYALDtpp, GLYtpp, LDH_D, UREAtpp
1353	-58.8846	EX_succ_e	7.97599	-7.5	0.157559	7	34.9228	-10.6764	-2.79929	27.7291	9.99301	b3844, b0010, b0588, b4115, b0857, b3927, b1380	ACt2rpp, ARGAGMt7pp, DHBSZ3FEabcpp, FADRx, FE3Ri, FEENTERabcpp, FLVRx, GLYALDtpp, GLYtpp, LDH_D, UREAtpp
1354	-58.8846	EX_succ_e	7.97599	-7.5	0.157559	7	34.9228	-10.6764	-2.79929	27.7291	9.99301	b3844, b3248, b1651, b0010, b4115, b3927, b1380	ACt2rpp, ARGAGMt7pp, FADRx, FE3Ri, FLVRx, GLYALDtpp, GLYtpp, LDH_D, LGTHL, UREAtpp
1355	-58.8846	EX_succ_e	7.97599	-7.5	0.157559	7	34.9228	-10.6764	-2.79929	27.7291	9.99301	b3416, b3844, b4117, b0010, b3927, b1380, b1474	ACt2rpp, AMALT1, AMALT2, AMALT3, AMALT4, ARGDC, FADRx, FE3Ri, FLVRx, GLYALDtpp, GLYtpp, LDH_D, UREAtpp
1356	-58.8846	EX_succ_e	7.97599	-7.5	0.157559	7	34.9228	-10.6764	-2.79929	27.7291	9.99301	b3844, b0333, b0758, b0010, b4115, b3927, b1380	ACt2rpp, ARGAGMt7pp, FADRx, FE3Ri, FLVRx, GLYALDtpp, GLYtpp, LDH_D, MCITS, UGLT, UREAtpp
1357	-58.8846	EX_succ_e	7.97599	-7.5	0.157559	7	34.9228	-10.6764	-2.79929	27.7291	9.99301	b1261, b3844, b0732, b4117, b0010, b3927, b1380	ACt2rpp, ARGDC, FADRx, FE3Ri, FLVRx, GLYALDtpp, GLYtpp, LDH_D, MANPGH, TRPS1, TRPS2, TRPS3, UREAtpp
1358	-58.8846	EX_succ_e	7.97599	-7.5	0.157559	7	34.9228	-10.6764	-2.79929	27.7291	9.99301	b1261, b3844, b4117, b0010, b3927, b1380, b2037	ACt2rpp, ARGDC, FADRx, FE3Ri, FLVRx, GLYALDtpp, GLYtpp, LDH_D, O16AUNDtpp, TRPS1, TRPS2, TRPS3, UREAtpp
1359	-58.8846	EX_succ_e	7.97599	-7.5	0.157559	7	34.9228	-10.6764	-2.79929	27.7291	9.99301	b1260, b3844, b0010, b4115, b3666, b3927, b1380	ACt2rpp, ARGAGMt7pp, F6Pt6_2pp, FADRx, FE3Ri, FLVRx, G6Pt6_2pp, GAM6Pt6_2pp, GLYALDtpp, GLYtpp, LDH_D, MAN6Pt6_2pp, TRPS1, TRPS2, TRPS3, UREAtpp
1360	-58.8846	EX_succ_e	7.97599	-7.5	0.157559	7	34.9228	-10.6764	-2.79929	27.7291	9.99301	b0903, b3844, b0010, b4115, b1186, b3927, b1380	ACt2rpp, ARGAGMt7pp, FADRx, FE3Ri, FLVRx, GLYALDtpp, GLYtpp, LDH_D, NAt3_1p5pp, UREAtpp
1361	-58.8846	EX_succ_e	7.97599	-7.5	0.157559	7	34.9228	-10.6764	-2.79929	27.7291	9.99301	b3844, b0010, b4115, b1186, b3927, b1380, b0826	ACt2rpp, ARGAGMt7pp, FADRx, FE3Ri, FLVRx, GLYALDtpp, GLYtpp, LDH_D, MPTSS, NAt3_1p5pp, UREAtpp
1362	-58.8846	EX_succ_e	7.97599	-7.5	0.157559	7	34.9228	-10.6764	-2.79929	27.7291	9.99301	b3844, b4117, b0010, b2308, b2149, b3927, b1380	ACt2rpp, ARGDC, FADRx, FE3Ri, FLVRx, GLCabcpp, GLYALDtpp, GLYtpp, HISabcpp, LDH_D, LYSabcpp, ORNabcpp, UREAtpp
1363	-58.8846	EX_succ_e	7.97599	-7.5	0.157559	7	34.9228	-10.6764	-2.79929	27.7291	9.99301	b3844, b4117, b4139, b0010, b3478, b3927, b1380	ACt2rpp, ARGDC, ASPT, FADRx, FE3Ri, FLVRx, GLYALDtpp, GLYtpp, LDH_D, UREAtpp
1364	-58.8846	EX_succ_e	7.97599	-7.5	0.157559	7	34.9228	-10.6764	-2.79929	27.7291	9.99301	b3844, b2787, b0010, b2964, b4115, b3927, b1380	ACt2rpp, ARGAGMt7pp, DGSNt2pp, DINSt2pp, FADRx, FE3Ri, FLVRx, GLYALDtpp, GLYtpp, GSNt2pp, LDH_D, UREAtpp
1365	-58.8846	EX_succ_e	7.97599	-7.5	0.157559	7	34.9228	-10.6764	-2.79929	27.7291	9.99301	b2066, b3844, b4117, b0010, b1919, b3927, b1380	ACt2rpp, ARGDC, CYSDDS, CYTDK1, CYTDK2, FADRx, FE3Ri, FLVRx, GLYALDtpp, GLYtpp, LDH_D, UREAtpp, URIK1, URIK2
1366	-58.8846	EX_succ_e	7.97599	-7.5	0.157559	7	34.9228	-10.6764	-2.79929	27.7291	9.99301	b3844, b0010, b0590, b4115, b3628, b3927, b1380	ACt2rpp, ARGAGMt7pp, DHBSZ3FEabcpp, FADRx, FE3Ri, FEENTERabcpp, FLVRx, GALT1, GLYALDtpp, GLYtpp, LDH_D, UREAtpp
1367	-58.8846	EX_succ_e	7.97599	-7.5	0.157559	7	34.9228	-10.6764	-2.79929	27.7291	9.99301	b1241, b3844, b2784, b0010, b4115, b3927, b1380	ACt2rpp, ARGAGMt7pp, FADRx, FE3Ri, FLVRx, GLYALDtpp, GLYtpp, GTPDPK, LDH_D, UREAtpp
1368	-58.8846	EX_succ_e	7.97599	-7.5	0.157559	7	34.9228	-10.6764	-2.79929	27.7291	9.99301	b3844, b2784, b4117, b0010, b3927, b1380, b1193	ACt2rpp, ARGDC, FADRx, FE3Ri, FLVRx, GLYALDtpp, GLYtpp, GTPDPK, LDH_D, UREAtpp
1369	-58.8846	EX_succ_e	7.97599	-7.5	0.157559	7	34.9228	-10.6764	-2.79929	27.7291	9.99301	b0928, b3844, b4117, b0010, b2200, b3927, b1380	ACt2rpp, ARGDC, CYSTA, FADRx, FE3Ri, FLVRx, GLYALDtpp, GLYtpp, LDH_D, PHEMEabcpp, UREAtpp
1370	-58.8846	EX_succ_e	7.97599	-7.5	0.157559	7	34.9228	-10.6764	-2.79929	27.7291	9.99301	b3844, b4117, b0010, b3927, b1380, b4141, b4104	ACt2rpp, ARGDC, FADRx, FE3Ri, FLVRx, GLYALDtpp, GLYtpp, ILEt3pp, LDH_D, MEPNabcpp, UREAtpp
1371	-58.8846	EX_succ_e	7.97599	-7.5	0.157559	7	34.9228	-10.6764	-2.79929	27.7291	9.99301	b3844, b4117, b0010, b3927, b1380, b4141, b4159	ACt2rpp, ARGDC, FADRx, FE3Ri, FLVRx, GLYALDtpp, GLYtpp, ILEt3pp, LDH_D, UREAtpp
1372	-58.8846	EX_succ_e	7.97599	-7.5	0.157559	7	34.9228	-10.6764	-2.79929	27.7291	9.99301	b1588, b3844, b4117, b0010, b3927, b1380, b0404	ACt2rpp, ARGDC, FA100ACPHi, FA120ACPHi, FA140ACPHi, FA141ACPHi, FA160ACPHi, FA161ACPHi, FA80ACPHi, FADRx, FE3Ri, FLVRx, GLYALDtpp, GLYtpp, LDH_D, SELR, UREAtpp
1373	-58.8846	EX_succ_e	7.97599	-7.5	0.157559	7	34.9228	-10.6764	-2.79929	27.7291	9.99301	b3844, b0121, b0010, b4115, b2148, b3927, b1380	ACt2rpp, APCS, ARGAGMt7pp, FADRx, FE3Ri, FLVRx, GLCabcpp, GLYALDtpp, GLYtpp, LDH_D, SPMS, UREAtpp
1374	-58.8846	EX_succ_e	7.97599	-7.5	0.157559	7	34.9228	-10.6764	-2.79929	27.7291	9.99301	b3844, b3590, b0010, b2406, b4115, b3927, b1380	ACt2rpp, ADNt2pp_copy2, ARGAGMt7pp, CYTDt2pp_copy2, FADRx, FE3Ri, FLVRx, GLYALDtpp, GLYtpp, LDH_D, THMDt2pp_copy2, UREAtpp, URIt2pp_copy2, XTSNt2rpp
1375	-58.8846	EX_succ_e	7.97599	-7.5	0.157559	7	34.9228	-10.6764	-2.79929	27.7291	9.99301	b2436, b3844, b4117, b0010, b3927, b1380, b2683	ACt2rpp, ARGDC, CPPPGO, FADRx, FE3Ri, FLVRx, GLYALDtpp, GLYtpp, LDH_D, UREAtpp
1376	-58.8846	EX_succ_e	7.97599	-7.5	0.157559	7	34.9228	-10.6764	-2.79929	27.7291	9.99301	b3844, b4117, b0505, b0010, b3632, b3927, b1380	ACt2rpp, ARGDC, FADRx, FE3Ri, FLVRx, GLYALDtpp, GLYtpp, HEPT3, LDH_D, UGLYCH, UREAtpp
1377	-58.8846	EX_succ_e	7.97599	-7.5	0.157559	7	34.9228	-10.6764	-2.79929	27.7291	9.99301	b3844, b4117, b0010, b2131, b1119, b3927, b1380	ACGAMK, ACt2rpp, ARGDC, CHLabcpp, FADRx, FE3Ri, FLVRx, GLYALDtpp, GLYtpp, LDH_D, UREAtpp
1378	-58.8846	EX_succ_e	7.97599	-7.5	0.157559	7	34.9228	-10.6764	-2.79929	27.7291	9.99301	b3844, b4117, b3619, b1236, b0010, b3927, b1380	ACt2rpp, AGMHE, ARGDC, FADRx, FE3Ri, FLVRx, GALUi, GLYALDtpp, GLYtpp, LDH_D, UREAtpp
1379	-58.8846	EX_succ_e	7.97599	-7.5	0.157559	7	34.9228	-10.6764	-2.79929	27.7291	9.99301	b3844, b4117, b0010, b2180, b3927, b1380, b2240	ACt2rpp, ARGDC, FADRx, FE3Ri, FLVRx, GLYALDtpp, GLYC3Pt6pp, GLYtpp, LDH_D, UREAtpp
1380	-58.8846	EX_succ_e	7.97599	-7.5	0.157559	7	34.9228	-10.6764	-2.79929	27.7291	9.99301	b3617, b3844, b0010, b4115, b3927, b1380, b2262	ACt2rpp, ARGAGMt7pp, DHNCOAS, FADRx, FE3Ri, FLVRx, GLYALDtpp, GLYAT, GLYtpp, LDH_D, UREAtpp
1381	-58.8846	EX_succ_e	7.97599	-7.5	0.157559	7	34.9228	-10.6764	-2.79929	27.7291	9.99301	b3844, b3429, b4117, b0010, b3927, b1380, b2262	ACt2rpp, ARGDC, DHNCOAS, FADRx, FE3Ri, FLVRx, GLCS1, GLYALDtpp, GLYtpp, LDH_D, UREAtpp
1382	-58.8846	EX_succ_e	7.97599	-7.5	0.157559	7	34.9228	-10.6764	-2.79929	27.7291	9.99301	b3844, b3945, b0010, b4115, b1443, b3927, b1380	ACt2rpp, ALR4x, APPLDHr, ARGAGMt7pp, FADRx, FE3Ri, FLVRx, GLYALDtpp, GLYCDx, GLYtpp, LALDO2x, LDH_D, UREAtpp
1383	-58.8846	EX_succ_e	7.97599	-7.5	0.157559	7	34.9228	-10.6764	-2.79929	27.7291	9.99301	b1398, b3844, b0010, b4115, b4265, b3927, b1380	5DGLCNt2rpp, ACt2rpp, ARGAGMt7pp, FADRx, FE3Ri, FLVRx, GLYALDtpp, GLYtpp, IDONt2rpp, LDH_D, PACCOAL, UREAtpp
1384	-58.8846	EX_succ_e	7.97599	-7.5	0.157559	7	34.9228	-10.6764	-2.79929	27.7291	9.99301	b3844, b0010, b4115, b1857, b3927, b1380, b0508	ACt2rpp, ARGAGMt7pp, FADRx, FE3Ri, FLVRx, GLYALDtpp, GLYtpp, HPYRI, LDH_D, UREAtpp, ZNabcpp
1385	-58.8846	EX_succ_e	7.97599	-7.5	0.157559	7	34.9228	-10.6764	-2.79929	27.7291	9.99301	b3844, b0010, b4115, b0019, b3927, b1380, b2682	ACt2rpp, ARGAGMt7pp, FADRx, FE3Ri, FLVRx, GLYALDtpp, GLYtpp, LDH_D, NAt3_2pp, UREAtpp
1386	-58.8846	EX_succ_e	7.97599	-7.5	0.157559	7	34.9228	-10.6764	-2.79929	27.7291	9.99301	b3844, b4117, b0010, b3927, b3028, b1380, b2262	ACt2rpp, ARGDC, DHNCOAS, FADRx, FE3Ri, FLVRx, GLYALDtpp, GLYtpp, LDH_D, NADPHQR2, NADPHQR3, NADPHQR4, UREAtpp
1387	-58.8846	EX_succ_e	7.97599	-7.5	0.157559	7	34.9228	-10.6764	-2.79929	27.7291	9.99301	b3844, b4117, b0010, b2423, b3212, b3927, b1380	ACt2rpp, ARGDC, FADRx, FE3Ri, FLVRx, GLUSy, GLYALDtpp, GLYtpp, LDH_D, SELabcpp, SLNTabcpp, TSULabcpp, UREAtpp
1388	-58.8846	EX_succ_e	7.97599	-7.5	0.157559	7	34.9228	-10.6764	-2.79929	27.7291	9.99301	b3844, b2800, b0010, b4115, b3213, b3927, b1380	ACt2rpp, ARGAGMt7pp, FADRx, FE3Ri, FLVRx, GLUSy, GLYALDtpp, GLYtpp, LDH_D, UREAtpp
1389	-58.8846	EX_succ_e	7.97599	-7.5	0.157559	7	34.9228	-10.6764	-2.79929	27.7291	9.99301	b3844, b4117, b0010, b0862, b3927, b1380, b0722	ACt2rpp, ARGDC, FADRx, FE3Ri, FLVRx, GLYALDtpp, GLYtpp, LDH_D, SUCDi, UREAtpp
1390	-58.8846	EX_succ_e	7.97599	-7.5	0.157559	7	34.9228	-10.6764	-2.79929	27.7291	9.99301	b3844, b4117, b0010, b3580, b3927, b1380, b3918	3KGK, ACt2rpp, ARGDC, CDAPPA120, CDAPPA140, CDAPPA141, CDAPPA160, CDAPPA161, CDAPPA180, CDAPPA181, FADRx, FE3Ri, FLVRx, GLYALDtpp, GLYtpp, LDH_D, UREAtpp
1391	-58.8846	EX_succ_e	7.97599	-7.5	0.157559	7	34.9228	-10.6764	-2.79929	27.7291	9.99301	b1613, b3844, b0010, b4115, b3502, b3927, b1380	ACt2rpp, ARGAGMt7pp, ASO3t8pp, FADRx, FE3Ri, FLVRx, GLYALDtpp, GLYtpp, LDH_D, MAN6PI, UREAtpp
1392	-58.8846	EX_succ_e	7.97599	-7.5	0.157559	7	34.9228	-10.6764	-2.79929	27.7291	9.99301	b3844, b0010, b4115, b0654, b1606, b3927, b1380	ACt2rpp, ARGAGMt7pp, ASPabcpp, DHMPTR, FADRx, FE3Ri, FLVRx, GLUabcpp, GLYALDtpp, GLYtpp, LDH_D, UREAtpp
1393	-58.8846	EX_succ_e	7.97599	-7.5	0.157559	7	34.9228	-10.6764	-2.79929	27.7291	9.99301	b0902, b3844, b0010, b4115, b2947, b3927, b1380	ACt2rpp, ARGAGMt7pp, FADRx, FE3Ri, FLVRx, GLYALDtpp, GLYtpp, GTHS, LDH_D, OBTFL, UREAtpp
1394	-58.8846	EX_succ_e	7.97599	-7.5	0.157559	7	34.9228	-10.6764	-2.79929	27.7291	9.99301	b3844, b0010, b4115, b4265, b1186, b3927, b1380	5DGLCNt2rpp, ACt2rpp, ARGAGMt7pp, FADRx, FE3Ri, FLVRx, GLYALDtpp, GLYtpp, IDONt2rpp, LDH_D, NAt3_1p5pp, UREAtpp
1395	-58.8846	EX_succ_e	7.97599	-7.5	0.157559	7	34.9228	-10.6764	-2.79929	27.7291	9.99301	b3844, b0010, b2406, b4115, b4242, b3927, b1380	ACt2rpp, ADNt2pp_copy2, ARGAGMt7pp, CYTDt2pp_copy2, FADRx, FE3Ri, FLVRx, GLYALDtpp, GLYtpp, LDH_D, MG2uabcpp, THMDt2pp_copy2, UREAtpp, URIt2pp_copy2, XTSNt2rpp
1396	-58.8846	EX_succ_e	7.97599	-7.5	0.157559	7	34.9228	-10.6764	-2.79929	27.7291	9.99301	b0160, b3844, b4117, b0010, b3927, b1380, b0432	ACt2rpp, ARGDC, CYTBO3_4pp, FADRx, FE3Ri, FLVRx, GLYALDtpp, GLYtpp, LDH_D, NTPTP1, NTPTP2, UREAtpp
1397	-58.8846	EX_succ_e	7.97599	-7.5	0.157559	7	34.9228	-10.6764	-2.79929	27.7291	9.99301	b1261, b3844, b4117, b0010, b1539, b3927, b1380	ACt2rpp, ARGDC, ATHRDHr, DSERDHr, FADRx, FE3Ri, FLVRx, GLYALDtpp, GLYtpp, LDH_D, LSERDHr, TRPS1, TRPS2, TRPS3, UREAtpp
1398	-58.8846	EX_succ_e	7.97599	-7.5	0.157559	7	34.9228	-10.6764	-2.79929	27.7291	9.99301	b3844, b4117, b0937, b3791, b0010, b3927, b1380	ACt2rpp, ARGDC, FADRx, FE3Ri, FLVRx, FMNRx, GLYALDtpp, GLYtpp, LDH_D, TDPAGTA, UREAtpp
1399	-58.8846	EX_succ_e	7.97599	-7.5	0.157559	7	34.9228	-10.6764	-2.79929	27.7291	9.99301	b3844, b0675, b0010, b4115, b3927, b1380, b0968	ACt2rpp, APH120, APH140, APH141, APH160, APH161, APH180, APH181, ARGAGMt7pp, FADRx, FE3Ri, FLVRx, GLYALDtpp, GLYtpp, LDH_D, UREAtpp
1400	-58.8846	EX_succ_e	7.97599	-7.5	0.157559	7	34.9228	-10.6764	-2.79929	27.7291	9.99301	b3844, b4117, b0010, b4067, b3927, b1380, b0355	ACt2rpp, ACt4pp, ARGDC, FADRx, FE3Ri, FLVRx, GLYALDtpp, GLYCLTt4pp, GLYtpp, LDH_D, UREAtpp
1401	-58.8846	EX_succ_e	7.97599	-7.5	0.157559	7	34.9228	-10.6764	-2.79929	27.7291	9.99301	b3844, b0010, b4115, b2866, b1441, b3927, b1380	ACt2rpp, ARGAGMt7pp, FADRx, FE3Ri, FLVRx, GLYALDtpp, GLYtpp, HXAND, LDH_D, UREAtpp, XAND
1402	-58.8846	EX_succ_e	7.97599	-7.5	0.157559	7	34.9228	-10.6764	-2.79929	27.7291	9.99301	b3844, b0368, b4117, b0403, b0010, b3927, b1380	ACt2rpp, ARGDC, FADRx, FE3Ri, FLVRx, GLYALDtpp, GLYtpp, LDH_D, MLTG1, MLTG2, MLTG3, MLTG4, MLTG5, TAUDO, UREAtpp
1403	-58.8846	EX_succ_e	7.97599	-7.5	0.157559	7	34.9228	-10.6764	-2.79929	27.7291	9.99301	b3844, b4117, b4388, b0010, b3567, b3927, b1380	ACt2rpp, ARGDC, FADRx, FE3Ri, FLVRx, GLYALDtpp, GLYtpp, LDH_D, PSP_L, UREAtpp, XYLabcpp
1404	-58.8846	EX_succ_e	7.97599	-7.5	0.157559	7	34.9228	-10.6764	-2.79929	27.7291	9.99301	b3844, b2799, b0010, b4115, b0040, b3927, b1380	ACt2rpp, ARGAGMt7pp, CRNt7pp, CRNt8pp, FADRx, FE3Ri, FLVRx, GLYALDtpp, GLYtpp, LCARS, LDH_D, UREAtpp
1405	-58.8846	EX_succ_e	7.97599	-7.5	0.157559	7	34.9228	-10.6764	-2.79929	27.7291	9.99301	b3430, b3844, b4117, b0010, b3927, b1380, b1684	ACt2rpp, ARGDC, FADRx, FE3Ri, FLVRx, GLGC, GLYALDtpp, GLYtpp, LDH_D, S2FE2ST, S4FE4ST, UREAtpp
1406	-58.8846	EX_succ_e	7.97599	-7.5	0.157559	7	34.9228	-10.6764	-2.79929	27.7291	9.99301	b3844, b0010, b3567, b4115, b3927, b1380, b1387	ACt2rpp, ARGAGMt7pp, FADRx, FE3Ri, FLVRx, GLYALDtpp, GLYtpp, LDH_D, OXCOAHDH, UREAtpp, XYLabcpp
1407	-58.8846	EX_succ_e	7.97599	-7.5	0.157559	7	34.9228	-10.6764	-2.79929	27.7291	9.99301	b3500, b3844, b4117, b0010, b3127, b3927, b1380	ACt2rpp, ARGDC, FADRx, FE3Ri, FLVRx, GLYALDtpp, GLYtpp, GTHOr, LDH_D, UREAtpp
1408	-58.8846	EX_succ_e	7.97599	-7.5	0.157559	7	34.9228	-10.6764	-2.79929	27.7291	9.99301	b1676, b3844, b0010, b4115, b3725, b3927, b1380	ACt2rpp, ARGAGMt7pp, FADRx, FE3Ri, FLVRx, GLYALDtpp, GLYtpp, LDH_D, PIuabcpp, UREAtpp
1409	-58.8846	EX_succ_e	7.97599	-7.5	0.157559	7	34.9228	-10.6764	-2.79929	27.7291	9.99301	b3844, b4117, b0010, b3927, b2146, b1380, b1592	ACt2rpp, ARGDC, CLtipp, DURADx, FADRx, FE3Ri, FLVRx, GLYALDtpp, GLYtpp, LDH_D, UREAtpp
1410	-58.8846	EX_succ_e	7.97599	-7.5	0.157559	7	34.9228	-10.6764	-2.79929	27.7291	9.99301	b3844, b3223, b0010, b4115, b3927, b1380, b2467	ACt2rpp, AMANAPEr, ARGAGMt7pp, FADRx, FE3Ri, FLVRx, GDPMNP, GLYALDtpp, GLYtpp, LDH_D, UREAtpp
1411	-58.8846	EX_succ_e	7.97599	-7.5	0.157559	7	34.9228	-10.6764	-2.79929	27.7291	9.99301	b3844, b0010, b4115, b1246, b3927, b1380, b2467	ACt2rpp, ARGAGMt7pp, FADRx, FE3Ri, FLVRx, GDPMNP, GLYALDtpp, GLYtpp, LDH_D, UREAtpp
1412	-58.8846	EX_succ_e	7.97599	-7.5	0.157559	7	34.9228	-10.6764	-2.79929	27.7291	9.99301	b3844, b4117, b0010, b4071, b3927, b1380, b1483	ACt2rpp, ARGDC, FADRx, FE3Ri, FLVRx, GLYALDtpp, GLYtpp, LDH_D, NTRIR3pp, NTRIR4pp, UREAtpp
1413	-58.8846	EX_succ_e	7.97599	-7.5	0.157559	7	34.9228	-10.6764	-2.79929	27.7291	9.99301	b3844, b4117, b1636, b0010, b4073, b3927, b1380	ACt2rpp, ARGDC, FADRx, FE3Ri, FLVRx, GLYALDtpp, GLYtpp, LDH_D, NTRIR3pp, NTRIR4pp, UREAtpp
1414	-58.8846	EX_succ_e	7.97599	-7.5	0.157559	7	34.9228	-10.6764	-2.79929	27.7291	9.99301	b3844, b4117, b0010, b4072, b2487, b3927, b1380	ACt2rpp, ARGDC, FADRx, FE3Ri, FLVRx, GLYALDtpp, GLYtpp, LDH_D, NTRIR3pp, NTRIR4pp, UREAtpp
1415	-58.8846	EX_succ_e	7.97599	-7.5	0.157559	7	34.9228	-10.6764	-2.79929	27.7291	9.99301	b1261, b3844, b4117, b0010, b3927, b1380, b3447	ACt2rpp, ARGDC, FADRx, FE3Ri, FLVRx, GLYALDtpp, GLYtpp, GTHRDHpp, LDH_D, TRPS1, TRPS2, TRPS3, UREAtpp
1416	-58.8846	EX_succ_e	7.97599	-7.5	0.157559	7	34.9228	-10.6764	-2.79929	27.7291	9.99301	b0963, b3844, b4117, b0010, b0019, b3927, b1380	ACt2rpp, ARGDC, FADRx, FE3Ri, FLVRx, GLYALDtpp, GLYtpp, LDH_D, MGSA, NAt3_2pp, UREAtpp
1417	-58.8846	EX_succ_e	7.97599	-7.5	0.157559	7	34.9228	-10.6764	-2.79929	27.7291	9.99301	b3844, b3091, b0010, b2523, b4115, b3927, b1380	ACt2rpp, ALTRH, ARGAGMt7pp, FADRx, FE3Ri, FLVRx, GLYALDtpp, GLYtpp, LDH_D, UREAtpp
1418	-58.8846	EX_succ_e	7.97599	-7.5	0.157559	7	34.9228	-10.6764	-2.79929	27.7291	9.99301	b3564, b3844, b3091, b0010, b4115, b3927, b1380	ACt2rpp, ALTRH, ARGAGMt7pp, DXYLK, FADRx, FE3Ri, FLVRx, GLYALDtpp, GLYtpp, LDH_D, UREAtpp
1419	-58.8846	EX_succ_e	7.97599	-7.5	0.157559	7	34.9228	-10.6764	-2.79929	27.7291	9.99301	b0063, b3844, b4117, b0010, b3927, b1380, b4474	ACt2rpp, ARGDC, FADRx, FE3Ri, FLVRx, FRULYSE, GLYALDtpp, GLYtpp, LDH_D, RBK_L1, UREAtpp
1420	-58.8846	EX_succ_e	7.97599	-7.5	0.157559	7	34.9228	-10.6764	-2.79929	27.7291	9.99301	b3844, b4117, b0010, b2423, b3927, b1380, b3059	ACt2rpp, APG3PAT120, APG3PAT140, APG3PAT141, APG3PAT160, APG3PAT161, APG3PAT180, APG3PAT181, ARGDC, FADRx, FE3Ri, FLVRx, GLYALDtpp, GLYtpp, LDH_D, SELabcpp, SLNTabcpp, TSULabcpp, UREAtpp
1421	-58.8846	EX_succ_e	7.97599	-7.5	0.157559	7	34.9228	-10.6764	-2.79929	27.7291	9.99301	b3844, b0010, b4115, b4087, b3927, b1380, b3059	ACt2rpp, ALLabcpp, APG3PAT120, APG3PAT140, APG3PAT141, APG3PAT160, APG3PAT161, APG3PAT180, APG3PAT181, ARGAGMt7pp, FADRx, FE3Ri, FLVRx, GLYALDtpp, GLYtpp, LDH_D, UREAtpp
1422	-58.8846	EX_succ_e	7.97599	-7.5	0.157559	7	34.9228	-10.6764	-2.79929	27.7291	9.99301	b0871, b3844, b0394, b0010, b4115, b3927, b1380	ACt2rpp, ARGAGMt7pp, FADRx, FE3Ri, FLVRx, GLYALDtpp, GLYtpp, HEX7, LDH_D, POX, UREAtpp
1423	-58.8846	EX_succ_e	7.97599	-7.5	0.157559	7	34.9228	-10.6764	-2.79929	27.7291	9.99301	b2040, b3844, b4117, b2903, b0010, b3927, b1380	ACt2rpp, ARGDC, FADRx, FE3Ri, FLVRx, GLYALDtpp, GLYCL, GLYtpp, LDH_D, TDPDRR, UREAtpp
1424	-58.8846	EX_succ_e	7.97599	-7.5	0.157559	7	34.9228	-10.6764	-2.79929	27.7291	9.99301	b3844, b4117, b2498, b0010, b1991, b3927, b1380	ACt2rpp, ARGDC, FADRx, FE3Ri, FLVRx, GLYALDtpp, GLYtpp, LDH_D, NNDMBRT, UPPRT, UREAtpp
1425	-58.8846	EX_succ_e	7.97599	-7.5	0.157559	7	34.9228	-10.6764	-2.79929	27.7291	9.99301	b3844, b4117, b0010, b4055, b3927, b1380, b2175	4PCPpp, ACt2rpp, AGM4PCPpp, ARGDC, FADRx, FE3Ri, FLVRx, GLYALDtpp, GLYtpp, LDH_D, TYRPpp, UREAtpp
1426	-58.8846	EX_succ_e	7.97599	-7.5	0.157559	7	34.9228	-10.6764	-2.79929	27.7291	9.99301	b3844, b4117, b2802, b0010, b0621, b3927, b1380	ACt2rpp, ARABDI, ARGDC, FADRx, FCI, FE3Ri, FLVRx, GLYALDtpp, GLYtpp, LDH_D, UREAtpp
1427	-58.8846	EX_succ_e	7.97599	-7.5	0.157559	7	34.9228	-10.6764	-2.79929	27.7291	9.99301	b3844, b0010, b4115, b3927, b1380, b0494, b0968	ACt2rpp, APH120, APH140, APH141, APH160, APH161, APH180, APH181, ARGAGMt7pp, FADRx, FE3Ri, FLVRx, GLYALDtpp, GLYtpp, LDH_D, LPLIPAL1A120pp, LPLIPAL1A140pp, LPLIPAL1A141pp, LPLIPAL1A160pp, LPLIPAL1A161pp, LPLIPAL1A180pp, LPLIPAL1A181pp, LPLIPAL1E120pp, LPLIPAL1E140pp, LPLIPAL1E141pp, LPLIPAL1E160pp, LPLIPAL1E161pp, LPLIPAL1E180pp, LPLIPAL1E181pp, LPLIPAL1G120pp, LPLIPAL1G140pp, LPLIPAL1G141pp, LPL…
1428	-58.8846	EX_succ_e	7.97599	-7.5	0.157559	7	34.9228	-10.6764	-2.79929	27.7291	9.99301	b1849, b3844, b4117, b0010, b3654, b3927, b1380	ACt2rpp, ARGDC, FADRx, FE3Ri, FLVRx, GART, GLYALDtpp, GLYtpp, GUAt2pp, LDH_D, UREAtpp
1429	-58.8846	EX_succ_e	7.97599	-7.5	0.157559	7	34.9228	-10.6764	-2.79929	27.7291	9.99301	b3844, b4117, b2903, b0010, b3927, b1380, b0693	ACt2rpp, ARGDC, FADRx, FE3Ri, FLVRx, GLYALDtpp, GLYCL, GLYtpp, LDH_D, UREAtpp
1430	-58.8846	EX_succ_e	7.97599	-7.5	0.157559	7	34.9228	-10.6764	-2.79929	27.7291	9.99301	b3844, b4117, b2903, b0010, b4035, b3927, b1380	14GLUCANabcpp, ACt2rpp, ARGDC, FADRx, FE3Ri, FLVRx, GLYALDtpp, GLYCL, GLYtpp, LDH_D, MALTHXabcpp, MALTPTabcpp, MALTTRabcpp, MALTTTRabcpp, MALTabcpp, UREAtpp
1431	-58.8846	EX_succ_e	7.97599	-7.5	0.157559	7	34.9228	-10.6764	-2.79929	27.7291	9.99301	b0125, b3844, b4117, b2903, b0010, b3927, b1380	ACt2rpp, ARGDC, FADRx, FE3Ri, FLVRx, GLYALDtpp, GLYCL, GLYtpp, LDH_D, UREAtpp
1432	-58.8846	EX_succ_e	7.97599	-7.5	0.157559	7	34.9228	-10.6764	-2.79929	27.7291	9.99301	b3844, b4117, b2905, b0010, b2429, b3927, b1380	ACMUMptspp, ACt2rpp, ARGDC, FADRx, FE3Ri, FLVRx, GLYALDtpp, GLYCL, GLYtpp, LDH_D, SUCptspp, UREAtpp
1433	-58.8846	EX_succ_e	7.97599	-7.5	0.157559	7	34.9228	-10.6764	-2.79929	27.7291	9.99301	b1095, b3844, b0010, b4115, b3909, b3927, b1380	3OAS181, ACt2rpp, ARGAGMt7pp, DDGLCNt2rpp, FADRx, FE3Ri, FLVRx, GLYALDtpp, GLYtpp, LDH_D, UREAtpp
1434	-58.8846	EX_succ_e	7.97599	-7.5	0.157559	7	34.9228	-10.6764	-2.79929	27.7291	9.99301	b3844, b0758, b3790, b0010, b4115, b3927, b1380	ACt2rpp, ARGAGMt7pp, FADRx, FE3Ri, FLVRx, GLYALDtpp, GLYtpp, LDH_D, TDPADGAT, UGLT, UREAtpp
1435	-58.8846	EX_succ_e	7.97599	-7.5	0.157559	7	34.9228	-10.6764	-2.79929	27.7291	9.99301	b0928, b3844, b0010, b4115, b3927, b1380, b1012	ACt2rpp, ARGAGMt7pp, CYSTA, FADRx, FE3Ri, FLVRx, GLYALDtpp, GLYtpp, LDH_D, PYROX, UREAtpp
1436	-58.8846	EX_succ_e	7.97599	-7.5	0.157559	7	34.9228	-10.6764	-2.79929	27.7291	9.99301	b3844, b4117, b0010, b2818, b3927, b1380, b4095	ACGS, ACt2rpp, ARGDC, FADRx, FE3Ri, FLVRx, GLYALDtpp, GLYtpp, LDH_D, RPNTPH, UREAtpp
1437	-58.8846	EX_succ_e	7.97599	-7.5	0.157559	7	34.9228	-10.6764	-2.79929	27.7291	9.99301	b3844, b3385, b0010, b4115, b3654, b3927, b1380	ACt2rpp, ARGAGMt7pp, FADRx, FE3Ri, FLVRx, GLYALDtpp, GLYtpp, GUAt2pp, LDH_D, PGLYCP, UREAtpp
1438	-58.8846	EX_succ_e	7.97599	-7.5	0.157559	7	34.9228	-10.6764	-2.79929	27.7291	9.99301	b3844, b4117, b0010, b3779, b4085, b3927, b1380	ACt2rpp, ALLULPE, ARGDC, FADRx, FE3Ri, FLVRx, GLYALDtpp, GLYtpp, GTPDPDP, LDH_D, UREAtpp
1439	-58.8846	EX_succ_e	7.97599	-7.5	0.157559	7	34.9228	-10.6764	-2.79929	27.7291	9.99301	b2464, b3844, b0010, b4115, b3927, b1380, b2923	ACt2rpp, ARGAGMt7pp, ARGt3pp, FADRx, FE3Ri, FLVRx, GLYALDtpp, GLYtpp, LDH_D, UREAtpp
1440	-58.8846	EX_succ_e	7.97599	-7.5	0.157559	7	34.9228	-10.6764	-2.79929	27.7291	9.99301	b3844, b4117, b0010, b3927, b3821, b1380, b3930	ACt2rpp, ARGDC, DHNAOT4, FADRx, FE3Ri, FLVRx, GLYALDtpp, GLYtpp, LDH_D, PLIPA1A120pp, PLIPA1A140pp, PLIPA1A141pp, PLIPA1A160pp, PLIPA1A161pp, PLIPA1A180pp, PLIPA1A181pp, PLIPA1E120pp, PLIPA1E140pp, PLIPA1E141pp, PLIPA1E160pp, PLIPA1E161pp, PLIPA1E180pp, PLIPA1E181pp, PLIPA1G120pp, PLIPA1G140pp, PLIPA1G141pp, PLIPA1G160pp, PLIPA1G161pp, PLIPA1G180pp, PLIPA1G181pp, PLIPA2A120pp, PLIPA2A140pp, PLIPA…
1441	-58.8846	EX_succ_e	7.97599	-7.5	0.157559	7	34.9228	-10.6764	-2.79929	27.7291	9.99301	b1732, b3844, b0010, b4115, b2663, b3927, b1380	ABUTt2pp, ACt2rpp, ARGAGMt7pp, FADRx, FE3Ri, FLVRx, GLYALDtpp, GLYtpp, LDH_D, UREAtpp
1442	-58.8846	EX_succ_e	7.97599	-7.5	0.157559	7	34.9228	-10.6764	-2.79929	27.7291	9.99301	b3844, b4117, b0010, b3927, b1380, b1813, b1389	ACt2rpp, ARGDC, FADRx, FE3Ri, FLVRx, GLYALDtpp, GLYtpp, HPYRP, LDH_D, PACCOAE, UREAtpp
1443	-58.8846	EX_succ_e	7.97599	-7.5	0.157559	7	34.9228	-10.6764	-2.79929	27.7291	9.99301	b3844, b0595, b0010, b4115, b3212, b3927, b1380	ACt2rpp, ARGAGMt7pp, FADRx, FE3Ri, FLVRx, GLUSy, GLYALDtpp, GLYtpp, ICHORT, LDH_D, UREAtpp
1444	-58.8846	EX_succ_e	7.97599	-7.5	0.157559	7	34.9228	-10.6764	-2.79929	27.7291	9.99301	b3844, b4117, b0010, b3927, b0622, b3432, b1380	ACt2rpp, ARGDC, FADRx, FE3Ri, FLVRx, GLBRAN2, GLYALDtpp, GLYtpp, LDH_D, LIPAHT2ex, LIPAHTex, UREAtpp
1445	-58.8846	EX_succ_e	7.97599	-7.5	0.157559	7	34.9228	-10.6764	-2.79929	27.7291	9.99301	b3844, b3565, b0010, b4115, b1443, b3927, b1380	ACt2rpp, ARGAGMt7pp, FADRx, FE3Ri, FLVRx, GLYALDtpp, GLYtpp, LDH_D, UREAtpp, XYLI1, XYLI2
1446	-58.8846	EX_succ_e	7.97599	-7.5	0.157559	7	34.9228	-10.6764	-2.79929	27.7291	9.99301	b3844, b4117, b0010, b1102, b3927, b3432, b1380	ACt2rpp, ARGDC, CPGNtonex, FADRx, FE3Ri, FLVRx, GLBRAN2, GLYALDtpp, GLYtpp, LDH_D, UREAtpp
1447	-58.8846	EX_succ_e	7.97599	-7.5	0.157559	7	34.9228	-10.6764	-2.79929	27.7291	9.99301	b3844, b0010, b4115, b3005, b3927, b1380, b1276	ACt2rpp, ADOCBLtonex, ARGAGMt7pp, CBItonex, CBL1tonex, CPGNtonex, FADRx, FE3DCITtonex, FE3DHBZStonex, FE3HOXtonex, FE3Ri, FECRMtonex, FEENTERtonex, FEOXAMtonex, FLVRx, GLYALDtpp, GLYtpp, LDH_D, UREAtpp
1448	-58.8846	EX_succ_e	7.97599	-7.5	0.157559	7	34.9228	-10.6764	-2.79929	27.7291	9.99301	b0351, b3844, b0010, b4115, b3005, b3927, b1380	ACt2rpp, ADOCBLtonex, ARGAGMt7pp, CBItonex, CBL1tonex, CPGNtonex, FADRx, FE3DCITtonex, FE3DHBZStonex, FE3HOXtonex, FE3Ri, FECRMtonex, FEENTERtonex, FEOXAMtonex, FLVRx, GLYALDtpp, GLYtpp, LDH_D, UREAtpp
1449	-58.8846	EX_succ_e	7.97599	-7.5	0.157559	7	34.9228	-10.6764	-2.79929	27.7291	9.99301	b3844, b4117, b0010, b3006, b3927, b1380, b4476	ACt2rpp, ADOCBLtonex, ARGDC, CBItonex, CBL1tonex, CPGNtonex, FADRx, FE3DCITtonex, FE3DHBZStonex, FE3HOXtonex, FE3Ri, FECRMtonex, FEENTERtonex, FEOXAMtonex, FLVRx, GLYALDtpp, GLYtpp, LDH_D, UREAtpp
1450	-58.8846	EX_succ_e	7.97599	-7.5	0.157559	7	34.9228	-10.6764	-2.79929	27.7291	9.99301	b0243, b3844, b0010, b2307, b4115, b3927, b1380	ACt2rpp, ARGAGMt7pp, FADRx, FE3Ri, FLVRx, G5SD, GLYALDtpp, GLYtpp, HISabcpp, LDH_D, LYSabcpp, ORNabcpp, UREAtpp
1451	-58.8846	EX_succ_e	7.97599	-7.5	0.157559	7	34.9228	-10.6764	-2.79929	27.7291	9.99301	b3844, b4117, b3551, b0010, b3927, b1380, b0662	ACt2rpp, ARGDC, BSORx, BSORy, FADRx, FE3Ri, FLVRx, GLYALDtpp, GLYtpp, LDH_D, OMMBLHXy, UREAtpp
1452	-58.8846	EX_succ_e	7.97599	-7.5	0.157559	7	34.9228	-10.6764	-2.79929	27.7291	9.99301	b2222, b3844, b4117, b0010, b1119, b3927, b1380	ACGAMK, ACt2rpp, ARGDC, BUTCT, FADRx, FE3Ri, FLVRx, GLYALDtpp, GLYtpp, HXCT, LDH_D, UREAtpp
1453	-58.8846	EX_succ_e	7.97599	-7.5	0.157559	7	34.9228	-10.6764	-2.79929	27.7291	9.99301	b3844, b4117, b0411, b0010, b3927, b1380, b1621	ACt2rpp, ADNtex, ARGDC, DADNtex, DCYTtex, DURItex, FADRx, FE3Ri, FLVRx, GLYALDtpp, GLYtpp, GUAtex, INStex, LDH_D, MALTptspp, UREAtpp, URItex
1454	-58.8846	EX_succ_e	7.97599	-7.5	0.157559	7	34.9228	-10.6764	-2.79929	27.7291	9.99301	b3844, b0411, b0010, b4115, b3927, b1380, b1621	ACt2rpp, ADNtex, ARGAGMt7pp, DADNtex, DCYTtex, DURItex, FADRx, FE3Ri, FLVRx, GLYALDtpp, GLYtpp, GUAtex, INStex, LDH_D, MALTptspp, UREAtpp, URItex
1455	-58.8846	EX_succ_e	7.97599	-7.5	0.157559	7	34.9228	-10.6764	-2.79929	27.7291	9.99301	b3844, b4117, b0010, b3927, b1380, b0269, b1771	ACt2rpp, ALR2x, ARGDC, FADRx, FE3Ri, FLVRx, GLYALDtpp, GLYtpp, LDH_D, UREAtpp
1456	-58.8846	EX_succ_e	7.97599	-7.5	0.157559	7	34.9228	-10.6764	-2.79929	27.7291	9.99301	b3844, b0010, b0932, b2676, b4115, b3927, b1380	ACt2rpp, ARGAGMt7pp, FADRx, FE3Ri, FLVRx, GLYALDtpp, GLYtpp, LDH_D, RNDR1b, RNDR2b, RNDR3b, RNDR4b, UREAtpp
1457	-58.8846	EX_succ_e	7.97599	-7.5	0.157559	7	34.9228	-10.6764	-2.79929	27.7291	9.99301	b3844, b4117, b0010, b2676, b3927, b1380, b1449	ACt2rpp, ARGDC, CURR, DHCURR, FADRx, FE3Ri, FLVRx, GLYALDtpp, GLYtpp, LDH_D, RNDR1b, RNDR2b, RNDR3b, RNDR4b, UREAtpp
1458	-58.8846	EX_succ_e	7.97599	-7.5	0.157559	7	34.9228	-10.6764	-2.79929	27.7291	9.99301	b3844, b4117, b0010, b1818, b3927, b1380, b4167	2DGLCptspp, ACMANAptspp, ACt2rpp, ARGDC, FADRx, FE3Ri, FLVRx, FRUpts2pp, GAMptspp, GLYALDtpp, GLYtpp, LDH_D, MANptspp, NADHXD, NADHXE, NADPHXD, NADPHXE, UREAtpp
1459	-58.8846	EX_succ_e	7.97599	-7.5	0.157559	7	34.9228	-10.6764	-2.79929	27.7291	9.99301	b3844, b4117, b0010, b3927, b1380, b4167, b3943	ACt2rpp, ARGDC, CYSItpp, FADRx, FE3Ri, FLVRx, GLYALDtpp, GLYtpp, LDH_D, NADHXD, NADHXE, NADPHXD, NADPHXE, UREAtpp
1460	-58.8846	EX_succ_e	7.97599	-7.5	0.157559	7	34.9228	-10.6764	-2.79929	27.7291	9.99301	b3844, b1701, b0010, b4115, b3927, b1380, b4167	ACt2rpp, ARGAGMt7pp, FADRx, FE3Ri, FLVRx, GLYALDtpp, GLYtpp, LDH_D, NADHXD, NADHXE, NADPHXD, NADPHXE, UREAtpp
1461	-58.8846	EX_succ_e	7.97599	-7.5	0.157559	7	34.9228	-10.6764	-2.79929	27.7291	9.99301	b3844, b3590, b0010, b4115, b4367, b3927, b1380	ACt2rpp, ARGAGMt7pp, FADRx, FE3Ri, FEOXAMR1, FEOXAMR2, FEOXAMR3, FLVRx, GLYALDtpp, GLYtpp, LDH_D, UREAtpp
1462	-58.8846	EX_succ_e	7.97599	-7.5	0.157559	7	34.9228	-10.6764	-2.79929	27.7291	9.99301	b3844, b4117, b0010, b0311, b3927, b1380, b1514	ACt2rpp, AI2abcpp, ARGDC, CHOLD, FADRx, FE3Ri, FLVRx, GLYALDtpp, GLYtpp, LDH_D, UREAtpp
1463	-58.8846	EX_succ_e	7.97599	-7.5	0.157559	7	34.9228	-10.6764	-2.79929	27.7291	9.99301	b1855, b3844, b0010, b4115, b2703, b3927, b1380	ACt2rpp, ARGAGMt7pp, EDTXS2, EDTXS4, FADRx, FE3Ri, FLVRx, GLYALDtpp, GLYtpp, LDH_D, SBTptspp, UREAtpp
1464	-58.8846	EX_succ_e	7.97599	-7.5	0.157559	7	34.9228	-10.6764	-2.79929	27.7291	9.99301	b1855, b3844, b2361, b0010, b4115, b3927, b1380	ACt2rpp, ARGAGMt7pp, EDTXS2, EDTXS4, FADRx, FE3Ri, FLVRx, GLYALDtpp, GLYtpp, LDH_D, UREAtpp
1465	-58.8846	EX_succ_e	7.97599	-7.5	0.157559	7	34.9228	-10.6764	-2.79929	27.7291	9.99301	b3844, b4117, b0010, b0592, b3728, b3927, b1380	ACt2rpp, ARGDC, DHBSZ3FEabcpp, FADRx, FE3Ri, FEENTERabcpp, FLVRx, GLYALDtpp, GLYtpp, LDH_D, PIuabcpp, UREAtpp
1466	-58.8846	EX_succ_e	7.97599	-7.5	0.157559	7	34.9228	-10.6764	-2.79929	27.7291	9.99301	b3844, b4117, b0615, b0010, b3927, b1380, b0662	ACt2rpp, ARGDC, CITL, FADRx, FE3Ri, FLVRx, GLYALDtpp, GLYtpp, LDH_D, OMMBLHXy, UREAtpp
1467	-58.8846	EX_succ_e	7.97599	-7.5	0.157559	7	34.9228	-10.6764	-2.79929	27.7291	9.99301	b3844, b4117, b0596, b0010, b3927, b1380, b3546	ACt2rpp, ARGDC, DHBD, FADRx, FE3Ri, FLVRx, GLYALDtpp, GLYtpp, LDH_D, PETNT161pp, PETNT181pp, UREAtpp
1468	-58.8846	EX_succ_e	7.97599	-7.5	0.157559	7	34.9228	-10.6764	-2.79929	27.7291	9.99301	b3844, b2029, b0485, b0010, b4115, b3927, b1380	ACt2rpp, ARGAGMt7pp, FADRx, FE3Ri, FLVRx, GLYALDtpp, GLYtpp, GND, LDH_D, UREAtpp
1469	-58.8846	EX_succ_e	7.97599	-7.5	0.157559	7	34.9228	-10.6764	-2.79929	27.7291	9.99301	b3844, b4117, b0010, b0480, b3479, b3927, b1380	ACt2rpp, ARGDC, FADRx, FE3Ri, FLVRx, GLYALDtpp, GLYtpp, LDH_D, UACGALPpp, UACGAMPpp, UDPGALPpp, UDPGPpp, UGLCURPpp, UREAtpp
1470	-58.8846	EX_succ_e	7.97599	-7.5	0.157559	7	34.9228	-10.6764	-2.79929	27.7291	9.99301	b3844, b4117, b0010, b4055, b1927, b3927, b1380	AAMYL, ACt2rpp, ARGDC, FADRx, FE3Ri, FLVRx, GLYALDtpp, GLYtpp, LDH_D, TYRPpp, UREAtpp
1471	-58.8846	EX_succ_e	7.97599	-7.5	0.157559	7	34.9228	-10.6764	-2.79929	27.7291	9.99301	b3844, b4117, b3946, b0010, b0861, b3927, b1380	ACt2rpp, ARGDC, FADRx, FE3Ri, FLVRx, GLYALDtpp, GLYtpp, LDH_D, UREAtpp
1472	-58.8846	EX_succ_e	7.97599	-7.5	0.157559	7	34.9228	-10.6764	-2.79929	27.7291	9.99301	b3844, b4117, b0010, b1818, b0573, b3927, b1380	2DGLCptspp, ACMANAptspp, ACt2rpp, AGt3, ARGDC, CUt3, FADRx, FE3Ri, FLVRx, FRUpts2pp, GAMptspp, GLYALDtpp, GLYtpp, LDH_D, MANptspp, UREAtpp
1473	-58.8846	EX_succ_e	7.97599	-7.5	0.157559	7	34.9228	-10.6764	-2.79929	27.7291	9.99301	b3844, b4117, b0010, b2723, b3927, b1380, b3253	ACt2rpp, ARGDC, FADRx, FE3Ri, FLVRx, GLYALDtpp, GLYtpp, LDH_D, PCNO, UREAtpp
1474	-58.8846	EX_succ_e	7.97599	-7.5	0.157559	7	34.9228	-10.6764	-2.79929	27.7291	9.99301	b3844, b4117, b0010, b4138, b3927, b1380, b1474	ACt2rpp, ARGDC, FADRx, FE3Ri, FLVRx, GLYALDtpp, GLYtpp, LDH_D, UREAtpp
1475	-58.8846	EX_succ_e	7.97599	-7.5	0.157559	7	34.9228	-10.6764	-2.79929	27.7291	9.99301	b3844, b0010, b4115, b3927, b1380, b3525, b1634	ACt2rpp, ARGAGMt7pp, FADRx, FE3Ri, FLVRx, GLYALDtpp, GLYtpp, LDH_D, UREAtpp
1476	-58.8846	EX_succ_e	7.97599	-7.5	0.157559	7	34.9228	-10.6764	-2.79929	27.7291	9.99301	b4054, b3844, b4117, b0010, b3772, b3927, b1380	ACt2rpp, ARGDC, FADRx, FE3Ri, FLVRx, GLYALDtpp, GLYtpp, LDH_D, UREAtpp
1477	-58.8846	EX_succ_e	7.97599	-7.5	0.157559	7	34.9228	-10.6764	-2.79929	27.7291	9.99301	b3844, b1636, b0010, b4115, b1126, b3927, b1380	ACt2rpp, ARGAGMt7pp, FADRx, FE3Ri, FLVRx, GLYALDtpp, GLYtpp, LDH_D, UREAtpp
1478	-58.8846	EX_succ_e	7.97599	-7.5	0.157559	7	34.9228	-10.6764	-2.79929	27.7291	9.99301	b3844, b4117, b0010, b2487, b4227, b3927, b1380	ACt2rpp, ARGDC, FADRx, FE3Ri, FLVRx, GLYALDtpp, GLYtpp, LDH_D, UREAtpp
1479	-58.8846	EX_succ_e	7.97599	-7.5	0.157559	7	34.9228	-10.6764	-2.79929	27.7291	9.99301	b3844, b0010, b4115, b3927, b1380, b1619, b2682	ACt2rpp, ARGAGMt7pp, CHOLID, FADRx, FE3Ri, FLVRx, GLYALDtpp, GLYtpp, LDH_D, UREAtpp
1480	-58.8846	EX_succ_e	7.97599	-7.5	0.157559	7	34.9228	-10.6764	-2.79929	27.7291	9.99301	b0903, b3844, b4117, b0010, b0047, b3927, b1380	ACt2rpp, ARGDC, FADRx, FE3Ri, FLVRx, GLYALDtpp, GLYtpp, LDH_D, UREAtpp
1481	-58.8846	EX_succ_e	7.97599	-7.5	0.157559	7	34.9228	-10.6764	-2.79929	27.7291	9.99301	b3844, b3583, b0010, b4115, b1329, b3927, b1380	ACt2rpp, ARGAGMt7pp, FADRx, FE3Ri, FLVRx, GLYALDtpp, GLYtpp, LDH_D, UREAtpp
1482	-58.8846	EX_succ_e	7.97599	-7.5	0.157559	7	34.9228	-10.6764	-2.79929	27.7291	9.99301	b3553, b3225, b3844, b4117, b0010, b3927, b1380	2DGULRGx, 2DGULRGy, 2DGULRx, 2DGULRy, ACNML, ACt2rpp, ARGDC, DKGLCNR2x, DKGLCNR2y, FADRx, FE3Ri, FLVRx, GLYALDtpp, GLYtpp, LDH_D, UREAtpp
1483	-58.8846	EX_succ_e	7.97599	-7.5	0.157559	7	34.9228	-10.6764	-2.79929	27.7291	9.99301	b3197, b3844, b4117, b0010, b0650, b3927, b1380	ACt2rpp, ARGDC, FADRx, FE3Ri, FLVRx, GLYALDtpp, GLYtpp, LDH_D, UREAtpp
1484	-58.8846	EX_succ_e	7.97599	-7.5	0.157559	7	34.9228	-10.6764	-2.79929	27.7291	9.99301	b3844, b4117, b2787, b0010, b1761, b3927, b1380	ACt2rpp, ARGDC, FADRx, FE3Ri, FLVRx, GLYALDtpp, GLYtpp, LDH_D, UREAtpp
1485	-58.8846	EX_succ_e	7.97599	-7.5	0.157559	7	34.9228	-10.6764	-2.79929	27.7291	9.99301	b3844, b0010, b4115, b0933, b3927, b1380, b2682	ACt2rpp, ARGAGMt7pp, ETHSO3abcpp, FADRx, FE3Ri, FLVRx, GLYALDtpp, GLYtpp, LDH_D, MSO3abcpp, SULFACabcpp, UREAtpp
1486	-58.8846	EX_succ_e	7.97599	-7.5	0.157559	7	34.9228	-10.6764	-2.79929	27.7291	9.99301	b2465, b3844, b0010, b2417, b4115, b3927, b1380	ACMUMptspp, ACt2rpp, ARGAGMt7pp, FADRx, FE3Ri, FLVRx, GLYALDtpp, GLYtpp, LDH_D, MALTptspp, SUCptspp, TREptspp, UREAtpp
1487	-58.8846	EX_succ_e	7.97599	-7.5	0.157559	7	34.9228	-10.6764	-2.79929	27.7291	9.99301	b3844, b4117, b0010, b2481, b3927, b1380, b2470	ACt2rpp, ARGDC, FADRx, FE3Ri, FLVRx, GLYALDtpp, GLYtpp, LDH_D, UREAtpp
1488	-58.8846	EX_succ_e	7.97599	-7.5	0.157559	7	34.9228	-10.6764	-2.79929	27.7291	9.99301	b3844, b0010, b4115, b3603, b1002, b3927, b1380	ACt2rpp, ARGAGMt7pp, FADRx, FE3Ri, FLVRx, GAL1PPpp, GLYALDtpp, GLYtpp, LDH_D, UREAtpp
1489	-58.8846	EX_succ_e	7.97599	-7.5	0.157559	7	34.9228	-10.6764	-2.79929	27.7291	9.99301	b3844, b0010, b4115, b3927, b1380, b0418, b1113	ACt2rpp, ARGAGMt7pp, FADRx, FE3Ri, FLVRx, GLYALDtpp, GLYtpp, LDH_D, UREAtpp
1490	-58.8846	EX_succ_e	7.97599	-7.5	0.157559	7	34.9228	-10.6764	-2.79929	27.7291	9.99301	b3844, b0010, b4115, b2724, b3128, b3927, b1380	ACt2rpp, ARGAGMt7pp, FADRx, FE3Ri, FLVRx, GALCTD, GLYALDtpp, GLYtpp, LDH_D, UREAtpp
1491	-58.8846	EX_succ_e	7.97599	-7.5	0.157559	7	34.9228	-10.6764	-2.79929	27.7291	9.99301	b3844, b0010, b4115, b0755, b3927, b1380, b2794	ACt2rpp, ARGAGMt7pp, CDGR, FADRx, FE3Ri, FLVRx, GLYALDtpp, GLYtpp, LDH_D, UREAtpp
1492	-58.8846	EX_succ_e	7.97599	-7.5	0.157559	7	34.9228	-10.6764	-2.79929	27.7291	9.99301	b3844, b3940, b0010, b4115, b3927, b1380, b3493	ACt2rpp, ARGAGMt7pp, FADRx, FE3Ri, FLVRx, GLYALDtpp, GLYtpp, LDH_D, UREAtpp
1493	-58.8846	EX_succ_e	7.97599	-7.5	0.157559	7	34.9228	-10.6764	-2.79929	27.7291	9.99301	b3844, b4117, b0010, b3927, b1380, b1485, b0783	ACt2rpp, ARGDC, CPMPS, FADRx, FE3Ri, FLVRx, GLYALDtpp, GLYtpp, LDH_D, UREAtpp
1494	-58.8846	EX_succ_e	7.97599	-7.5	0.157559	7	34.9228	-10.6764	-2.79929	27.7291	9.99301	b3844, b4117, b0825, b0010, b3927, b1380, b0819	ACt2rpp, ARGDC, FADRx, FE3Ri, FLVRx, GLYALDtpp, GLYtpp, LDH_D, UREAtpp
1495	-58.8846	EX_succ_e	7.97599	-7.5	0.157559	7	34.9228	-10.6764	-2.79929	27.7291	9.99301	b3844, b4117, b0010, b1818, b1197, b3927, b1380	2DGLCptspp, ACMANAptspp, ACt2rpp, ARGDC, FADRx, FE3Ri, FLVRx, FRUpts2pp, GAMptspp, GLYALDtpp, GLYtpp, LDH_D, MANptspp, TREHpp, UREAtpp
1496	-58.8846	EX_succ_e	7.97599	-7.5	0.157559	7	34.9228	-10.6764	-2.79929	27.7291	9.99301	b3844, b4192, b0010, b4115, b3927, b1380, b1801	ACt2rpp, ARGAGMt7pp, ASCBPL, FADRx, FE3Ri, FLVRx, GLYALDtpp, GLYtpp, LDH_D, UREAtpp
1497	-58.8846	EX_succ_e	7.97599	-7.5	0.157559	7	34.9228	-10.6764	-2.79929	27.7291	9.99301	b3844, b4117, b3583, b0010, b3917, b3927, b1380	ACt2rpp, ARGDC, FADRx, FE3Ri, FLVRx, GLYALDtpp, GLYtpp, LDH_D, UREAtpp
1498	-58.8846	EX_succ_e	7.97599	-7.5	0.157559	7	34.9228	-10.6764	-2.79929	27.7291	9.99301	b2036, b3844, b4117, b0010, b3927, b1380, b0577	ACt2rpp, ARGDC, FADRx, FE3Ri, FLVRx, GLYALDtpp, GLYtpp, LDH_D, UDPGALM, UREAtpp
1499	-58.8846	EX_succ_e	7.97599	-7.5	0.157559	7	34.9228	-10.6764	-2.79929	27.7291	9.99301	b3844, b1033, b0010, b4115, b3927, b1380, b1193	ACt2rpp, ARGAGMt7pp, FADRx, FE3Ri, FLVRx, GLYALDtpp, GLYtpp, LDH_D, UREAtpp
1500	-58.8846	EX_succ_e	7.97599	-7.5	0.157559	7	34.9228	-10.6764	-2.79929	27.7291	9.99301	b3844, b4117, b0010, b0752, b3927, b1380, b3291	ACt2rpp, ARGDC, FADRx, FE3Ri, FLVRx, GLYALDtpp, GLYtpp, LDH_D, UREAtpp
1501	-58.8846	EX_succ_e	7.97599	-7.5	0.157559	7	34.9228	-10.6764	-2.79929	27.7291	9.99301	b3564, b3844, b4117, b0010, b1247, b3927, b1380	ACt2rpp, ARGDC, DXYLK, FADRx, FE3Ri, FLVRx, GLYALDtpp, GLYtpp, LDH_D, UREAtpp
1502	-58.8846	EX_succ_e	7.97599	-7.5	0.157559	7	34.9228	-10.6764	-2.79929	27.7291	9.99301	b3844, b4146, b2661, b0010, b4115, b3927, b1380	ACt2rpp, ARGAGMt7pp, FADRx, FE3Ri, FLVRx, GLYALDtpp, GLYtpp, LDH_D, LYSAM, UREAtpp
1503	-58.8846	EX_succ_e	7.97599	-7.5	0.157559	7	34.9228	-10.6764	-2.79929	27.7291	9.99301	b3844, b4117, b0010, b4485, b3927, b1380, b4101	ACt2rpp, ARGDC, ARMEPNS, FADRx, FE3Ri, FLVRx, GLYALDtpp, GLYtpp, LDH_D, UREAtpp
1504	-58.8846	EX_succ_e	7.97599	-7.5	0.157559	7	34.9228	-10.6764	-2.79929	27.7291	9.99301	b3844, b4117, b0010, b3927, b1380, b2094, b1103	ACt2rpp, ARGDC, FADRx, FE3Ri, FLVRx, GALTptspp, GLYALDtpp, GLYtpp, LDH_D, PNSPA, UREAtpp
1505	-58.8846	EX_succ_e	7.97599	-7.5	0.157559	7	34.9228	-10.6764	-2.79929	27.7291	9.99301	b3844, b4117, b0010, b3664, b0047, b3927, b1380	ACt2rpp, ARGDC, FADRx, FE3Ri, FLVRx, GLYALDtpp, GLYtpp, LDH_D, UREAtpp
1506	-58.8846	EX_succ_e	7.97599	-7.5	0.157559	7	34.9228	-10.6764	-2.79929	27.7291	9.99301	b2716, b3844, b4117, b0010, b0860, b3927, b1380	ACt2rpp, ARGDC, FADRx, FE3Ri, FLVRx, GLYALDtpp, GLYtpp, LDH_D, UREAtpp
1507	-58.8846	EX_succ_e	7.97599	-7.5	0.157559	7	34.9228	-10.6764	-2.79929	27.7291	9.99301	b3844, b4117, b1873, b0010, b3927, b1380, b1022	ACt2rpp, ARGDC, DMSOR1pp, DMSOR2pp, FADRx, FE3Ri, FLVRx, GLYALDtpp, GLYtpp, LDH_D, PUACGAMS, PUACGAMtr, UREAtpp
1508	-58.8846	EX_succ_e	7.97599	-7.5	0.157559	7	34.9228	-10.6764	-2.79929	27.7291	9.99301	b3844, b4117, b0010, b1270, b2719, b3927, b1380	ACt2rpp, ARGDC, CBIAT, CBLAT, FADRx, FE3Ri, FLVRx, GLYALDtpp, GLYtpp, LDH_D, UREAtpp
1509	-58.8846	EX_succ_e	7.97599	-7.5	0.157559	7	34.9228	-10.6764	-2.79929	27.7291	9.99301	b3844, b4117, b2788, b0010, b3849, b3927, b1380	ACt2rpp, ARGDC, FADRx, FE3Ri, FLVRx, GLYALDtpp, GLYtpp, LDH_D, UREAtpp
1510	-58.8846	EX_succ_e	7.97599	-7.5	0.157559	7	34.9228	-10.6764	-2.79929	27.7291	9.99301	b3844, b3902, b0010, b4115, b0751, b3927, b1380	ACt2rpp, ARGAGMt7pp, FADRx, FE3Ri, FLVRx, GLYALDtpp, GLYtpp, LDH_D, NMNPtpp, RMPA, UREAtpp
1511	-58.8846	EX_succ_e	7.97599	-7.5	0.157559	7	34.9228	-10.6764	-2.79929	27.7291	9.99301	b3844, b1109, b0010, b4115, b2536, b3927, b1380	ACt2rpp, ARGAGMt7pp, FADRx, FE3Ri, FLVRx, GLYALDtpp, GLYtpp, LDH_D, PPPNt2rpp, UREAtpp
1512	-58.8846	EX_succ_e	7.97599	-7.5	0.157559	7	34.9228	-10.6764	-2.79929	27.7291	9.99301	b1587, b3844, b4117, b0010, b3927, b1380, b1661	ACt2rpp, ARGDC, CFAS160E, CFAS160G, CFAS180E, CFAS180G, FADRx, FE3Ri, FLVRx, GLYALDtpp, GLYtpp, LDH_D, SELR, UREAtpp
1513	-58.8846	EX_succ_e	7.97599	-7.5	0.157559	7	34.9228	-10.6764	-2.79929	27.7291	9.99301	b2290, b3844, b4117, b0010, b4115, b3927, b1380	ACt2rpp, ARGAGMt7pp, ARGDC, FADRx, FE3Ri, FLVRx, GLYALDtpp, GLYtpp, LDH_D, UREAtpp
1514	-58.8846	EX_succ_e	7.97599	-7.5	0.157559	7	34.9228	-10.6764	-2.79929	27.7291	9.99301	b3844, b4117, b0010, b3714, b3927, b1380, b1990	ACt2rpp, ARGDC, FADRx, FE3Ri, FLVRx, GLYALDtpp, GLYtpp, LDH_D, UREAtpp
1515	-58.8846	EX_succ_e	7.97599	-7.5	0.157559	7	34.9228	-10.6764	-2.79929	27.7291	9.99301	b3844, b4117, b0010, b2995, b3823, b3927, b1380	ACt2rpp, ARGDC, FADRx, FE3Ri, FLVRx, GLYALDtpp, GLYtpp, LDH_D, UREAtpp
1516	-58.8846	EX_succ_e	7.97599	-7.5	0.157559	7	34.9228	-10.6764	-2.79929	27.7291	9.99301	b3844, b0010, b4115, b1736, b3927, b1380, b3856	ACt2rpp, ARGAGMt7pp, CHTBSptspp, FADRx, FE3Ri, FLVRx, GLYALDtpp, GLYtpp, LDH_D, UREAtpp
1517	-58.8846	EX_succ_e	7.97599	-7.5	0.157559	7	34.9228	-10.6764	-2.79929	27.7291	9.99301	b3844, b4117, b4244, b0010, b2723, b3927, b1380	ACt2rpp, ARGDC, FADRx, FE3Ri, FLVRx, GLYALDtpp, GLYtpp, LDH_D, UREAtpp
1518	-58.8846	EX_succ_e	7.97599	-7.5	0.157559	7	34.9228	-10.6764	-2.79929	27.7291	9.99301	b3844, b4117, b0825, b0010, b4138, b3927, b1380	ACt2rpp, ARGDC, FADRx, FE3Ri, FLVRx, GLYALDtpp, GLYtpp, LDH_D, UREAtpp
1519	-58.8846	EX_succ_e	7.97599	-7.5	0.157559	7	34.9228	-10.6764	-2.79929	27.7291	9.99301	b3844, b0010, b0067, b4115, b3927, b1380, b2010	ACt2rpp, ARGAGMt7pp, FADRx, FE3Ri, FLVRx, GLYALDtpp, GLYtpp, LDH_D, THMabcpp, UREAtpp
1520	-58.8846	EX_succ_e	7.97599	-7.5	0.157559	7	34.9228	-10.6764	-2.79929	27.7291	9.99301	b3844, b4117, b0010, b2486, b3927, b1380, b2092	ACt2rpp, ARGDC, FADRx, FE3Ri, FLVRx, GALTptspp, GLYALDtpp, GLYtpp, LDH_D, UREAtpp
1521	-58.8846	EX_succ_e	7.97599	-7.5	0.157559	7	34.9228	-10.6764	-2.79929	27.7291	9.99301	b3844, b0010, b4115, b0341, b0854, b3927, b1380	ACt2rpp, ARGAGMt7pp, CYNTt2pp, FADRx, FE3Ri, FLVRx, GLYALDtpp, GLYtpp, LDH_D, UREAtpp
1522	-58.8846	EX_succ_e	7.97599	-7.5	0.157559	7	34.9228	-10.6764	-2.79929	27.7291	9.99301	b2465, b3844, b4117, b0010, b2723, b3927, b1380	ACt2rpp, ARGDC, FADRx, FE3Ri, FLVRx, GLYALDtpp, GLYtpp, LDH_D, UREAtpp
1523	-58.8846	EX_succ_e	7.97599	-7.5	0.157559	7	34.9228	-10.6764	-2.79929	27.7291	9.99301	b3844, b4117, b0010, b0765, b3927, b1380, b1485	ACt2rpp, ARGDC, FADRx, FE3Ri, FLVRx, GLYALDtpp, GLYtpp, LDH_D, TUNGSabcpp, UREAtpp
1524	-58.8846	EX_succ_e	7.97599	-7.5	0.157559	7	34.9228	-10.6764	-2.79929	27.7291	9.99301	b3693, b3844, b0010, b4115, b3927, b1380, b2711	ACt2rpp, ARGAGMt7pp, DDGALK, FADRx, FE3Ri, FLVRx, GLYALDtpp, GLYtpp, LDH_D, NHFRBO, UREAtpp
1525	-58.8846	EX_succ_e	7.97599	-7.5	0.157559	7	34.9228	-10.6764	-2.79929	27.7291	9.99301	b3844, b4117, b0010, b0650, b3927, b1380, b4136	ACt2rpp, ARGDC, DSBDR, FADRx, FE3Ri, FLVRx, GLYALDtpp, GLYtpp, LDH_D, TDSR1, TDSR2, UREAtpp
1526	-58.8846	EX_succ_e	7.97599	-7.5	0.157559	7	34.9228	-10.6764	-2.79929	27.7291	9.99301	b1478, b3844, b4117, b0010, b3927, b0622, b1380	ACt2rpp, ARGDC, FADRx, FE3Ri, FLVRx, GLYALDtpp, GLYtpp, LDH_D, LIPAHT2ex, LIPAHTex, UREAtpp
1527	-58.8846	EX_succ_e	7.97599	-7.5	0.157559	7	34.9228	-10.6764	-2.79929	27.7291	9.99301	b3844, b0010, b0860, b4115, b0092, b3927, b1380	ACt2rpp, ARGAGMt7pp, FADRx, FE3Ri, FLVRx, GLYALDtpp, GLYtpp, LDH_D, UREAtpp
1528	-58.8846	EX_succ_e	7.97599	-7.5	0.157559	7	34.9228	-10.6764	-2.79929	27.7291	9.99301	b2518, b3844, b4117, b0010, b2702, b3927, b1380	ACt2rpp, ARGDC, FADRx, FE3Ri, FLVRx, GLYALDtpp, GLYtpp, LDH_D, SBTptspp, UREAtpp
1529	-58.8846	EX_succ_e	7.97599	-7.5	0.157559	7	34.9228	-10.6764	-2.79929	27.7291	9.99301	b3844, b4117, b0010, b3571, b3390, b3927, b1380	AAMYLpp, ACt2rpp, ARGDC, FADRx, FE3Ri, FLVRx, GLYALDtpp, GLYtpp, LDH_D, UREAtpp
1530	-58.8846	EX_succ_e	7.97599	-7.5	0.157559	7	34.9228	-10.6764	-2.79929	27.7291	9.99301	b3844, b3137, b0010, b1818, b4115, b3927, b1380	2DGLCptspp, ACMANAptspp, ACt2rpp, ARGAGMt7pp, FADRx, FE3Ri, FLVRx, FRUpts2pp, GAMptspp, GLYALDtpp, GLYtpp, LDH_D, MANptspp, UREAtpp
1531	-58.8846	EX_succ_e	7.97599	-7.5	0.157559	7	34.9228	-10.6764	-2.79929	27.7291	9.99301	b3844, b2918, b0010, b4115, b3927, b1380, b3182	ACt2rpp, ARGAGMt7pp, FADRx, FE3Ri, FLVRx, GLYALDtpp, GLYtpp, LDH_D, UREAtpp
1532	-58.8846	EX_succ_e	7.97599	-7.5	0.157559	7	34.9228	-10.6764	-2.79929	27.7291	9.99301	b3844, b3428, b2096, b0010, b4115, b3927, b1380	ACt2rpp, ARGAGMt7pp, FADRx, FE3Ri, FLVRx, GLYALDtpp, GLYtpp, LDH_D, UREAtpp
1533	-58.8846	EX_succ_e	7.97599	-7.5	0.157559	7	34.9228	-10.6764	-2.79929	27.7291	9.99301	b2458, b3844, b4117, b0010, b3927, b1380, b1484	ACt2rpp, ARGDC, FADRx, FE3Ri, FLVRx, GLYALDtpp, GLYtpp, LDH_D, UREAtpp
1534	-58.8846	EX_succ_e	7.97599	-7.5	0.157559	7	34.9228	-10.6764	-2.79929	27.7291	9.99301	b3844, b0010, b4115, b3907, b3927, b1380, b2093	ACt2rpp, ARGAGMt7pp, FADRx, FE3Ri, FLVRx, GALTptspp, GLYALDtpp, GLYtpp, LDH_D, LYXt2pp, RMNtpp, UREAtpp
1535	-58.8846	EX_succ_e	7.97599	-7.5	0.157559	7	34.9228	-10.6764	-2.79929	27.7291	9.99301	b0078, b3844, b4117, b0010, b2720, b3927, b1380	ACt2rpp, ARGDC, FADRx, FE3Ri, FLVRx, GLYALDtpp, GLYtpp, LDH_D, UREAtpp
1536	-58.8846	EX_succ_e	7.97599	-7.5	0.157559	7	34.9228	-10.6764	-2.79929	27.7291	9.99301	b3844, b4117, b1524, b0010, b0863, b3927, b1380	ACt2rpp, ARGDC, FADRx, FE3Ri, FLVRx, GLYALDtpp, GLYtpp, LDH_D, UREAtpp
1537	-58.8846	EX_succ_e	7.97599	-7.5	0.157559	7	34.9228	-10.6764	-2.79929	27.7291	9.99301	b3844, b4117, b1466, b0010, b3567, b3927, b1380	ACt2rpp, ARGDC, FADRx, FE3Ri, FLVRx, GLYALDtpp, GLYtpp, LDH_D, UREAtpp, XYLabcpp
1538	-58.8846	EX_succ_e	7.97599	-7.5	0.157559	7	34.9228	-10.6764	-2.79929	27.7291	9.99301	b3844, b4117, b4196, b0010, b3927, b1380, b0376	ACt2rpp, ARGDC, FADRx, FE3Ri, FLVRx, GLYALDtpp, GLYtpp, LDH_D, UREAtpp
1539	-58.8846	EX_succ_e	7.97599	-7.5	0.157559	7	34.9228	-10.6764	-2.79929	27.7291	9.99301	b3844, b4117, b0010, b0864, b3927, b2303, b1380	ACt2rpp, ARGDC, DHPTPE, FADRx, FE3Ri, FLVRx, GLYALDtpp, GLYtpp, LDH_D, UREAtpp
1540	-58.8846	EX_succ_e	7.97599	-7.5	0.157559	7	34.9228	-10.6764	-2.79929	27.7291	9.99301	b3844, b4117, b0010, b3714, b3927, b1380, b4392	ACt2rpp, ARGDC, FADRx, FE3Ri, FLVRx, GLYALDtpp, GLYtpp, LDH_D, UREAtpp
1541	-58.8846	EX_succ_e	7.97599	-7.5	0.157559	7	34.9228	-10.6764	-2.79929	27.7291	9.99301	b3844, b4117, b0010, b3374, b3927, b1380, b3291	ACt2rpp, ARGDC, FADRx, FE3Ri, FLVRx, FRULYSK, GLYALDtpp, GLYtpp, LDH_D, UREAtpp
1542	-58.8846	EX_succ_e	7.97599	-7.5	0.157559	7	34.9228	-10.6764	-2.79929	27.7291	9.99301	b3844, b4117, b0010, b4055, b3749, b3927, b1380	ACt2rpp, ARGDC, FADRx, FE3Ri, FLVRx, GLYALDtpp, GLYtpp, LDH_D, TYRPpp, UREAtpp
1543	-58.8846	EX_succ_e	7.97599	-7.5	0.157559	7	34.9228	-10.6764	-2.79929	27.7291	9.99301	b3844, b4117, b3397, b0010, b2256, b3927, b1380	ACt2rpp, ARGDC, FADRx, FE3Ri, FLVRx, GLYALDtpp, GLYtpp, LDH_D, UPLA4FNF, UREAtpp
1544	-58.8846	EX_succ_e	7.97599	-7.5	0.157559	7	34.9228	-10.6764	-2.79929	27.7291	9.99301	b3844, b4117, b0010, b3290, b0867, b3927, b1380	ACt2rpp, ARGDC, FADRx, FE3Ri, FLVRx, GLYALDtpp, GLYtpp, LDH_D, UREAtpp
1545	-58.8846	EX_succ_e	7.97599	-7.5	0.157559	7	34.9228	-10.6764	-2.79929	27.7291	9.99301	b3844, b4117, b0010, b2482, b2995, b3927, b1380	ACt2rpp, ARGDC, FADRx, FE3Ri, FLVRx, GLYALDtpp, GLYtpp, LDH_D, UREAtpp
1546	-58.8846	EX_succ_e	7.97599	-7.5	0.157559	7	34.9228	-10.6764	-2.79929	27.7291	9.99301	b3844, b4117, b2095, b0010, b3927, b1380, b1484	ACt2rpp, ARGDC, FADRx, FE3Ri, FLVRx, GLYALDtpp, GLYtpp, LDH_D, UREAtpp
1547	-58.8846	EX_succ_e	7.97599	-7.5	0.157559	7	34.9228	-10.6764	-2.79929	27.7291	9.99301	b3844, b4117, b1907, b0010, b3927, b1380, b1484	ACt2rpp, ARGDC, FADRx, FE3Ri, FLVRx, GLYALDtpp, GLYtpp, LDH_D, UREAtpp
1548	-58.8846	EX_succ_e	7.97599	-7.5	0.157559	7	34.9228	-10.6764	-2.79929	27.7291	9.99301	b3844, b0010, b4115, b3927, b1380, b0681, b3241	4HBZt3pp, ACt2rpp, ARGAGMt7pp, FADRx, FE3Ri, FLVRx, GLYALDtpp, GLYtpp, LDH_D, UREAtpp
1549	-58.8846	EX_succ_e	7.97599	-7.5	0.157559	7	34.9228	-10.6764	-2.79929	27.7291	9.99301	b3844, b0688, b0010, b4115, b1723, b3927, b1380	ACt2rpp, ARGAGMt7pp, FADRx, FE3Ri, FLVRx, GLYALDtpp, GLYtpp, LDH_D, UREAtpp
1550	-58.8846	EX_succ_e	7.97599	-7.5	0.157559	7	34.9228	-10.6764	-2.79929	27.7291	9.99301	b3844, b4117, b2668, b4471, b0010, b3927, b1380	ACt2rpp, ARGDC, FADRx, FE3Ri, FLVRx, GLYALDtpp, GLYtpp, LDH_D, UREAtpp
1551	-58.8846	EX_succ_e	7.97599	-7.5	0.157559	7	34.9228	-10.6764	-2.79929	27.7291	9.99301	b0896, b3844, b0010, b4115, b4035, b3927, b1380	14GLUCANabcpp, ACt2rpp, ARGAGMt7pp, DMSOR2, FADRx, FE3Ri, FLVRx, GLYALDtpp, GLYtpp, LDH_D, MALTHXabcpp, MALTPTabcpp, MALTTRabcpp, MALTTTRabcpp, MALTabcpp, TMAOR2, UREAtpp
1552	-58.8846	EX_succ_e	7.97599	-7.5	0.157559	7	34.9228	-10.6764	-2.79929	27.7291	9.99301	b3844, b4117, b2788, b0010, b3571, b3927, b1380	AAMYLpp, ACt2rpp, ARGDC, FADRx, FE3Ri, FLVRx, GLYALDtpp, GLYtpp, LDH_D, UREAtpp
1553	-58.8846	EX_succ_e	7.97599	-7.5	0.157559	7	34.9228	-10.6764	-2.79929	27.7291	9.99301	b3126, b4232, b3844, b4117, b0010, b3927, b1380	ACt2rpp, ARGDC, FADRx, FE3Ri, FLVRx, GLCRAL, GLYALDtpp, GLYtpp, LDH_D, UREAtpp
1554	-58.8846	EX_succ_e	7.97599	-7.5	0.157559	7	34.9228	-10.6764	-2.79929	27.7291	9.99301	b3844, b4117, b0010, b4034, b3927, b4394, b1380	14GLUCANabcpp, ACt2rpp, ARGDC, FADRx, FE3Ri, FLVRx, GLYALDtpp, GLYtpp, LDH_D, MALTHXabcpp, MALTPTabcpp, MALTTRabcpp, MALTTTRabcpp, MALTabcpp, NTP11, NTP12, UREAtpp
1555	-58.8846	EX_succ_e	7.97599	-7.5	0.157559	7	34.9228	-10.6764	-2.79929	27.7291	9.99301	b3844, b0010, b0066, b4115, b3927, b1380, b1276	ACt2rpp, ARGAGMt7pp, FADRx, FE3Ri, FLVRx, GLYALDtpp, GLYtpp, LDH_D, THMabcpp, UREAtpp
1556	-58.8846	EX_succ_e	7.97599	-7.5	0.157559	7	34.9228	-10.6764	-2.79929	27.7291	9.99301	b3844, b4117, b0010, b1817, b2789, b3927, b1380	2DGLCptspp, ACMANAptspp, ACt2rpp, ARGDC, FADRx, FE3Ri, FLVRx, FRUpts2pp, GAMptspp, GLYALDtpp, GLYtpp, LDH_D, MANptspp, UREAtpp
1557	-58.8846	EX_succ_e	7.97599	-7.5	0.157559	7	34.9228	-10.6764	-2.79929	27.7291	9.99301	b3844, b4117, b0010, b3927, b2303, b1380, b3857	ACt2rpp, ARGDC, BMOGDS1, BMOGDS2, BWCOGDS1, BWCOGDS2, DHPTPE, FADRx, FE3Ri, FLVRx, GLYALDtpp, GLYtpp, LDH_D, MOGDS, UREAtpp
1558	-58.8846	EX_succ_e	7.97599	-7.5	0.157559	7	34.9228	-10.6764	-2.79929	27.7291	9.99301	b2502, b3844, b4117, b0010, b1441, b3927, b1380	ACt2rpp, ARGDC, FADRx, FE3Ri, FLVRx, GLYALDtpp, GLYtpp, LDH_D, UREAtpp
1559	-58.8846	EX_succ_e	7.97599	-7.5	0.157559	7	34.9228	-10.6764	-2.79929	27.7291	9.99301	b3844, b4117, b3583, b0010, b0621, b3927, b1380	ACt2rpp, ARGDC, FADRx, FE3Ri, FLVRx, GLYALDtpp, GLYtpp, LDH_D, UREAtpp
1560	-58.8846	EX_succ_e	7.97599	-7.5	0.157559	7	34.9228	-10.6764	-2.79929	27.7291	9.99301	b3222, b3844, b0010, b4115, b2032, b3927, b1380	ACt2rpp, AMANK, ARGAGMt7pp, FADRx, FE3Ri, FLVRx, GLYALDtpp, GLYtpp, LDH_D, O16GLCT1, UREAtpp
1561	-58.8846	EX_succ_e	7.97599	-7.5	0.157559	7	34.9228	-10.6764	-2.79929	27.7291	9.99301	b3844, b4117, b0010, b2027, b3927, b1380, b2813	ACt2rpp, ARGDC, FADRx, FE3Ri, FLVRx, GLYALDtpp, GLYtpp, LDH_D, O16AP1pp, O16AP2pp, O16AP3pp, UREAtpp
1562	-58.8846	EX_succ_e	7.97599	-7.5	0.157559	7	34.9228	-10.6764	-2.79929	27.7291	9.99301	b3844, b1004, b4117, b2538, b0010, b3927, b1380	ACt2rpp, ARGDC, CINNDO, FADRx, FE3Ri, FLVRx, GLYALDtpp, GLYtpp, LDH_D, PPPNDO, UREAtpp
1563	-58.8846	EX_succ_e	7.97599	-7.5	0.157559	7	34.9228	-10.6764	-2.79929	27.7291	9.99301	b1676, b3844, b4117, b0010, b3927, b1380, b3892	ACt2rpp, ARGDC, FADRx, FE3Ri, FLVRx, GLYALDtpp, GLYtpp, LDH_D, UREAtpp
1564	-58.8846	EX_succ_e	7.97599	-7.5	0.157559	7	34.9228	-10.6764	-2.79929	27.7291	9.99301	b3588, b2930, b3844, b0010, b4115, b3927, b1380	ACt2rpp, ARGAGMt7pp, FADRx, FE3Ri, FLVRx, GLYALDtpp, GLYtpp, LDH_D, UREAtpp
1565	-58.8846	EX_succ_e	7.97599	-7.5	0.157559	7	34.9228	-10.6764	-2.79929	27.7291	9.99301	b3844, b4146, b4117, b0010, b3927, b1380, b0875	ACt2rpp, ARGDC, FADRx, FE3Ri, FLVRx, GLYALDtpp, GLYtpp, LDH_D, LYSAM, UREAtpp
1566	-58.8846	EX_succ_e	7.97599	-7.5	0.157559	7	34.9228	-10.6764	-2.79929	27.7291	9.99301	b3844, b4117, b0010, b3927, b0070, b1380, b3496	ACt2rpp, ARGDC, FADRx, FE3Ri, FLVRx, GLYALDtpp, GLYtpp, LDH_D, UREAtpp
1567	-58.8846	EX_succ_e	7.97599	-7.5	0.157559	7	34.9228	-10.6764	-2.79929	27.7291	9.99301	b3844, b4117, b0010, b0863, b3927, b1380, b1794	ACt2rpp, ARGDC, FADRx, FE3Ri, FLVRx, GLYALDtpp, GLYtpp, LDH_D, UREAtpp
1568	-58.8846	EX_succ_e	7.97599	-7.5	0.157559	7	34.9228	-10.6764	-2.79929	27.7291	9.99301	b3844, b2104, b4117, b0010, b3567, b3927, b1380	ACt2rpp, ARGDC, FADRx, FE3Ri, FLVRx, GLYALDtpp, GLYtpp, HETZK, LDH_D, UREAtpp, XYLabcpp
1569	-58.8846	EX_succ_e	7.97599	-7.5	0.157559	7	34.9228	-10.6764	-2.79929	27.7291	9.99301	b3844, b4117, b0010, b2723, b3927, b0484, b1380	ACt2rpp, ARGDC, CU1abcpp, FADRx, FE3Ri, FLVRx, GLYALDtpp, GLYtpp, LDH_D, UREAtpp
1570	-58.8846	EX_succ_e	7.97599	-7.5	0.157559	7	34.9228	-10.6764	-2.79929	27.7291	9.99301	b3844, b4117, b1468, b0010, b3567, b3927, b1380	ACt2rpp, ARGDC, FADRx, FE3Ri, FLVRx, GLYALDtpp, GLYtpp, LDH_D, UREAtpp, XYLabcpp
1571	-58.8846	EX_succ_e	7.97599	-7.5	0.157559	7	34.9228	-10.6764	-2.79929	27.7291	9.99301	b3844, b1004, b0010, b2523, b4115, b3927, b1380	ACt2rpp, ARGAGMt7pp, FADRx, FE3Ri, FLVRx, GLYALDtpp, GLYtpp, LDH_D, UREAtpp
1572	-58.8846	EX_succ_e	7.97599	-7.5	0.157559	7	34.9228	-10.6764	-2.79929	27.7291	9.99301	b3844, b4117, b3397, b0010, b3749, b3927, b1380	ACt2rpp, ARGDC, FADRx, FE3Ri, FLVRx, GLYALDtpp, GLYtpp, LDH_D, UREAtpp
1573	-58.8846	EX_succ_e	7.97599	-7.5	0.157559	7	34.9228	-10.6764	-2.79929	27.7291	9.99301	b3844, b4117, b1466, b0010, b0849, b3927, b1380	ACt2rpp, ARGDC, FADRx, FE3Ri, FLVRx, GLYALDtpp, GLYtpp, LDH_D, UREAtpp
1574	-58.8846	EX_succ_e	7.97599	-7.5	0.157559	7	34.9228	-10.6764	-2.79929	27.7291	9.99301	b3011, b3844, b1873, b0010, b4115, b3927, b1380	13PPDH2, ACt2rpp, ARGAGMt7pp, DMSOR1pp, DMSOR2pp, FADRx, FE3Ri, FLVRx, GLYALDtpp, GLYtpp, LDH_D, UREAtpp
1575	-58.8846	EX_succ_e	7.97599	-7.5	0.157559	7	34.9228	-10.6764	-2.79929	27.7291	9.99301	b2781, b3844, b0010, b4115, b3927, b1380, b0827	ACt2rpp, ARGAGMt7pp, BMOCOS, BWCOS, FADRx, FE3Ri, FLVRx, GLYALDtpp, GLYtpp, LDH_D, MOCOS, UREAtpp, WCOS
1576	-58.8846	EX_succ_e	7.97599	-7.5	0.157559	7	34.9228	-10.6764	-2.79929	27.7291	9.99301	b3844, b4117, b0010, b1386, b2933, b3927, b1380	42A12BOOXpp, ACt2rpp, ARGDC, FADRx, FE3Ri, FLVRx, GLYALDtpp, GLYtpp, LDH_D, PEAMNOpp, TYROXDApp, UREAtpp
1577	-58.8846	EX_succ_e	7.97599	-7.5	0.157559	7	34.9228	-10.6764	-2.79929	27.7291	9.99301	b3844, b0675, b2204, b0010, b4115, b3927, b1380	ACt2rpp, ARGAGMt7pp, FADRx, FE3Ri, FLVRx, GLYALDtpp, GLYtpp, LDH_D, NO3R1bpp, UREAtpp
1578	-58.8846	EX_succ_e	7.97599	-7.5	0.157559	7	34.9228	-10.6764	-2.79929	27.7291	9.99301	b3844, b0010, b0867, b4115, b3927, b1380, b1006	ACt2rpp, ARGAGMt7pp, FADRx, FE3Ri, FLVRx, GLYALDtpp, GLYtpp, LDH_D, UREAtpp
1579	-58.8846	EX_succ_e	7.97599	-7.5	0.157559	7	34.9228	-10.6764	-2.79929	27.7291	9.99301	b4269, b3844, b4117, b0828, b0010, b3927, b1380	ACt2rpp, ARGDC, FADRx, FE3Ri, FLVRx, GLYALDtpp, GLYtpp, LDH_D, UREAtpp
1580	-58.8846	EX_succ_e	7.97599	-7.5	0.157559	7	34.9228	-10.6764	-2.79929	27.7291	9.99301	b3844, b4117, b3583, b0010, b3927, b1380, b0009	ACt2rpp, ARGDC, FADRx, FE3Ri, FLVRx, GLYALDtpp, GLYtpp, LDH_D, MPTAT, UREAtpp
1581	-58.8846	EX_succ_e	7.97599	-7.5	0.157559	7	34.9228	-10.6764	-2.79929	27.7291	9.99301	b1694, b3844, b2215, b0010, b4115, b3927, b1380	ACt2rpp, ARGAGMt7pp, FADRx, FE3Ri, FLVRx, GLYALDtpp, GLYtpp, LDH_D, UREAtpp
1582	-58.8846	EX_succ_e	7.97599	-7.5	0.157559	7	34.9228	-10.6764	-2.79929	27.7291	9.99301	b3844, b4117, b0010, b0972, b3927, b1380, b0577	ACt2rpp, ARGDC, FADRx, FE3Ri, FLVRx, GLYALDtpp, GLYtpp, LDH_D, UREAtpp
1583	-58.8846	EX_succ_e	7.97599	-7.5	0.157559	7	34.9228	-10.6764	-2.79929	27.7291	9.99301	b3564, b2708, b3844, b4117, b0010, b3927, b1380	ACt2rpp, ARGDC, DXYLK, FADRx, FE3Ri, FLVRx, GLYALDtpp, GLYtpp, LDH_D, UREAtpp
1584	-58.8846	EX_succ_e	7.97599	-7.5	0.157559	7	34.9228	-10.6764	-2.79929	27.7291	9.99301	b2041, b3844, b4014, b0010, b4115, b3927, b1380	ACt2rpp, ARGAGMt7pp, FADRx, FE3Ri, FLVRx, GLYALDtpp, GLYtpp, LDH_D, UREAtpp
1585	-58.8846	EX_succ_e	7.97599	-7.5	0.157559	7	34.9228	-10.6764	-2.79929	27.7291	9.99301	b3844, b4117, b0010, b0864, b3927, b1380, b3943	ACt2rpp, ARGDC, CYSItpp, FADRx, FE3Ri, FLVRx, GLYALDtpp, GLYtpp, LDH_D, UREAtpp
1586	-58.8846	EX_succ_e	7.97599	-7.5	0.157559	7	34.9228	-10.6764	-2.79929	27.7291	9.99301	b3844, b4117, b3551, b0010, b0341, b3927, b1380	ACt2rpp, ARGDC, BSORx, BSORy, CYNTt2pp, FADRx, FE3Ri, FLVRx, GLYALDtpp, GLYtpp, LDH_D, UREAtpp
1587	-58.8846	EX_succ_e	7.97599	-7.5	0.157559	7	34.9228	-10.6764	-2.79929	27.7291	9.99301	b3844, b4117, b0010, b3927, b1380, b4136, b2503	ACt2rpp, ARGDC, DSBDR, FADRx, FE3Ri, FLVRx, GLYALDtpp, GLYtpp, LDH_D, TDSR1, TDSR2, UREAtpp
1588	-58.8846	EX_succ_e	7.97599	-7.5	0.157559	7	34.9228	-10.6764	-2.79929	27.7291	9.99301	b3844, b4117, b0010, b3290, b3927, b0756, b1380	ACt2rpp, ARGDC, FADRx, FE3Ri, FLVRx, GALM2pp, GLYALDtpp, GLYtpp, LDH_D, UREAtpp
1589	-58.8846	EX_succ_e	7.97599	-7.5	0.157559	7	34.9228	-10.6764	-2.79929	27.7291	9.99301	b3844, b4117, b0010, b0855, b3927, b1380, b3493	ACt2rpp, ARGDC, FADRx, FE3Ri, FLVRx, GLYALDtpp, GLYtpp, LDH_D, UREAtpp
1590	-58.8846	EX_succ_e	7.97599	-7.5	0.157559	7	34.9228	-10.6764	-2.79929	27.7291	9.99301	b1590, b3844, b0010, b4115, b3927, b1380, b0783	ACt2rpp, ARGAGMt7pp, CPMPS, FADRx, FE3Ri, FLVRx, GLYALDtpp, GLYtpp, LDH_D, SELR, UREAtpp
1591	-58.8846	EX_succ_e	7.97599	-7.5	0.157559	7	34.9228	-10.6764	-2.79929	27.7291	9.99301	b3844, b0010, b1250, b4115, b3927, b1380, b3496	ACt2rpp, ARGAGMt7pp, FADRx, FE3Ri, FLVRx, GLYALDtpp, GLYtpp, LDH_D, UREAtpp
1592	-58.8846	EX_succ_e	7.97599	-7.5	0.157559	7	34.9228	-10.6764	-2.79929	27.7291	9.99301	b3844, b0010, b3917, b4115, b3666, b3927, b1380	ACt2rpp, ARGAGMt7pp, F6Pt6_2pp, FADRx, FE3Ri, FLVRx, G6Pt6_2pp, GAM6Pt6_2pp, GLYALDtpp, GLYtpp, LDH_D, MAN6Pt6_2pp, UREAtpp
1593	-58.8846	EX_succ_e	7.97599	-7.5	0.157559	7	34.9228	-10.6764	-2.79929	27.7291	9.99301	b3844, b4117, b0010, b3927, b1380, b1519, b0783	ACONMT, ACt2rpp, ARGDC, CPMPS, FADRx, FE3Ri, FLVRx, GLYALDtpp, GLYtpp, LDH_D, UREAtpp
1594	-58.8846	EX_succ_e	7.97599	-7.5	0.157559	7	34.9228	-10.6764	-2.79929	27.7291	9.99301	b2465, b3844, b4117, b0010, b1781, b3927, b1380	ACt2rpp, ARGDC, FADRx, FE3Ri, FLVRx, GLYALDtpp, GLYtpp, LDH_D, UREAtpp
1595	-58.8846	EX_succ_e	7.97599	-7.5	0.157559	7	34.9228	-10.6764	-2.79929	27.7291	9.99301	b3844, b1701, b0010, b4115, b2483, b3927, b1380	ACt2rpp, ARGAGMt7pp, FADRx, FE3Ri, FLVRx, GLYALDtpp, GLYtpp, LDH_D, UREAtpp
1596	-58.8846	EX_succ_e	7.97599	-7.5	0.157559	7	34.9228	-10.6764	-2.79929	27.7291	9.99301	b3844, b4117, b4352, b0010, b1197, b3927, b1380	ACt2rpp, ARGDC, FADRx, FE3Ri, FLVRx, GLYALDtpp, GLYtpp, LDH_D, TREHpp, UREAtpp
1597	-58.8846	EX_succ_e	7.97599	-7.5	0.157559	7	34.9228	-10.6764	-2.79929	27.7291	9.99301	b3844, b1656, b0010, b4115, b3927, b1380, b2164	ACt2rpp, ARGAGMt7pp, FADRx, FE3Ri, FLVRx, GLYALDtpp, GLYtpp, LDH_D, PSURItpp, UREAtpp
1598	-58.8846	EX_succ_e	7.97599	-7.5	0.157559	7	34.9228	-10.6764	-2.79929	27.7291	9.99301	b3844, b4117, b3600, b2538, b0010, b3927, b1380	ACt2rpp, ARGDC, CINNDO, FADRx, FE3Ri, FLVRx, GLYALDtpp, GLYtpp, LDH_D, M1PD, PPPNDO, UREAtpp
1599	-58.8846	EX_succ_e	7.97599	-7.5	0.157559	7	34.9228	-10.6764	-2.79929	27.7291	9.99301	b3844, b0010, b4115, b1737, b3927, b1380, b3966	ACt2rpp, ADOCBLtonex, ARGAGMt7pp, CBItonex, CBL1tonex, CHTBSptspp, FADRx, FE3Ri, FLVRx, GLYALDtpp, GLYtpp, LDH_D, UREAtpp
1600	-58.8846	EX_succ_e	7.97599	-7.5	0.157559	7	34.9228	-10.6764	-2.79929	27.7291	9.99301	b3844, b1224, b0010, b4115, b3927, b1380, b2843	ACt2rpp, ARGAGMt7pp, FADRx, FE3Ri, FLVRx, GLYALDtpp, GLYtpp, KDUI, LDH_D, UREAtpp
1601	-58.8846	EX_succ_e	7.97599	-7.5	0.157559	7	34.9228	-10.6764	-2.79929	27.7291	9.99301	b3844, b4117, b0010, b3390, b3927, b1380, b2430	ACt2rpp, ARGDC, FADRx, FE3Ri, FLVRx, GLYALDtpp, GLYtpp, LDH_D, UREAtpp
1602	-58.8846	EX_succ_e	7.97599	-7.5	0.157559	7	34.9228	-10.6764	-2.79929	27.7291	9.99301	b1478, b3844, b4117, b0010, b0341, b3927, b1380	ACt2rpp, ARGDC, CYNTt2pp, FADRx, FE3Ri, FLVRx, GLYALDtpp, GLYtpp, LDH_D, UREAtpp
1603	-58.8846	EX_succ_e	7.97599	-7.5	0.157559	7	34.9228	-10.6764	-2.79929	27.7291	9.99301	b3844, b0010, b4115, b2483, b3927, b1380, b0604	ACt2rpp, ARGAGMt7pp, DSBGGT, FADRx, FE3Ri, FLVRx, GLYALDtpp, GLYtpp, LDH_D, TDSR2, UREAtpp
1604	-58.8846	EX_succ_e	7.97599	-7.5	0.157559	7	34.9228	-10.6764	-2.79929	27.7291	9.99301	b3844, b4117, b0010, b0047, b3927, b1380, b1008	ACt2rpp, ARGDC, FADRx, FE3Ri, FLVRx, GLYALDtpp, GLYtpp, LDH_D, UREAtpp
1605	-58.8846	EX_succ_e	7.97599	-7.5	0.157559	7	34.9228	-10.6764	-2.79929	27.7291	9.99301	b3844, b4117, b1584, b0010, b3739, b3927, b1380	ACt2rpp, ARGDC, FADRx, FE3Ri, FLVRx, GLYALDtpp, GLYtpp, LDH_D, SPMDAT1, SPMDAT2, UREAtpp
1606	-58.8846	EX_succ_e	7.97599	-7.5	0.157559	7	34.9228	-10.6764	-2.79929	27.7291	9.99301	b1589, b3844, b4117, b0010, b0842, b3927, b1380	ACt2rpp, ARGDC, FADRx, FE3Ri, FLVRx, GLYALDtpp, GLYtpp, LDH_D, SELR, UREAtpp
1607	-58.8846	EX_succ_e	7.97599	-7.5	0.157559	7	34.9228	-10.6764	-2.79929	27.7291	9.99301	b3844, b4117, b0010, b3567, b1991, b3927, b1380	ACt2rpp, ARGDC, FADRx, FE3Ri, FLVRx, GLYALDtpp, GLYtpp, LDH_D, NNDMBRT, UREAtpp, XYLabcpp
1608	-58.8846	EX_succ_e	7.97599	-7.5	0.157559	7	34.9228	-10.6764	-2.79929	27.7291	9.99301	b3844, b4117, b0010, b2169, b3927, b1380, b1519	ACONMT, ACt2rpp, ARGDC, FADRx, FE3Ri, FLVRx, FRUptspp, GLYALDtpp, GLYtpp, LDH_D, UREAtpp
1609	-58.8846	EX_succ_e	7.97599	-7.5	0.157559	7	34.9228	-10.6764	-2.79929	27.7291	9.99301	b3844, b0010, b4115, b3927, b1380, b1617, b1798	ACt2rpp, ARGAGMt7pp, FADRx, FE3Ri, FLVRx, GLYALDtpp, GLYtpp, LDH_D, METGLCUR, UREAtpp
1610	-58.8846	EX_succ_e	7.97599	-7.5	0.157559	7	34.9228	-10.6764	-2.79929	27.7291	9.99301	b2464, b3844, b4117, b0010, b3927, b1380, b0604	ACt2rpp, ARGDC, DSBGGT, FADRx, FE3Ri, FLVRx, GLYALDtpp, GLYtpp, LDH_D, TDSR2, UREAtpp
1611	-58.8846	EX_succ_e	7.97599	-7.5	0.157559	7	34.9228	-10.6764	-2.79929	27.7291	9.99301	b3844, b3581, b0010, b4115, b3927, b1380, b4386	ACt2rpp, ARGAGMt7pp, FADRx, FE3Ri, FLVRx, GLYALDtpp, GLYtpp, LDH_D, LIPAMPL, LIPATPT, OCTNLL, UREAtpp
1612	-58.8846	EX_succ_e	7.97599	-7.5	0.157559	7	34.9228	-10.6764	-2.79929	27.7291	9.99301	b3789, b3844, b0010, b4115, b2254, b3927, b1380	ACt2rpp, ARGAGMt7pp, FADRx, FE3Ri, FLVRx, GLYALDtpp, GLYtpp, LDH_D, UPLA4FNT, UREAtpp
1613	-58.8846	EX_succ_e	7.97599	-7.5	0.157559	7	34.9228	-10.6764	-2.79929	27.7291	9.99301	b3225, b3844, b4117, b1468, b0010, b3927, b1380	ACNML, ACt2rpp, ARGDC, FADRx, FE3Ri, FLVRx, GLYALDtpp, GLYtpp, LDH_D, UREAtpp
1614	-58.8846	EX_succ_e	7.97599	-7.5	0.157559	7	34.9228	-10.6764	-2.79929	27.7291	9.99301	b2716, b3844, b4117, b1584, b0010, b3927, b1380	ACt2rpp, ARGDC, FADRx, FE3Ri, FLVRx, GLYALDtpp, GLYtpp, LDH_D, SPMDAT1, SPMDAT2, UREAtpp
1615	-58.8846	EX_succ_e	7.97599	-7.5	0.157559	7	34.9228	-10.6764	-2.79929	27.7291	9.99301	b3844, b0010, b4115, b4131, b3927, b1380, b4098	ACt2rpp, ARGAGMt7pp, CPL, FADRx, FE3Ri, FLVRx, GLYALDtpp, GLYtpp, LDH_D, UREAtpp
1616	-58.8846	EX_succ_e	7.97599	-7.5	0.157559	7	34.9228	-10.6764	-2.79929	27.7291	9.99301	b3844, b2937, b2202, b0010, b4115, b3927, b1380	ACt2rpp, AGMT, ARGAGMt7pp, FADRx, FE3Ri, FLVRx, GLYALDtpp, GLYtpp, LDH_D, NO3R1bpp, NO3R2bpp, UREAtpp
1617	-58.8846	EX_succ_e	7.97599	-7.5	0.157559	7	34.9228	-10.6764	-2.79929	27.7291	9.99301	b3844, b0010, b4115, b1059, b0854, b3927, b1380	ACt2rpp, ARGAGMt7pp, FADRx, FE3Ri, FLVRx, GLYALDtpp, GLYtpp, LDH_D, MTRPOX, SARCOX, UREAtpp
1618	-58.8846	EX_succ_e	7.97599	-7.5	0.157559	7	34.9228	-10.6764	-2.79929	27.7291	9.99301	b0125, b3844, b4117, b0010, b0932, b3927, b1380	ACt2rpp, ARGDC, FADRx, FE3Ri, FLVRx, GLYALDtpp, GLYtpp, LDH_D, UREAtpp
1619	-58.8846	EX_succ_e	7.97599	-7.5	0.157559	7	34.9228	-10.6764	-2.79929	27.7291	9.99301	b3844, b4117, b0010, b4079, b3927, b1380, b0839	ACt2rpp, ARGDC, FADRx, FE3Ri, FHL, FLVRx, GLYALDtpp, GLYtpp, LDH_D, UREAtpp
1620	-58.8846	EX_succ_e	7.97599	-7.5	0.157559	7	34.9228	-10.6764	-2.79929	27.7291	9.99301	b3844, b0010, b4115, b3502, b1002, b3927, b1380	ACt2rpp, ARGAGMt7pp, ASO3t8pp, FADRx, FE3Ri, FLVRx, GAL1PPpp, GLYALDtpp, GLYtpp, LDH_D, UREAtpp
1621	-58.8846	EX_succ_e	7.97599	-7.5	0.157559	7	34.9228	-10.6764	-2.79929	27.7291	9.99301	b1095, b3844, b4117, b0010, b4115, b3927, b1380	3OAS181, ACt2rpp, ARGAGMt7pp, ARGDC, FADRx, FE3Ri, FLVRx, GLYALDtpp, GLYtpp, LDH_D, UREAtpp
1622	-58.8846	EX_succ_e	7.97599	-7.5	0.157559	7	34.9228	-10.6764	-2.79929	27.7291	9.99301	b1095, b3844, b4117, b0010, b3927, b1380, b3241	3OAS181, 4HBZt3pp, ACt2rpp, ARGDC, FADRx, FE3Ri, FLVRx, GLYALDtpp, GLYtpp, LDH_D, UREAtpp
1623	-58.8846	EX_succ_e	7.97599	-7.5	0.157559	7	34.9228	-10.6764	-2.79929	27.7291	9.99301	b3844, b0010, b2913, b4115, b3927, b1380, b1391	ACt2rpp, AHGDx, ARGAGMt7pp, ARHGDx, FADRx, FE3Ri, FLVRx, GLYALDtpp, GLYtpp, LDH_D, PACCOAE, PGCD, UREAtpp
1624	-58.8846	EX_succ_e	7.97599	-7.5	0.157559	7	34.9228	-10.6764	-2.79929	27.7291	9.99301	b3844, b4117, b2441, b0010, b4033, b3927, b1380	14GLUCANabcpp, ACt2rpp, ARGDC, ETHAAL, FADRx, FE3Ri, FLVRx, GLYALDtpp, GLYtpp, LDH_D, MALTHXabcpp, MALTPTabcpp, MALTTRabcpp, MALTTTRabcpp, MALTabcpp, UREAtpp
1625	-58.8846	EX_succ_e	7.97599	-7.5	0.157559	7	34.9228	-10.6764	-2.79929	27.7291	9.99301	b3844, b1226, b0010, b4115, b3927, b1380, b1514	ACt2rpp, AI2abcpp, ARGAGMt7pp, FADRx, FE3Ri, FLVRx, GLYALDtpp, GLYtpp, LDH_D, UREAtpp
1626	-58.8846	EX_succ_e	7.97599	-7.5	0.157559	7	34.9228	-10.6764	-2.79929	27.7291	9.99301	b3844, b4117, b1302, b0010, b3927, b1380, b1514	ACt2rpp, AI2abcpp, ARGDC, FADRx, FE3Ri, FLVRx, GLYALDtpp, GLYtpp, LDH_D, UREAtpp
1627	-58.8846	EX_succ_e	7.97599	-7.5	0.157559	7	34.9228	-10.6764	-2.79929	27.7291	9.99301	b3788, b3844, b0010, b4115, b3927, b1380, b1516	ACt2rpp, AI2abcpp, ARGAGMt7pp, FADRx, FE3Ri, FLVRx, GLYALDtpp, GLYtpp, LDH_D, UREAtpp
1628	-58.8846	EX_succ_e	7.97599	-7.5	0.157559	7	34.9228	-10.6764	-2.79929	27.7291	9.99301	b3844, b4117, b0010, b3927, b1528, b1380, b4268	ACt2rpp, ARBt3ipp, ARGDC, FADRx, FE3Ri, FLVRx, GLYALDtpp, GLYtpp, LDH_D, MELIBt3ipp, UREAtpp
1629	-58.8846	EX_succ_e	7.97599	-7.5	0.157559	7	34.9228	-10.6764	-2.79929	27.7291	9.99301	b3844, b4117, b0010, b3927, b1528, b1380, b2987	ACt2rpp, ARBt3ipp, ARGDC, FADRx, FE3Ri, FLVRx, GLYALDtpp, GLYtpp, LDH_D, MELIBt3ipp, UREAtpp
1630	-58.8846	EX_succ_e	7.97599	-7.5	0.157559	7	34.9228	-10.6764	-2.79929	27.7291	9.99301	b3844, b4117, b0010, b3927, b1528, b1380, b3715	ACt2rpp, ARBt3ipp, ARGDC, FADRx, FE3Ri, FLVRx, GLYALDtpp, GLYtpp, LDH_D, MELIBt3ipp, UREAtpp
1631	-58.8846	EX_succ_e	7.97599	-7.5	0.157559	7	34.9228	-10.6764	-2.79929	27.7291	9.99301	b3844, b2582, b4117, b0010, b3927, b1380, b0007	ACt2rpp, ALAt4pp, ARGDC, FADRx, FE3Ri, FLVRx, GLYALDtpp, GLYt4pp, GLYtpp, LDH_D, UREAtpp
1632	-58.8846	EX_succ_e	7.97599	-7.5	0.157559	7	34.9228	-10.6764	-2.79929	27.7291	9.99301	b3844, b4117, b0010, b3927, b1380, b0269, b0007	ACt2rpp, ALAt4pp, ARGDC, FADRx, FE3Ri, FLVRx, GLYALDtpp, GLYt4pp, GLYtpp, LDH_D, UREAtpp
1633	-58.8846	EX_succ_e	7.97599	-7.5	0.157559	7	34.9228	-10.6764	-2.79929	27.7291	9.99301	b3844, b4117, b2291, b0010, b1900, b3927, b1380	ACt2rpp, ARBabcpp, ARGDC, FADRx, FE3Ri, FLVRx, GLYALDtpp, GLYtpp, LDH_D, UREAtpp
1634	-58.8846	EX_succ_e	7.97599	-7.5	0.157559	7	34.9228	-10.6764	-2.79929	27.7291	9.99301	b3844, b0010, b4115, b4460, b1469, b3927, b1380	ACt2rpp, ARBabcpp, ARGAGMt7pp, FADRx, FE3Ri, FLVRx, GLYALDtpp, GLYtpp, LDH_D, UREAtpp
1635	-58.8846	EX_succ_e	7.97599	-7.5	0.157559	7	34.9228	-10.6764	-2.79929	27.7291	9.99301	b3844, b4117, b0010, b1901, b4230, b3927, b1380	ACt2rpp, ARBabcpp, ARGDC, FADRx, FE3Ri, FLVRx, GLYALDtpp, GLYtpp, LDH_D, UREAtpp
1636	-58.8846	EX_succ_e	7.97599	-7.5	0.157559	7	34.9228	-10.6764	-2.79929	27.7291	9.99301	b3844, b4117, b0386, b0010, b4464, b3927, b1380	ACt2rpp, ARGDC, FADRx, FE3Ri, FLVRx, GLYALDtpp, GLYtpp, LDH_D, P5CR, UREAtpp
1637	-58.8846	EX_succ_e	7.97599	-7.5	0.157559	7	34.9228	-10.6764	-2.79929	27.7291	9.99301	b3844, b0394, b4039, b0010, b4115, b3927, b1380	ACt2rpp, ARGAGMt7pp, FADRx, FE3Ri, FLVRx, GLYALDtpp, GLYtpp, HEX7, LDH_D, UREAtpp
1638	-58.8846	EX_succ_e	7.97599	-7.5	0.157559	7	34.9228	-10.6764	-2.79929	27.7291	9.99301	b3844, b0828, b2022, b0010, b4115, b3927, b1380	ACt2rpp, ARGAGMt7pp, FADRx, FE3Ri, FLVRx, GLYALDtpp, GLYtpp, HISTP, IGPDH, LDH_D, UREAtpp
1639	-58.8846	EX_succ_e	7.97599	-7.5	0.157559	7	34.9228	-10.6764	-2.79929	27.7291	9.99301	b3844, b4117, b3575, b2019, b0010, b3927, b1380	ACt2rpp, ARGDC, ATPPRT, DOGULNR, FADRx, FE3Ri, FLVRx, GLYALDtpp, GLYtpp, LDH_D, UREAtpp
1640	-58.8846	EX_succ_e	7.97599	-7.5	0.157559	7	34.9228	-10.6764	-2.79929	27.7291	9.99301	b3844, b4117, b3946, b1623, b0010, b3927, b1380	ACt2rpp, ADA, ARGDC, DADA, FADRx, FE3Ri, FLVRx, GLYALDtpp, GLYtpp, LDH_D, UREAtpp
1641	-58.8846	EX_succ_e	7.97599	-7.5	0.157559	7	34.9228	-10.6764	-2.79929	27.7291	9.99301	b3844, b4117, b0010, b4072, b2149, b3927, b1380	ACt2rpp, ARGDC, FADRx, FE3Ri, FLVRx, GLCabcpp, GLYALDtpp, GLYtpp, LDH_D, NTRIR3pp, NTRIR4pp, UREAtpp
1642	-58.8846	EX_succ_e	7.97599	-7.5	0.157559	7	34.9228	-10.6764	-2.79929	27.7291	9.99301	b3844, b1493, b0010, b4115, b3927, b1380, b1396	ACt2rpp, ARGAGMt7pp, FADRx, FE3Ri, FLVRx, GLYALDtpp, GLYtpp, HPACOAT, LDH_D, PACOAT, UREAtpp
1643	-58.8846	EX_succ_e	7.97599	-7.5	0.157559	7	34.9228	-10.6764	-2.79929	27.7291	9.99301	b3844, b4117, b0010, b3927, b1380, b1396, b2963	ACt2rpp, ARGDC, FADRx, FE3Ri, FLVRx, GLYALDtpp, GLYtpp, HPACOAT, LDH_D, PACOAT, UREAtpp
1644	-58.8846	EX_succ_e	7.97599	-7.5	0.157559	7	34.9228	-10.6764	-2.79929	27.7291	9.99301	b3844, b4117, b0010, b2721, b3927, b1380, b1396	ACt2rpp, ARGDC, FADRx, FE3Ri, FLVRx, GLYALDtpp, GLYtpp, HPACOAT, LDH_D, PACOAT, UREAtpp
1645	-58.8846	EX_succ_e	7.97599	-7.5	0.157559	7	34.9228	-10.6764	-2.79929	27.7291	9.99301	b3926, b3844, b4117, b0010, b3927, b1380, b0805	ACt2rpp, ARGDC, FADRx, FE3Ri, FLVRx, GLYALDtpp, GLYK, GLYtpp, LDH_D, UREAtpp
1646	-58.8846	EX_succ_e	7.97599	-7.5	0.157559	7	34.9228	-10.6764	-2.79929	27.7291	9.99301	b3926, b3844, b4117, b0010, b2422, b3927, b1380	ACt2rpp, ARGDC, FADRx, FE3Ri, FLVRx, GLYALDtpp, GLYK, GLYtpp, LDH_D, SELabcpp, SLNTabcpp, TSULabcpp, UREAtpp
1647	-58.8846	EX_succ_e	7.97599	-7.5	0.157559	7	34.9228	-10.6764	-2.79929	27.7291	9.99301	b2599, b3844, b4117, b0010, b3213, b3927, b1380	ACt2rpp, ARGDC, FADRx, FE3Ri, FLVRx, GLUSy, GLYALDtpp, GLYtpp, LDH_D, PPNDH, UREAtpp
1648	-58.8846	EX_succ_e	7.97599	-7.5	0.157559	7	34.9228	-10.6764	-2.79929	27.7291	9.99301	b3844, b4117, b2903, b0010, b0343, b3927, b1380	ACt2rpp, ARGDC, FADRx, FE3Ri, FLVRx, GLYALDtpp, GLYCL, GLYtpp, LCTStpp, LDH_D, UREAtpp
1649	-58.8846	EX_succ_e	7.97599	-7.5	0.157559	7	34.9228	-10.6764	-2.79929	27.7291	9.99301	b3844, b0010, b3578, b2587, b4115, b3927, b1380	23DOGULNt4pp, ACt2rpp, AKGt2rpp, ARGAGMt7pp, FADRx, FE3Ri, FLVRx, GLYALDtpp, GLYtpp, LDH_D, UREAtpp, XYLUt2pp
1650	-58.8846	EX_succ_e	7.97599	-7.5	0.157559	7	34.9228	-10.6764	-2.79929	27.7291	9.99301	b3844, b4117, b0614, b0010, b1246, b3927, b1380	ACt2rpp, ARGDC, CITL, FADRx, FE3Ri, FLVRx, GLYALDtpp, GLYtpp, LDH_D, UREAtpp
1651	-58.8846	EX_succ_e	7.97599	-7.5	0.157559	7	34.9228	-10.6764	-2.79929	27.7291	9.99301	b2716, b3844, b4117, b0617, b0010, b3927, b1380	ACt2rpp, ARGDC, CITL, FADRx, FE3Ri, FLVRx, GLYALDtpp, GLYtpp, LDH_D, UREAtpp
1652	-58.8846	EX_succ_e	7.97599	-7.5	0.157559	7	34.9228	-10.6764	-2.79929	27.7291	9.99301	b3844, b4117, b0617, b0010, b1250, b3927, b1380	ACt2rpp, ARGDC, CITL, FADRx, FE3Ri, FLVRx, GLYALDtpp, GLYtpp, LDH_D, UREAtpp
1653	-58.8846	EX_succ_e	7.97599	-7.5	0.157559	7	34.9228	-10.6764	-2.79929	27.7291	9.99301	b4481, b3844, b4117, b0010, b3927, b1380, b1330	AADDGT, ACt2rpp, ARGDC, FADRx, FE3Ri, FLVRx, GLYALDtpp, GLYtpp, LDH_D, UREAtpp
1654	-58.8846	EX_succ_e	7.97599	-7.5	0.157559	7	34.9228	-10.6764	-2.79929	27.7291	9.99301	b3844, b4117, b0010, b0367, b3631, b3927, b1380	ACt2rpp, ARGDC, FADRx, FE3Ri, FLVRx, GLCTR1, GLYALDtpp, GLYtpp, LDH_D, TAURabcpp, UREAtpp
1655	-58.8846	EX_succ_e	7.97599	-7.5	0.157559	7	34.9228	-10.6764	-2.79929	27.7291	9.99301	b1732, b3844, b0010, b4115, b3622, b3927, b1380	ACt2rpp, ARGAGMt7pp, ECA4OALpp, FADRx, FE3Ri, FLVRx, GLYALDtpp, GLYtpp, LDH_D, O16A4Lpp, UREAtpp
1656	-58.8846	EX_succ_e	7.97599	-7.5	0.157559	7	34.9228	-10.6764	-2.79929	27.7291	9.99301	b3844, b4117, b0010, b3630, b3927, b1380, b3623	ACt2rpp, ARGDC, FADRx, FE3Ri, FLVRx, GLYALDtpp, GLYtpp, HEPK1, HEPT4, LDH_D, UREAtpp
1657	-58.8846	EX_succ_e	7.97599	-7.5	0.157559	7	34.9228	-10.6764	-2.79929	27.7291	9.99301	b3844, b4117, b3551, b0010, b3628, b3927, b1380	ACt2rpp, ARGDC, BSORx, BSORy, FADRx, FE3Ri, FLVRx, GALT1, GLYALDtpp, GLYtpp, LDH_D, UREAtpp
1658	-58.8846	EX_succ_e	7.97599	-7.5	0.157559	7	34.9228	-10.6764	-2.79929	27.7291	9.99301	b3794, b3844, b4117, b0010, b1761, b3927, b1380	ACMAMUT, ACt2rpp, ARGDC, FADRx, FE3Ri, FLVRx, GLYALDtpp, GLYtpp, LDH_D, UREAtpp
1659	-58.8846	EX_succ_e	7.97599	-7.5	0.157559	7	34.9228	-10.6764	-2.79929	27.7291	9.99301	b3670, b3844, b0010, b4115, b3927, b1380, b0432	ACt2rpp, ARGAGMt7pp, CYTBO3_4pp, FADRx, FE3Ri, FLVRx, GLYALDtpp, GLYtpp, LDH_D, UREAtpp
1660	-58.8846	EX_succ_e	7.97599	-7.5	0.157559	7	34.9228	-10.6764	-2.79929	27.7291	9.99301	b3844, b0010, b0066, b4115, b3927, b1380, b0432	ACt2rpp, ARGAGMt7pp, CYTBO3_4pp, FADRx, FE3Ri, FLVRx, GLYALDtpp, GLYtpp, LDH_D, THMabcpp, UREAtpp
1661	-58.8846	EX_succ_e	7.97599	-7.5	0.157559	7	34.9228	-10.6764	-2.79929	27.7291	9.99301	b3844, b4117, b4197, b0010, b3927, b1380, b1488	ACt2rpp, ALAALAD, ARGDC, FADRx, FE3Ri, FLVRx, GLYALDtpp, GLYtpp, LDH_D, UREAtpp
1662	-58.8846	EX_succ_e	7.97599	-7.5	0.157559	7	34.9228	-10.6764	-2.79929	27.7291	9.99301	b0963, b3844, b3957, b0010, b4115, b3927, b1380	ACODA, ACt2rpp, ARGAGMt7pp, FADRx, FE3Ri, FLVRx, GLYALDtpp, GLYtpp, LDH_D, MGSA, UREAtpp
1663	-58.8846	EX_succ_e	7.97599	-7.5	0.157559	7	34.9228	-10.6764	-2.79929	27.7291	9.99301	b3844, b4117, b3575, b0010, b1298, b3927, b1380	ACt2rpp, ARGDC, DOGULNR, FADRx, FE3Ri, FLVRx, GGGABAH, GLYALDtpp, GLYtpp, LDH_D, UREAtpp
1664	-58.8846	EX_succ_e	7.97599	-7.5	0.157559	7	34.9228	-10.6764	-2.79929	27.7291	9.99301	b3844, b0010, b4115, b1298, b3927, b1380, b2924	ACt2rpp, ARGAGMt7pp, FADRx, FE3Ri, FLVRx, GGGABAH, GLYALDtpp, GLYtpp, LDH_D, UREAtpp
1665	-58.8846	EX_succ_e	7.97599	-7.5	0.157559	7	34.9228	-10.6764	-2.79929	27.7291	9.99301	b3011, b3844, b4117, b0010, b1300, b3927, b1380	13PPDH2, 3HPADHi, ACt2rpp, ARGDC, FADRx, FE3Ri, FLVRx, GGGABADr, GLYALDtpp, GLYtpp, LDH_D, UREAtpp
1666	-58.8846	EX_succ_e	7.97599	-7.5	0.157559	7	34.9228	-10.6764	-2.79929	27.7291	9.99301	b3844, b4117, b0010, b3927, b2170, b1380, b1301	ACt2rpp, ARGDC, FADRx, FE3Ri, FLVRx, GGPTRCO, GLYALDtpp, GLYtpp, LDH_D, UREAtpp
1667	-58.8846	EX_succ_e	7.97599	-7.5	0.157559	7	34.9228	-10.6764	-2.79929	27.7291	9.99301	b3844, b0010, b4115, b3927, b3825, b1380, b1592	ACt2rpp, ARGAGMt7pp, CLtipp, FADRx, FE3Ri, FLVRx, GLYALDtpp, GLYtpp, LDH_D, LPLIPAL2A120, LPLIPAL2A140, LPLIPAL2A141, LPLIPAL2A160, LPLIPAL2A161, LPLIPAL2A180, LPLIPAL2A181, LPLIPAL2ATE120, LPLIPAL2ATE140, LPLIPAL2ATE141, LPLIPAL2ATE160, LPLIPAL2ATE161, LPLIPAL2ATE180, LPLIPAL2ATE181, LPLIPAL2ATG120, LPLIPAL2ATG140, LPLIPAL2ATG141, LPLIPAL2ATG160, LPLIPAL2ATG161, LPLIPAL2ATG180, LPLIPAL2ATG181, L…
1668	-58.8846	EX_succ_e	7.97599	-7.5	0.157559	7	34.9228	-10.6764	-2.79929	27.7291	9.99301	b3844, b1747, b0010, b4115, b3927, b1380, b1301	ACt2rpp, ARGAGMt7pp, AST, FADRx, FE3Ri, FLVRx, GGPTRCO, GLYALDtpp, GLYtpp, LDH_D, UREAtpp
1669	-58.8846	EX_succ_e	7.97599	-7.5	0.157559	7	34.9228	-10.6764	-2.79929	27.7291	9.99301	b3844, b4117, b0010, b1654, b0698, b3927, b1380	ACt2rpp, ARGDC, FADRx, FE3Ri, FLVRx, GLYALDtpp, GLYtpp, Kabcpp, LDH_D, UREAtpp
1670	-58.8846	EX_succ_e	7.97599	-7.5	0.157559	7	34.9228	-10.6764	-2.79929	27.7291	9.99301	b3844, b3137, b0010, b4115, b0696, b3927, b1380	ACt2rpp, ARGAGMt7pp, FADRx, FE3Ri, FLVRx, GLYALDtpp, GLYtpp, Kabcpp, LDH_D, UREAtpp
1671	-58.8846	EX_succ_e	7.97599	-7.5	0.157559	7	34.9228	-10.6764	-2.79929	27.7291	9.99301	b0945, b3844, b4117, b0010, b3927, b1380, b1484	ACt2rpp, ARGDC, DHORD2, DHORD5, FADRx, FE3Ri, FLVRx, GLYALDtpp, GLYtpp, LDH_D, UREAtpp
1672	-58.8846	EX_succ_e	7.97599	-7.5	0.157559	7	34.9228	-10.6764	-2.79929	27.7291	9.99301	b3844, b0004, b0010, b4115, b3927, b1380, b0269	ACt2rpp, ARGAGMt7pp, FADRx, FE3Ri, FLVRx, GLYALDtpp, GLYtpp, LDH_D, THRS, UREAtpp
1673	-58.8846	EX_succ_e	7.97599	-7.5	0.157559	7	34.9228	-10.6764	-2.79929	27.7291	9.99301	b3844, b4117, b3946, b0010, b3927, b1380, b1385	ACt2rpp, ALDD19xr, ARGDC, FADRx, FE3Ri, FLVRx, GLYALDtpp, GLYtpp, LDH_D, UREAtpp
1674	-58.8846	EX_succ_e	7.97599	-7.5	0.157559	7	34.9228	-10.6764	-2.79929	27.7291	9.99301	b3844, b0937, b0758, b0010, b4115, b3927, b1380	ACt2rpp, ARGAGMt7pp, FADRx, FE3Ri, FLVRx, FMNRx, GLYALDtpp, GLYtpp, LDH_D, UGLT, UREAtpp
1675	-58.8846	EX_succ_e	7.97599	-7.5	0.157559	7	34.9228	-10.6764	-2.79929	27.7291	9.99301	b2243, b3844, b3575, b0010, b4115, b3927, b1380	ACt2rpp, ARGAGMt7pp, DOGULNR, FADRx, FE3Ri, FLVRx, G3PD6, G3PD7, GLYALDtpp, GLYtpp, LDH_D, UREAtpp
1676	-58.8846	EX_succ_e	7.97599	-7.5	0.157559	7	34.9228	-10.6764	-2.79929	27.7291	9.99301	b2241, b2341, b3844, b4117, b0010, b3927, b1380	ACt2rpp, ARGDC, FADRx, FE3Ri, FLVRx, G3PD6, G3PD7, GLYALDtpp, GLYtpp, LDH_D, UREAtpp
1677	-58.8846	EX_succ_e	7.97599	-7.5	0.157559	7	34.9228	-10.6764	-2.79929	27.7291	9.99301	b3844, b4117, b0010, b3006, b3927, b1380, b2175	4PCPpp, ACt2rpp, ADOCBLtonex, AGM4PCPpp, ARGDC, CBItonex, CBL1tonex, CPGNtonex, FADRx, FE3DCITtonex, FE3DHBZStonex, FE3HOXtonex, FE3Ri, FECRMtonex, FEENTERtonex, FEOXAMtonex, FLVRx, GLYALDtpp, GLYtpp, LDH_D, UREAtpp
1678	-58.8846	EX_succ_e	7.97599	-7.5	0.157559	7	34.9228	-10.6764	-2.79929	27.7291	9.99301	b3844, b4117, b0010, b4464, b3927, b1380, b0516	ACt2rpp, ALLTAMH2, ARGDC, FADRx, FE3Ri, FLVRx, GLYALDtpp, GLYtpp, LDH_D, UREAtpp
1679	-58.8846	EX_succ_e	7.97599	-7.5	0.157559	7	34.9228	-10.6764	-2.79929	27.7291	9.99301	b3844, b3223, b4117, b0010, b3927, b1380, b0516	ACt2rpp, ALLTAMH2, AMANAPEr, ARGDC, FADRx, FE3Ri, FLVRx, GLYALDtpp, GLYtpp, LDH_D, UREAtpp
1680	-58.8846	EX_succ_e	7.97599	-7.5	0.157559	7	34.9228	-10.6764	-2.79929	27.7291	9.99301	b3844, b0010, b4115, b1533, b3927, b1380, b3930	ACt2rpp, ARGAGMt7pp, DHNAOT4, FADRx, FE3Ri, FLVRx, GLYALDtpp, GLYtpp, LDH_D, SERtpp, UREAtpp
1681	-58.8846	EX_succ_e	7.97599	-7.5	0.157559	7	34.9228	-10.6764	-2.79929	27.7291	9.99301	b3844, b3124, b4117, b2903, b0010, b3927, b1380	ACt2rpp, ARGDC, FADRx, FE3Ri, FLVRx, GLYALDtpp, GLYCK2, GLYCL, GLYtpp, LDH_D, UREAtpp
1682	-58.8846	EX_succ_e	7.97599	-7.5	0.157559	7	34.9228	-10.6764	-2.79929	27.7291	9.99301	b3844, b0411, b0010, b2587, b4115, b3927, b1380	ACt2rpp, ADNtex, AKGt2rpp, ARGAGMt7pp, DADNtex, DCYTtex, DURItex, FADRx, FE3Ri, FLVRx, GLYALDtpp, GLYtpp, GUAtex, INStex, LDH_D, UREAtpp, URItex
1683	-58.8846	EX_succ_e	7.97599	-7.5	0.157559	7	34.9228	-10.6764	-2.79929	27.7291	9.99301	b3844, b4117, b0010, b4193, b3452, b3927, b1380	ACt2rpp, ARGDC, ASCBptspp, FADRx, FE3Ri, FLVRx, G3PCabcpp, G3PEabcpp, G3PGabcpp, G3PIabcpp, G3PSabcpp, GLYALDtpp, GLYC2Pabcpp, GLYC3Pabcpp, GLYtpp, LDH_D, UREAtpp
1684	-58.8846	EX_succ_e	7.97599	-7.5	0.157559	7	34.9228	-10.6764	-2.79929	27.7291	9.99301	b3844, b0010, b1711, b4115, b3453, b3927, b1380	ACt2rpp, ADOCBLabcpp, ARGAGMt7pp, CBIuabcpp, CBL1abcpp, FADRx, FE3Ri, FLVRx, G3PCabcpp, G3PEabcpp, G3PGabcpp, G3PIabcpp, G3PSabcpp, GLYALDtpp, GLYC2Pabcpp, GLYC3Pabcpp, GLYtpp, LDH_D, UREAtpp
1685	-58.8846	EX_succ_e	7.97599	-7.5	0.157559	7	34.9228	-10.6764	-2.79929	27.7291	9.99301	b3844, b4117, b3248, b0010, b3451, b3927, b1380	ACt2rpp, ARGDC, FADRx, FE3Ri, FLVRx, G3PCabcpp, G3PEabcpp, G3PGabcpp, G3PIabcpp, G3PSabcpp, GLYALDtpp, GLYC2Pabcpp, GLYC3Pabcpp, GLYtpp, LDH_D, UREAtpp
1686	-58.8846	EX_succ_e	7.97599	-7.5	0.157559	7	34.9228	-10.6764	-2.79929	27.7291	9.99301	b3844, b4117, b0010, b3452, b3927, b1380, b3722	ACt2rpp, ARGDC, FADRx, FE3Ri, FLVRx, G3PCabcpp, G3PEabcpp, G3PGabcpp, G3PIabcpp, G3PSabcpp, GLYALDtpp, GLYC2Pabcpp, GLYC3Pabcpp, GLYtpp, LDH_D, UREAtpp
1687	-58.8846	EX_succ_e	7.97599	-7.5	0.157558	7	34.9228	-10.6764	-2.79929	27.7291	9.993	b3844, b0010, b4115, b3927, b1380, b3816, b1393	ACt2rpp, ARGAGMt7pp, DHACOAH, FADRx, FE3Ri, FLVRx, GLYALDtpp, GLYtpp, LDH_D, MG2tpp, NI2tpp, UREAtpp
1688	-58.8846	EX_succ_e	7.97599	-7.5	0.157558	7	34.9228	-10.6764	-2.79929	27.7291	9.99299	b3844, b0907, b4117, b1982, b0010, b3927, b1380	ACt2rpp, AMPN, ARGDC, FADRx, FE3Ri, FLVRx, GLYALDtpp, GLYtpp, LDH_D, OHPBAT, PSERT, UREAtpp
1689	-58.8846	EX_succ_e	7.97599	-7.5	0.157558	7	34.9228	-10.6764	-2.79929	27.7291	9.99299	b0493, b3844, b4117, b0010, b2320, b3927, b1380	ACt2rpp, ARGDC, FADRx, FE3Ri, FLVRx, GLYALDtpp, GLYtpp, LDH_D, PERD, UREAtpp
1690	-58.8846	EX_succ_e	7.97599	-7.5	0.157558	7	34.9228	-10.6764	-2.79929	27.7291	9.99299	b3844, b0907, b4117, b0010, b3927, b1380, b1090	ACPPAT120, ACPPAT140, ACPPAT141, ACPPAT160, ACPPAT161, ACPPAT180, ACPPAT181, ACt2rpp, ARGDC, FADRx, FE3Ri, FLVRx, GLYALDtpp, GLYtpp, LDH_D, OHPBAT, PSERT, UREAtpp
1691	-58.8845	EX_succ_e	7.97599	-7.5	0.157558	7	34.9227	-10.6764	-2.79929	27.729	9.99299	b3844, b4117, b0010, b3927, b1380, b4298, b1518	ACt2rpp, ARGDC, FADRx, FE3Ri, FLVRx, GLYALDtpp, GLYtpp, LDH_D, PAI2I, UREAtpp
1692	-58.8845	EX_succ_e	7.97599	-7.5	0.157558	7	34.9227	-10.6764	-2.79929	27.729	9.99299	b3844, b4117, b3061, b0010, b3927, b1380, b1518	ACt2rpp, ARGDC, FADRx, FE3Ri, FLVRx, GLYALDtpp, GLYtpp, LDH_D, PAI2I, TARTD, UREAtpp
1693	-58.8836	EX_succ_e	7.97599	-7.5	0.157559	5	34.9228	-11.0784	-2.79929	27.7291	9.99301	b4117, b0010, b4132, b3927, b1380	ACt2rpp, ARGDC, CADVtpp, GLYALDtpp, GLYtpp, LDH_D, UREAtpp
1694	-58.8836	EX_succ_e	7.97599	-7.5	0.157559	5	34.9228	-11.0784	-2.79929	27.7291	9.99301	b0010, b4115, b4132, b3927, b1380	ACt2rpp, ARGAGMt7pp, CADVtpp, GLYALDtpp, GLYtpp, LDH_D, UREAtpp
1695	-58.8836	EX_succ_e	7.97616	-7.5	0.157438	7	34.9218	-10.6764	-2.7993	27.7291	9.99195	b3844, b0010, b4115, b0112, b1738, b3927, b1380	ACt2rpp, ARGAGMt7pp, CHTBSptspp, FADRx, FE3Ri, FLVRx, GLYALDtpp, GLYtpp, HISt2rpp, LDH_D, UREAtpp
1696	-58.8829	EX_succ_e	7.97599	-7.5	0.157559	5	34.9228	-11.0799	-2.79929	27.7291	9.99301	b1602, b0010, b4115, b3927, b1380	ACt2rpp, ARGAGMt7pp, GLYALDtpp, GLYtpp, LDH_D, THD2pp, UREAtpp
1697	-58.8829	EX_succ_e	7.97599	-7.5	0.157559	5	34.9228	-11.0799	-2.79929	27.7291	9.99301	b4117, b0010, b1186, b3927, b1380	ACt2rpp, ARGDC, GLYALDtpp, GLYtpp, LDH_D, NAt3_1p5pp, UREAtpp
1698	-58.8829	EX_succ_e	7.97599	-7.5	0.157559	5	34.9228	-11.0799	-2.79929	27.7291	9.99301	b4117, b0010, b4367, b3927, b1380	ACt2rpp, ARGDC, FEOXAMR1, FEOXAMR2, FEOXAMR3, GLYALDtpp, GLYtpp, LDH_D, UREAtpp
1699	-58.8829	EX_succ_e	7.97599	-7.5	0.157559	5	34.9228	-11.0799	-2.79929	27.7291	9.99301	b2988, b0010, b4115, b3927, b1380	ACt2rpp, ARGAGMt7pp, GLYALDtpp, GLYtpp, GSPMDA, GSPMDS, LDH_D, UREAtpp
1700	-58.8829	EX_succ_e	7.97599	-7.5	0.157559	5	34.9228	-11.0799	-2.79929	27.7291	9.99301	b0010, b4115, b3927, b1380, b2923	ACt2rpp, ARGAGMt7pp, ARGt3pp, GLYALDtpp, GLYtpp, LDH_D, UREAtpp
1701	-58.8829	EX_succ_e	7.97599	-7.5	0.157559	5	34.9228	-11.0799	-2.79929	27.7291	9.99301	b4117, b2803, b0010, b3927, b1380	ACt2rpp, ARGDC, FCLK, GLYALDtpp, GLYtpp, LDH_D, UREAtpp
1702	-58.8829	EX_succ_e	7.97599	-7.5	0.157559	5	34.9228	-11.0799	-2.79929	27.7291	9.99301	b4117, b0010, b0931, b3927, b1380	ACt2rpp, ARGDC, GLYALDtpp, GLYtpp, LDH_D, NAMNPP, UREAtpp
1703	-58.8829	EX_succ_e	7.97599	-7.5	0.157559	5	34.9228	-11.0799	-2.79929	27.7291	9.99301	b0010, b4115, b3927, b1380, b2467	ACt2rpp, ARGAGMt7pp, GDPMNP, GLYALDtpp, GLYtpp, LDH_D, UREAtpp
1704	-58.8829	EX_succ_e	7.97599	-7.5	0.157559	5	34.9228	-11.0799	-2.79929	27.7291	9.99301	b0010, b2587, b4115, b3927, b1380	ACt2rpp, AKGt2rpp, ARGAGMt7pp, GLYALDtpp, GLYtpp, LDH_D, UREAtpp
1705	-58.8829	EX_succ_e	7.97599	-7.5	0.157559	5	34.9228	-11.0799	-2.79929	27.7291	9.99301	b0758, b0010, b4115, b3927, b1380	ACt2rpp, ARGAGMt7pp, GLYALDtpp, GLYtpp, LDH_D, UGLT, UREAtpp
1706	-58.8829	EX_succ_e	7.97599	-7.5	0.157559	5	34.9228	-11.0799	-2.79929	27.7291	9.99301	b4013, b0010, b4115, b3927, b1380	ACt2rpp, ARGAGMt7pp, GLYALDtpp, GLYtpp, HSST, LDH_D, UREAtpp
1707	-58.8829	EX_succ_e	7.97599	-7.5	0.157559	5	34.9228	-11.0799	-2.79929	27.7291	9.99301	b4117, b0010, b3927, b1380, b4238	ACt2rpp, ARGDC, GLYALDtpp, GLYtpp, LDH_D, RNTR1c2, RNTR2c2, RNTR3c2, RNTR4c2, UREAtpp
1708	-58.8829	EX_succ_e	7.97599	-7.5	0.157559	5	34.9228	-11.0799	-2.79929	27.7291	9.99301	b0010, b4115, b3927, b1380, b4238	ACt2rpp, ARGAGMt7pp, GLYALDtpp, GLYtpp, LDH_D, RNTR1c2, RNTR2c2, RNTR3c2, RNTR4c2, UREAtpp
1709	-58.8829	EX_succ_e	7.97599	-7.5	0.157559	5	34.9228	-11.0799	-2.79929	27.7291	9.99301	b3449, b0010, b4115, b3927, b1380	ACt2rpp, ARGAGMt7pp, GLYALDtpp, GLYtpp, GPDDA1, GPDDA2, GPDDA3, GPDDA4, GPDDA5, LDH_D, UREAtpp
1710	-58.8829	EX_succ_e	7.97599	-7.5	0.157559	5	34.9228	-11.0799	-2.79929	27.7291	9.99301	b0010, b4123, b4115, b3927, b1380	ACt2rpp, ARGAGMt7pp, GLYALDtpp, GLYtpp, LDH_D, SUCTARTtpp, TARTt2_3pp, UREAtpp
1711	-58.8829	EX_succ_e	7.97599	-7.5	0.157559	5	34.9228	-11.0799	-2.79929	27.7291	9.99301	b0010, b4115, b3927, b1380, b1813	ACt2rpp, ARGAGMt7pp, GLYALDtpp, GLYtpp, HPYRP, LDH_D, UREAtpp
1712	-58.8829	EX_succ_e	7.97599	-7.5	0.157559	5	34.9228	-11.0799	-2.79929	27.7291	9.99301	b2341, b4117, b0010, b3927, b1380	ACt2rpp, ARGDC, GLYALDtpp, GLYtpp, LDH_D, UREAtpp
1713	-58.8829	EX_succ_e	7.97599	-7.5	0.157559	5	34.9228	-11.0799	-2.79929	27.7291	9.99301	b0010, b4169, b4115, b3927, b1380	ACt2rpp, ARGAGMt7pp, GLYALDtpp, GLYtpp, LDH_D, UREAtpp
1714	-58.8829	EX_succ_e	7.97599	-7.5	0.157559	5	34.9228	-11.0799	-2.79929	27.7291	9.99301	b0010, b3063, b4115, b3927, b1380	ACt2rpp, ARGAGMt7pp, GLYALDtpp, GLYtpp, LDH_D, TARTRt7pp, UREAtpp
1715	-58.8829	EX_succ_e	7.97599	-7.5	0.157559	5	34.9228	-11.0799	-2.79929	27.7291	9.99301	b4117, b0010, b0047, b3927, b1380	ACt2rpp, ARGDC, GLYALDtpp, GLYtpp, LDH_D, UREAtpp
1716	-58.8829	EX_succ_e	7.97599	-7.5	0.157559	5	34.9228	-11.0799	-2.79929	27.7291	9.99301	b0010, b4115, b1246, b3927, b1380	ACt2rpp, ARGAGMt7pp, GLYALDtpp, GLYtpp, LDH_D, UREAtpp
1717	-58.8829	EX_succ_e	7.97599	-7.5	0.157559	5	34.9228	-11.0799	-2.79929	27.7291	9.99301	b0010, b4115, b0574, b3927, b1380	ACt2rpp, AGt3, ARGAGMt7pp, CUt3, GLYALDtpp, GLYtpp, LDH_D, UREAtpp
1718	-58.8829	EX_succ_e	7.97599	-7.5	0.157559	5	34.9228	-11.0799	-2.79929	27.7291	9.99301	b4117, b0010, b3927, b1380, b4298	ACt2rpp, ARGDC, GLYALDtpp, GLYtpp, LDH_D, UREAtpp
1719	-58.8829	EX_succ_e	7.97599	-7.5	0.157559	5	34.9228	-11.0799	-2.79929	27.7291	9.99301	b0010, b4115, b3927, b1380, b0465	ACt2rpp, ARGAGMt7pp, GLYALDtpp, GLYtpp, LDH_D, UREAtpp
1720	-58.8829	EX_succ_e	7.97599	-7.5	0.157559	5	34.9228	-11.0799	-2.79929	27.7291	9.99301	b4117, b2091, b0010, b3927, b1380	ACt2rpp, ARGDC, GLTPD, GLYALDtpp, GLYtpp, LDH_D, UREAtpp
1721	-58.8829	EX_succ_e	7.97599	-7.5	0.157559	5	34.9228	-11.0799	-2.79929	27.7291	9.99301	b3902, b0010, b4115, b3927, b1380	ACt2rpp, ARGAGMt7pp, GLYALDtpp, GLYtpp, LDH_D, RMPA, UREAtpp
1722	-58.8829	EX_succ_e	7.97599	-7.5	0.157559	5	34.9228	-11.0799	-2.79929	27.7291	9.99301	b4117, b0010, b3927, b1380, b3722	ACt2rpp, ARGDC, GLYALDtpp, GLYtpp, LDH_D, UREAtpp
1723	-58.8829	EX_succ_e	7.97599	-7.5	0.157559	5	34.9228	-11.0799	-2.79929	27.7291	9.99301	b4117, b0010, b0861, b3927, b1380	ACt2rpp, ARGDC, GLYALDtpp, GLYtpp, LDH_D, UREAtpp
1724	-58.8829	EX_succ_e	7.97599	-7.5	0.157559	5	34.9228	-11.0799	-2.79929	27.7291	9.99301	b0010, b4115, b3927, b1380, b1621	ACt2rpp, ARGAGMt7pp, GLYALDtpp, GLYtpp, LDH_D, MALTptspp, UREAtpp
1725	-58.8829	EX_succ_e	7.97599	-7.5	0.157559	5	34.9228	-11.0799	-2.79929	27.7291	9.99301	b1004, b0010, b4115, b3927, b1380	ACt2rpp, ARGAGMt7pp, GLYALDtpp, GLYtpp, LDH_D, UREAtpp
1726	-58.8829	EX_succ_e	7.97599	-7.5	0.157559	5	34.9228	-11.0799	-2.79929	27.7291	9.99301	b0078, b0010, b4115, b3927, b1380	ACt2rpp, ARGAGMt7pp, GLYALDtpp, GLYtpp, LDH_D, UREAtpp
1727	-58.8829	EX_succ_e	7.97599	-7.5	0.157559	5	34.9228	-11.0799	-2.79929	27.7291	9.99301	b4117, b0010, b3927, b1380, b0444	ACt2rpp, ARGDC, CCGS, GLYALDtpp, GLYtpp, LDH_D, UREAtpp
1728	-58.8829	EX_succ_e	7.97599	-7.5	0.157559	5	34.9228	-11.0799	-2.79929	27.7291	9.99301	b3952, b4117, b0010, b3927, b1380	ACt2rpp, ARGDC, GLYALDtpp, GLYtpp, LDH_D, UREAtpp
1729	-58.8829	EX_succ_e	7.97599	-7.5	0.157559	5	34.9228	-11.0799	-2.79929	27.7291	9.99301	b4117, b0010, b4227, b3927, b1380	ACt2rpp, ARGDC, GLYALDtpp, GLYtpp, LDH_D, UREAtpp
1730	-58.8829	EX_succ_e	7.97599	-7.5	0.157559	5	34.9228	-11.0799	-2.79929	27.7291	9.99301	b4117, b0010, b3927, b1380, b1276	ACt2rpp, ARGDC, GLYALDtpp, GLYtpp, LDH_D, UREAtpp
1731	-58.8829	EX_succ_e	7.97599	-7.5	0.157559	5	34.9228	-11.0799	-2.79929	27.7291	9.99301	b2414, b4117, b0010, b3927, b1380	ACt2rpp, ARGDC, GLYALDtpp, GLYtpp, LDH_D, UREAtpp
1732	-58.8829	EX_succ_e	7.97599	-7.5	0.157559	5	34.9228	-11.0799	-2.79929	27.7291	9.99301	b4117, b0010, b0158, b3927, b1380	ACt2rpp, ADOCBLabcpp, ARGDC, CBIuabcpp, CBL1abcpp, GLYALDtpp, GLYtpp, LDH_D, UREAtpp
1733	-58.8829	EX_succ_e	7.97599	-7.5	0.157559	5	34.9228	-11.0799	-2.79929	27.7291	9.99301	b0010, b4115, b3927, b1380, b1734	ACt2rpp, ARGAGMt7pp, GLYALDtpp, GLYtpp, LDH_D, MC6PH, UREAtpp
1734	-58.8829	EX_succ_e	7.97599	-7.5	0.157559	5	34.9228	-11.0799	-2.79929	27.7291	9.99301	b4117, b1466, b0010, b3927, b1380	ACt2rpp, ARGDC, GLYALDtpp, GLYtpp, LDH_D, UREAtpp
1735	-58.8829	EX_succ_e	7.97599	-7.5	0.157559	5	34.9228	-11.0799	-2.79929	27.7291	9.99301	b0010, b4115, b3927, b1380, b2843	ACt2rpp, ARGAGMt7pp, GLYALDtpp, GLYtpp, KDUI, LDH_D, UREAtpp
1736	-58.8829	EX_succ_e	7.97599	-7.5	0.157559	5	34.9228	-11.0799	-2.79929	27.7291	9.99301	b4117, b0675, b0010, b3927, b1380	ACt2rpp, ARGDC, GLYALDtpp, GLYtpp, LDH_D, UREAtpp
1737	-58.8829	EX_succ_e	7.97599	-7.5	0.157559	5	34.9228	-11.0799	-2.79929	27.7291	9.99301	b0010, b4115, b4311, b3927, b1380	ACt2rpp, ARGAGMt7pp, GLYALDtpp, GLYtpp, LDH_D, UREAtpp
1738	-58.8829	EX_succ_e	7.97599	-7.5	0.157559	5	34.9228	-11.0799	-2.79929	27.7291	9.99301	b1224, b0010, b4115, b3927, b1380	ACt2rpp, ARGAGMt7pp, GLYALDtpp, GLYtpp, LDH_D, UREAtpp
1739	-58.8829	EX_succ_e	7.97599	-7.5	0.157559	5	34.9228	-11.0799	-2.79929	27.7291	9.99301	b0010, b4115, b0573, b3927, b1380	ACt2rpp, AGt3, ARGAGMt7pp, CUt3, GLYALDtpp, GLYtpp, LDH_D, UREAtpp
1740	-58.8829	EX_succ_e	7.97599	-7.5	0.157559	5	34.9228	-11.0799	-2.79929	27.7291	9.99301	b0010, b4115, b2169, b3927, b1380	ACt2rpp, ARGAGMt7pp, FRUptspp, GLYALDtpp, GLYtpp, LDH_D, UREAtpp
1741	-58.8829	EX_succ_e	7.97599	-7.5	0.157559	5	34.9228	-11.0799	-2.79929	27.7291	9.99301	b4117, b0010, b2014, b3927, b1380	ACt2rpp, ARGDC, GLYALDtpp, GLYtpp, LDH_D, UREAtpp
1742	-58.8829	EX_succ_e	7.97599	-7.5	0.157559	5	34.9228	-11.0799	-2.79929	27.7291	9.99301	b0010, b4115, b3927, b1380, b0578	ACt2rpp, ARGAGMt7pp, DHPTDNR, DHPTDNRN, GLYALDtpp, GLYtpp, LDH_D, UREAtpp
1743	-58.8829	EX_succ_e	7.97599	-7.5	0.157559	5	34.9228	-11.0799	-2.79929	27.7291	9.99301	b4117, b0010, b3927, b1380, b1519	ACONMT, ACt2rpp, ARGDC, GLYALDtpp, GLYtpp, LDH_D, UREAtpp
1744	-58.8829	EX_succ_e	7.97599	-7.5	0.157559	5	34.9228	-11.0799	-2.79929	27.7291	9.99301	b0010, b3747, b4115, b3927, b1380	ACt2rpp, ARGAGMt7pp, GLYALDtpp, GLYtpp, LDH_D, UREAtpp
1745	-58.8829	EX_succ_e	7.97599	-7.5	0.157559	5	34.9228	-11.0799	-2.79929	27.7291	9.99301	b0010, b4115, b3927, b1380, b3656	ACt2rpp, ARGAGMt7pp, GLYALDtpp, GLYtpp, LDH_D, UREAtpp, XYHDL
1746	-58.8829	EX_succ_e	7.97599	-7.5	0.157559	5	34.9228	-11.0799	-2.79929	27.7291	9.99301	b0010, b4115, b3927, b1380, b0632	ACt2rpp, ARGAGMt7pp, GLYALDtpp, GLYtpp, LDH_D, UREAtpp
1747	-58.8829	EX_succ_e	7.97599	-7.5	0.157559	5	34.9228	-11.0799	-2.79929	27.7291	9.99301	b4117, b0010, b0752, b3927, b1380	ACt2rpp, ARGDC, GLYALDtpp, GLYtpp, LDH_D, UREAtpp
1748	-58.8829	EX_succ_e	7.97599	-7.5	0.157559	5	34.9228	-11.0799	-2.79929	27.7291	9.99301	b0010, b4115, b2253, b3927, b1380	ACt2rpp, ARGAGMt7pp, GLYALDtpp, GLYtpp, LDH_D, UDPKAAT, UREAtpp
1749	-58.8829	EX_succ_e	7.97599	-7.5	0.157559	5	34.9228	-11.0799	-2.79929	27.7291	9.99301	b4117, b0010, b2975, b3927, b1380	ACt2rpp, ARGDC, GLYALDtpp, GLYtpp, LDH_D, UREAtpp
1750	-58.8829	EX_succ_e	7.97599	-7.5	0.157559	5	34.9228	-11.0799	-2.79929	27.7291	9.99301	b4117, b0010, b3739, b3927, b1380	ACt2rpp, ARGDC, GLYALDtpp, GLYtpp, LDH_D, UREAtpp
1751	-58.8829	EX_succ_e	7.97599	-7.5	0.157559	5	34.9228	-11.0799	-2.79929	27.7291	9.99301	b4117, b0010, b3258, b3927, b1380	ACt2rpp, ARGDC, GLYALDtpp, GLYtpp, LDH_D, PNTOt4pp, UREAtpp
1752	-58.8829	EX_succ_e	7.97599	-7.5	0.157559	5	34.9228	-11.0799	-2.79929	27.7291	9.99301	b4117, b0010, b3579, b3927, b1380	23DOGULNt4pp, ACt2rpp, ARGDC, GLYALDtpp, GLYtpp, LDH_D, UREAtpp, XYLUt2pp
1753	-58.8829	EX_succ_e	7.97599	-7.5	0.157559	5	34.9228	-11.0799	-2.79929	27.7291	9.99301	b2727, b0010, b4115, b3927, b1380	ACt2rpp, ARGAGMt7pp, GLYALDtpp, GLYtpp, LDH_D, UREAtpp
1754	-58.8829	EX_succ_e	7.97599	-7.5	0.157559	5	34.9228	-11.0799	-2.79929	27.7291	9.99301	b0010, b4115, b4055, b3927, b1380	ACt2rpp, ARGAGMt7pp, GLYALDtpp, GLYtpp, LDH_D, TYRPpp, UREAtpp
1755	-58.8829	EX_succ_e	7.97599	-7.5	0.157559	5	34.9228	-11.0799	-2.79929	27.7291	9.99301	b0010, b4115, b3927, b1380, b0681	ACt2rpp, ARGAGMt7pp, GLYALDtpp, GLYtpp, LDH_D, UREAtpp
1756	-58.8829	EX_succ_e	7.97599	-7.5	0.157559	5	34.9228	-11.0799	-2.79929	27.7291	9.99301	b0010, b0679, b4115, b3927, b1380	ACt2rpp, ARGAGMt7pp, GLYALDtpp, GLYtpp, LDH_D, UREAtpp
1757	-58.8829	EX_succ_e	7.97599	-7.5	0.157559	5	34.9228	-11.0799	-2.79929	27.7291	9.99301	b4117, b1656, b0010, b3927, b1380	ACt2rpp, ARGDC, GLYALDtpp, GLYtpp, LDH_D, UREAtpp
1758	-58.8829	EX_succ_e	7.97599	-7.5	0.157559	5	34.9228	-11.0799	-2.79929	27.7291	9.99301	b4117, b0010, b0425, b3927, b1380	ACt2rpp, ARGDC, GLYALDtpp, GLYtpp, LDH_D, UREAtpp
1759	-58.8829	EX_succ_e	7.97599	-7.5	0.157559	5	34.9228	-11.0799	-2.79929	27.7291	9.99301	b4117, b0010, b3927, b1380, b2497	ACt2rpp, ARGDC, GLYALDtpp, GLYtpp, LDH_D, UREAtpp
1760	-58.8829	EX_succ_e	7.97599	-7.5	0.157559	5	34.9228	-11.0799	-2.79929	27.7291	9.99301	b0010, b4115, b3927, b1380, b0781	ACt2rpp, ARGAGMt7pp, CPMPS, GLYALDtpp, GLYtpp, LDH_D, UREAtpp
1761	-58.8829	EX_succ_e	7.97599	-7.5	0.157559	5	34.9228	-11.0799	-2.79929	27.7291	9.99301	b2716, b4117, b0010, b3927, b1380	ACt2rpp, ARGDC, GLYALDtpp, GLYtpp, LDH_D, UREAtpp
1762	-58.8829	EX_succ_e	7.97599	-7.5	0.157559	5	34.9228	-11.0799	-2.79929	27.7291	9.99301	b4117, b0010, b0863, b3927, b1380	ACt2rpp, ARGDC, GLYALDtpp, GLYtpp, LDH_D, UREAtpp
1763	-58.8829	EX_succ_e	7.97599	-7.5	0.157559	5	34.9228	-11.0799	-2.79929	27.7291	9.99301	b3789, b0010, b4115, b3927, b1380	ACt2rpp, ARGAGMt7pp, GLYALDtpp, GLYtpp, LDH_D, UREAtpp
1764	-58.8829	EX_succ_e	7.97599	-7.5	0.157559	5	34.9228	-11.0799	-2.79929	27.7291	9.99301	b0010, b4115, b2888, b3927, b1380	ACt2rpp, ARGAGMt7pp, GLYALDtpp, GLYtpp, LDH_D, URATEtpp, UREAtpp
1765	-58.8829	EX_succ_e	7.97599	-7.5	0.157559	5	34.9228	-11.0799	-2.79929	27.7291	9.99301	b0010, b4115, b0854, b3927, b1380	ACt2rpp, ARGAGMt7pp, GLYALDtpp, GLYtpp, LDH_D, UREAtpp
1766	-58.8829	EX_succ_e	7.97599	-7.5	0.157559	5	34.9228	-11.0799	-2.79929	27.7291	9.99301	b1993, b0010, b4115, b3927, b1380	ACBIPGT, ACt2rpp, ADOCBIK, ARGAGMt7pp, GLYALDtpp, GLYtpp, LDH_D, UREAtpp
1767	-58.8829	EX_succ_e	7.97599	-7.5	0.157559	5	34.9228	-11.0799	-2.79929	27.7291	9.99301	b0010, b4115, b4090, b3927, b1380	ACt2rpp, ALLPI, ARGAGMt7pp, GLYALDtpp, GLYtpp, LDH_D, UREAtpp
1768	-58.8829	EX_succ_e	7.97599	-7.5	0.157559	5	34.9228	-11.0799	-2.79929	27.7291	9.99301	b4117, b4352, b0010, b3927, b1380	ACt2rpp, ARGDC, GLYALDtpp, GLYtpp, LDH_D, UREAtpp
1769	-58.8829	EX_succ_e	7.97599	-7.5	0.157559	5	34.9228	-11.0799	-2.79929	27.7291	9.99301	b4117, b0010, b1818, b3927, b1380	2DGLCptspp, ACMANAptspp, ACt2rpp, ARGDC, FRUpts2pp, GAMptspp, GLYALDtpp, GLYtpp, LDH_D, MANptspp, UREAtpp
1770	-58.8829	EX_succ_e	7.97599	-7.5	0.157559	5	34.9228	-11.0799	-2.79929	27.7291	9.99301	b0010, b4115, b2484, b3927, b1380	ACt2rpp, ARGAGMt7pp, GLYALDtpp, GLYtpp, LDH_D, UREAtpp
1771	-58.8829	EX_succ_e	7.97599	-7.5	0.157559	5	34.9228	-11.0799	-2.79929	27.7291	9.99301	b4117, b0010, b3927, b1380, b4356	ACt2rpp, ARGDC, GALCTNLt2pp, GLYALDtpp, GLYtpp, LDH_D, UREAtpp
1772	-58.8829	EX_succ_e	7.97599	-7.5	0.157559	5	34.9228	-11.0799	-2.79929	27.7291	9.99301	b0010, b4115, b1197, b3927, b1380	ACt2rpp, ARGAGMt7pp, GLYALDtpp, GLYtpp, LDH_D, TREHpp, UREAtpp
1773	-58.8829	EX_succ_e	7.97599	-7.5	0.157559	5	34.9228	-11.0799	-2.79929	27.7291	9.99301	b4117, b0010, b3927, b1380, b2010	ACt2rpp, ARGDC, GLYALDtpp, GLYtpp, LDH_D, UREAtpp
1774	-58.8829	EX_succ_e	7.97599	-7.5	0.157559	5	34.9228	-11.0799	-2.79929	27.7291	9.99301	b3925, b4117, b0010, b3927, b1380	ACt2rpp, ARGDC, GLYALDtpp, GLYtpp, LDH_D, UREAtpp
1775	-58.8829	EX_succ_e	7.97599	-7.5	0.157559	5	34.9228	-11.0799	-2.79929	27.7291	9.99301	b3425, b0010, b4115, b3927, b1380	ACt2rpp, ARGAGMt7pp, GLYALDtpp, GLYtpp, LDH_D, UREAtpp
1776	-58.8829	EX_succ_e	7.97599	-7.5	0.157559	5	34.9228	-11.0799	-2.79929	27.7291	9.99301	b2901, b0010, b4115, b3927, b1380	ACt2rpp, ARGAGMt7pp, GLYALDtpp, GLYtpp, LDH_D, UREAtpp
1777	-58.8829	EX_succ_e	7.97599	-7.5	0.157559	5	34.9228	-11.0799	-2.79929	27.7291	9.99301	b0010, b4115, b2177, b3927, b1380	ACt2rpp, ARGAGMt7pp, GLYALDtpp, GLYtpp, LDH_D, UREAtpp
1778	-58.8829	EX_succ_e	7.97599	-7.5	0.157559	5	34.9228	-11.0799	-2.79929	27.7291	9.99301	b4117, b0010, b4115, b3927, b1380	ACt2rpp, ARGAGMt7pp, ARGDC, GLYALDtpp, GLYtpp, LDH_D, UREAtpp
1779	-58.8829	EX_succ_e	7.97599	-7.5	0.157559	5	34.9228	-11.0799	-2.79929	27.7291	9.99301	b0010, b4115, b1442, b3927, b1380	ACt2rpp, ARGAGMt7pp, GLYALDtpp, GLYtpp, LDH_D, UREAtpp
1780	-58.8829	EX_succ_e	7.97599	-7.5	0.157559	5	34.9228	-11.0799	-2.79929	27.7291	9.99301	b0010, b4115, b3927, b1380, b2164	ACt2rpp, ARGAGMt7pp, GLYALDtpp, GLYtpp, LDH_D, PSURItpp, UREAtpp
1781	-58.8829	EX_succ_e	7.97599	-7.5	0.157559	5	34.9228	-11.0799	-2.79929	27.7291	9.99301	b4117, b2173, b0010, b3927, b1380	ACt2rpp, ARGDC, GLYALDtpp, GLYtpp, LDH_D, UREAtpp
1782	-58.8829	EX_succ_e	7.97599	-7.5	0.157559	5	34.9228	-11.0799	-2.79929	27.7291	9.99301	b4117, b0010, b0459, b3927, b1380	ACt2rpp, ARGDC, GLCATr, GLYALDtpp, GLYtpp, LDH_D, MALTATr, UREAtpp
1783	-58.8829	EX_succ_e	7.97599	-7.5	0.157559	5	34.9228	-11.0799	-2.79929	27.7291	9.99301	b0010, b4115, b0936, b3927, b1380	ACt2rpp, ARGAGMt7pp, ETHSO3abcpp, GLYALDtpp, GLYtpp, LDH_D, MSO3abcpp, SULFACabcpp, UREAtpp
1784	-58.8829	EX_succ_e	7.97599	-7.5	0.157559	5	34.9228	-11.0799	-2.79929	27.7291	9.99301	b0010, b3917, b4115, b3927, b1380	ACt2rpp, ARGAGMt7pp, GLYALDtpp, GLYtpp, LDH_D, UREAtpp
1785	-58.8829	EX_succ_e	7.97599	-7.5	0.157559	5	34.9228	-11.0799	-2.79929	27.7291	9.99301	b4117, b0010, b0067, b3927, b1380	ACt2rpp, ARGDC, GLYALDtpp, GLYtpp, LDH_D, THMabcpp, UREAtpp
1786	-58.8829	EX_succ_e	7.97599	-7.5	0.157559	5	34.9228	-11.0799	-2.79929	27.7291	9.99301	b4117, b2738, b0010, b3927, b1380	ACt2rpp, ARGDC, GLYALDtpp, GLYtpp, LDH_D, UREAtpp
1787	-58.8829	EX_succ_e	7.97599	-7.5	0.157559	5	34.9228	-11.0799	-2.79929	27.7291	9.99301	b4117, b0010, b3927, b1380, b4392	ACt2rpp, ARGDC, GLYALDtpp, GLYtpp, LDH_D, UREAtpp
1788	-58.8829	EX_succ_e	7.97599	-7.5	0.157559	5	34.9228	-11.0799	-2.79929	27.7291	9.99301	b4117, b0010, b3927, b1380, b0874	ACt2rpp, ARGDC, GLYALDtpp, GLYtpp, LDH_D, UREAtpp
1789	-58.8829	EX_succ_e	7.97599	-7.5	0.157559	5	34.9228	-11.0799	-2.79929	27.7291	9.99301	b4054, b0010, b4115, b3927, b1380	ACt2rpp, ARGAGMt7pp, GLYALDtpp, GLYtpp, LDH_D, UREAtpp
1790	-58.8829	EX_succ_e	7.97599	-7.5	0.157559	5	34.9228	-11.0799	-2.79929	27.7291	9.99301	b0010, b4260, b4115, b3927, b1380	ACt2rpp, ARGAGMt7pp, GLYALDtpp, GLYtpp, LDH_D, UREAtpp
1791	-58.8829	EX_succ_e	7.97599	-7.5	0.157559	5	34.9228	-11.0799	-2.79929	27.7291	9.99301	b0010, b4115, b3927, b1380, b1006	ACt2rpp, ARGAGMt7pp, GLYALDtpp, GLYtpp, LDH_D, UREAtpp
1792	-58.8829	EX_succ_e	7.97599	-7.5	0.157559	5	34.9228	-11.0799	-2.79929	27.7291	9.99301	b4117, b0010, b2996, b3927, b1380	ACt2rpp, ARGDC, GLYALDtpp, GLYtpp, LDH_D, UREAtpp
1793	-58.8829	EX_succ_e	7.97599	-7.5	0.157559	5	34.9228	-11.0799	-2.79929	27.7291	9.99301	b0010, b4115, b3927, b1380, b1021	ACt2rpp, ARGAGMt7pp, GLYALDtpp, GLYtpp, LDH_D, PUACGAMS, PUACGAMtr, UREAtpp
1794	-58.8829	EX_succ_e	7.97599	-7.5	0.157559	5	34.9228	-11.0799	-2.79929	27.7291	9.99301	b3721, b4117, b0010, b3927, b1380	ACt2rpp, ARGDC, GLYALDtpp, GLYtpp, LDH_D, UREAtpp
1795	-58.8829	EX_succ_e	7.97599	-7.5	0.157559	5	34.9228	-11.0799	-2.79929	27.7291	9.99301	b4117, b0010, b1002, b3927, b1380	ACt2rpp, ARGDC, GAL1PPpp, GLYALDtpp, GLYtpp, LDH_D, UREAtpp
1796	-58.8829	EX_succ_e	7.97599	-7.5	0.157559	5	34.9228	-11.0799	-2.79929	27.7291	9.99301	b2521, b0010, b4115, b3927, b1380	ACt2rpp, ARGAGMt7pp, GLYALDtpp, GLYtpp, LDH_D, MCPST, UREAtpp
1797	-58.8829	EX_succ_e	7.97599	-7.5	0.157559	5	34.9228	-11.0799	-2.79929	27.7291	9.99301	b4117, b0010, b3927, b1380, b0783	ACt2rpp, ARGDC, CPMPS, GLYALDtpp, GLYtpp, LDH_D, UREAtpp
1798	-58.8829	EX_succ_e	7.97599	-7.5	0.157559	5	34.9228	-11.0799	-2.79929	27.7291	9.99301	b4117, b0010, b3927, b1380, b3892	ACt2rpp, ARGDC, GLYALDtpp, GLYtpp, LDH_D, UREAtpp
1799	-58.8829	EX_succ_e	7.97599	-7.5	0.157559	5	34.9228	-11.0799	-2.79929	27.7291	9.99301	b4117, b0010, b3927, b1380, b0314	ACt2rpp, ARGDC, GLYALDtpp, GLYtpp, LDH_D, UREAtpp
1800	-58.8829	EX_succ_e	7.97599	-7.5	0.157559	5	34.9228	-11.0799	-2.79929	27.7291	9.99301	b4117, b0010, b0509, b3927, b1380	ACt2rpp, ARGDC, GLYALDtpp, GLYtpp, LDH_D, UREAtpp
1801	-58.8829	EX_succ_e	7.97599	-7.5	0.157559	5	34.9228	-11.0799	-2.79929	27.7291	9.99301	b4117, b0010, b3927, b2303, b1380	ACt2rpp, ARGDC, DHPTPE, GLYALDtpp, GLYtpp, LDH_D, UREAtpp
1802	-58.8829	EX_succ_e	7.97599	-7.5	0.157559	5	34.9228	-11.0799	-2.79929	27.7291	9.99301	b4117, b0996, b0010, b3927, b1380	ACt2rpp, ARGDC, GLYALDtpp, GLYtpp, LDH_D, UREAtpp
1803	-58.8829	EX_succ_e	7.97599	-7.5	0.157559	5	34.9228	-11.0799	-2.79929	27.7291	9.99301	b0077, b0010, b4115, b3927, b1380	ACt2rpp, ARGAGMt7pp, GLYALDtpp, GLYtpp, LDH_D, UREAtpp
1804	-58.8829	EX_succ_e	7.97599	-7.5	0.157559	5	34.9228	-11.0799	-2.79929	27.7291	9.99301	b4117, b0010, b3927, b1380, b0624	ACt2rpp, ARGDC, Ftpp, GLYALDtpp, GLYtpp, LDH_D, UREAtpp
1805	-58.8829	EX_succ_e	7.97599	-7.5	0.157559	5	34.9228	-11.0799	-2.79929	27.7291	9.99301	b0651, b4117, b0010, b3927, b1380	ACt2rpp, ARGDC, GLYALDtpp, GLYtpp, LDH_D, UREAtpp
1806	-58.8829	EX_succ_e	7.97599	-7.5	0.157559	5	34.9228	-11.0799	-2.79929	27.7291	9.99301	b4117, b0010, b3927, b1380, b2701	ACt2rpp, ARGDC, GLYALDtpp, GLYtpp, LDH_D, UREAtpp
1807	-58.8829	EX_succ_e	7.97599	-7.5	0.157559	5	34.9228	-11.0799	-2.79929	27.7291	9.99301	b0010, b4115, b3927, b1380, b0783	ACt2rpp, ARGAGMt7pp, CPMPS, GLYALDtpp, GLYtpp, LDH_D, UREAtpp
1808	-58.8829	EX_succ_e	7.97599	-7.5	0.157559	5	34.9228	-11.0799	-2.79929	27.7291	9.99301	b4117, b0010, b3927, b1380, b2155	ACt2rpp, ARGDC, GLYALDtpp, GLYtpp, LDH_D, UREAtpp
1809	-58.8829	EX_succ_e	7.97599	-7.5	0.157559	5	34.9228	-11.0799	-2.79929	27.7291	9.99301	b0010, b4115, b3927, b1380, b3943	ACt2rpp, ARGAGMt7pp, CYSItpp, GLYALDtpp, GLYtpp, LDH_D, UREAtpp
1810	-58.8829	EX_succ_e	7.97599	-7.5	0.157559	5	34.9228	-11.0799	-2.79929	27.7291	9.99301	b2668, b0010, b4115, b3927, b1380	ACt2rpp, ARGAGMt7pp, GLYALDtpp, GLYtpp, LDH_D, UREAtpp
1811	-58.8829	EX_succ_e	7.97599	-7.5	0.157559	5	34.9228	-11.0799	-2.79929	27.7291	9.99301	b2361, b0010, b4115, b3927, b1380	ACt2rpp, ARGAGMt7pp, GLYALDtpp, GLYtpp, LDH_D, UREAtpp
1812	-58.8829	EX_succ_e	7.97599	-7.5	0.157559	5	34.9228	-11.0799	-2.79929	27.7291	9.99301	b4117, b0010, b3927, b1380, b2843	ACt2rpp, ARGDC, GLYALDtpp, GLYtpp, KDUI, LDH_D, UREAtpp
1813	-58.8829	EX_succ_e	7.97599	-7.5	0.157559	5	34.9228	-11.0799	-2.79929	27.7291	9.99301	b4117, b0010, b1764, b3927, b1380	ACt2rpp, ARGDC, GLYALDtpp, GLYtpp, LDH_D, SELNPS, UREAtpp
1814	-58.8829	EX_succ_e	7.97599	-7.5	0.157559	5	34.9228	-11.0799	-2.79929	27.7291	9.99301	b3397, b0010, b4115, b3927, b1380	ACt2rpp, ARGAGMt7pp, GLYALDtpp, GLYtpp, LDH_D, UREAtpp
1815	-58.8829	EX_succ_e	7.97599	-7.5	0.157559	5	34.9228	-11.0799	-2.79929	27.7291	9.99301	b0732, b4117, b0010, b3927, b1380	ACt2rpp, ARGDC, GLYALDtpp, GLYtpp, LDH_D, MANPGH, UREAtpp
1816	-58.8829	EX_succ_e	7.97599	-7.5	0.157559	5	34.9228	-11.0799	-2.79929	27.7291	9.99301	b4117, b0010, b0573, b3927, b1380	ACt2rpp, AGt3, ARGDC, CUt3, GLYALDtpp, GLYtpp, LDH_D, UREAtpp
1817	-58.8829	EX_succ_e	7.97599	-7.5	0.157559	5	34.9228	-11.0799	-2.79929	27.7291	9.99301	b0010, b4115, b4193, b3927, b1380	ACt2rpp, ARGAGMt7pp, ASCBptspp, GLYALDtpp, GLYtpp, LDH_D, UREAtpp
1818	-58.8829	EX_succ_e	7.97599	-7.5	0.157559	5	34.9228	-11.0799	-2.79929	27.7291	9.99301	b3670, b0010, b4115, b3927, b1380	ACt2rpp, ARGAGMt7pp, GLYALDtpp, GLYtpp, LDH_D, UREAtpp
1819	-58.8829	EX_succ_e	7.97599	-7.5	0.157559	5	34.9228	-11.0799	-2.79929	27.7291	9.99301	b3589, b0010, b4115, b3927, b1380	ACt2rpp, ARGAGMt7pp, GLYALDtpp, GLYtpp, LDH_D, UREAtpp
1820	-58.8829	EX_succ_e	7.97599	-7.5	0.157559	5	34.9228	-11.0799	-2.79929	27.7291	9.99301	b0010, b4115, b2481, b3927, b1380	ACt2rpp, ARGAGMt7pp, GLYALDtpp, GLYtpp, LDH_D, UREAtpp
1821	-58.8829	EX_succ_e	7.97599	-7.5	0.157559	5	34.9228	-11.0799	-2.79929	27.7291	9.99301	b4117, b0010, b3927, b1380, b4136	ACt2rpp, ARGDC, DSBDR, GLYALDtpp, GLYtpp, LDH_D, TDSR1, TDSR2, UREAtpp
1822	-58.8829	EX_succ_e	7.97599	-7.5	0.157559	5	34.9228	-11.0799	-2.79929	27.7291	9.99301	b4117, b0010, b3374, b3927, b1380	ACt2rpp, ARGDC, FRULYSK, GLYALDtpp, GLYtpp, LDH_D, UREAtpp
1823	-58.8829	EX_succ_e	7.97599	-7.5	0.157559	5	34.9228	-11.0799	-2.79929	27.7291	9.99301	b4117, b0010, b3927, b1380, b1485	ACt2rpp, ARGDC, GLYALDtpp, GLYtpp, LDH_D, UREAtpp
1824	-58.8829	EX_succ_e	7.97599	-7.5	0.157559	5	34.9228	-11.0799	-2.79929	27.7291	9.99301	b4117, b2342, b0010, b3927, b1380	ACt2rpp, ARGDC, GLYALDtpp, GLYtpp, LDH_D, UREAtpp
1825	-58.8829	EX_succ_e	7.97599	-7.5	0.157559	5	34.9228	-11.0799	-2.79929	27.7291	9.99301	b0010, b4115, b3374, b3927, b1380	ACt2rpp, ARGAGMt7pp, FRULYSK, GLYALDtpp, GLYtpp, LDH_D, UREAtpp
1826	-58.8829	EX_succ_e	7.97599	-7.5	0.157559	5	34.9228	-11.0799	-2.79929	27.7291	9.99301	b0010, b4115, b0341, b3927, b1380	ACt2rpp, ARGAGMt7pp, CYNTt2pp, GLYALDtpp, GLYtpp, LDH_D, UREAtpp
1827	-58.8829	EX_succ_e	7.97599	-7.5	0.157559	5	34.9228	-11.0799	-2.79929	27.7291	9.99301	b4117, b0010, b3458, b3927, b1380	ACt2rpp, ARGDC, GLYALDtpp, GLYtpp, LDH_D, UREAtpp
1828	-58.8829	EX_succ_e	7.97599	-7.5	0.157559	5	34.9228	-11.0799	-2.79929	27.7291	9.99301	b1478, b0010, b4115, b3927, b1380	ACt2rpp, ARGAGMt7pp, GLYALDtpp, GLYtpp, LDH_D, UREAtpp
1829	-58.8829	EX_succ_e	7.97599	-7.5	0.157559	5	34.9228	-11.0799	-2.79929	27.7291	9.99301	b0010, b4115, b4019, b3927, b1380	ACt2rpp, ARGAGMt7pp, GLYALDtpp, GLYtpp, LDH_D, UREAtpp
1830	-58.8829	EX_succ_e	7.97599	-7.5	0.157559	5	34.9228	-11.0799	-2.79929	27.7291	9.99301	b0010, b4115, b3927, b1380, b0693	ACt2rpp, ARGAGMt7pp, GLYALDtpp, GLYtpp, LDH_D, UREAtpp
1831	-58.8829	EX_succ_e	7.97599	-7.5	0.157559	5	34.9228	-11.0799	-2.79929	27.7291	9.99301	b4117, b0010, b0933, b3927, b1380	ACt2rpp, ARGDC, ETHSO3abcpp, GLYALDtpp, GLYtpp, LDH_D, MSO3abcpp, SULFACabcpp, UREAtpp
1832	-58.8829	EX_succ_e	7.97599	-7.5	0.157559	5	34.9228	-11.0799	-2.79929	27.7291	9.99301	b0010, b4115, b1329, b3927, b1380	ACt2rpp, ARGAGMt7pp, GLYALDtpp, GLYtpp, LDH_D, UREAtpp
1833	-58.8829	EX_succ_e	7.97599	-7.5	0.157559	5	34.9228	-11.0799	-2.79929	27.7291	9.99301	b4117, b0010, b4031, b3927, b1380	ACt2rpp, ARGDC, GLYALDtpp, GLYtpp, LDH_D, UREAtpp, XYLt2pp
1834	-58.8829	EX_succ_e	7.97599	-7.5	0.157559	5	34.9228	-11.0799	-2.79929	27.7291	9.99301	b4117, b0010, b3336, b3927, b1380	ACt2rpp, ARGDC, GLYALDtpp, GLYtpp, LDH_D, UREAtpp
1835	-58.8829	EX_succ_e	7.97599	-7.5	0.157559	5	34.9228	-11.0799	-2.79929	27.7291	9.99301	b3789, b4117, b0010, b3927, b1380	ACt2rpp, ARGDC, GLYALDtpp, GLYtpp, LDH_D, UREAtpp
1836	-58.8829	EX_succ_e	7.97599	-7.5	0.157559	5	34.9228	-11.0799	-2.79929	27.7291	9.99301	b4117, b0010, b0764, b3927, b1380	ACt2rpp, ARGDC, GLYALDtpp, GLYtpp, LDH_D, TUNGSabcpp, UREAtpp
1837	-58.8829	EX_succ_e	7.97599	-7.5	0.157559	5	34.9228	-11.0799	-2.79929	27.7291	9.99301	b4117, b0010, b3927, b1380, b3496	ACt2rpp, ARGDC, GLYALDtpp, GLYtpp, LDH_D, UREAtpp
1838	-58.8829	EX_succ_e	7.97599	-7.5	0.157559	5	34.9228	-11.0799	-2.79929	27.7291	9.99301	b4117, b0010, b3927, b1380, b0805	ACt2rpp, ARGDC, GLYALDtpp, GLYtpp, LDH_D, UREAtpp
1839	-58.8829	EX_succ_e	7.97599	-7.5	0.157559	5	34.9228	-11.0799	-2.79929	27.7291	9.99301	b4117, b0010, b0854, b3927, b1380	ACt2rpp, ARGDC, GLYALDtpp, GLYtpp, LDH_D, UREAtpp
1840	-58.8829	EX_succ_e	7.97599	-7.5	0.157559	5	34.9228	-11.0799	-2.79929	27.7291	9.99301	b4117, b0010, b3610, b3927, b1380	ACt2rpp, ARGDC, GLYALDtpp, GLYtpp, LDH_D, UREAtpp
1841	-58.8829	EX_succ_e	7.97599	-7.5	0.157559	5	34.9228	-11.0799	-2.79929	27.7291	9.99301	b4117, b0010, b0765, b3927, b1380	ACt2rpp, ARGDC, GLYALDtpp, GLYtpp, LDH_D, TUNGSabcpp, UREAtpp
1842	-58.8829	EX_succ_e	7.97599	-7.5	0.157559	5	34.9228	-11.0799	-2.79929	27.7291	9.99301	b3359, b0010, b4115, b3927, b1380	ACt2rpp, ARGAGMt7pp, GLYALDtpp, GLYtpp, LDH_D, UREAtpp
1843	-58.8829	EX_succ_e	7.97599	-7.5	0.157559	5	34.9228	-11.0799	-2.79929	27.7291	9.99301	b4117, b0335, b0010, b3927, b1380	ACt2rpp, ARGDC, GLYALDtpp, GLYtpp, LDH_D, UREAtpp
1844	-58.8829	EX_succ_e	7.97599	-7.5	0.157559	5	34.9228	-11.0799	-2.79929	27.7291	9.99301	b0010, b4115, b3927, b1380, b2302	ACt2rpp, ARGAGMt7pp, GLYALDtpp, GLYtpp, LDH_D, UREAtpp
1845	-58.8829	EX_succ_e	7.97599	-7.5	0.157559	5	34.9228	-11.0799	-2.79929	27.7291	9.99301	b0010, b1291, b4115, b3927, b1380	ACt2rpp, ARGAGMt7pp, GLYALDtpp, GLYtpp, LDH_D, UREAtpp
1846	-58.8829	EX_succ_e	7.97599	-7.5	0.157559	5	34.9228	-11.0799	-2.79929	27.7291	9.99301	b3399, b0010, b4115, b3927, b1380	ACt2rpp, ARGAGMt7pp, GLYALDtpp, GLYtpp, LDH_D, UREAtpp
1847	-58.8829	EX_succ_e	7.97599	-7.5	0.157559	5	34.9228	-11.0799	-2.79929	27.7291	9.99301	b4117, b0010, b2177, b3927, b1380	ACt2rpp, ARGDC, GLYALDtpp, GLYtpp, LDH_D, UREAtpp
1848	-58.8829	EX_succ_e	7.97599	-7.5	0.157559	5	34.9228	-11.0799	-2.79929	27.7291	9.99301	b4117, b0010, b1442, b3927, b1380	ACt2rpp, ARGDC, GLYALDtpp, GLYtpp, LDH_D, UREAtpp
1849	-58.8829	EX_succ_e	7.97599	-7.5	0.157559	5	34.9228	-11.0799	-2.79929	27.7291	9.99301	b4117, b0010, b3927, b1380, b0211	ACt2rpp, ARGDC, GLYALDtpp, GLYtpp, LDH_D, UREAtpp
1850	-58.8829	EX_succ_e	7.97599	-7.5	0.157559	5	34.9228	-11.0799	-2.79929	27.7291	9.99301	b0010, b4115, b3664, b3927, b1380	ACt2rpp, ARGAGMt7pp, GLYALDtpp, GLYtpp, LDH_D, UREAtpp
1851	-58.8829	EX_succ_e	7.97599	-7.5	0.157559	5	34.9228	-11.0799	-2.79929	27.7291	9.99301	b1907, b0010, b4115, b3927, b1380	ACt2rpp, ARGAGMt7pp, GLYALDtpp, GLYtpp, LDH_D, UREAtpp
1852	-58.8829	EX_succ_e	7.97599	-7.5	0.157559	5	34.9228	-11.0799	-2.79929	27.7291	9.99301	b0010, b4115, b3927, b1380, b0789	ACt2rpp, ARGAGMt7pp, GLYALDtpp, GLYtpp, LDH_D, UREAtpp
1853	-58.8829	EX_succ_e	7.97599	-7.5	0.157559	5	34.9228	-11.0799	-2.79929	27.7291	9.99301	b0010, b2423, b4115, b3927, b1380	ACt2rpp, ARGAGMt7pp, GLYALDtpp, GLYtpp, LDH_D, SELabcpp, SLNTabcpp, TSULabcpp, UREAtpp
1854	-58.8829	EX_succ_e	7.97599	-7.5	0.157559	5	34.9228	-11.0799	-2.79929	27.7291	9.99301	b2930, b0010, b4115, b3927, b1380	ACt2rpp, ARGAGMt7pp, GLYALDtpp, GLYtpp, LDH_D, UREAtpp
1855	-58.8829	EX_succ_e	7.97599	-7.5	0.157559	5	34.9228	-11.0799	-2.79929	27.7291	9.99301	b4117, b0010, b3927, b1380, b2037	ACt2rpp, ARGDC, GLYALDtpp, GLYtpp, LDH_D, O16AUNDtpp, UREAtpp
1856	-58.8829	EX_succ_e	7.97599	-7.5	0.157559	5	34.9228	-11.0799	-2.79929	27.7291	9.99301	b2937, b0010, b4115, b3927, b1380	ACt2rpp, AGMT, ARGAGMt7pp, GLYALDtpp, GLYtpp, LDH_D, UREAtpp
1857	-58.8829	EX_succ_e	7.97599	-7.5	0.157559	5	34.9228	-11.0799	-2.79929	27.7291	9.99301	b2039, b4117, b0010, b3927, b1380	ACt2rpp, ARGDC, GLYALDtpp, GLYtpp, LDH_D, UREAtpp
1858	-58.8829	EX_succ_e	7.97599	-7.5	0.157559	5	34.9228	-11.0799	-2.79929	27.7291	9.99301	b0010, b4115, b3927, b1380, b4474	ACt2rpp, ARGAGMt7pp, FRULYSE, GLYALDtpp, GLYtpp, LDH_D, UREAtpp
1859	-58.8829	EX_succ_e	7.97599	-7.5	0.157559	5	34.9228	-11.0799	-2.79929	27.7291	9.99301	b4117, b2538, b0010, b3927, b1380	ACt2rpp, ARGDC, CINNDO, GLYALDtpp, GLYtpp, LDH_D, PPPNDO, UREAtpp
1860	-58.8829	EX_succ_e	7.97599	-7.5	0.157559	5	34.9228	-11.0799	-2.79929	27.7291	9.99301	b4117, b0010, b3580, b3927, b1380	3KGK, ACt2rpp, ARGDC, GLYALDtpp, GLYtpp, LDH_D, UREAtpp
1861	-58.8829	EX_succ_e	7.97599	-7.5	0.157559	5	34.9228	-11.0799	-2.79929	27.7291	9.99301	b1302, b0010, b4115, b3927, b1380	ACt2rpp, ARGAGMt7pp, GLYALDtpp, GLYtpp, LDH_D, UREAtpp
1862	-58.8829	EX_succ_e	7.97599	-7.5	0.157559	5	34.9228	-11.0799	-2.79929	27.7291	9.99301	b4117, b0010, b3927, b1380, b0875	ACt2rpp, ARGDC, GLYALDtpp, GLYtpp, LDH_D, UREAtpp
1863	-58.8829	EX_succ_e	7.97599	-7.5	0.157559	5	34.9228	-11.0799	-2.79929	27.7291	9.99301	b4117, b0010, b3927, b1380, b2794	ACt2rpp, ARGDC, CDGR, GLYALDtpp, GLYtpp, LDH_D, UREAtpp
1864	-58.8829	EX_succ_e	7.97599	-7.5	0.157559	5	34.9228	-11.0799	-2.79929	27.7291	9.99301	b0010, b4115, b3927, b1380, b3208	ACt2rpp, ARGAGMt7pp, GLYALDtpp, GLYtpp, LDH_D, UREAtpp
1865	-58.8829	EX_succ_e	7.97599	-7.5	0.157559	5	34.9228	-11.0799	-2.79929	27.7291	9.99301	b0010, b4115, b2165, b3927, b1380	ACt2rpp, ARGAGMt7pp, GLYALDtpp, GLYtpp, LDH_D, UREAtpp, YUMPS
1866	-58.8829	EX_succ_e	7.97599	-7.5	0.157559	5	34.9228	-11.0799	-2.79929	27.7291	9.99301	b4198, b0010, b4115, b3927, b1380	ACt2rpp, ARGAGMt7pp, GLYALDtpp, GLYtpp, LDH_D, UREAtpp
1867	-58.8829	EX_succ_e	7.97599	-7.5	0.157559	5	34.9228	-11.0799	-2.79929	27.7291	9.99301	b4117, b0010, b2485, b3927, b1380	ACt2rpp, ARGDC, GLYALDtpp, GLYtpp, LDH_D, UREAtpp
1868	-58.8829	EX_succ_e	7.97599	-7.5	0.157559	5	34.9228	-11.0799	-2.79929	27.7291	9.99301	b4117, b3397, b0010, b3927, b1380	ACt2rpp, ARGDC, GLYALDtpp, GLYtpp, LDH_D, UREAtpp
1869	-58.8829	EX_succ_e	7.97599	-7.5	0.157559	5	34.9228	-11.0799	-2.79929	27.7291	9.99301	b1109, b0010, b4115, b3927, b1380	ACt2rpp, ARGAGMt7pp, GLYALDtpp, GLYtpp, LDH_D, UREAtpp
1870	-58.8829	EX_succ_e	7.97599	-7.5	0.157559	5	34.9228	-11.0799	-2.79929	27.7291	9.99301	b4117, b0010, b4464, b3927, b1380	ACt2rpp, ARGDC, GLYALDtpp, GLYtpp, LDH_D, UREAtpp
1871	-58.8829	EX_succ_e	7.97599	-7.5	0.157559	5	34.9228	-11.0799	-2.79929	27.7291	9.99301	b4117, b0010, b4193, b3927, b1380	ACt2rpp, ARGDC, ASCBptspp, GLYALDtpp, GLYtpp, LDH_D, UREAtpp
[truncated: 3,129 more rows]

## Sheet: Removed reaction duplicates
Rank	Fitness Score	Product	Product flux (mmol/gDW/h	Substrate flux (mmol/gDW/h2	Maximal growth rate (1/h)	Nr of deletions	Minimal ISS at max growth (1e-4 USD/gDW/h)	Minimal ISS at 0 growth (1e-4 USD/gDW/h)	Environmental SI at max growth (1e-4 USD/gDW/h)	Economic SI at max growth (1e-4 USD/gDW/h)	Social SI at max growth (1e-4 USD/gDW/h)	Gene deletions	Deleted reactions
[truncated: 3,072 more rows]
