# Supplementary material
Source: MDPI journal article supplement (https://www.mdpi.com/2311-5637/9/6/531)
Supplement: s1 [file s1 › S_Table4_design_7600-8000.xlsx]

## Sheet: Design 7600-8000
Rank	Fitness Score	Product	Product flux (mmol/gDW/h	Substrate flux (mmol/gDW/h2	Maximal growth rate (1/h)	Nr of deletions	Minimal ISS at max growth (1e-4 USD/gDW/h)	Minimal ISS at 0 growth (1e-4 USD/gDW/h)	Environmental SI at max growth (1e-4 USD/gDW/h)	Economic SI at max growth (1e-4 USD/gDW/h)	Social SI at max growth (1e-4 USD/gDW/h)	Gene deletions	Deleted reactions
7600	-57.8484	EX_succ_e	7.96585	-7.5	0.164791	7	33.8952	-10.6936	-2.84279	26.9332	9.80486	b1264, b3844, b2049, b0010, b0653, b1533, b1380	ACt2rpp, ANS, ASPabcpp, FADRx, FE3Ri, FLVRx, GLUabcpp, LDH_D, MAN1PT2, SERtpp
7601	-57.8484	EX_succ_e	7.96585	-7.5	0.164791	7	33.8952	-10.6936	-2.84279	26.9332	9.80486	b0077, b3844, b0010, b4115, b4120, b1380, b4233	ACt2rpp, ARGAGMt7pp, FADRx, FE3Ri, FLVRx, LDH_D, UM3PL, UM4PL
7602	-57.8484	EX_succ_e	7.96585	-7.5	0.164791	7	33.8952	-10.6936	-2.84279	26.9332	9.80486	b3844, b0010, b4115, b4120, b1380, b4233, b1794	ACt2rpp, ARGAGMt7pp, FADRx, FE3Ri, FLVRx, LDH_D, UM3PL, UM4PL
7603	-57.8484	EX_succ_e	7.96585	-7.5	0.164791	7	33.8952	-10.6936	-2.84279	26.9332	9.80486	b3844, b2210, b0010, b4115, b2679, b1380, b3930	ACt2rpp, ARGAGMt7pp, CRNDabcpp, CRNabcpp, CTBTabcpp, DHNAOT4, FADRx, FE3Ri, FLVRx, LDH_D, MDH2, MDH3, PROabcpp
7604	-57.8484	EX_succ_e	7.96585	-7.5	0.164791	7	33.8952	-10.6936	-2.84279	26.9332	9.80486	b3844, b0010, b4115, b0979, b3502, b1380, b2906	ACt2rpp, ARGAGMt7pp, ASO3t8pp, CYTBD2pp, FADRx, FE3Ri, FLVRx, LDH_D, OPHHXy
7605	-57.8484	EX_succ_e	7.96585	-7.5	0.164791	7	33.8952	-10.6936	-2.84279	26.9332	9.80486	b3844, b2210, b0010, b3603, b2303, b1380, b3930	ACt2rpp, DHNAOT4, DHPTPE, FADRx, FE3Ri, FLVRx, LDH_D, MDH2, MDH3
7606	-57.8484	EX_succ_e	7.96585	-7.5	0.164791	7	33.8952	-10.6936	-2.84279	26.9332	9.80486	b3844, b0121, b0010, b4115, b2148, b1380, b1686	ACt2rpp, APCS, ARGAGMt7pp, DHNCOAT, FADRx, FE3Ri, FLVRx, GLCabcpp, LDH_D, SPMS
7607	-57.8484	EX_succ_e	7.96585	-7.5	0.164791	7	33.8952	-10.6936	-2.84279	26.9332	9.80486	b3844, b2210, b0010, b1380, b1798, b4101, b1400	2HPTCOAT, ACt2rpp, ARMEPNS, FADRx, FE3Ri, FLVRx, LDH_D, MDH2, MDH3
7608	-57.8484	EX_succ_e	7.96585	-7.5	0.164791	7	33.8952	-10.6936	-2.84279	26.9332	9.80486	b2930, b3844, b0010, b4115, b4464, b2131, b1380	ACt2rpp, ARGAGMt7pp, CHLabcpp, FADRx, FE3Ri, FLVRx, LDH_D
7609	-57.8484	EX_succ_e	7.96585	-7.5	0.164791	7	33.8952	-10.6936	-2.84279	26.9332	9.80486	b3844, b2048, b0010, b1380, b3542, b0543, b1378	ACt2rpp, CGLYabcpp, CHLt3pp, FADRx, FE3Ri, FLVRx, GLYBt3pp, LDH_D, PMANM, POR5, PROGLYabcpp
7610	-57.8484	EX_succ_e	7.96585	-7.5	0.164791	7	33.8952	-10.6936	-2.84279	26.9332	9.80486	b3844, b3526, b3565, b0010, b4115, b0459, b1380	ACt2rpp, ARGAGMt7pp, DDGLK, FADRx, FE3Ri, FLVRx, GLCATr, LDH_D, MALTATr, XYLI1, XYLI2
7611	-57.8484	EX_succ_e	7.96585	-7.5	0.164791	7	33.8952	-10.6936	-2.84279	26.9332	9.80486	b3844, b2690, b0010, b4115, b1246, b1380, b3543	ACt2rpp, ALKP, ARGAGMt7pp, CGLYabcpp, FADRx, FE3Ri, FLVRx, LDH_D, PROGLYabcpp
7612	-57.8484	EX_succ_e	7.96585	-7.5	0.164791	7	33.8952	-10.6936	-2.84279	26.9332	9.80486	b3844, b0010, b4115, b1064, b3006, b2919, b1380	ACt2rpp, ADOCBLtonex, ARGAGMt7pp, ASR, CBItonex, CBL1tonex, CPGNtonex, FADRx, FE3DCITtonex, FE3DHBZStonex, FE3HOXtonex, FE3Ri, FECRMtonex, FEENTERtonex, FEOXAMtonex, FLVRx, LDH_D, MMCD
7613	-57.8484	EX_succ_e	7.96585	-7.5	0.164791	7	33.8952	-10.6936	-2.84279	26.9332	9.80486	b3426, b3844, b0010, b4115, b3409, b1380, b2480	ACt2rpp, ARGAGMt7pp, FADRx, FE2abcpp, FE3Ri, FLVRx, LDH_D
7614	-57.8484	EX_succ_e	7.96585	-7.5	0.164791	7	33.8952	-10.6936	-2.84279	26.9332	9.80486	b3693, b3844, b0010, b4115, b0755, b1380, b3208	ACt2rpp, ARGAGMt7pp, DDGALK, FADRx, FE3Ri, FLVRx, LDH_D
7615	-57.8484	EX_succ_e	7.96585	-7.5	0.164791	7	33.8952	-10.6936	-2.84279	26.9332	9.80486	b3844, b1656, b0010, b4115, b4090, b1380, b3496	ACt2rpp, ALLPI, ARGAGMt7pp, FADRx, FE3Ri, FLVRx, LDH_D
7616	-57.8484	EX_succ_e	7.96585	-7.5	0.164791	7	33.8952	-10.6936	-2.84279	26.9332	9.80486	b1849, b3844, b0312, b0996, b0010, b1380, b4386	ACt2rpp, BETALDHx, BETALDHy, FADRx, FE3Ri, FLVRx, GART, LDH_D, LIPAMPL, LIPATPT, OCTNLL
7617	-57.8484	EX_succ_e	7.96585	-7.5	0.164791	7	33.8952	-10.6936	-2.84279	26.9332	9.80486	b3844, b1200, b0010, b2866, b1991, b1380, b1011	ACt2rpp, DHAPT, FADRx, FE3Ri, FLVRx, HXAND, LDH_D, NNDMBRT, URACPAH, XAND
7618	-57.8484	EX_succ_e	7.96585	-7.5	0.164791	7	33.8952	-10.6936	-2.84279	26.9332	9.80486	b3500, b3844, b2049, b0010, b4115, b2488, b1380	ACt2rpp, ARGAGMt7pp, FADRx, FE3Ri, FLVRx, GTHOr, LDH_D, MAN1PT2
7619	-57.8474	EX_succ_e	7.96585	-7.5	0.164791	5	33.8952	-11.0958	-2.84279	26.9332	9.80486	b1702, b2026, b3583, b0010, b1380	ACt2rpp, LDH_D, PPS, PRAMPC, PRATPP
7620	-57.8474	EX_succ_e	7.96585	-7.5	0.164791	5	33.8952	-11.0958	-2.84279	26.9332	9.80486	b4322, b0010, b0973, b1606, b1380	ACt2rpp, DHMPTR, LDH_D, MNNH
7621	-57.8474	EX_succ_e	7.96585	-7.5	0.164791	5	33.8952	-11.0958	-2.84279	26.9332	9.80486	b1849, b0312, b0996, b0010, b1380	ACt2rpp, BETALDHx, BETALDHy, GART, LDH_D
7622	-57.8474	EX_succ_e	7.96585	-7.5	0.164791	5	33.8952	-11.0958	-2.84279	26.9332	9.80486	b0902, b0010, b4115, b2947, b1380	ACt2rpp, ARGAGMt7pp, GTHS, LDH_D, OBTFL
7623	-57.8474	EX_succ_e	7.96585	-7.5	0.164791	5	33.8952	-11.0958	-2.84279	26.9332	9.80486	b2518, b1748, b0010, b2702, b1380	ACt2rpp, LDH_D, SBTptspp, SOTA
7624	-57.8474	EX_succ_e	7.96585	-7.5	0.164791	5	33.8952	-11.0958	-2.84279	26.9332	9.80486	b0010, b3450, b1380, b3881, b0462	6D6SPA, ACt2rpp, G3PCabcpp, G3PEabcpp, G3PGabcpp, G3PIabcpp, G3PSabcpp, GLYC2Pabcpp, GLYC3Pabcpp, LDH_D
7625	-57.8474	EX_succ_e	7.96585	-7.5	0.164791	5	33.8952	-11.0958	-2.84279	26.9332	9.80486	b0010, b2719, b3451, b2927, b1380	ACt2rpp, G3PCabcpp, G3PEabcpp, G3PGabcpp, G3PIabcpp, G3PSabcpp, GLYC2Pabcpp, GLYC3Pabcpp, LDH_D
7626	-57.8474	EX_succ_e	7.96585	-7.5	0.164791	5	33.8952	-11.0958	-2.84279	26.9332	9.80486	b2901, b3416, b0010, b3127, b1380	ACt2rpp, AMALT1, AMALT2, AMALT3, AMALT4, LDH_D
7627	-57.8474	EX_succ_e	7.96585	-7.5	0.164791	5	33.8952	-11.0958	-2.84279	26.9332	9.80486	b0010, b0592, b3599, b3625, b1380	ACt2rpp, DHBSZ3FEabcpp, FEENTERabcpp, HEPK2, LDH_D
7628	-57.8474	EX_succ_e	7.96585	-7.5	0.164791	5	33.8952	-11.0958	-2.84279	26.9332	9.80486	b0010, b0621, b1380, b2497, b0832	ACt2rpp, GTHRDabcpp, LDH_D
7629	-57.8474	EX_succ_e	7.96585	-7.5	0.164791	5	33.8952	-11.0958	-2.84279	26.9332	9.80486	b0010, b3456, b1380, b0355, b2842	ACt2rpp, ALAabcpp, ILEabcpp, LDH_D, LEUabcpp, THRabcpp, VALabcpp
7630	-57.8474	EX_succ_e	7.96585	-7.5	0.164791	5	33.8952	-11.0958	-2.84279	26.9332	9.80486	b4322, b0010, b4115, b1606, b1380	ACt2rpp, ARGAGMt7pp, DHMPTR, LDH_D, MNNH
7631	-57.8474	EX_succ_e	7.96585	-7.5	0.164791	5	33.8952	-11.0958	-2.84279	26.9332	9.80486	b0010, b4115, b1064, b3006, b1380	ACt2rpp, ADOCBLtonex, ARGAGMt7pp, ASR, CBItonex, CBL1tonex, CPGNtonex, FE3DCITtonex, FE3DHBZStonex, FE3HOXtonex, FECRMtonex, FEENTERtonex, FEOXAMtonex, LDH_D
7632	-57.8474	EX_succ_e	7.96585	-7.5	0.164791	5	33.8952	-11.0958	-2.84279	26.9332	9.80486	b2502, b0675, b0010, b1606, b1380	ACt2rpp, DHMPTR, LDH_D
7633	-57.8474	EX_succ_e	7.96585	-7.5	0.164791	5	33.8952	-11.0958	-2.84279	26.9332	9.80486	b1805, b0010, b0849, b2996, b1380	ACt2rpp, LDH_D
7634	-57.8474	EX_succ_e	7.96585	-7.5	0.164791	5	33.8952	-11.0958	-2.84279	26.9332	9.80486	b2582, b0010, b0622, b1380, b3857	ACt2rpp, BMOGDS1, BMOGDS2, BWCOGDS1, BWCOGDS2, LDH_D, LIPAHT2ex, LIPAHTex, MOGDS
7635	-57.8474	EX_succ_e	7.96585	-7.5	0.164791	5	33.8952	-11.0958	-2.84279	26.9332	9.80486	b0010, b3849, b4544, b1380, b2166	ACt2rpp, LDH_D, PSURIK, ULA4Ntppi
7636	-57.8474	EX_succ_e	7.96585	-7.5	0.164791	5	33.8952	-11.0958	-2.84279	26.9332	9.80486	b3744, b0010, b1781, b1380, b4392	ACt2rpp, LDH_D
7637	-57.8474	EX_succ_e	7.96585	-7.5	0.164791	5	33.8952	-11.0958	-2.84279	26.9332	9.80486	b3885, b0010, b2927, b1380, b3240	4HBZt3pp, ACt2rpp, LDH_D
7638	-57.8474	EX_succ_e	7.96585	-7.5	0.164791	5	33.8952	-11.0958	-2.84279	26.9332	9.80486	b0010, b4367, b1380, b2175, b2503	4PCPpp, ACt2rpp, AGM4PCPpp, FEOXAMR1, FEOXAMR2, FEOXAMR3, LDH_D
7639	-57.8474	EX_succ_e	7.96585	-7.5	0.164791	5	33.8952	-11.0958	-2.84279	26.9332	9.80486	b0010, b4291, b1380, b0594, b1430	ACt2rpp, DHBS, FE3DCITtonex, LDH_D, TEO2M
7640	-57.8474	EX_succ_e	7.96585	-7.5	0.164791	5	33.8952	-11.0958	-2.84279	26.9332	9.80486	b2388, b0010, b2035, b1380, b3656	ACt2rpp, HEX1, LDH_D, O16AP1pp, O16AP2pp, O16AP3pp, XYHDL
7641	-57.8474	EX_succ_e	7.96585	-7.5	0.164791	5	33.8952	-11.0958	-2.84279	26.9332	9.80486	b0010, b4115, b1124, b1380, b1601	ACt2rpp, AI2tpp, ARGAGMt7pp, LDH_D
7642	-57.8474	EX_succ_e	7.96585	-7.5	0.164791	5	33.8952	-11.0958	-2.84279	26.9332	9.80486	b2053, b0010, b4115, b1380, b0827	ACt2rpp, ARGAGMt7pp, BMOCOS, BWCOS, GMAND, LDH_D, MOCOS, WCOS
7643	-57.8474	EX_succ_e	7.96585	-7.5	0.164791	5	33.8952	-11.0958	-2.84279	26.9332	9.80486	b1636, b0010, b4115, b2490, b1380	ACt2rpp, ARGAGMt7pp, LDH_D
7644	-57.8474	EX_succ_e	7.96585	-7.5	0.164791	5	33.8952	-11.0958	-2.84279	26.9332	9.80486	b1466, b0010, b4115, b1380, b1856	ACt2rpp, ARGAGMt7pp, LDH_D
7645	-57.8474	EX_succ_e	7.96585	-7.5	0.164791	5	33.8952	-11.0958	-2.84279	26.9332	9.80486	b0010, b4115, b1440, b1380, b2093	ACt2rpp, ARGAGMt7pp, GALTptspp, LDH_D
7646	-57.8474	EX_succ_e	7.96585	-7.5	0.164791	5	33.8952	-11.0958	-2.84279	26.9332	9.80486	b2041, b3671, b0010, b4115, b1380	ACt2rpp, ARGAGMt7pp, LDH_D
7647	-57.8474	EX_succ_e	7.96585	-7.5	0.164791	5	33.8952	-11.0958	-2.84279	26.9332	9.80486	b0010, b4115, b1440, b1380, b2245	ACt2rpp, ARGAGMt7pp, LDH_D, LKDRA
7648	-57.8474	EX_succ_e	7.96585	-7.5	0.164791	5	33.8952	-11.0958	-2.84279	26.9332	9.80486	b2930, b1377, b0010, b4115, b1380	ACt2rpp, ARGAGMt7pp, LDH_D
7649	-57.8474	EX_succ_e	7.96585	-7.5	0.164791	5	33.8952	-11.0958	-2.84279	26.9332	9.80486	b0010, b2425, b4115, b1380, b2682	ACt2rpp, ARGAGMt7pp, LDH_D
7650	-57.8474	EX_succ_e	7.96585	-7.5	0.164791	5	33.8952	-11.0958	-2.84279	26.9332	9.80486	b0010, b1101, b4115, b4033, b1380	14GLUCANabcpp, ACt2rpp, ARGAGMt7pp, LDH_D, MALTHXabcpp, MALTPTabcpp, MALTTRabcpp, MALTTTRabcpp, MALTabcpp
7651	-57.8474	EX_succ_e	7.96585	-7.5	0.164791	5	33.8952	-11.0958	-2.84279	26.9332	9.80486	b0010, b4115, b0573, b1440, b1380	ACt2rpp, AGt3, ARGAGMt7pp, CUt3, LDH_D
7652	-57.8474	EX_succ_e	7.96585	-7.5	0.164791	5	33.8952	-11.0958	-2.84279	26.9332	9.80486	b2036, b0010, b4291, b1380, b4233	ACt2rpp, FE3DCITtonex, LDH_D, UDPGALM, UM3PL, UM4PL
7653	-57.8474	EX_succ_e	7.96585	-7.5	0.164791	5	33.8952	-11.0958	-2.84279	26.9332	9.80486	b3600, b0010, b1901, b0854, b1380	ACt2rpp, ARBabcpp, LDH_D, M1PD
7654	-57.8474	EX_succ_e	7.96585	-7.5	0.164791	5	33.8952	-11.0958	-2.84279	26.9332	9.80486	b3600, b0010, b4115, b3821, b1380	ACt2rpp, ARGAGMt7pp, LDH_D, M1PD, PLIPA1A120pp, PLIPA1A140pp, PLIPA1A141pp, PLIPA1A160pp, PLIPA1A161pp, PLIPA1A180pp, PLIPA1A181pp, PLIPA1E120pp, PLIPA1E140pp, PLIPA1E141pp, PLIPA1E160pp, PLIPA1E161pp, PLIPA1E180pp, PLIPA1E181pp, PLIPA1G120pp, PLIPA1G140pp, PLIPA1G141pp, PLIPA1G160pp, PLIPA1G161pp, PLIPA1G180pp, PLIPA1G181pp, PLIPA2A120pp, PLIPA2A140pp, PLIPA2A141pp, PLIPA2A160pp, PLIPA2A161pp, P…
7655	-57.8474	EX_succ_e	7.96585	-7.5	0.164791	5	33.8952	-11.0958	-2.84279	26.9332	9.80486	b3430, b0038, b0010, b1216, b1380	ACt2rpp, CA2t3pp, CRNBTCT, CRNCBCT, GLGC, LDH_D
7656	-57.8474	EX_succ_e	7.96585	-7.5	0.164791	5	33.8952	-11.0958	-2.84279	26.9332	9.80486	b1261, b0010, b1246, b1380, b1681	ACt2rpp, LDH_D, S2FE2SR, S2FE2SS, S2FE2SS2, S2FE2ST, S4FE4SR, S4FE4ST, TRPS1, TRPS2, TRPS3
7657	-57.8474	EX_succ_e	7.96585	-7.5	0.164791	5	33.8952	-11.0958	-2.84279	26.9332	9.80486	b2290, b0010, b4287, b1380, b0709	ACt2rpp, FE3DCITabcpp, LDH_D
7658	-57.8474	EX_succ_e	7.96585	-7.5	0.164791	5	33.8952	-11.0958	-2.84279	26.9332	9.80486	b0010, b2239, b0451, b1380, b3893	ACt2rpp, GPDDA1pp, GPDDA2pp, GPDDA3pp, GPDDA4pp, GPDDA5pp, LDH_D
7659	-57.8474	EX_succ_e	7.96585	-7.5	0.164791	5	33.8952	-11.0958	-2.84279	26.9332	9.80486	b4014, b0010, b1107, b1380, b2467	ACt2rpp, AGM3PH, AGM4PH, AGMH, GDPMNP, LDH_D
7660	-57.8474	EX_succ_e	7.96585	-7.5	0.164791	5	33.8952	-11.0958	-2.84279	26.9332	9.80486	b0010, b4067, b4094, b1380, b0432	ACt2rpp, ACt4pp, CYTBO3_4pp, GLYCLTt4pp, LDH_D, R15BPK
7661	-57.8474	EX_succ_e	7.96585	-7.5	0.164791	5	33.8952	-11.0958	-2.84279	26.9332	9.80486	b3500, b2243, b0010, b4115, b1380	ACt2rpp, ARGAGMt7pp, G3PD6, G3PD7, GTHOr, LDH_D
7662	-57.8474	EX_succ_e	7.96585	-7.5	0.164791	5	33.8952	-11.0958	-2.84279	26.9332	9.80486	b0010, b3610, b1380, b1090, b1686	ACPPAT120, ACPPAT140, ACPPAT141, ACPPAT160, ACPPAT161, ACPPAT180, ACPPAT181, ACt2rpp, DHNCOAT, LDH_D
7663	-57.8474	EX_succ_e	7.96585	-7.5	0.164791	5	33.8952	-11.0958	-2.84279	26.9332	9.80486	b2040, b0010, b4115, b1380, b1733	ACt2rpp, ARGAGMt7pp, DC6PDA, LDH_D, TDPDRR
7664	-57.8474	EX_succ_e	7.96585	-7.5	0.164791	5	33.8952	-11.0958	-2.84279	26.9332	9.80486	b0010, b4115, b0933, b3624, b1380	ACt2rpp, ARGAGMt7pp, ETHSO3abcpp, LDH_D, MOAT3C, MSO3abcpp, SULFACabcpp
7665	-57.8474	EX_succ_e	7.96585	-7.5	0.164791	5	33.8952	-11.0958	-2.84279	26.9332	9.80486	b3526, b0010, b0067, b0757, b1380	ACt2rpp, DDGLK, GALKr, LDH_D, THMabcpp
7666	-57.8474	EX_succ_e	7.96585	-7.5	0.164791	5	33.8952	-11.0958	-2.84279	26.9332	9.80486	b2243, b3575, b0010, b1380, b3878	ACt2rpp, DOGULNR, G3PD6, G3PD7, LDH_D, SQGH
7667	-57.8474	EX_succ_e	7.96585	-7.5	0.164791	5	33.8952	-11.0958	-2.84279	26.9332	9.80486	b2291, b2661, b0010, b1380, b4209	ACt2rpp, FESR, LDH_D
7668	-57.8474	EX_succ_e	7.96585	-7.5	0.164791	5	33.8952	-11.0958	-2.84279	26.9332	9.80486	b0010, b3480, b1380, b1473, b2683	ACt2rpp, LDH_D, PHEtipp, TRPtipp, TYRtipp
7669	-57.8474	EX_succ_e	7.96585	-7.5	0.164791	5	33.8952	-11.0958	-2.84279	26.9332	9.80486	b0010, b4115, b1380, b2660, b1990	ACt2rpp, ARGAGMt7pp, LDH_D, SHGO
7670	-57.8474	EX_succ_e	7.96585	-7.5	0.164791	5	33.8952	-11.0958	-2.84279	26.9332	9.80486	b1701, b0010, b4115, b1380, b4167	ACt2rpp, ARGAGMt7pp, LDH_D, NADHXD, NADHXE, NADPHXD, NADPHXE
7671	-57.8474	EX_succ_e	7.96585	-7.5	0.164791	5	33.8952	-11.0958	-2.84279	26.9332	9.80486	b3500, b3565, b0010, b1380, b0681	ACt2rpp, GTHOr, LDH_D, XYLI1, XYLI2
7672	-57.8474	EX_succ_e	7.96585	-7.5	0.164791	5	33.8952	-11.0958	-2.84279	26.9332	9.80486	b3500, b0010, b4115, b4094, b1380	ACt2rpp, ARGAGMt7pp, GTHOr, LDH_D, R15BPK
7673	-57.8473	EX_succ_e	7.96586	-7.5	0.164789	5	33.8952	-11.0958	-2.84279	26.9332	9.80483	b0003, b0010, b3610, b1380, b1090	4HTHRK, ACPPAT120, ACPPAT140, ACPPAT141, ACPPAT160, ACPPAT161, ACPPAT180, ACPPAT181, ACt2rpp, HSK, LDH_D
7674	-57.8465	EX_succ_e	7.9661	-7.5	0.164615	5	33.8937	-11.0943	-2.8428	26.9332	9.80332	b3708, b0010, b2320, b0307, b1380	ACt2rpp, LDH_D, PERD, TRPAS2
7675	-57.8448	EX_succ_e	7.96598	-7.5	0.164702	5	33.8927	-11.0958	-2.84297	26.9319	9.80373	b1656, b0010, b1918, b1380, b1341	ACt2rpp, CYSabcpp, LDH_D
7676	-57.8439	EX_succ_e	7.9664	-7.5	0.164399	5	33.8918	-11.0958	-2.84282	26.9332	9.80144	b0010, b1064, b0692, b1380, b3542	ACt2rpp, ASR, CGLYabcpp, LDH_D, PROGLYabcpp, PTRCORNt7pp
7677	-57.7489	EX_succ_e	7.96585	-7.5	0.164791	6	33.8952	-11.0928	-2.84279	26.9332	9.80486	b2029, b0010, b4115, b1380, b0723, b1193	ACt2rpp, ARGAGMt7pp, GND, LDH_D, SUCDi
7678	-57.7484	EX_succ_e	7.96585	-7.5	0.164791	8	33.8952	-10.6936	-2.84279	26.9332	9.80486	b3844, b0241, b0010, b0861, b4115, b1064, b2919, b1380	ACt2rpp, ARGAGMt7pp, ASR, FADRx, FE3Ri, FLVRx, LDH_D, MMCD
7679	-57.7484	EX_succ_e	7.96585	-7.5	0.164791	8	33.8952	-10.6936	-2.84279	26.9332	9.80486	b3903, b3844, b0010, b4115, b4120, b1380, b4233, b1794	ACt2rpp, ARGAGMt7pp, FADRx, FE3Ri, FLVRx, LDH_D, LYXI, RMI, UM3PL, UM4PL
7680	-57.7484	EX_succ_e	7.96585	-7.5	0.164791	8	33.8952	-10.6936	-2.84279	26.9332	9.80486	b3011, b3844, b0010, b4115, b0979, b3502, b1380, b2906	13PPDH2, ACt2rpp, ARGAGMt7pp, ASO3t8pp, CYTBD2pp, FADRx, FE3Ri, FLVRx, LDH_D, OPHHXy
7681	-57.7484	EX_succ_e	7.96585	-7.5	0.164791	8	33.8952	-10.6936	-2.84279	26.9332	9.80486	b3844, b3092, b2205, b0010, b4115, b2179, b1186, b1380	ACt2rpp, ARGAGMt7pp, FADRx, FE3Ri, FLVRx, GUI1, GUI2, LDH_D, NAt3_1p5pp, NO3R1bpp
7682	-57.7484	EX_succ_e	7.96585	-7.5	0.164791	8	33.8952	-10.6936	-2.84279	26.9332	9.80486	b3844, b2799, b0010, b4123, b0311, b4115, b0040, b1380	ACt2rpp, ARGAGMt7pp, CHOLD, CRNt7pp, CRNt8pp, FADRx, FE3Ri, FLVRx, LCARS, LDH_D, SUCTARTtpp, TARTt2_3pp
7683	-57.7484	EX_succ_e	7.96585	-7.5	0.164791	8	33.8952	-10.6936	-2.84279	26.9332	9.80486	b3844, b3709, b0010, b1380, b1798, b4101, b1400, b1090	2HPTCOAT, ACPPAT120, ACPPAT140, ACPPAT141, ACPPAT160, ACPPAT161, ACPPAT180, ACPPAT181, ACt2rpp, ARMEPNS, FADRx, FE3Ri, FLVRx, LDH_D
7684	-57.7484	EX_succ_e	7.96585	-7.5	0.164791	8	33.8952	-10.6936	-2.84279	26.9332	9.80486	b3844, b0505, b0010, b0388, b2578, b1380, b1486, b1338	4ABZGLUH, ACt2rpp, FADRx, FE3Ri, FLVRx, LDH_D, UGLYCH
7685	-57.7484	EX_succ_e	7.96585	-7.5	0.164791	8	33.8952	-10.6936	-2.84279	26.9332	9.80486	b1849, b3844, b0312, b0996, b0010, b2536, b1380, b4386	ACt2rpp, BETALDHx, BETALDHy, FADRx, FE3Ri, FLVRx, GART, LDH_D, LIPAMPL, LIPATPT, OCTNLL, PPPNt2rpp
7686	-57.7477	EX_succ_e	7.9661	-7.5	0.164617	8	33.8937	-10.6921	-2.8428	26.9332	9.80334	b3708, b2930, b3844, b1493, b0010, b4115, b0573, b1380	ACt2rpp, AGt3, ARGAGMt7pp, CUt3, FADRx, FE3Ri, FLVRx, LDH_D, TRPAS2
7687	-57.7474	EX_succ_e	7.96585	-7.5	0.164791	6	33.8952	-11.0958	-2.84279	26.9332	9.80486	b1521, b0010, b0765, b4115, b1761, b1380	ACt2rpp, ARGAGMt7pp, LDH_D, TAGURr, TUNGSabcpp
7688	-57.7474	EX_succ_e	7.96585	-7.5	0.164791	6	33.8952	-11.0958	-2.84279	26.9332	9.80486	b0485, b0010, b0066, b4055, b1727, b1380	ACt2rpp, GAPP, LDH_D, THMabcpp, TYRPpp
7689	-57.7474	EX_succ_e	7.96585	-7.5	0.164791	6	33.8952	-11.0958	-2.84279	26.9332	9.80486	b2210, b0010, b4115, b3603, b2303, b1380	ACt2rpp, ARGAGMt7pp, DHPTPE, LDH_D, MDH2, MDH3
7690	-57.7474	EX_succ_e	7.96585	-7.5	0.164791	6	33.8952	-11.0958	-2.84279	26.9332	9.80486	b3671, b0010, b4115, b1380, b1990, b1681	ACt2rpp, ARGAGMt7pp, LDH_D, S2FE2SR, S2FE2SS, S2FE2SS2, S2FE2ST, S4FE4SR, S4FE4ST
7691	-57.7474	EX_succ_e	7.96585	-7.5	0.164791	6	33.8952	-11.0958	-2.84279	26.9332	9.80486	b2521, b4477, b0674, b0010, b1858, b1380	ACt2rpp, ASNS1, DDPGALA, LDH_D, MCPST, ZNabcpp
7692	-57.7474	EX_succ_e	7.96585	-7.5	0.164791	6	33.8952	-11.0958	-2.84279	26.9332	9.80486	b0010, b4115, b2201, b1380, b4356, b1391	ACt2rpp, ARGAGMt7pp, GALCTNLt2pp, LDH_D, PACCOAE, PHEMEabcpp
7693	-57.7474	EX_succ_e	7.96585	-7.5	0.164791	6	33.8952	-11.0958	-2.84279	26.9332	9.80486	b2436, b0348, b0010, b4115, b2201, b1380	ACt2rpp, ARGAGMt7pp, CPPPGO, DHCINDO, HPPPNDO, LDH_D, PHEMEabcpp
7694	-57.7474	EX_succ_e	7.96585	-7.5	0.164791	6	33.8952	-11.0958	-2.84279	26.9332	9.80486	b0010, b0765, b4035, b1380, b1621, b3241	14GLUCANabcpp, 4HBZt3pp, ACt2rpp, LDH_D, MALTHXabcpp, MALTPTabcpp, MALTTRabcpp, MALTTTRabcpp, MALTabcpp, MALTptspp, TUNGSabcpp
7695	-57.7474	EX_succ_e	7.96585	-7.5	0.164791	6	33.8952	-11.0958	-2.84279	26.9332	9.80486	b0010, b0867, b2150, b1223, b1380, b1870	ACt2rpp, CXSAMS, GLCabcpp, LDH_D
7696	-57.7474	EX_succ_e	7.96585	-7.5	0.164791	6	33.8952	-11.0958	-2.84279	26.9332	9.80486	b0078, b0010, b1380, b2480, b1385, b1394	ACt2rpp, ALDD19xr, LDH_D, OXDHCOAT, REPHACCOAI
7697	-57.7474	EX_succ_e	7.96585	-7.5	0.164791	6	33.8952	-11.0958	-2.84279	26.9332	9.80486	b1613, b4197, b3845, b0010, b3502, b1380	ACt2rpp, ASO3t8pp, LDH_D, MAN6PI
7698	-57.7474	EX_succ_e	7.96585	-7.5	0.164791	6	33.8952	-11.0958	-2.84279	26.9332	9.80486	b1993, b0010, b0066, b4115, b1380, b4129	ACBIPGT, ACt2rpp, ADOCBIK, AP4AS, ARGAGMt7pp, LDH_D, THMabcpp
7699	-57.7474	EX_succ_e	7.96585	-7.5	0.164791	6	33.8952	-11.0958	-2.84279	26.9332	9.80486	b3940, b4388, b0010, b1250, b1380, b3447	ACt2rpp, GTHRDHpp, LDH_D, PSP_L
7700	-57.7474	EX_succ_e	7.96585	-7.5	0.164791	6	33.8952	-11.0958	-2.84279	26.9332	9.80486	b0010, b2587, b4115, b0933, b1380, b2247	ACt2rpp, AKGt2rpp, ARGAGMt7pp, ETHSO3abcpp, LDH_D, MSO3abcpp, RHMND, SULFACabcpp
7701	-57.7474	EX_succ_e	7.96585	-7.5	0.164791	6	33.8952	-11.0958	-2.84279	26.9332	9.80486	b2418, b4322, b0010, b4115, b1380, b0831	ACt2rpp, ARGAGMt7pp, GTHRDabcpp, LDH_D, MNNH, PYDAMK, PYDXNK
7702	-57.7474	EX_succ_e	7.96585	-7.5	0.164791	6	33.8952	-11.0958	-2.84279	26.9332	9.80486	b3526, b0010, b0932, b0067, b1919, b1380	ACt2rpp, CYSDDS, DDGLK, LDH_D, THMabcpp
7703	-57.7474	EX_succ_e	7.96585	-7.5	0.164791	6	33.8952	-11.0958	-2.84279	26.9332	9.80486	b2291, b2661, b0010, b1380, b3488, b4209	ACt2rpp, FESR, INOSTO, LDH_D
7704	-57.7473	EX_succ_e	7.96586	-7.5	0.164789	6	33.8952	-11.0958	-2.84279	26.9332	9.80483	b0003, b0010, b3610, b1380, b1090, b1686	4HTHRK, ACPPAT120, ACPPAT140, ACPPAT141, ACPPAT160, ACPPAT161, ACPPAT180, ACPPAT181, ACt2rpp, DHNCOAT, HSK, LDH_D
7705	-57.7437	EX_succ_e	7.96644	-7.5	0.16437	6	33.8916	-11.0958	-2.84283	26.9332	9.80119	b2251, b1701, b0010, b4115, b0809, b1380	ACt2rpp, ARGAGMt7pp, GLNabcpp, LDH_D
7706	-57.72	EX_succ_e	7.9426	-7.5	0.163438	5	33.7679	-11.0958	-2.83632	26.8381	9.76615	b0010, b3568, b4115, b0199, b1380	ACt2rpp, ARGAGMt7pp, LDH_D, METDabcpp, METabcpp, XYLabcpp
7707	-57.6489	EX_succ_e	7.96585	-7.5	0.164791	7	33.8952	-11.0928	-2.84279	26.9332	9.80486	b1260, b2029, b0010, b2169, b1380, b0723, b1193	ACt2rpp, FRUptspp, GND, LDH_D, SUCDi, TRPS1, TRPS2, TRPS3
7708	-57.6484	EX_succ_e	7.96585	-7.5	0.164791	9	33.8952	-10.6936	-2.84279	26.9332	9.80486	b3844, b0010, b2720, b0388, b2578, b3469, b1380, b1486, b1338	4ABZGLUH, ACt2rpp, CD2abcpp, COBALT2abcpp, CU2abcpp, FADRx, FE3Ri, FLVRx, HG2abcpp, LDH_D, NI2abcpp, ZN2abcpp
7709	-57.6474	EX_succ_e	7.96585	-7.5	0.164791	7	33.8952	-11.0958	-2.84279	26.9332	9.80486	b2539, b0010, b0765, b2933, b1380, b1515, b3241	4HBZt3pp, ACt2rpp, AI2abcpp, CINNDO, LDH_D, PPPNDO, TUNGSabcpp
7710	-57.6474	EX_succ_e	7.96585	-7.5	0.164791	7	33.8952	-11.0958	-2.84279	26.9332	9.80486	b1849, b0312, b0241, b0996, b0010, b1380, b2257	ACt2rpp, BETALDHx, BETALDHy, GART, LA4NTpp, LDH_D
7711	-57.6474	EX_succ_e	7.96585	-7.5	0.164791	7	33.8952	-11.0958	-2.84279	26.9332	9.80486	b3709, b0010, b1380, b1798, b1400, b0874, b1090	2HPTCOAT, ACPPAT120, ACPPAT140, ACPPAT141, ACPPAT160, ACPPAT161, ACPPAT180, ACPPAT181, ACt2rpp, LDH_D
7712	-57.6474	EX_succ_e	7.96585	-7.5	0.164791	7	33.8952	-11.0958	-2.84279	26.9332	9.80486	b3789, b1521, b0010, b0765, b4115, b1761, b1380	ACt2rpp, ARGAGMt7pp, LDH_D, TAGURr, TUNGSabcpp
7713	-57.6474	EX_succ_e	7.96585	-7.5	0.164791	7	33.8952	-11.0958	-2.84279	26.9332	9.80486	b1993, b0010, b0066, b4115, b1737, b1380, b4129	ACBIPGT, ACt2rpp, ADOCBIK, AP4AS, ARGAGMt7pp, CHTBSptspp, LDH_D, THMabcpp
7714	-57.6474	EX_succ_e	7.96585	-7.5	0.164791	7	33.8952	-11.0958	-2.84279	26.9332	9.80486	b2436, b0010, b4115, b3726, b2201, b1380, b0723	ACt2rpp, ARGAGMt7pp, CPPPGO, LDH_D, PHEMEabcpp, PIuabcpp, SUCDi
7715	-57.6474	EX_succ_e	7.96585	-7.5	0.164791	7	33.8952	-11.0958	-2.84279	26.9332	9.80486	b0010, b1709, b3460, b3750, b1380, b1385, b1394	ACt2rpp, ADOCBLabcpp, ALAabcpp, ALDD19xr, CBIuabcpp, CBL1abcpp, ILEabcpp, LDH_D, OXDHCOAT, REPHACCOAI, THRabcpp, VALabcpp
7716	-57.6437	EX_succ_e	7.96644	-7.5	0.16437	7	33.8916	-11.0958	-2.84283	26.9332	9.80119	b2251, b1701, b0010, b4115, b0809, b1380, b1193	ACt2rpp, ARGAGMt7pp, GLNabcpp, LDH_D
7717	-57.6127	EX_succ_e	7.9923	-7.5	0.14593	5	33.4165	-10.6074	-2.72157	26.6039	9.53416	b3844, b4117, b0010, b3737, b1380	ACt2rpp, ARGDC, ATPS4rpp, FADRx, FE3Ri, FLVRx, LDH_D
7718	-57.6127	EX_succ_e	7.9923	-7.5	0.14593	5	33.4165	-10.6074	-2.72157	26.6039	9.53416	b3844, b4117, b0010, b3733, b1380	ACt2rpp, ARGDC, ATPS4rpp, FADRx, FE3Ri, FLVRx, LDH_D
7719	-57.5489	EX_succ_e	7.96585	-7.5	0.164791	8	33.8952	-11.0928	-2.84279	26.9332	9.80486	b2029, b0010, b4115, b3726, b2201, b1380, b0723, b1193	ACt2rpp, ARGAGMt7pp, GND, LDH_D, PHEMEabcpp, PIuabcpp, SUCDi
7720	-57.5474	EX_succ_e	7.96585	-7.5	0.164791	8	33.8952	-11.0958	-2.84279	26.9332	9.80486	b3671, b4322, b3526, b0010, b4115, b1380, b0831, b1990	ACt2rpp, ARGAGMt7pp, DDGLK, GTHRDabcpp, LDH_D, MNNH
7721	-57.5474	EX_succ_e	7.96585	-7.5	0.164791	8	33.8952	-11.0958	-2.84279	26.9332	9.80486	b1993, b0010, b0066, b4115, b1270, b1737, b1380, b4129	ACBIPGT, ACt2rpp, ADOCBIK, AP4AS, ARGAGMt7pp, CBIAT, CBLAT, CHTBSptspp, LDH_D, THMabcpp
7722	-57.5474	EX_succ_e	7.96585	-7.5	0.164791	8	33.8952	-11.0958	-2.84279	26.9332	9.80486	b0010, b1709, b3460, b3750, b1380, b2480, b1385, b1394	ACt2rpp, ADOCBLabcpp, ALAabcpp, ALDD19xr, CBIuabcpp, CBL1abcpp, ILEabcpp, LDH_D, OXDHCOAT, REPHACCOAI, THRabcpp, VALabcpp
7723	-57.5474	EX_succ_e	7.96585	-7.5	0.164791	8	33.8952	-11.0958	-2.84279	26.9332	9.80486	b0337, b0010, b4115, b0752, b0979, b3502, b0040, b1380	ACt2rpp, ARGAGMt7pp, ASO3t8pp, CRNt7pp, CRNt8pp, CSND, CYTBD2pp, LDH_D
7724	-57.5243	EX_succ_e	7.9923	-7.5	0.14593	5	33.4165	-10.7843	-2.72157	26.6039	9.53416	b4117, b0010, b0679, b3732, b1380	ACt2rpp, ARGDC, ATPS4rpp, LDH_D
7725	-57.5127	EX_succ_e	7.9923	-7.5	0.14593	6	33.4165	-10.6074	-2.72157	26.6039	9.53416	b3844, b4117, b1302, b0010, b3737, b1380	ACt2rpp, ARGDC, ATPS4rpp, FADRx, FE3Ri, FLVRx, LDH_D
7726	-57.3028	EX_succ_e	7.9923	-7.5	0.14593	3	32.995	-10.7843	-2.73426	26.2926	9.43658	b0010, b3737, b1380	ACt2rpp, ATPS4rpp, LDH_D
7727	-57.2875	EX_succ_e	7.9923	-7.5	0.14593	4	32.995	-10.6149	-2.73426	26.2926	9.43658	b3844, b0010, b3732, b1380	ACt2rpp, ATPS4rpp, FADRx, FE3Ri, FLVRx, LDH_D
7728	-57.2875	EX_succ_e	7.9923	-7.5	0.14593	4	32.995	-10.6149	-2.73426	26.2926	9.43658	b3844, b0010, b3737, b1380	ACt2rpp, ATPS4rpp, FADRx, FE3Ri, FLVRx, LDH_D
7729	-57.2772	EX_succ_e	7.97472	-7.5	0.158466	5	33.124	-10.6936	-2.91842	26.4472	9.59527	b0720, b3844, b2905, b0010, b1380	ACt2rpp, CS, FADRx, FE3Ri, FLVRx, GLYCL, LDH_D
7730	-57.2028	EX_succ_e	7.9923	-7.5	0.14593	4	32.995	-10.7843	-2.73426	26.2926	9.43658	b3197, b0010, b3735, b1380	ACt2rpp, ATPS4rpp, LDH_D
7731	-57.1875	EX_succ_e	7.9923	-7.5	0.14593	5	32.995	-10.6149	-2.73426	26.2926	9.43658	b3844, b0010, b0765, b3732, b1380	ACt2rpp, ATPS4rpp, FADRx, FE3Ri, FLVRx, LDH_D, TUNGSabcpp
7732	-57.1705	EX_succ_e	7.9748	-7.5	0.158407	6	33.1173	-10.6936	-2.91892	26.4428	9.59339	b1136, b3844, b0010, b3927, b1380, b0826	ACt2rpp, FADRx, FE3Ri, FLVRx, GLYALDtpp, GLYtpp, ICDHyr, LDH_D, MPTSS, UREAtpp
7733	-57.1087	EX_succ_e	7.99257	-7.5	0.145739	5	33.0008	-10.7843	-2.73541	26.2992	9.437	b0010, b4115, b3732, b0809, b1380	ACt2rpp, ARGAGMt7pp, ATPS4rpp, GLNabcpp, LDH_D
7734	-57.1028	EX_succ_e	7.9923	-7.5	0.14593	5	32.995	-10.7843	-2.73426	26.2926	9.43658	b3752, b0010, b4115, b3733, b1380	ACt2rpp, ARGAGMt7pp, ATPS4rpp, LDH_D, RBK
7735	-57.0875	EX_succ_e	7.9923	-7.5	0.14593	6	32.995	-10.6149	-2.73426	26.2926	9.43658	b3844, b0010, b3732, b1380, b4159, b3816	ACt2rpp, ATPS4rpp, FADRx, FE3Ri, FLVRx, LDH_D, MG2tpp, NI2tpp
7736	-57.0761	EX_succ_e	7.97472	-7.5	0.158466	5	33.124	-11.0958	-2.91842	26.4472	9.59527	b0720, b2905, b0010, b2490, b1380	ACt2rpp, CS, GLYCL, LDH_D
7737	-57.0028	EX_succ_e	7.9923	-7.5	0.14593	6	32.995	-10.7843	-2.73426	26.2926	9.43658	b3752, b0010, b3733, b2256, b1380, b0118	ACt2rpp, ATPS4rpp, LDH_D, MICITDr, RBK, UPLA4FNF
7738	-56.9791	EX_succ_e	7.97472	-7.5	0.158466	6	33.124	-11.0897	-2.91842	26.4472	9.59527	b1136, b0825, b2905, b0010, b1380, b2660	ACt2rpp, GLYCL, ICDHyr, LDH_D, SHGO
7739	-56.9563	EX_succ_e	7.97777	-7.5	0.156291	6	32.8945	-10.6764	-2.93656	26.302	9.52898	b0720, b3844, b4117, b0010, b3927, b1380	ACt2rpp, ARGDC, CS, FADRx, FE3Ri, FLVRx, GLYALDtpp, GLYtpp, LDH_D, UREAtpp
7740	-56.8772	EX_succ_e	7.97472	-7.5	0.158466	9	33.124	-10.6936	-2.91842	26.4472	9.59527	b1136, b3844, b0825, b2905, b0010, b4087, b1380, b0624, b2134	ACt2rpp, ALLabcpp, FADRx, FE3Ri, FLVRx, Ftpp, GLYCL, ICDHyr, LDH_D
7741	-56.8563	EX_succ_e	7.97777	-7.5	0.156291	7	32.8945	-10.6764	-2.93656	26.302	9.52898	b2436, b1136, b3844, b0010, b4115, b3927, b1380	ACt2rpp, ARGAGMt7pp, CPPPGO, FADRx, FE3Ri, FLVRx, GLYALDtpp, GLYtpp, ICDHyr, LDH_D, UREAtpp
7742	-56.8563	EX_succ_e	7.97777	-7.5	0.156291	7	32.8945	-10.6764	-2.93656	26.302	9.52898	b1136, b3844, b4198, b0010, b4115, b3927, b1380	ACt2rpp, ARGAGMt7pp, FADRx, FE3Ri, FLVRx, GLYALDtpp, GLYtpp, ICDHyr, LDH_D, UREAtpp
7743	-56.8563	EX_succ_e	7.97777	-7.5	0.156291	7	32.8945	-10.6764	-2.93656	26.302	9.52898	b0720, b3844, b4117, b0010, b2177, b3927, b1380	ACt2rpp, ARGDC, CS, FADRx, FE3Ri, FLVRx, GLYALDtpp, GLYtpp, LDH_D, UREAtpp
7744	-56.8028	EX_succ_e	7.9923	-7.5	0.14593	8	32.995	-10.7843	-2.73426	26.2926	9.43658	b1398, b0351, b3752, b0010, b3733, b2256, b1380, b0118	ACt2rpp, ATPS4rpp, LDH_D, MICITDr, PACCOAL, RBK, UPLA4FNF
7745	-56.8028	EX_succ_e	7.9923	-7.5	0.14593	8	32.995	-10.7843	-2.73426	26.2926	9.43658	b0078, b0010, b3460, b3735, b1380, b2480, b1385, b1394	ACt2rpp, ALAabcpp, ALDD19xr, ATPS4rpp, ILEabcpp, LDH_D, OXDHCOAT, REPHACCOAI, THRabcpp, VALabcpp
7746	-56.7629	EX_succ_e	7.97769	-7.5	0.156349	8	32.9011	-10.6764	-2.93607	26.3063	9.53084	b0720, b2036, b3844, b4117, b2903, b0010, b2927, b1380	ACt2rpp, ARGDC, CS, FADRx, FE3Ri, FLVRx, GLYCL, LDH_D, UDPGALM
7747	-56.7563	EX_succ_e	7.97777	-7.5	0.156291	8	32.8945	-10.6764	-2.93656	26.302	9.52898	b0720, b3844, b4117, b0010, b2996, b3927, b1380, b0465	ACt2rpp, ARGDC, CS, FADRx, FE3Ri, FLVRx, GLYALDtpp, GLYtpp, LDH_D, UREAtpp
7748	-56.7028	EX_succ_e	7.9923	-7.5	0.14593	9	32.995	-10.7843	-2.73426	26.2926	9.43658	b0078, b0010, b3290, b3460, b3735, b1380, b2480, b1385, b1394	ACt2rpp, ALAabcpp, ALDD19xr, ATPS4rpp, ILEabcpp, LDH_D, OXDHCOAT, REPHACCOAI, THRabcpp, VALabcpp
7749	-56.6582	EX_succ_e	7.97777	-7.5	0.156291	7	32.8945	-11.0725	-2.93656	26.302	9.52898	b2436, b1136, b0010, b1291, b4115, b3927, b1380	ACt2rpp, ARGAGMt7pp, CPPPGO, GLYALDtpp, GLYtpp, ICDHyr, LDH_D, UREAtpp
7750	-56.5563	EX_succ_e	7.97777	-7.5	0.156291	10	32.8945	-10.6764	-2.93656	26.302	9.52898	b1136, b3115, b3844, b0010, b4115, b4265, b0854, b3927, b1380, b1734	5DGLCNt2rpp, ACt2rpp, ARGAGMt7pp, FADRx, FE3Ri, FLVRx, GLYALDtpp, GLYtpp, ICDHyr, IDONt2rpp, LDH_D, MC6PH, PPAKr, UREAtpp
7751	-56.5563	EX_succ_e	7.97777	-7.5	0.156291	10	32.8945	-10.6764	-2.93656	26.302	9.52898	b1136, b3844, b0010, b0932, b4115, b4265, b0854, b3927, b1380, b1734	5DGLCNt2rpp, ACt2rpp, ARGAGMt7pp, FADRx, FE3Ri, FLVRx, GLYALDtpp, GLYtpp, ICDHyr, IDONt2rpp, LDH_D, MC6PH, UREAtpp
7752	-55.4809	EX_succ_e	7.2648	-7.5	0.163813	5	31.3191	-10.6764	-2.58774	24.7322	9.17463	b1136, b3844, b4117, b0010, b1380	ACt2rpp, ARGDC, FADRx, FE3Ri, FLVRx, ICDHyr, LDH_D
7753	-55.3828	EX_succ_e	7.2648	-7.5	0.163813	4	31.3191	-11.0725	-2.58774	24.7322	9.17463	b4117, b0617, b0010, b1380	ACt2rpp, ARGDC, CITL, LDH_D
7754	-55.3828	EX_succ_e	7.2648	-7.5	0.163813	4	31.3191	-11.0725	-2.58774	24.7322	9.17463	b4117, b0616, b0010, b1380	ACt2rpp, ARGDC, CITL, LDH_D
7755	-55.3809	EX_succ_e	7.2648	-7.5	0.163813	6	31.3191	-10.6764	-2.58774	24.7322	9.17463	b1136, b3844, b4117, b0010, b1380, b2021	ACt2rpp, ARGDC, FADRx, FE3Ri, FLVRx, HSTPT, ICDHyr, LDH_D
7756	-55.3809	EX_succ_e	7.2648	-7.5	0.163813	6	31.3191	-10.6764	-2.58774	24.7322	9.17463	b3844, b4117, b0617, b0010, b3450, b1380	ACt2rpp, ARGDC, CITL, FADRx, FE3Ri, FLVRx, G3PCabcpp, G3PEabcpp, G3PGabcpp, G3PIabcpp, G3PSabcpp, GLYC2Pabcpp, GLYC3Pabcpp, LDH_D
7757	-55.3809	EX_succ_e	7.2648	-7.5	0.163813	6	31.3191	-10.6764	-2.58774	24.7322	9.17463	b3844, b4117, b0614, b0010, b1246, b1380	ACt2rpp, ARGDC, CITL, FADRx, FE3Ri, FLVRx, LDH_D
7758	-55.3809	EX_succ_e	7.2648	-7.5	0.163813	6	31.3191	-10.6764	-2.58774	24.7322	9.17463	b3844, b4117, b0617, b0010, b3610, b1380	ACt2rpp, ARGDC, CITL, FADRx, FE3Ri, FLVRx, LDH_D
7759	-54.708	EX_succ_e	8.08974	-7.5	0.0764348	6	30.3541	-10.0921	-2.92765	24.8972	8.38456	b3844, b4117, b2903, b0010, b3919, b1380	ACt2rpp, ARGDC, FADRx, FE3Ri, FLVRx, GLYCL, LDH_D, TPI
7760	-54.6256	EX_succ_e	7.99739	-7.5	0.142297	4	30.2881	-10.525	-2.70903	24.2434	8.75375	b4117, b0010, b0114, b1380	ACt2rpp, ARGDC, LDH_D, PDH
7761	-54.6125	EX_succ_e	8.08977	-7.5	0.0764107	7	30.3586	-10.0921	-2.92736	24.9005	8.38541	b3844, b3517, b0010, b4115, b3919, b3927, b1380	ACt2rpp, ARGAGMt7pp, FADRx, FE3Ri, FLVRx, GLYALDtpp, GLYtpp, LDH_D, TPI, UREAtpp
7762	-54.5778	EX_succ_e	7.99739	-7.5	0.142297	5	30.2881	-10.4206	-2.70903	24.2434	8.75375	b3844, b4117, b0010, b0114, b1380	ACt2rpp, ARGDC, FADRx, FE3Ri, FLVRx, LDH_D, PDH
7763	-54.4593	EX_succ_e	7.99479	-7.5	0.144155	4	30.13	-10.5414	-2.72747	24.1246	8.73293	b2502, b0010, b0114, b1380	ACt2rpp, LDH_D, PDH
7764	-54.4393	EX_succ_e	8.08717	-7.5	0.0782658	5	29.9966	-10.1146	-2.94924	24.6291	8.31674	b3844, b2905, b0010, b3919, b1380	ACt2rpp, FADRx, FE3Ri, FLVRx, GLYCL, LDH_D, TPI
7765	-54.0019	EX_succ_e	8.00636	-7.5	0.135902	5	29.6786	-10.3534	-2.71252	23.8252	8.56594	b3844, b0010, b0114, b3927, b1380	ACt2rpp, FADRx, FE3Ri, FLVRx, GLYALDtpp, GLYtpp, LDH_D, PDH, UREAtpp
7766	-53.9483	EX_succ_e	8.00636	-7.5	0.135902	5	29.6786	-10.4607	-2.71252	23.8252	8.56594	b1264, b0010, b0114, b3927, b1380	ACt2rpp, ANS, GLYALDtpp, GLYtpp, LDH_D, PDH, UREAtpp
7767	-53.9483	EX_succ_e	8.00636	-7.5	0.135902	5	29.6786	-10.4607	-2.71252	23.8252	8.56594	b0980, b0010, b0114, b3927, b1380	ACt2rpp, GLYALDtpp, GLYtpp, LDH_D, NTP3pp, PDH, PHYTSpp, UREAtpp
7768	-53.7864	EX_succ_e	8.00936	-7.5	0.133762	7	29.6548	-10.3368	-2.71269	23.8214	8.54602	b3844, b0010, b4115, b0114, b1723, b3927, b1380	ACt2rpp, ARGAGMt7pp, FADRx, FE3Ri, FLVRx, GLYALDtpp, GLYtpp, LDH_D, PDH, UREAtpp
7769	-53.5924	EX_succ_e	6.8769	-7.5	0.163813	4	29.3392	-10.6936	-2.47957	23.1135	8.70522	b1136, b3844, b0010, b1380	ACt2rpp, FADRx, FE3Ri, FLVRx, ICDHyr, LDH_D
7770	-53.5924	EX_succ_e	6.8769	-7.5	0.163813	4	29.3392	-10.6936	-2.47957	23.1135	8.70522	b3844, b0617, b0010, b1380	ACt2rpp, CITL, FADRx, FE3Ri, FLVRx, LDH_D
7771	-53.5596	EX_succ_e	6.9002	-7.5	0.157723	5	29.3476	-10.5759	-2.48506	23.1658	8.66689	b3844, b4122, b0010, b1380, b1206	ACt2rpp, ASPtpp, DTARTD, FADRx, FE3Ri, FLVRx, FUMt1pp, LDH_D, SUCCt1pp
7772	-53.4943	EX_succ_e	6.8769	-7.5	0.163813	3	29.3392	-11.0897	-2.47957	23.1135	8.70522	b0617, b0010, b1380	ACt2rpp, CITL, LDH_D
7773	-53.4943	EX_succ_e	6.8769	-7.5	0.163813	3	29.3392	-11.0897	-2.47957	23.1135	8.70522	b0614, b0010, b1380	ACt2rpp, CITL, LDH_D
7774	-53.4943	EX_succ_e	6.8769	-7.5	0.163813	3	29.3392	-11.0897	-2.47957	23.1135	8.70522	b1136, b0010, b1380	ACt2rpp, ICDHyr, LDH_D
7775	-53.4924	EX_succ_e	6.8769	-7.5	0.163813	5	29.3392	-10.6936	-2.47957	23.1135	8.70522	b3844, b0614, b0010, b3714, b1380	ACt2rpp, CITL, FADRx, FE3Ri, FLVRx, LDH_D
7776	-53.4875	EX_succ_e	8.00729	-7.5	0.135235	6	29.2636	-10.3522	-2.73228	23.5296	8.46628	b2502, b3844, b2905, b0010, b0114, b1380	ACt2rpp, FADRx, FE3Ri, FLVRx, GLYCL, LDH_D, PDH
7777	-53.4864	EX_succ_e	8.00936	-7.5	0.133762	10	29.6548	-10.3368	-2.71269	23.8214	8.54602	b3844, b3583, b0010, b2424, b4115, b1329, b0114, b1723, b3927, b1380	ACt2rpp, ARGAGMt7pp, FADRx, FE3Ri, FLVRx, GLYALDtpp, GLYtpp, LDH_D, PDH, SELabcpp, SLNTabcpp, TSULabcpp, UREAtpp
7778	-53.4326	EX_succ_e	8.00936	-7.5	0.133762	10	29.6548	-10.4443	-2.71269	23.8214	8.54602	b0593, b0010, b2424, b4115, b0114, b2934, b1723, b1308, b3927, b1380	ACt2rpp, ARGAGMt7pp, CYANSTpp, GLYALDtpp, GLYtpp, ICHORS_copy1, LDH_D, PDH, SELabcpp, SLNTabcpp, TSULabcpp, UREAtpp
7779	-53.2596	EX_succ_e	6.9002	-7.5	0.157723	8	29.3476	-10.5759	-2.48506	23.1658	8.66689	b3844, b0517, b0010, b0813, b1442, b1380, b3291, b1206	ACt2rpp, ASPtpp, FADRx, FE3Ri, FLVRx, FUMt1pp, LDH_D, SUCCt1pp, URDGLYCD
7780	-53.1943	EX_succ_e	6.8769	-7.5	0.163813	6	29.3392	-11.0897	-2.47957	23.1135	8.70522	b1136, b3430, b4198, b0010, b4115, b1380	ACt2rpp, ARGAGMt7pp, GLGC, ICDHyr, LDH_D
7781	-53.1924	EX_succ_e	6.8769	-7.5	0.163813	8	29.3392	-10.6936	-2.47957	23.1135	8.70522	b2930, b3844, b2787, b1493, b0617, b0010, b4115, b1380	ACt2rpp, ARGAGMt7pp, CITL, FADRx, FE3Ri, FLVRx, LDH_D
7782	-51.313	EX_succ_e	7.79606	-7.5	0.285889	4	27.4945	-11.5631	-2.80703	21.2442	9.05731	b4117, b2903, b3736, b1378	ARGDC, ATPS4rpp, GLYCL, POR5
7783	-51.2405	EX_succ_e	7.79606	-7.5	0.285889	4	27.5234	-11.7657	-2.80473	21.2644	9.06371	b3844, b4115, b3927, b1378	ARGAGMt7pp, FADRx, FE3Ri, FLVRx, GLYALDtpp, GLYtpp, POR5, UREAtpp
7784	-51.2402	EX_succ_e	7.79187	-7.5	0.288878	1	27.1302	-11.5801	-2.80724	20.948	8.98944	b3735	ATPS4rpp
7785	-51.2383	EX_succ_e	7.79607	-7.5	0.285887	4	27.5235	-11.7704	-2.80473	21.2645	9.06374	b2464, b3927, b2701, b3924	FLDR2, GLYALDtpp, GLYtpp, UREAtpp
7786	-51.1805	EX_succ_e	7.79187	-7.5	0.288878	2	27.1302	-11.4994	-2.80724	20.948	8.98944	b3737, b1380	ATPS4rpp, LDH_D
7787	-51.1805	EX_succ_e	7.79187	-7.5	0.288878	2	27.1302	-11.4994	-2.80724	20.948	8.98944	b3731, b1380	ATPS4rpp, LDH_D
7788	-51.0805	EX_succ_e	7.79187	-7.5	0.288878	3	27.1302	-11.4994	-2.80724	20.948	8.98944	b2905, b3736, b1380	ATPS4rpp, GLYCL, LDH_D
7789	-51.0805	EX_succ_e	7.79187	-7.5	0.288878	3	27.1302	-11.4994	-2.80724	20.948	8.98944	b0828, b3731, b1380	ATPS4rpp, LDH_D
7790	-51.0805	EX_succ_e	7.79187	-7.5	0.288878	3	27.1302	-11.4994	-2.80724	20.948	8.98944	b3752, b3733, b1380	ATPS4rpp, LDH_D, RBK
7791	-51.0405	EX_succ_e	7.79606	-7.5	0.285889	6	27.5234	-11.7657	-2.80473	21.2644	9.06371	b3057, b3844, b4117, b3927, b1380, b1378	ARGDC, FADRx, FE3Ri, FLVRx, GLYALDtpp, GLYtpp, LDH_D, POR5, UREAtpp
7792	-51.0402	EX_succ_e	7.79187	-7.5	0.288878	3	27.1302	-11.5801	-2.80724	20.948	8.98944	b3844, b3902, b3732	ATPS4rpp, FADRx, FE3Ri, FLVRx, RMPA
7793	-51.0402	EX_succ_e	7.79187	-7.5	0.288878	3	27.1302	-11.5801	-2.80724	20.948	8.98944	b4115, b3731, b4291	ARGAGMt7pp, ATPS4rpp, FE3DCITtonex
7794	-51.0125	EX_succ_e	7.79187	-7.5	0.288878	4	27.1302	-11.4354	-2.80724	20.948	8.98944	b3844, b4115, b3733, b1380	ARGAGMt7pp, ATPS4rpp, FADRx, FE3Ri, FLVRx, LDH_D
7795	-51.0125	EX_succ_e	7.79187	-7.5	0.288878	4	27.1302	-11.4354	-2.80724	20.948	8.98944	b3844, b2905, b3736, b1380	ATPS4rpp, FADRx, FE3Ri, FLVRx, GLYCL, LDH_D
7796	-51.0125	EX_succ_e	7.79187	-7.5	0.288878	4	27.1302	-11.4354	-2.80724	20.948	8.98944	b3844, b2905, b3738, b1380	ATPS4rpp, FADRx, FE3Ri, FLVRx, GLYCL, LDH_D
7797	-51.0125	EX_succ_e	7.79187	-7.5	0.288878	4	27.1302	-11.4354	-2.80724	20.948	8.98944	b3844, b2803, b3733, b1380	ATPS4rpp, FADRx, FCLK, FE3Ri, FLVRx, LDH_D
7798	-50.9947	EX_succ_e	7.79187	-7.5	0.288878	4	27.1302	-11.471	-2.80724	20.948	8.98944	b4117, b3875, b3735, b1380	ARGDC, ATPS4rpp, DHPStex, LDH_D, SQtex
7799	-50.9947	EX_succ_e	7.79187	-7.5	0.288878	4	27.1302	-11.471	-2.80724	20.948	8.98944	b4117, b2903, b3737, b1380	ARGDC, ATPS4rpp, GLYCL, LDH_D
7800	-50.9805	EX_succ_e	7.79187	-7.5	0.288878	4	27.1302	-11.4994	-2.80724	20.948	8.98944	b4115, b1197, b3737, b1380	ARGAGMt7pp, ATPS4rpp, LDH_D, TREHpp
7801	-50.9805	EX_succ_e	7.79187	-7.5	0.288878	4	27.1302	-11.4994	-2.80724	20.948	8.98944	b0963, b2421, b3736, b1380	ATPS4rpp, LDH_D, MGSA
7802	-50.9708	EX_succ_e	7.79606	-7.5	0.285889	2	27.056	-11.7704	-2.84194	20.9378	8.96006	b3844, b1378	FADRx, FE3Ri, FLVRx, POR5
7803	-50.9708	EX_succ_e	7.79606	-7.5	0.285889	2	27.056	-11.7704	-2.84194	20.9378	8.96006	b3350, b1378	POR5
7804	-50.9402	EX_succ_e	7.79187	-7.5	0.288878	4	27.1302	-11.5801	-2.80724	20.948	8.98944	b3844, b2903, b3738, b0315	ATPS4rpp, FADRx, FE3Ri, FLVRx, GLYCL
7805	-50.9402	EX_succ_e	7.79187	-7.5	0.288878	4	27.1302	-11.5801	-2.80724	20.948	8.98944	b3844, b2601, b2179, b3738	ATPS4rpp, FADRx, FE3Ri, FLVRx
7806	-50.9402	EX_succ_e	7.79187	-7.5	0.288878	4	27.1302	-11.5801	-2.80724	20.948	8.98944	b0828, b3747, b4115, b3731	ARGAGMt7pp, ATPS4rpp
7807	-50.9125	EX_succ_e	7.79187	-7.5	0.288878	5	27.1302	-11.4354	-2.80724	20.948	8.98944	b3844, b2905, b3736, b1380, b1679	ATPS4rpp, FADRx, FE3Ri, FLVRx, GLYCL, LDH_D, S2FE2SR, S2FE2SS, S2FE2SS2, SCYSDS
7808	-50.9125	EX_succ_e	7.79187	-7.5	0.288878	5	27.1302	-11.4354	-2.80724	20.948	8.98944	b3844, b3589, b2905, b3738, b1380	ATPS4rpp, FADRx, FE3Ri, FLVRx, GLYCL, LDH_D
7809	-50.9045	EX_succ_e	7.79681	-7.5	0.285355	4	27.0542	-11.4994	-2.82153	20.9237	8.95207	b3052, b3733, b3927, b1380	ATPS4rpp, GLYALDtpp, GLYtpp, GMHEPAT, GMHEPK, LDH_D, UREAtpp
7810	-50.9045	EX_succ_e	7.79681	-7.5	0.285355	4	27.0542	-11.4994	-2.82153	20.9237	8.95207	b3731, b3927, b1380, b1249	ATPS4rpp, GLYALDtpp, GLYtpp, LDH_D, UREAtpp
7811	-50.9045	EX_succ_e	7.79681	-7.5	0.285355	4	27.0542	-11.4994	-2.82153	20.9237	8.95207	b0828, b3731, b3927, b1380	ATPS4rpp, GLYALDtpp, GLYtpp, LDH_D, UREAtpp
7812	-50.9045	EX_succ_e	7.79681	-7.5	0.285355	4	27.0542	-11.4994	-2.82153	20.9237	8.95207	b4352, b3735, b3927, b1380	ATPS4rpp, GLYALDtpp, GLYtpp, LDH_D, UREAtpp
7813	-50.8947	EX_succ_e	7.79187	-7.5	0.288878	5	27.1302	-11.471	-2.80724	20.948	8.98944	b3812, b4117, b1759, b3737, b1380	ARGDC, ATPS4rpp, LDH_D
7814	-50.8877	EX_succ_e	7.79681	-7.5	0.285355	4	27.0692	-11.5631	-2.82153	20.9359	8.9548	b4117, b3731, b2933, b3927	ARGDC, ATPS4rpp, GLYALDtpp, GLYtpp, UREAtpp
7815	-50.8805	EX_succ_e	7.79187	-7.5	0.288878	5	27.1302	-11.4994	-2.80724	20.948	8.98944	b3600, b4115, b3737, b2167, b1380	ARGAGMt7pp, ATPS4rpp, FRUptspp, LDH_D, M1PD
7816	-50.8775	EX_succ_e	7.79681	-7.5	0.285355	5	27.0692	-11.3835	-2.82153	20.9359	8.9548	b3844, b4117, b3737, b3927, b1380	ARGDC, ATPS4rpp, FADRx, FE3Ri, FLVRx, GLYALDtpp, GLYtpp, LDH_D, UREAtpp
7817	-50.8731	EX_succ_e	7.79606	-7.5	0.285889	3	27.056	-11.7657	-2.84194	20.9378	8.96006	b4117, b2903, b1378	ARGDC, GLYCL, POR5
7818	-50.8731	EX_succ_e	7.79606	-7.5	0.285889	3	27.056	-11.7657	-2.84194	20.9378	8.96006	b4117, b3290, b1378	ARGDC, POR5
7819	-50.8731	EX_succ_e	7.79607	-7.5	0.285887	3	27.0559	-11.7657	-2.84196	20.9378	8.96005	b4117, b0826, b3924	ARGDC, FLDR2, MPTSS
7820	-50.8731	EX_succ_e	7.79607	-7.5	0.285887	3	27.0559	-11.7657	-2.84196	20.9378	8.96005	b4117, b1380, b3924	ARGDC, FLDR2, LDH_D
7821	-50.8708	EX_succ_e	7.79606	-7.5	0.285889	3	27.056	-11.7704	-2.84194	20.9378	8.96006	b3350, b1380, b1378	LDH_D, POR5
7822	-50.8708	EX_succ_e	7.79606	-7.5	0.285889	3	27.056	-11.7704	-2.84194	20.9378	8.96006	b2905, b1380, b1378	GLYCL, LDH_D, POR5
7823	-50.8708	EX_succ_e	7.79606	-7.5	0.285889	3	27.056	-11.7704	-2.84194	20.9378	8.96006	b3089, b1380, b1378	LDH_D, POR5, SERt4pp, THRt4pp
7824	-50.8707	EX_succ_e	7.79607	-7.5	0.285887	3	27.0559	-11.7704	-2.84196	20.9378	8.96005	b0386, b1338, b3924	4ABZGLUH, FLDR2, P5CR
7825	-50.8487	EX_succ_e	7.79187	-7.5	0.288878	5	27.1302	-11.5631	-2.80724	20.948	8.98944	b3844, b4117, b2903, b3731, b2014	ARGDC, ATPS4rpp, FADRx, FE3Ri, FLVRx, GLYCL
7826	-50.8439	EX_succ_e	7.79681	-7.5	0.285355	5	27.0542	-11.4206	-2.82153	20.9237	8.95207	b3844, b3579, b3734, b3927, b1380	23DOGULNt4pp, ATPS4rpp, FADRx, FE3Ri, FLVRx, GLYALDtpp, GLYtpp, LDH_D, UREAtpp, XYLUt2pp
7827	-50.8439	EX_succ_e	7.79681	-7.5	0.285355	5	27.0542	-11.4206	-2.82153	20.9237	8.95207	b3126, b3844, b3733, b3927, b1380	ATPS4rpp, FADRx, FE3Ri, FLVRx, GLCRAL, GLYALDtpp, GLYtpp, LDH_D, UREAtpp
7828	-50.8439	EX_succ_e	7.79681	-7.5	0.285355	5	27.0542	-11.4206	-2.82153	20.9237	8.95207	b3844, b3737, b3927, b1380, b0494	ATPS4rpp, FADRx, FE3Ri, FLVRx, GLYALDtpp, GLYtpp, LDH_D, LPLIPAL1A120pp, LPLIPAL1A140pp, LPLIPAL1A141pp, LPLIPAL1A160pp, LPLIPAL1A161pp, LPLIPAL1A180pp, LPLIPAL1A181pp, LPLIPAL1E120pp, LPLIPAL1E140pp, LPLIPAL1E141pp, LPLIPAL1E160pp, LPLIPAL1E161pp, LPLIPAL1E180pp, LPLIPAL1E181pp, LPLIPAL1G120pp, LPLIPAL1G140pp, LPLIPAL1G141pp, LPLIPAL1G160pp, LPLIPAL1G161pp, LPLIPAL1G180pp, LPLIPAL1G181pp, UREAtpp
7829	-50.8412	EX_succ_e	7.79923	-7.5	0.283629	4	27.0313	-11.5801	-2.82164	20.9178	8.93509	b3846, b4352, b3735, b3927	ATPS4rpp, CTECOAI6, CTECOAI7, CTECOAI8, GLYALDtpp, GLYtpp, UREAtpp
7830	-50.8402	EX_succ_e	7.79187	-7.5	0.288878	5	27.1302	-11.5801	-2.80724	20.948	8.98944	b3951, b2049, b2905, b3736, b1679	ATPS4rpp, GLYCL, MAN1PT2, S2FE2SR, S2FE2SS, S2FE2SS2, SCYSDS
7831	-50.7947	EX_succ_e	7.79187	-7.5	0.288878	6	27.1302	-11.471	-2.80724	20.948	8.98944	b3812, b4117, b2903, b3460, b3737, b1380	ALAabcpp, ARGDC, ATPS4rpp, GLYCL, ILEabcpp, LDH_D, THRabcpp, VALabcpp
7832	-50.7947	EX_succ_e	7.79187	-7.5	0.288878	6	27.1302	-11.471	-2.80724	20.948	8.98944	b1611, b4117, b2903, b3732, b4478, b1380	ARGDC, ATPS4rpp, GALCTND, GLYCL, LDH_D
7833	-50.7877	EX_succ_e	7.79681	-7.5	0.285355	5	27.0692	-11.5631	-2.82153	20.9359	8.9548	b3052, b3844, b4117, b3733, b3927	ARGDC, ATPS4rpp, FADRx, FE3Ri, FLVRx, GLYALDtpp, GLYtpp, GMHEPAT, GMHEPK, UREAtpp
7834	-50.7805	EX_succ_e	7.79187	-7.5	0.288878	6	27.1302	-11.4994	-2.80724	20.948	8.98944	b1398, b2903, b3736, b3350, b1380, b0709	ATPS4rpp, GLYCL, LDH_D, PACCOAL
7835	-50.7775	EX_succ_e	7.79681	-7.5	0.285355	6	27.0692	-11.3835	-2.82153	20.9359	8.9548	b3844, b4117, b3731, b3927, b1380, b1990	ARGDC, ATPS4rpp, FADRx, FE3Ri, FLVRx, GLYALDtpp, GLYtpp, LDH_D, UREAtpp
7836	-50.7731	EX_succ_e	7.79606	-7.5	0.285889	4	27.056	-11.7657	-2.84194	20.9378	8.96006	b4117, b2903, b3722, b1378	ARGDC, GLYCL, POR5
7837	-50.7708	EX_succ_e	7.79606	-7.5	0.285889	4	27.056	-11.7704	-2.84194	20.9378	8.96006	b2905, b3001, b1380, b1378	GLYCL, LDH_D, POR5
7838	-50.7707	EX_succ_e	7.79607	-7.5	0.285887	4	27.0559	-11.7704	-2.84196	20.9378	8.96005	b3844, b4198, b1380, b3924	FADRx, FE3Ri, FLDR2, FLVRx, LDH_D
7839	-50.7642	EX_succ_e	7.79681	-7.5	0.285355	5	27.0542	-11.5801	-2.82153	20.9237	8.95207	b0261, b3737, b4019, b3927, b0613	ATPS4rpp, GLYALDtpp, GLYtpp, HCYSMT, HCYSMT2, TPRDCOAS, UREAtpp
7840	-50.7125	EX_succ_e	7.79187	-7.5	0.288878	7	27.1302	-11.4354	-2.80724	20.948	8.98944	b3844, b2601, b2905, b2179, b2485, b3738, b1380	ATPS4rpp, FADRx, FE3Ri, FLVRx, GLYCL, LDH_D
7841	-50.6877	EX_succ_e	7.79681	-7.5	0.285355	6	27.0692	-11.5631	-2.82153	20.9359	8.9548	b0261, b4115, b3737, b4019, b3927, b0613	ARGAGMt7pp, ATPS4rpp, GLYALDtpp, GLYtpp, HCYSMT, HCYSMT2, TPRDCOAS, UREAtpp
7842	-50.6775	EX_succ_e	7.79681	-7.5	0.285355	7	27.0692	-11.3835	-2.82153	20.9359	8.9548	b3844, b4117, b3127, b3731, b3927, b1380, b1990	ARGDC, ATPS4rpp, FADRx, FE3Ri, FLVRx, GLYALDtpp, GLYtpp, LDH_D, UREAtpp
7843	-50.6731	EX_succ_e	7.79607	-7.5	0.285887	5	27.0559	-11.7657	-2.84196	20.9378	8.96005	b3844, b4117, b2903, b1380, b3924	ARGDC, FADRx, FE3Ri, FLDR2, FLVRx, GLYCL, LDH_D
7844	-50.6708	EX_succ_e	7.79606	-7.5	0.285889	5	27.056	-11.7704	-2.84194	20.9378	8.96006	b2905, b2871, b1380, b3542, b1378	CGLYabcpp, DAPAL, GLYCL, LDH_D, POR5, PROGLYabcpp
7845	-50.6708	EX_succ_e	7.79606	-7.5	0.285889	5	27.056	-11.7704	-2.84194	20.9378	8.96006	b2901, b3844, b2905, b1380, b1378	FADRx, FE3Ri, FLVRx, GLYCL, LDH_D, POR5
7846	-50.6625	EX_succ_e	7.79681	-7.5	0.285355	7	27.0692	-11.4133	-2.82153	20.9359	8.9548	b2029, b4117, b2738, b3738, b3927, b1380, b0827	ARGDC, ATPS4rpp, BMOCOS, BWCOS, GLYALDtpp, GLYtpp, GND, LDH_D, MOCOS, UREAtpp, WCOS
7847	-50.6471	EX_succ_e	7.79852	-7.5	0.284135	5	27.0323	-11.7704	-2.84232	20.9318	8.94282	b3846, b3197, b3844, b1380, b1378	CTECOAI6, CTECOAI7, CTECOAI8, FADRx, FE3Ri, FLVRx, LDH_D, POR5
7848	-50.6125	EX_succ_e	7.79187	-7.5	0.288878	8	27.1302	-11.4354	-2.80724	20.948	8.98944	b4069, b3844, b2601, b2905, b2179, b3738, b0931, b1380	ACS, ATPS4rpp, FADRx, FE3Ri, FLVRx, GLYCL, LDH_D, NAMNPP
7849	-50.6001	EX_succ_e	7.79606	-7.5	0.285889	7	27.056	-11.5116	-2.84194	20.9378	8.96006	b3844, b4117, b2903, b1603, b1380, b1378, b2262	ARGDC, DHNCOAS, FADRx, FE3Ri, FLVRx, GLYCL, LDH_D, POR5, THD2pp
7850	-50.5731	EX_succ_e	7.79606	-7.5	0.285889	6	27.056	-11.7657	-2.84194	20.9378	8.96006	b1261, b3197, b3844, b4117, b2903, b1378	ARGDC, FADRx, FE3Ri, FLVRx, GLYCL, POR5, TRPS1, TRPS2, TRPS3
7851	-50.5731	EX_succ_e	7.79606	-7.5	0.285889	6	27.056	-11.7657	-2.84194	20.9378	8.96006	b3844, b4117, b2903, b1125, b1380, b1378	ARGDC, FADRx, FE3Ri, FLVRx, GLYCL, LDH_D, POR5
7852	-50.5707	EX_succ_e	7.79607	-7.5	0.285887	6	27.0559	-11.7704	-2.84196	20.9378	8.96005	b3844, b0675, b2905, b0929, b1380, b3924	FADRx, FE3Ri, FLDR2, FLVRx, GLYCL, LDH_D
7853	-50.5295	EX_succ_e	7.79187	-7.5	0.288878	9	27.1302	-11.4015	-2.80724	20.948	8.98944	b3844, b4117, b3359, b2903, b0957, b3738, b2678, b1380, b0724	ARGDC, ATPS4rpp, CRNDabcpp, CRNabcpp, CTBTabcpp, FADRx, FE3Ri, FLVRx, GLYCL, LDH_D, PROabcpp, SUCDi
7854	-50.4495	EX_succ_e	7.79852	-7.5	0.284135	7	27.0323	-11.7657	-2.84232	20.9318	8.94282	b1261, b3846, b3197, b3844, b4117, b2903, b1378	ARGDC, CTECOAI6, CTECOAI7, CTECOAI8, FADRx, FE3Ri, FLVRx, GLYCL, POR5, TRPS1, TRPS2, TRPS3
7855	-50.3622	EX_succ_e	7.60776	-7.5	0.290955	4	26.4762	-11.4279	-2.70672	20.3464	8.83651	b0928, b3844, b2463, b1380	CYSTA, FADRx, FE3Ri, FLVRx, LDH_D, ME2
7856	-50.3622	EX_succ_e	7.60776	-7.5	0.290955	4	26.4762	-11.4279	-2.70672	20.3464	8.83651	b3844, b2463, b3927, b1380	FADRx, FE3Ri, FLVRx, GLYALDtpp, GLYtpp, LDH_D, ME2, UREAtpp
7857	-50.2622	EX_succ_e	7.60776	-7.5	0.290955	5	26.4762	-11.4279	-2.70672	20.3464	8.83651	b3844, b2463, b0652, b3927, b1380	ASPabcpp, FADRx, FE3Ri, FLVRx, GLUabcpp, GLYALDtpp, GLYtpp, LDH_D, ME2, UREAtpp
7858	-49.8736	EX_succ_e	7.42688	-7.5	0.290758	2	25.7629	-11.3786	-2.63551	19.7371	8.66129	b3844, b2413	FADRx, FE3Ri, FLVRx, SO4t2pp
7859	-49.7909	EX_succ_e	7.47746	-7.5	0.28624	2	25.8761	-11.7704	-2.65346	19.8703	8.65919	b3844, b1695	ACOAD1fr, FADRx, FE3Ri, FLVRx
7860	-49.79	EX_succ_e	7.47723	-7.5	0.28624	2	25.8752	-11.7704	-2.65337	19.8696	8.65897	b2541, b1695	ACOAD1fr, DHCIND, DHPPD
7861	-49.79	EX_succ_e	7.47723	-7.5	0.28624	2	25.8752	-11.7704	-2.65337	19.8696	8.65897	b1380, b0221	ACOAD1f, ACOAD2f, ACOAD3f, ACOAD4f, ACOAD5f, ACOAD6f, ACOAD7f, ACOAD8f, LDH_D
7862	-49.7801	EX_succ_e	7.42655	-7.5	0.290955	1	25.7653	-11.7704	-2.63547	19.7376	8.66317	b3844	FADRx, FE3Ri, FLVRx
7863	-49.7769	EX_succ_e	7.42655	-7.5	0.290955	2	25.7653	-11.5768	-2.63547	19.7376	8.66317	b3844, b1602	FADRx, FE3Ri, FLVRx, THD2pp
7864	-49.729	EX_succ_e	7.47299	-7.5	0.289189	3	25.9142	-11.7704	-2.65297	19.8793	8.68788	b3846, b3844, b3892	CTECOAI6, CTECOAI7, CTECOAI8, FADRx, FE3Ri, FLVRx
7865	-49.7063	EX_succ_e	7.42655	-7.5	0.290955	3	25.7653	-11.518	-2.63547	19.7376	8.66317	b3844, b1602, b1380	FADRx, FE3Ri, FLVRx, LDH_D, THD2pp
7866	-49.6932	EX_succ_e	7.47746	-7.5	0.28624	3	25.8761	-11.7657	-2.65346	19.8703	8.65919	b2836, b3844, b4117	2AGPEAT120, 2AGPEAT140, 2AGPEAT141, 2AGPEAT160, 2AGPEAT161, 2AGPEAT180, 2AGPEAT181, 2AGPGAT120, 2AGPGAT140, 2AGPGAT141, 2AGPGAT160, 2AGPGAT161, 2AGPGAT180, 2AGPGAT181, AACPS1, AACPS2, AACPS3, AACPS4, AACPS5, AACPS6, AACPS7, AACPS8, AACPS9, ARGDC, FADRx, FE3Ri, FLVRx
7867	-49.6923	EX_succ_e	7.47723	-7.5	0.28624	3	25.8752	-11.7657	-2.65337	19.8696	8.65897	b4115, b0452, b3927	ARGAGMt7pp, FACOAE100, FACOAE120, FACOAE140, FACOAE141, FACOAE160, FACOAE161, FACOAE180, FACOAE181, FACOAE60, FACOAE80, GLYALDtpp, GLYtpp, UREAtpp
7868	-49.6909	EX_succ_e	7.47746	-7.5	0.28624	3	25.8761	-11.7704	-2.65346	19.8703	8.65919	b3844, b2663, b0221	ABUTt2pp, ACOAD1f, ACOAD2f, ACOAD3f, ACOAD4f, ACOAD5f, ACOAD6f, ACOAD7f, ACOAD8f, FADRx, FE3Ri, FLVRx
7869	-49.6909	EX_succ_e	7.47746	-7.5	0.28624	3	25.8761	-11.7704	-2.65346	19.8703	8.65919	b2836, b3844, b2903	2AGPEAT120, 2AGPEAT140, 2AGPEAT141, 2AGPEAT160, 2AGPEAT161, 2AGPEAT180, 2AGPEAT181, 2AGPGAT120, 2AGPGAT140, 2AGPGAT141, 2AGPGAT160, 2AGPGAT161, 2AGPGAT180, 2AGPGAT181, AACPS1, AACPS2, AACPS3, AACPS4, AACPS5, AACPS6, AACPS7, AACPS8, AACPS9, FADRx, FE3Ri, FLVRx, GLYCL
7870	-49.69	EX_succ_e	7.47723	-7.5	0.28624	3	25.8752	-11.7704	-2.65337	19.8696	8.65897	b3503, b1380, b0221	ACOAD1f, ACOAD2f, ACOAD3f, ACOAD4f, ACOAD5f, ACOAD6f, ACOAD7f, ACOAD8f, ASR, LDH_D
7871	-49.69	EX_succ_e	7.47723	-7.5	0.28624	3	25.8752	-11.7704	-2.65337	19.8696	8.65897	b2663, b0221, b0009	ABUTt2pp, ACOAD1f, ACOAD2f, ACOAD3f, ACOAD4f, ACOAD5f, ACOAD6f, ACOAD7f, ACOAD8f, MPTAT
7872	-49.6825	EX_succ_e	7.42655	-7.5	0.290955	2	25.7653	-11.7657	-2.63547	19.7376	8.66317	b3844, b4117	ARGDC, FADRx, FE3Ri, FLVRx
7873	-49.6813	EX_succ_e	7.42689	-7.5	0.29095	2	25.7665	-11.7704	-2.6356	19.7387	8.66344	b3844, b0003	4HTHRK, FADRx, FE3Ri, FLVRx, HSK
7874	-49.6801	EX_succ_e	7.42655	-7.5	0.290955	2	25.7653	-11.7704	-2.63547	19.7376	8.66317	b3844, b0032	CBPS, FADRx, FE3Ri, FLVRx
7875	-49.6801	EX_succ_e	7.42655	-7.5	0.290955	2	25.7653	-11.7704	-2.63547	19.7376	8.66317	b3844, b0033	CBPS, FADRx, FE3Ri, FLVRx
7876	-49.6801	EX_succ_e	7.42655	-7.5	0.290955	2	25.7653	-11.7704	-2.63547	19.7376	8.66317	b3844, b2903	FADRx, FE3Ri, FLVRx, GLYCL
7877	-49.6801	EX_succ_e	7.42655	-7.5	0.290955	2	25.7653	-11.7704	-2.63547	19.7376	8.66317	b3844, b2905	FADRx, FE3Ri, FLVRx, GLYCL
7878	-49.6801	EX_succ_e	7.42655	-7.5	0.290955	2	25.7653	-11.7704	-2.63547	19.7376	8.66317	b3844, b0662	FADRx, FE3Ri, FLVRx, OMMBLHXy
7879	-49.6801	EX_succ_e	7.42655	-7.5	0.290955	2	25.7653	-11.7704	-2.63547	19.7376	8.66317	b3844, b2264	FADRx, FE3Ri, FLVRx, SEPHCHCS
7880	-49.6801	EX_succ_e	7.42655	-7.5	0.290955	2	25.7653	-11.7704	-2.63547	19.7376	8.66317	b3831, b3844	FADRx, FE3Ri, FLVRx, PYNP2r
7881	-49.6801	EX_succ_e	7.42655	-7.5	0.290955	2	25.7653	-11.7704	-2.63547	19.7376	8.66317	b3844, b0516	ALLTAMH2, FADRx, FE3Ri, FLVRx
7882	-49.6801	EX_succ_e	7.42655	-7.5	0.290955	2	25.7653	-11.7704	-2.63547	19.7376	8.66317	b3844, b4119	FADRx, FE3Ri, FLVRx, GALS3
7883	-49.6801	EX_succ_e	7.42655	-7.5	0.290955	2	25.7653	-11.7704	-2.63547	19.7376	8.66317	b3844, b2700	FADRx, FE3Ri, FLVRx, NMNDA
7884	-49.6801	EX_succ_e	7.42655	-7.5	0.290955	2	25.7653	-11.7704	-2.63547	19.7376	8.66317	b3844, b4367	FADRx, FE3Ri, FEOXAMR1, FEOXAMR2, FEOXAMR3, FLVRx
7885	-49.6801	EX_succ_e	7.42655	-7.5	0.290955	2	25.7653	-11.7704	-2.63547	19.7376	8.66317	b3844, b1014	FADRx, FE3Ri, FLVRx, P5CD, PROD3
7886	-49.6801	EX_succ_e	7.42655	-7.5	0.290955	2	25.7653	-11.7704	-2.63547	19.7376	8.66317	b3844, b1528	ARBt3ipp, FADRx, FE3Ri, FLVRx, MELIBt3ipp
7887	-49.6801	EX_succ_e	7.42655	-7.5	0.290955	2	25.7653	-11.7704	-2.63547	19.7376	8.66317	b2221, b3844	BUTCT, FADRx, FE3Ri, FLVRx, HXCT
7888	-49.6801	EX_succ_e	7.42655	-7.5	0.290955	2	25.7653	-11.7704	-2.63547	19.7376	8.66317	b3844, b3792	ECAtpp, FADRx, FE3Ri, FLVRx
7889	-49.6801	EX_succ_e	7.42655	-7.5	0.290955	2	25.7653	-11.7704	-2.63547	19.7376	8.66317	b3844, b3790	FADRx, FE3Ri, FLVRx, TDPADGAT
7890	-49.6801	EX_succ_e	7.42655	-7.5	0.290955	2	25.7653	-11.7704	-2.63547	19.7376	8.66317	b3844, b3787	FADRx, FE3Ri, FLVRx, UACMAMO
7891	-49.6801	EX_succ_e	7.42655	-7.5	0.290955	2	25.7653	-11.7704	-2.63547	19.7376	8.66317	b2599, b3844	FADRx, FE3Ri, FLVRx, PPNDH
7892	-49.6801	EX_succ_e	7.42655	-7.5	0.290955	2	25.7653	-11.7704	-2.63547	19.7376	8.66317	b3844, b2428	ACM6PH, FADRx, FE3Ri, FLVRx
7893	-49.6801	EX_succ_e	7.42655	-7.5	0.290955	2	25.7653	-11.7704	-2.63547	19.7376	8.66317	b3844, b1119	ACGAMK, FADRx, FE3Ri, FLVRx
7894	-49.6801	EX_succ_e	7.42655	-7.5	0.290955	2	25.7653	-11.7704	-2.63547	19.7376	8.66317	b3844, b4094	FADRx, FE3Ri, FLVRx, R15BPK
7895	-49.6801	EX_succ_e	7.42655	-7.5	0.290955	2	25.7653	-11.7704	-2.63547	19.7376	8.66317	b3844, b2130	CHLabcpp, FADRx, FE3Ri, FLVRx
7896	-49.6801	EX_succ_e	7.42655	-7.5	0.290955	2	25.7653	-11.7704	-2.63547	19.7376	8.66317	b3844, b0511	ALLTNt2rpp, FADRx, FE3Ri, FLVRx
7897	-49.6801	EX_succ_e	7.42655	-7.5	0.290955	2	25.7653	-11.7704	-2.63547	19.7376	8.66317	b0222, b3844	FADRx, FE3Ri, FLVRx, S7PI
7898	-49.6801	EX_succ_e	7.42655	-7.5	0.290955	2	25.7653	-11.7704	-2.63547	19.7376	8.66317	b3844, b2200	FADRx, FE3Ri, FLVRx, PHEMEabcpp
7899	-49.6801	EX_succ_e	7.42655	-7.5	0.290955	2	25.7653	-11.7704	-2.63547	19.7376	8.66317	b3844, b0729	FADRx, FE3Ri, FLVRx, SUCOAS
7900	-49.6801	EX_succ_e	7.42655	-7.5	0.290955	2	25.7653	-11.7704	-2.63547	19.7376	8.66317	b3073, b3844	FADRx, FE3Ri, FLVRx, PTRCTA
7901	-49.6801	EX_succ_e	7.42655	-7.5	0.290955	2	25.7653	-11.7704	-2.63547	19.7376	8.66317	b3844, b2938	ARGDCpp, FADRx, FE3Ri, FLVRx
7902	-49.6801	EX_succ_e	7.42655	-7.5	0.290955	2	25.7653	-11.7704	-2.63547	19.7376	8.66317	b3844, b2943	FADRx, FE3Ri, FLVRx, GALt2pp, GLCt2pp
7903	-49.6801	EX_succ_e	7.42655	-7.5	0.290955	2	25.7653	-11.7704	-2.63547	19.7376	8.66317	b3844, b3460	ALAabcpp, FADRx, FE3Ri, FLVRx, ILEabcpp, THRabcpp, VALabcpp
7904	-49.6801	EX_succ_e	7.42655	-7.5	0.290955	2	25.7653	-11.7704	-2.63547	19.7376	8.66317	b1398, b3844	FADRx, FE3Ri, FLVRx, PACCOAL
7905	-49.6801	EX_succ_e	7.42655	-7.5	0.290955	2	25.7653	-11.7704	-2.63547	19.7376	8.66317	b3844, b0724	FADRx, FE3Ri, FLVRx, SUCDi
7906	-49.6801	EX_succ_e	7.42655	-7.5	0.290955	2	25.7653	-11.7704	-2.63547	19.7376	8.66317	b3844, b2866	FADRx, FE3Ri, FLVRx, HXAND, XAND
7907	-49.6801	EX_succ_e	7.42655	-7.5	0.290955	2	25.7653	-11.7704	-2.63547	19.7376	8.66317	b3844, b1387	FADRx, FE3Ri, FLVRx, OXCOAHDH
7908	-49.6801	EX_succ_e	7.42655	-7.5	0.290955	2	25.7653	-11.7704	-2.63547	19.7376	8.66317	b3844, b1395	FADRx, FE3Ri, FLVRx, HADPCOADH3
7909	-49.6801	EX_succ_e	7.42655	-7.5	0.290955	2	25.7653	-11.7704	-2.63547	19.7376	8.66317	b3844, b4115	ARGAGMt7pp, FADRx, FE3Ri, FLVRx
7910	-49.6801	EX_succ_e	7.42655	-7.5	0.290955	2	25.7653	-11.7704	-2.63547	19.7376	8.66317	b0871, b3844	FADRx, FE3Ri, FLVRx, POX
7911	-49.6801	EX_succ_e	7.42655	-7.5	0.290955	2	25.7653	-11.7704	-2.63547	19.7376	8.66317	b3844, b2210	FADRx, FE3Ri, FLVRx, MDH2, MDH3
7912	-49.6801	EX_succ_e	7.42655	-7.5	0.290955	2	25.7653	-11.7704	-2.63547	19.7376	8.66317	b3844, b0430	CYTBO3_4pp, FADRx, FE3Ri, FLVRx
7913	-49.6801	EX_succ_e	7.42655	-7.5	0.290955	2	25.7653	-11.7704	-2.63547	19.7376	8.66317	b3844, b0429	CYTBO3_4pp, FADRx, FE3Ri, FLVRx
7914	-49.6801	EX_succ_e	7.42655	-7.5	0.290955	2	25.7653	-11.7704	-2.63547	19.7376	8.66317	b3844, b3528	ASPt2_2pp, FADRx, FE3Ri, FLVRx, FUMt2_2pp, MALDt2_2pp, MALt2_2pp, OROTt2_2pp
7915	-49.6801	EX_succ_e	7.42655	-7.5	0.290955	2	25.7653	-11.7704	-2.63547	19.7376	8.66317	b3844, b1533	FADRx, FE3Ri, FLVRx, SERtpp
7916	-49.6801	EX_succ_e	7.42655	-7.5	0.290955	2	25.7653	-11.7704	-2.63547	19.7376	8.66317	b3844, b4238	FADRx, FE3Ri, FLVRx, RNTR1c2, RNTR2c2, RNTR3c2, RNTR4c2
7917	-49.6801	EX_succ_e	7.42655	-7.5	0.290955	2	25.7653	-11.7704	-2.63547	19.7376	8.66317	b3844, b1516	AI2abcpp, FADRx, FE3Ri, FLVRx
7918	-49.6801	EX_succ_e	7.42655	-7.5	0.290955	2	25.7653	-11.7704	-2.63547	19.7376	8.66317	b3844, b1192	4PCP, AGM4PCP, AM4PCP, FADRx, FE3Ri, FLVRx, UM4PCP
7919	-49.6801	EX_succ_e	7.42655	-7.5	0.290955	2	25.7653	-11.7704	-2.63547	19.7376	8.66317	b3844, b0151	ARBTNabcpp, CPGNabcpp, FADRx, FE3HOXabcpp, FE3Ri, FECRMabcpp, FEOXAMabcpp, FLVRx
7920	-49.6801	EX_succ_e	7.42655	-7.5	0.290955	2	25.7653	-11.7704	-2.63547	19.7376	8.66317	b3844, b1238	DURIK1, FADRx, FE3Ri, FLVRx, TMDK1
7921	-49.6801	EX_succ_e	7.42655	-7.5	0.290955	2	25.7653	-11.7704	-2.63547	19.7376	8.66317	b3844, b1012	FADRx, FE3Ri, FLVRx, PYROX
7922	-49.6801	EX_succ_e	7.42655	-7.5	0.290955	2	25.7653	-11.7704	-2.63547	19.7376	8.66317	b3844, b3927	FADRx, FE3Ri, FLVRx, GLYALDtpp, GLYtpp, UREAtpp
7923	-49.6801	EX_succ_e	7.42655	-7.5	0.290955	2	25.7653	-11.7704	-2.63547	19.7376	8.66317	b3844, b2149	FADRx, FE3Ri, FLVRx, GLCabcpp
7924	-49.6801	EX_succ_e	7.42655	-7.5	0.290955	2	25.7653	-11.7704	-2.63547	19.7376	8.66317	b3844, b0594	DHBS, FADRx, FE3Ri, FLVRx
7925	-49.6801	EX_succ_e	7.42655	-7.5	0.290955	2	25.7653	-11.7704	-2.63547	19.7376	8.66317	b3844, b0583	ENTCS, FADRx, FE3Ri, FLVRx
7926	-49.6801	EX_succ_e	7.42655	-7.5	0.290955	2	25.7653	-11.7704	-2.63547	19.7376	8.66317	b3844, b0757	FADRx, FE3Ri, FLVRx, GALKr
7927	-49.6801	EX_succ_e	7.42655	-7.5	0.290955	2	25.7653	-11.7704	-2.63547	19.7376	8.66317	b3844, b0758	FADRx, FE3Ri, FLVRx, UGLT
7928	-49.6801	EX_succ_e	7.42655	-7.5	0.290955	2	25.7653	-11.7704	-2.63547	19.7376	8.66317	b3844, b3457	ALAabcpp, FADRx, FE3Ri, FLVRx, ILEabcpp, LEUabcpp, THRabcpp, VALabcpp
7929	-49.6801	EX_succ_e	7.42655	-7.5	0.290955	2	25.7653	-11.7704	-2.63547	19.7376	8.66317	b3844, b3456	ALAabcpp, FADRx, FE3Ri, FLVRx, ILEabcpp, LEUabcpp, THRabcpp, VALabcpp
7930	-49.6801	EX_succ_e	7.42655	-7.5	0.290955	2	25.7653	-11.7704	-2.63547	19.7376	8.66317	b3844, b2308	FADRx, FE3Ri, FLVRx, HISabcpp, LYSabcpp, ORNabcpp
7931	-49.6801	EX_succ_e	7.42655	-7.5	0.290955	2	25.7653	-11.7704	-2.63547	19.7376	8.66317	b3844, b0312	BETALDHx, BETALDHy, FADRx, FE3Ri, FLVRx
7932	-49.6801	EX_succ_e	7.42655	-7.5	0.290955	2	25.7653	-11.7704	-2.63547	19.7376	8.66317	b3844, b0592	DHBSZ3FEabcpp, FADRx, FE3Ri, FEENTERabcpp, FLVRx
7933	-49.6801	EX_succ_e	7.42655	-7.5	0.290955	2	25.7653	-11.7704	-2.63547	19.7376	8.66317	b3844, b0588	DHBSZ3FEabcpp, FADRx, FE3Ri, FEENTERabcpp, FLVRx
7934	-49.6801	EX_succ_e	7.42655	-7.5	0.290955	2	25.7653	-11.7704	-2.63547	19.7376	8.66317	b3844, b0591	FADRx, FE3Ri, FEENTERtpp, FLVRx
7935	-49.6801	EX_succ_e	7.42655	-7.5	0.290955	2	25.7653	-11.7704	-2.63547	19.7376	8.66317	b3844, b3779	FADRx, FE3Ri, FLVRx, GTPDPDP
7936	-49.6801	EX_succ_e	7.42655	-7.5	0.290955	2	25.7653	-11.7704	-2.63547	19.7376	8.66317	b3844, b2889	FADRx, FE3Ri, FLVRx, IPDDI
7937	-49.6801	EX_succ_e	7.42655	-7.5	0.290955	2	25.7653	-11.7704	-2.63547	19.7376	8.66317	b3844, b0150	FADRx, FE3HOXtonex, FE3Ri, FECRMtonex, FEOXAMtonex, FLVRx
7938	-49.6801	EX_succ_e	7.42655	-7.5	0.290955	2	25.7653	-11.7704	-2.63547	19.7376	8.66317	b3844, b1326	FADRx, FE3Ri, FLVRx, LADGMDH
7939	-49.6801	EX_succ_e	7.42655	-7.5	0.290955	2	25.7653	-11.7704	-2.63547	19.7376	8.66317	b3788, b3844	FADRx, FE3Ri, FLVRx
7940	-49.6801	EX_succ_e	7.42655	-7.5	0.290955	2	25.7653	-11.7704	-2.63547	19.7376	8.66317	b3844, b1329	FADRx, FE3Ri, FLVRx
7941	-49.6801	EX_succ_e	7.42655	-7.5	0.290955	2	25.7653	-11.7704	-2.63547	19.7376	8.66317	b3003, b3844	FADRx, FE3Ri, FLVRx
7942	-49.6801	EX_succ_e	7.42655	-7.5	0.290955	2	25.7653	-11.7704	-2.63547	19.7376	8.66317	b3844, b1330	FADRx, FE3Ri, FLVRx
7943	-49.6801	EX_succ_e	7.42655	-7.5	0.290955	2	25.7653	-11.7704	-2.63547	19.7376	8.66317	b3844, b3714	FADRx, FE3Ri, FLVRx
7944	-49.6801	EX_succ_e	7.42655	-7.5	0.290955	2	25.7653	-11.7704	-2.63547	19.7376	8.66317	b3844, b2817	FADRx, FE3Ri, FLVRx
7945	-49.6801	EX_succ_e	7.42655	-7.5	0.290955	2	25.7653	-11.7704	-2.63547	19.7376	8.66317	b3844, b2162	FADRx, FE3Ri, FLVRx
7946	-49.6801	EX_succ_e	7.42655	-7.5	0.290955	2	25.7653	-11.7704	-2.63547	19.7376	8.66317	b3844, b3877	DHPStr, FADRx, FE3Ri, FLVRx
7947	-49.6801	EX_succ_e	7.42655	-7.5	0.290955	2	25.7653	-11.7704	-2.63547	19.7376	8.66317	b3844, b0273	FADRx, FE3Ri, FLVRx
7948	-49.6801	EX_succ_e	7.42655	-7.5	0.290955	2	25.7653	-11.7704	-2.63547	19.7376	8.66317	b3844, b0124	FADRx, FE3Ri, FLVRx
7949	-49.6801	EX_succ_e	7.42655	-7.5	0.290955	2	25.7653	-11.7704	-2.63547	19.7376	8.66317	b3844, b1291	FADRx, FE3Ri, FLVRx
7950	-49.6801	EX_succ_e	7.42655	-7.5	0.290955	2	25.7653	-11.7704	-2.63547	19.7376	8.66317	b3844, b1524	FADRx, FE3Ri, FLVRx
7951	-49.6801	EX_succ_e	7.42655	-7.5	0.290955	2	25.7653	-11.7704	-2.63547	19.7376	8.66317	b3844, b1622	FADRx, FE3Ri, FLVRx
7952	-49.6801	EX_succ_e	7.42655	-7.5	0.290955	2	25.7653	-11.7704	-2.63547	19.7376	8.66317	b2781, b3844	FADRx, FE3Ri, FLVRx
7953	-49.6801	EX_succ_e	7.42655	-7.5	0.290955	2	25.7653	-11.7704	-2.63547	19.7376	8.66317	b3844, b2995	FADRx, FE3Ri, FLVRx
7954	-49.6801	EX_succ_e	7.42655	-7.5	0.290955	2	25.7653	-11.7704	-2.63547	19.7376	8.66317	b3844, b2165	FADRx, FE3Ri, FLVRx, YUMPS
7955	-49.6801	EX_succ_e	7.42655	-7.5	0.290955	2	25.7653	-11.7704	-2.63547	19.7376	8.66317	b3225, b3844	ACNML, FADRx, FE3Ri, FLVRx
7956	-49.6801	EX_succ_e	7.42655	-7.5	0.290955	2	25.7653	-11.7704	-2.63547	19.7376	8.66317	b3693, b3844	DDGALK, FADRx, FE3Ri, FLVRx
7957	-49.6801	EX_succ_e	7.42655	-7.5	0.290955	2	25.7653	-11.7704	-2.63547	19.7376	8.66317	b3844, b2711	FADRx, FE3Ri, FLVRx, NHFRBO
7958	-49.6801	EX_succ_e	7.42655	-7.5	0.290955	2	25.7653	-11.7704	-2.63547	19.7376	8.66317	b3844, b0842	FADRx, FE3Ri, FLVRx
7959	-49.6801	EX_succ_e	7.42655	-7.5	0.290955	2	25.7653	-11.7704	-2.63547	19.7376	8.66317	b3844, b1761	FADRx, FE3Ri, FLVRx
7960	-49.6801	EX_succ_e	7.42655	-7.5	0.290955	2	25.7653	-11.7704	-2.63547	19.7376	8.66317	b0446, b3844	FADRx, FE3Ri, FLVRx
7961	-49.6801	EX_succ_e	7.42655	-7.5	0.290955	2	25.7653	-11.7704	-2.63547	19.7376	8.66317	b3844, b0444	CCGS, FADRx, FE3Ri, FLVRx
7962	-49.6801	EX_succ_e	7.42655	-7.5	0.290955	2	25.7653	-11.7704	-2.63547	19.7376	8.66317	b3844, b0819	FADRx, FE3Ri, FLVRx
7963	-49.6801	EX_succ_e	7.42655	-7.5	0.290955	2	25.7653	-11.7704	-2.63547	19.7376	8.66317	b3844, b1801	FADRx, FE3Ri, FLVRx
7964	-49.6801	EX_succ_e	7.42655	-7.5	0.290955	2	25.7653	-11.7704	-2.63547	19.7376	8.66317	b3844, b0756	FADRx, FE3Ri, FLVRx, GALM2pp
7965	-49.6801	EX_succ_e	7.42655	-7.5	0.290955	2	25.7653	-11.7704	-2.63547	19.7376	8.66317	b3844, b1106	FADRx, FE3Ri, FLVRx, TMK
7966	-49.6801	EX_succ_e	7.42655	-7.5	0.290955	2	25.7653	-11.7704	-2.63547	19.7376	8.66317	b3844, b2578	FADRx, FE3Ri, FLVRx
7967	-49.6801	EX_succ_e	7.42655	-7.5	0.290955	2	25.7653	-11.7704	-2.63547	19.7376	8.66317	b3844, b4173	FADRx, FE3Ri, FLVRx
7968	-49.6801	EX_succ_e	7.42655	-7.5	0.290955	2	25.7653	-11.7704	-2.63547	19.7376	8.66317	b3844, b4192	ASCBPL, FADRx, FE3Ri, FLVRx
7969	-49.6801	EX_succ_e	7.42655	-7.5	0.290955	2	25.7653	-11.7704	-2.63547	19.7376	8.66317	b3844, b0418	FADRx, FE3Ri, FLVRx
7970	-49.6801	EX_succ_e	7.42655	-7.5	0.290955	2	25.7653	-11.7704	-2.63547	19.7376	8.66317	b3844, b4033	14GLUCANabcpp, FADRx, FE3Ri, FLVRx, MALTHXabcpp, MALTPTabcpp, MALTTRabcpp, MALTTTRabcpp, MALTabcpp
7971	-49.6801	EX_succ_e	7.42655	-7.5	0.290955	2	25.7653	-11.7704	-2.63547	19.7376	8.66317	b3952, b3844	FADRx, FE3Ri, FLVRx
7972	-49.6801	EX_succ_e	7.42655	-7.5	0.290955	2	25.7653	-11.7704	-2.63547	19.7376	8.66317	b3844, b1386	42A12BOOXpp, FADRx, FE3Ri, FLVRx, PEAMNOpp, TYROXDApp
7973	-49.6801	EX_succ_e	7.42655	-7.5	0.290955	2	25.7653	-11.7704	-2.63547	19.7376	8.66317	b3844, b1466	FADRx, FE3Ri, FLVRx
7974	-49.6801	EX_succ_e	7.42655	-7.5	0.290955	2	25.7653	-11.7704	-2.63547	19.7376	8.66317	b3844, b3290	FADRx, FE3Ri, FLVRx
7975	-49.6801	EX_succ_e	7.42655	-7.5	0.290955	2	25.7653	-11.7704	-2.63547	19.7376	8.66317	b3844, b3599	FADRx, FE3Ri, FLVRx
7976	-49.6801	EX_succ_e	7.42655	-7.5	0.290955	2	25.7653	-11.7704	-2.63547	19.7376	8.66317	b3844, b0905	FADRx, FE3Ri, FLVRx
7977	-49.6801	EX_succ_e	7.42655	-7.5	0.290955	2	25.7653	-11.7704	-2.63547	19.7376	8.66317	b3844, b0675	FADRx, FE3Ri, FLVRx
7978	-49.6801	EX_succ_e	7.42655	-7.5	0.290955	2	25.7653	-11.7704	-2.63547	19.7376	8.66317	b3844, b3824	FADRx, FE3Ri, FLVRx
7979	-49.6801	EX_succ_e	7.42655	-7.5	0.290955	2	25.7653	-11.7704	-2.63547	19.7376	8.66317	b3844, b3656	FADRx, FE3Ri, FLVRx, XYHDL
7980	-49.6801	EX_succ_e	7.42655	-7.5	0.290955	2	25.7653	-11.7704	-2.63547	19.7376	8.66317	b3844, b4219	FADRx, FE3Ri, FLVRx
7981	-49.6801	EX_succ_e	7.42655	-7.5	0.290955	2	25.7653	-11.7704	-2.63547	19.7376	8.66317	b3844, b4034	14GLUCANabcpp, FADRx, FE3Ri, FLVRx, MALTHXabcpp, MALTPTabcpp, MALTTRabcpp, MALTTTRabcpp, MALTabcpp
7982	-49.6801	EX_succ_e	7.42655	-7.5	0.290955	2	25.7653	-11.7704	-2.63547	19.7376	8.66317	b3844, b0340	CYNTAH, FADRx, FE3Ri, FLVRx
7983	-49.6801	EX_succ_e	7.42655	-7.5	0.290955	2	25.7653	-11.7704	-2.63547	19.7376	8.66317	b3844, b2789	FADRx, FE3Ri, FLVRx
7984	-49.6801	EX_succ_e	7.42655	-7.5	0.290955	2	25.7653	-11.7704	-2.63547	19.7376	8.66317	b3844, b2927	FADRx, FE3Ri, FLVRx
7985	-49.6801	EX_succ_e	7.42655	-7.5	0.290955	2	25.7653	-11.7704	-2.63547	19.7376	8.66317	b3844, b1711	ADOCBLabcpp, CBIuabcpp, CBL1abcpp, FADRx, FE3Ri, FLVRx
7986	-49.6801	EX_succ_e	7.42655	-7.5	0.290955	2	25.7653	-11.7704	-2.63547	19.7376	8.66317	b3844, b2497	FADRx, FE3Ri, FLVRx
7987	-49.6801	EX_succ_e	7.42655	-7.5	0.290955	2	25.7653	-11.7704	-2.63547	19.7376	8.66317	b3844, b1737	CHTBSptspp, FADRx, FE3Ri, FLVRx
7988	-49.6801	EX_succ_e	7.42655	-7.5	0.290955	2	25.7653	-11.7704	-2.63547	19.7376	8.66317	b3844, b2519	FADRx, FE3Ri, FLVRx
7989	-49.6801	EX_succ_e	7.42655	-7.5	0.290955	2	25.7653	-11.7704	-2.63547	19.7376	8.66317	b3844, b2147	DURADx, FADRx, FE3Ri, FLVRx
7990	-49.6801	EX_succ_e	7.42655	-7.5	0.290955	2	25.7653	-11.7704	-2.63547	19.7376	8.66317	b3844, b1535	FADRx, FE3Ri, FLVRx
7991	-49.6801	EX_succ_e	7.42655	-7.5	0.290955	2	25.7653	-11.7704	-2.63547	19.7376	8.66317	b3844, b2601	FADRx, FE3Ri, FLVRx
7992	-49.6801	EX_succ_e	7.42655	-7.5	0.290955	2	25.7653	-11.7704	-2.63547	19.7376	8.66317	b3844, b4130	FADRx, FE3Ri, FLVRx
7993	-49.6801	EX_succ_e	7.42655	-7.5	0.290955	2	25.7653	-11.7704	-2.63547	19.7376	8.66317	b3844, b1981	FADRx, FE3Ri, FLVRx, SKMt2pp
7994	-49.6801	EX_succ_e	7.42655	-7.5	0.290955	2	25.7653	-11.7704	-2.63547	19.7376	8.66317	b3844, b2523	FADRx, FE3Ri, FLVRx
7995	-49.6801	EX_succ_e	7.42655	-7.5	0.290955	2	25.7653	-11.7704	-2.63547	19.7376	8.66317	b3844, b0874	FADRx, FE3Ri, FLVRx
7996	-49.6801	EX_succ_e	7.42655	-7.5	0.290955	2	25.7653	-11.7704	-2.63547	19.7376	8.66317	b3844, b0783	CPMPS, FADRx, FE3Ri, FLVRx
7997	-49.6801	EX_succ_e	7.42655	-7.5	0.290955	2	25.7653	-11.7704	-2.63547	19.7376	8.66317	b3844, b0624	FADRx, FE3Ri, FLVRx, Ftpp
7998	-49.6801	EX_succ_e	7.42655	-7.5	0.290955	2	25.7653	-11.7704	-2.63547	19.7376	8.66317	b3844, b1584	FADRx, FE3Ri, FLVRx, SPMDAT1, SPMDAT2
7999	-49.6801	EX_succ_e	7.42655	-7.5	0.290955	2	25.7653	-11.7704	-2.63547	19.7376	8.66317	b3844, b0932	FADRx, FE3Ri, FLVRx
8000	-49.6801	EX_succ_e	7.42655	-7.5	0.290955	2	25.7653	-11.7704	-2.63547	19.7376	8.66317	b3844, b2843	FADRx, FE3Ri, FLVRx, KDUI

## Sheet: Removed reaction duplicates
Rank	Fitness Score	Product	Product flux (mmol/gDW/h	Substrate flux (mmol/gDW/h2	Maximal growth rate (1/h)	Nr of deletions	Minimal ISS at max growth (1e-4 USD/gDW/h)	Minimal ISS at 0 growth (1e-4 USD/gDW/h)	Environmental SI at max growth (1e-4 USD/gDW/h)	Economic SI at max growth (1e-4 USD/gDW/h)	Social SI at max growth (1e-4 USD/gDW/h)	Gene deletions	Deleted reactions
7600	-57.8484	EX_succ_e	7.96585	-7.5	0.164791	7	33.8952	-10.6936	-2.84279	26.9332	9.80486	b1264, b3844, b2049, b0010, b0653, b1533, b1380	ACt2rpp, ANS, ASPabcpp, FADRx, FE3Ri, FLVRx, GLUabcpp, LDH_D, MAN1PT2, SERtpp
7601	-57.8484	EX_succ_e	7.96585	-7.5	0.164791	7	33.8952	-10.6936	-2.84279	26.9332	9.80486	b0077, b3844, b0010, b4115, b4120, b1380, b4233	ACt2rpp, ARGAGMt7pp, FADRx, FE3Ri, FLVRx, LDH_D, UM3PL, UM4PL
7603	-57.8484	EX_succ_e	7.96585	-7.5	0.164791	7	33.8952	-10.6936	-2.84279	26.9332	9.80486	b3844, b2210, b0010, b4115, b2679, b1380, b3930	ACt2rpp, ARGAGMt7pp, CRNDabcpp, CRNabcpp, CTBTabcpp, DHNAOT4, FADRx, FE3Ri, FLVRx, LDH_D, MDH2, MDH3, PROabcpp
7604	-57.8484	EX_succ_e	7.96585	-7.5	0.164791	7	33.8952	-10.6936	-2.84279	26.9332	9.80486	b3844, b0010, b4115, b0979, b3502, b1380, b2906	ACt2rpp, ARGAGMt7pp, ASO3t8pp, CYTBD2pp, FADRx, FE3Ri, FLVRx, LDH_D, OPHHXy
7605	-57.8484	EX_succ_e	7.96585	-7.5	0.164791	7	33.8952	-10.6936	-2.84279	26.9332	9.80486	b3844, b2210, b0010, b3603, b2303, b1380, b3930	ACt2rpp, DHNAOT4, DHPTPE, FADRx, FE3Ri, FLVRx, LDH_D, MDH2, MDH3
7606	-57.8484	EX_succ_e	7.96585	-7.5	0.164791	7	33.8952	-10.6936	-2.84279	26.9332	9.80486	b3844, b0121, b0010, b4115, b2148, b1380, b1686	ACt2rpp, APCS, ARGAGMt7pp, DHNCOAT, FADRx, FE3Ri, FLVRx, GLCabcpp, LDH_D, SPMS
7607	-57.8484	EX_succ_e	7.96585	-7.5	0.164791	7	33.8952	-10.6936	-2.84279	26.9332	9.80486	b3844, b2210, b0010, b1380, b1798, b4101, b1400	2HPTCOAT, ACt2rpp, ARMEPNS, FADRx, FE3Ri, FLVRx, LDH_D, MDH2, MDH3
7608	-57.8484	EX_succ_e	7.96585	-7.5	0.164791	7	33.8952	-10.6936	-2.84279	26.9332	9.80486	b2930, b3844, b0010, b4115, b4464, b2131, b1380	ACt2rpp, ARGAGMt7pp, CHLabcpp, FADRx, FE3Ri, FLVRx, LDH_D
7609	-57.8484	EX_succ_e	7.96585	-7.5	0.164791	7	33.8952	-10.6936	-2.84279	26.9332	9.80486	b3844, b2048, b0010, b1380, b3542, b0543, b1378	ACt2rpp, CGLYabcpp, CHLt3pp, FADRx, FE3Ri, FLVRx, GLYBt3pp, LDH_D, PMANM, POR5, PROGLYabcpp
7610	-57.8484	EX_succ_e	7.96585	-7.5	0.164791	7	33.8952	-10.6936	-2.84279	26.9332	9.80486	b3844, b3526, b3565, b0010, b4115, b0459, b1380	ACt2rpp, ARGAGMt7pp, DDGLK, FADRx, FE3Ri, FLVRx, GLCATr, LDH_D, MALTATr, XYLI1, XYLI2
7611	-57.8484	EX_succ_e	7.96585	-7.5	0.164791	7	33.8952	-10.6936	-2.84279	26.9332	9.80486	b3844, b2690, b0010, b4115, b1246, b1380, b3543	ACt2rpp, ALKP, ARGAGMt7pp, CGLYabcpp, FADRx, FE3Ri, FLVRx, LDH_D, PROGLYabcpp
7612	-57.8484	EX_succ_e	7.96585	-7.5	0.164791	7	33.8952	-10.6936	-2.84279	26.9332	9.80486	b3844, b0010, b4115, b1064, b3006, b2919, b1380	ACt2rpp, ADOCBLtonex, ARGAGMt7pp, ASR, CBItonex, CBL1tonex, CPGNtonex, FADRx, FE3DCITtonex, FE3DHBZStonex, FE3HOXtonex, FE3Ri, FECRMtonex, FEENTERtonex, FEOXAMtonex, FLVRx, LDH_D, MMCD
7613	-57.8484	EX_succ_e	7.96585	-7.5	0.164791	7	33.8952	-10.6936	-2.84279	26.9332	9.80486	b3426, b3844, b0010, b4115, b3409, b1380, b2480	ACt2rpp, ARGAGMt7pp, FADRx, FE2abcpp, FE3Ri, FLVRx, LDH_D
7614	-57.8484	EX_succ_e	7.96585	-7.5	0.164791	7	33.8952	-10.6936	-2.84279	26.9332	9.80486	b3693, b3844, b0010, b4115, b0755, b1380, b3208	ACt2rpp, ARGAGMt7pp, DDGALK, FADRx, FE3Ri, FLVRx, LDH_D
7615	-57.8484	EX_succ_e	7.96585	-7.5	0.164791	7	33.8952	-10.6936	-2.84279	26.9332	9.80486	b3844, b1656, b0010, b4115, b4090, b1380, b3496	ACt2rpp, ALLPI, ARGAGMt7pp, FADRx, FE3Ri, FLVRx, LDH_D
7616	-57.8484	EX_succ_e	7.96585	-7.5	0.164791	7	33.8952	-10.6936	-2.84279	26.9332	9.80486	b1849, b3844, b0312, b0996, b0010, b1380, b4386	ACt2rpp, BETALDHx, BETALDHy, FADRx, FE3Ri, FLVRx, GART, LDH_D, LIPAMPL, LIPATPT, OCTNLL
7617	-57.8484	EX_succ_e	7.96585	-7.5	0.164791	7	33.8952	-10.6936	-2.84279	26.9332	9.80486	b3844, b1200, b0010, b2866, b1991, b1380, b1011	ACt2rpp, DHAPT, FADRx, FE3Ri, FLVRx, HXAND, LDH_D, NNDMBRT, URACPAH, XAND
7618	-57.8484	EX_succ_e	7.96585	-7.5	0.164791	7	33.8952	-10.6936	-2.84279	26.9332	9.80486	b3500, b3844, b2049, b0010, b4115, b2488, b1380	ACt2rpp, ARGAGMt7pp, FADRx, FE3Ri, FLVRx, GTHOr, LDH_D, MAN1PT2
7619	-57.8474	EX_succ_e	7.96585	-7.5	0.164791	5	33.8952	-11.0958	-2.84279	26.9332	9.80486	b1702, b2026, b3583, b0010, b1380	ACt2rpp, LDH_D, PPS, PRAMPC, PRATPP
7620	-57.8474	EX_succ_e	7.96585	-7.5	0.164791	5	33.8952	-11.0958	-2.84279	26.9332	9.80486	b4322, b0010, b0973, b1606, b1380	ACt2rpp, DHMPTR, LDH_D, MNNH
7621	-57.8474	EX_succ_e	7.96585	-7.5	0.164791	5	33.8952	-11.0958	-2.84279	26.9332	9.80486	b1849, b0312, b0996, b0010, b1380	ACt2rpp, BETALDHx, BETALDHy, GART, LDH_D
7622	-57.8474	EX_succ_e	7.96585	-7.5	0.164791	5	33.8952	-11.0958	-2.84279	26.9332	9.80486	b0902, b0010, b4115, b2947, b1380	ACt2rpp, ARGAGMt7pp, GTHS, LDH_D, OBTFL
7623	-57.8474	EX_succ_e	7.96585	-7.5	0.164791	5	33.8952	-11.0958	-2.84279	26.9332	9.80486	b2518, b1748, b0010, b2702, b1380	ACt2rpp, LDH_D, SBTptspp, SOTA
7624	-57.8474	EX_succ_e	7.96585	-7.5	0.164791	5	33.8952	-11.0958	-2.84279	26.9332	9.80486	b0010, b3450, b1380, b3881, b0462	6D6SPA, ACt2rpp, G3PCabcpp, G3PEabcpp, G3PGabcpp, G3PIabcpp, G3PSabcpp, GLYC2Pabcpp, GLYC3Pabcpp, LDH_D
7625	-57.8474	EX_succ_e	7.96585	-7.5	0.164791	5	33.8952	-11.0958	-2.84279	26.9332	9.80486	b0010, b2719, b3451, b2927, b1380	ACt2rpp, G3PCabcpp, G3PEabcpp, G3PGabcpp, G3PIabcpp, G3PSabcpp, GLYC2Pabcpp, GLYC3Pabcpp, LDH_D
7626	-57.8474	EX_succ_e	7.96585	-7.5	0.164791	5	33.8952	-11.0958	-2.84279	26.9332	9.80486	b2901, b3416, b0010, b3127, b1380	ACt2rpp, AMALT1, AMALT2, AMALT3, AMALT4, LDH_D
7627	-57.8474	EX_succ_e	7.96585	-7.5	0.164791	5	33.8952	-11.0958	-2.84279	26.9332	9.80486	b0010, b0592, b3599, b3625, b1380	ACt2rpp, DHBSZ3FEabcpp, FEENTERabcpp, HEPK2, LDH_D
7628	-57.8474	EX_succ_e	7.96585	-7.5	0.164791	5	33.8952	-11.0958	-2.84279	26.9332	9.80486	b0010, b0621, b1380, b2497, b0832	ACt2rpp, GTHRDabcpp, LDH_D
7629	-57.8474	EX_succ_e	7.96585	-7.5	0.164791	5	33.8952	-11.0958	-2.84279	26.9332	9.80486	b0010, b3456, b1380, b0355, b2842	ACt2rpp, ALAabcpp, ILEabcpp, LDH_D, LEUabcpp, THRabcpp, VALabcpp
7630	-57.8474	EX_succ_e	7.96585	-7.5	0.164791	5	33.8952	-11.0958	-2.84279	26.9332	9.80486	b4322, b0010, b4115, b1606, b1380	ACt2rpp, ARGAGMt7pp, DHMPTR, LDH_D, MNNH
7631	-57.8474	EX_succ_e	7.96585	-7.5	0.164791	5	33.8952	-11.0958	-2.84279	26.9332	9.80486	b0010, b4115, b1064, b3006, b1380	ACt2rpp, ADOCBLtonex, ARGAGMt7pp, ASR, CBItonex, CBL1tonex, CPGNtonex, FE3DCITtonex, FE3DHBZStonex, FE3HOXtonex, FECRMtonex, FEENTERtonex, FEOXAMtonex, LDH_D
7632	-57.8474	EX_succ_e	7.96585	-7.5	0.164791	5	33.8952	-11.0958	-2.84279	26.9332	9.80486	b2502, b0675, b0010, b1606, b1380	ACt2rpp, DHMPTR, LDH_D
7633	-57.8474	EX_succ_e	7.96585	-7.5	0.164791	5	33.8952	-11.0958	-2.84279	26.9332	9.80486	b1805, b0010, b0849, b2996, b1380	ACt2rpp, LDH_D
7634	-57.8474	EX_succ_e	7.96585	-7.5	0.164791	5	33.8952	-11.0958	-2.84279	26.9332	9.80486	b2582, b0010, b0622, b1380, b3857	ACt2rpp, BMOGDS1, BMOGDS2, BWCOGDS1, BWCOGDS2, LDH_D, LIPAHT2ex, LIPAHTex, MOGDS
7635	-57.8474	EX_succ_e	7.96585	-7.5	0.164791	5	33.8952	-11.0958	-2.84279	26.9332	9.80486	b0010, b3849, b4544, b1380, b2166	ACt2rpp, LDH_D, PSURIK, ULA4Ntppi
7637	-57.8474	EX_succ_e	7.96585	-7.5	0.164791	5	33.8952	-11.0958	-2.84279	26.9332	9.80486	b3885, b0010, b2927, b1380, b3240	4HBZt3pp, ACt2rpp, LDH_D
7638	-57.8474	EX_succ_e	7.96585	-7.5	0.164791	5	33.8952	-11.0958	-2.84279	26.9332	9.80486	b0010, b4367, b1380, b2175, b2503	4PCPpp, ACt2rpp, AGM4PCPpp, FEOXAMR1, FEOXAMR2, FEOXAMR3, LDH_D
7639	-57.8474	EX_succ_e	7.96585	-7.5	0.164791	5	33.8952	-11.0958	-2.84279	26.9332	9.80486	b0010, b4291, b1380, b0594, b1430	ACt2rpp, DHBS, FE3DCITtonex, LDH_D, TEO2M
7640	-57.8474	EX_succ_e	7.96585	-7.5	0.164791	5	33.8952	-11.0958	-2.84279	26.9332	9.80486	b2388, b0010, b2035, b1380, b3656	ACt2rpp, HEX1, LDH_D, O16AP1pp, O16AP2pp, O16AP3pp, XYHDL
7641	-57.8474	EX_succ_e	7.96585	-7.5	0.164791	5	33.8952	-11.0958	-2.84279	26.9332	9.80486	b0010, b4115, b1124, b1380, b1601	ACt2rpp, AI2tpp, ARGAGMt7pp, LDH_D
7642	-57.8474	EX_succ_e	7.96585	-7.5	0.164791	5	33.8952	-11.0958	-2.84279	26.9332	9.80486	b2053, b0010, b4115, b1380, b0827	ACt2rpp, ARGAGMt7pp, BMOCOS, BWCOS, GMAND, LDH_D, MOCOS, WCOS
7643	-57.8474	EX_succ_e	7.96585	-7.5	0.164791	5	33.8952	-11.0958	-2.84279	26.9332	9.80486	b1636, b0010, b4115, b2490, b1380	ACt2rpp, ARGAGMt7pp, LDH_D
7645	-57.8474	EX_succ_e	7.96585	-7.5	0.164791	5	33.8952	-11.0958	-2.84279	26.9332	9.80486	b0010, b4115, b1440, b1380, b2093	ACt2rpp, ARGAGMt7pp, GALTptspp, LDH_D
7647	-57.8474	EX_succ_e	7.96585	-7.5	0.164791	5	33.8952	-11.0958	-2.84279	26.9332	9.80486	b0010, b4115, b1440, b1380, b2245	ACt2rpp, ARGAGMt7pp, LDH_D, LKDRA
7650	-57.8474	EX_succ_e	7.96585	-7.5	0.164791	5	33.8952	-11.0958	-2.84279	26.9332	9.80486	b0010, b1101, b4115, b4033, b1380	14GLUCANabcpp, ACt2rpp, ARGAGMt7pp, LDH_D, MALTHXabcpp, MALTPTabcpp, MALTTRabcpp, MALTTTRabcpp, MALTabcpp
7651	-57.8474	EX_succ_e	7.96585	-7.5	0.164791	5	33.8952	-11.0958	-2.84279	26.9332	9.80486	b0010, b4115, b0573, b1440, b1380	ACt2rpp, AGt3, ARGAGMt7pp, CUt3, LDH_D
7652	-57.8474	EX_succ_e	7.96585	-7.5	0.164791	5	33.8952	-11.0958	-2.84279	26.9332	9.80486	b2036, b0010, b4291, b1380, b4233	ACt2rpp, FE3DCITtonex, LDH_D, UDPGALM, UM3PL, UM4PL
7653	-57.8474	EX_succ_e	7.96585	-7.5	0.164791	5	33.8952	-11.0958	-2.84279	26.9332	9.80486	b3600, b0010, b1901, b0854, b1380	ACt2rpp, ARBabcpp, LDH_D, M1PD
7654	-57.8474	EX_succ_e	7.96585	-7.5	0.164791	5	33.8952	-11.0958	-2.84279	26.9332	9.80486	b3600, b0010, b4115, b3821, b1380	ACt2rpp, ARGAGMt7pp, LDH_D, M1PD, PLIPA1A120pp, PLIPA1A140pp, PLIPA1A141pp, PLIPA1A160pp, PLIPA1A161pp, PLIPA1A180pp, PLIPA1A181pp, PLIPA1E120pp, PLIPA1E140pp, PLIPA1E141pp, PLIPA1E160pp, PLIPA1E161pp, PLIPA1E180pp, PLIPA1E181pp, PLIPA1G120pp, PLIPA1G140pp, PLIPA1G141pp, PLIPA1G160pp, PLIPA1G161pp, PLIPA1G180pp, PLIPA1G181pp, PLIPA2A120pp, PLIPA2A140pp, PLIPA2A141pp, PLIPA2A160pp, PLIPA2A161pp, P…
7655	-57.8474	EX_succ_e	7.96585	-7.5	0.164791	5	33.8952	-11.0958	-2.84279	26.9332	9.80486	b3430, b0038, b0010, b1216, b1380	ACt2rpp, CA2t3pp, CRNBTCT, CRNCBCT, GLGC, LDH_D
7656	-57.8474	EX_succ_e	7.96585	-7.5	0.164791	5	33.8952	-11.0958	-2.84279	26.9332	9.80486	b1261, b0010, b1246, b1380, b1681	ACt2rpp, LDH_D, S2FE2SR, S2FE2SS, S2FE2SS2, S2FE2ST, S4FE4SR, S4FE4ST, TRPS1, TRPS2, TRPS3
7657	-57.8474	EX_succ_e	7.96585	-7.5	0.164791	5	33.8952	-11.0958	-2.84279	26.9332	9.80486	b2290, b0010, b4287, b1380, b0709	ACt2rpp, FE3DCITabcpp, LDH_D
7658	-57.8474	EX_succ_e	7.96585	-7.5	0.164791	5	33.8952	-11.0958	-2.84279	26.9332	9.80486	b0010, b2239, b0451, b1380, b3893	ACt2rpp, GPDDA1pp, GPDDA2pp, GPDDA3pp, GPDDA4pp, GPDDA5pp, LDH_D
7659	-57.8474	EX_succ_e	7.96585	-7.5	0.164791	5	33.8952	-11.0958	-2.84279	26.9332	9.80486	b4014, b0010, b1107, b1380, b2467	ACt2rpp, AGM3PH, AGM4PH, AGMH, GDPMNP, LDH_D
7660	-57.8474	EX_succ_e	7.96585	-7.5	0.164791	5	33.8952	-11.0958	-2.84279	26.9332	9.80486	b0010, b4067, b4094, b1380, b0432	ACt2rpp, ACt4pp, CYTBO3_4pp, GLYCLTt4pp, LDH_D, R15BPK
7661	-57.8474	EX_succ_e	7.96585	-7.5	0.164791	5	33.8952	-11.0958	-2.84279	26.9332	9.80486	b3500, b2243, b0010, b4115, b1380	ACt2rpp, ARGAGMt7pp, G3PD6, G3PD7, GTHOr, LDH_D
7662	-57.8474	EX_succ_e	7.96585	-7.5	0.164791	5	33.8952	-11.0958	-2.84279	26.9332	9.80486	b0010, b3610, b1380, b1090, b1686	ACPPAT120, ACPPAT140, ACPPAT141, ACPPAT160, ACPPAT161, ACPPAT180, ACPPAT181, ACt2rpp, DHNCOAT, LDH_D
7663	-57.8474	EX_succ_e	7.96585	-7.5	0.164791	5	33.8952	-11.0958	-2.84279	26.9332	9.80486	b2040, b0010, b4115, b1380, b1733	ACt2rpp, ARGAGMt7pp, DC6PDA, LDH_D, TDPDRR
7664	-57.8474	EX_succ_e	7.96585	-7.5	0.164791	5	33.8952	-11.0958	-2.84279	26.9332	9.80486	b0010, b4115, b0933, b3624, b1380	ACt2rpp, ARGAGMt7pp, ETHSO3abcpp, LDH_D, MOAT3C, MSO3abcpp, SULFACabcpp
7665	-57.8474	EX_succ_e	7.96585	-7.5	0.164791	5	33.8952	-11.0958	-2.84279	26.9332	9.80486	b3526, b0010, b0067, b0757, b1380	ACt2rpp, DDGLK, GALKr, LDH_D, THMabcpp
7666	-57.8474	EX_succ_e	7.96585	-7.5	0.164791	5	33.8952	-11.0958	-2.84279	26.9332	9.80486	b2243, b3575, b0010, b1380, b3878	ACt2rpp, DOGULNR, G3PD6, G3PD7, LDH_D, SQGH
7667	-57.8474	EX_succ_e	7.96585	-7.5	0.164791	5	33.8952	-11.0958	-2.84279	26.9332	9.80486	b2291, b2661, b0010, b1380, b4209	ACt2rpp, FESR, LDH_D
7668	-57.8474	EX_succ_e	7.96585	-7.5	0.164791	5	33.8952	-11.0958	-2.84279	26.9332	9.80486	b0010, b3480, b1380, b1473, b2683	ACt2rpp, LDH_D, PHEtipp, TRPtipp, TYRtipp
7669	-57.8474	EX_succ_e	7.96585	-7.5	0.164791	5	33.8952	-11.0958	-2.84279	26.9332	9.80486	b0010, b4115, b1380, b2660, b1990	ACt2rpp, ARGAGMt7pp, LDH_D, SHGO
7670	-57.8474	EX_succ_e	7.96585	-7.5	0.164791	5	33.8952	-11.0958	-2.84279	26.9332	9.80486	b1701, b0010, b4115, b1380, b4167	ACt2rpp, ARGAGMt7pp, LDH_D, NADHXD, NADHXE, NADPHXD, NADPHXE
7671	-57.8474	EX_succ_e	7.96585	-7.5	0.164791	5	33.8952	-11.0958	-2.84279	26.9332	9.80486	b3500, b3565, b0010, b1380, b0681	ACt2rpp, GTHOr, LDH_D, XYLI1, XYLI2
7672	-57.8474	EX_succ_e	7.96585	-7.5	0.164791	5	33.8952	-11.0958	-2.84279	26.9332	9.80486	b3500, b0010, b4115, b4094, b1380	ACt2rpp, ARGAGMt7pp, GTHOr, LDH_D, R15BPK
7673	-57.8473	EX_succ_e	7.96586	-7.5	0.164789	5	33.8952	-11.0958	-2.84279	26.9332	9.80483	b0003, b0010, b3610, b1380, b1090	4HTHRK, ACPPAT120, ACPPAT140, ACPPAT141, ACPPAT160, ACPPAT161, ACPPAT180, ACPPAT181, ACt2rpp, HSK, LDH_D
7674	-57.8465	EX_succ_e	7.9661	-7.5	0.164615	5	33.8937	-11.0943	-2.8428	26.9332	9.80332	b3708, b0010, b2320, b0307, b1380	ACt2rpp, LDH_D, PERD, TRPAS2
7675	-57.8448	EX_succ_e	7.96598	-7.5	0.164702	5	33.8927	-11.0958	-2.84297	26.9319	9.80373	b1656, b0010, b1918, b1380, b1341	ACt2rpp, CYSabcpp, LDH_D
7676	-57.8439	EX_succ_e	7.9664	-7.5	0.164399	5	33.8918	-11.0958	-2.84282	26.9332	9.80144	b0010, b1064, b0692, b1380, b3542	ACt2rpp, ASR, CGLYabcpp, LDH_D, PROGLYabcpp, PTRCORNt7pp
7677	-57.7489	EX_succ_e	7.96585	-7.5	0.164791	6	33.8952	-11.0928	-2.84279	26.9332	9.80486	b2029, b0010, b4115, b1380, b0723, b1193	ACt2rpp, ARGAGMt7pp, GND, LDH_D, SUCDi
7678	-57.7484	EX_succ_e	7.96585	-7.5	0.164791	8	33.8952	-10.6936	-2.84279	26.9332	9.80486	b3844, b0241, b0010, b0861, b4115, b1064, b2919, b1380	ACt2rpp, ARGAGMt7pp, ASR, FADRx, FE3Ri, FLVRx, LDH_D, MMCD
7679	-57.7484	EX_succ_e	7.96585	-7.5	0.164791	8	33.8952	-10.6936	-2.84279	26.9332	9.80486	b3903, b3844, b0010, b4115, b4120, b1380, b4233, b1794	ACt2rpp, ARGAGMt7pp, FADRx, FE3Ri, FLVRx, LDH_D, LYXI, RMI, UM3PL, UM4PL
7680	-57.7484	EX_succ_e	7.96585	-7.5	0.164791	8	33.8952	-10.6936	-2.84279	26.9332	9.80486	b3011, b3844, b0010, b4115, b0979, b3502, b1380, b2906	13PPDH2, ACt2rpp, ARGAGMt7pp, ASO3t8pp, CYTBD2pp, FADRx, FE3Ri, FLVRx, LDH_D, OPHHXy
7681	-57.7484	EX_succ_e	7.96585	-7.5	0.164791	8	33.8952	-10.6936	-2.84279	26.9332	9.80486	b3844, b3092, b2205, b0010, b4115, b2179, b1186, b1380	ACt2rpp, ARGAGMt7pp, FADRx, FE3Ri, FLVRx, GUI1, GUI2, LDH_D, NAt3_1p5pp, NO3R1bpp
7682	-57.7484	EX_succ_e	7.96585	-7.5	0.164791	8	33.8952	-10.6936	-2.84279	26.9332	9.80486	b3844, b2799, b0010, b4123, b0311, b4115, b0040, b1380	ACt2rpp, ARGAGMt7pp, CHOLD, CRNt7pp, CRNt8pp, FADRx, FE3Ri, FLVRx, LCARS, LDH_D, SUCTARTtpp, TARTt2_3pp
7683	-57.7484	EX_succ_e	7.96585	-7.5	0.164791	8	33.8952	-10.6936	-2.84279	26.9332	9.80486	b3844, b3709, b0010, b1380, b1798, b4101, b1400, b1090	2HPTCOAT, ACPPAT120, ACPPAT140, ACPPAT141, ACPPAT160, ACPPAT161, ACPPAT180, ACPPAT181, ACt2rpp, ARMEPNS, FADRx, FE3Ri, FLVRx, LDH_D
7684	-57.7484	EX_succ_e	7.96585	-7.5	0.164791	8	33.8952	-10.6936	-2.84279	26.9332	9.80486	b3844, b0505, b0010, b0388, b2578, b1380, b1486, b1338	4ABZGLUH, ACt2rpp, FADRx, FE3Ri, FLVRx, LDH_D, UGLYCH
7685	-57.7484	EX_succ_e	7.96585	-7.5	0.164791	8	33.8952	-10.6936	-2.84279	26.9332	9.80486	b1849, b3844, b0312, b0996, b0010, b2536, b1380, b4386	ACt2rpp, BETALDHx, BETALDHy, FADRx, FE3Ri, FLVRx, GART, LDH_D, LIPAMPL, LIPATPT, OCTNLL, PPPNt2rpp
7686	-57.7477	EX_succ_e	7.9661	-7.5	0.164617	8	33.8937	-10.6921	-2.8428	26.9332	9.80334	b3708, b2930, b3844, b1493, b0010, b4115, b0573, b1380	ACt2rpp, AGt3, ARGAGMt7pp, CUt3, FADRx, FE3Ri, FLVRx, LDH_D, TRPAS2
7687	-57.7474	EX_succ_e	7.96585	-7.5	0.164791	6	33.8952	-11.0958	-2.84279	26.9332	9.80486	b1521, b0010, b0765, b4115, b1761, b1380	ACt2rpp, ARGAGMt7pp, LDH_D, TAGURr, TUNGSabcpp
7688	-57.7474	EX_succ_e	7.96585	-7.5	0.164791	6	33.8952	-11.0958	-2.84279	26.9332	9.80486	b0485, b0010, b0066, b4055, b1727, b1380	ACt2rpp, GAPP, LDH_D, THMabcpp, TYRPpp
7689	-57.7474	EX_succ_e	7.96585	-7.5	0.164791	6	33.8952	-11.0958	-2.84279	26.9332	9.80486	b2210, b0010, b4115, b3603, b2303, b1380	ACt2rpp, ARGAGMt7pp, DHPTPE, LDH_D, MDH2, MDH3
7690	-57.7474	EX_succ_e	7.96585	-7.5	0.164791	6	33.8952	-11.0958	-2.84279	26.9332	9.80486	b3671, b0010, b4115, b1380, b1990, b1681	ACt2rpp, ARGAGMt7pp, LDH_D, S2FE2SR, S2FE2SS, S2FE2SS2, S2FE2ST, S4FE4SR, S4FE4ST
7691	-57.7474	EX_succ_e	7.96585	-7.5	0.164791	6	33.8952	-11.0958	-2.84279	26.9332	9.80486	b2521, b4477, b0674, b0010, b1858, b1380	ACt2rpp, ASNS1, DDPGALA, LDH_D, MCPST, ZNabcpp
7692	-57.7474	EX_succ_e	7.96585	-7.5	0.164791	6	33.8952	-11.0958	-2.84279	26.9332	9.80486	b0010, b4115, b2201, b1380, b4356, b1391	ACt2rpp, ARGAGMt7pp, GALCTNLt2pp, LDH_D, PACCOAE, PHEMEabcpp
7693	-57.7474	EX_succ_e	7.96585	-7.5	0.164791	6	33.8952	-11.0958	-2.84279	26.9332	9.80486	b2436, b0348, b0010, b4115, b2201, b1380	ACt2rpp, ARGAGMt7pp, CPPPGO, DHCINDO, HPPPNDO, LDH_D, PHEMEabcpp
7694	-57.7474	EX_succ_e	7.96585	-7.5	0.164791	6	33.8952	-11.0958	-2.84279	26.9332	9.80486	b0010, b0765, b4035, b1380, b1621, b3241	14GLUCANabcpp, 4HBZt3pp, ACt2rpp, LDH_D, MALTHXabcpp, MALTPTabcpp, MALTTRabcpp, MALTTTRabcpp, MALTabcpp, MALTptspp, TUNGSabcpp
7695	-57.7474	EX_succ_e	7.96585	-7.5	0.164791	6	33.8952	-11.0958	-2.84279	26.9332	9.80486	b0010, b0867, b2150, b1223, b1380, b1870	ACt2rpp, CXSAMS, GLCabcpp, LDH_D
7696	-57.7474	EX_succ_e	7.96585	-7.5	0.164791	6	33.8952	-11.0958	-2.84279	26.9332	9.80486	b0078, b0010, b1380, b2480, b1385, b1394	ACt2rpp, ALDD19xr, LDH_D, OXDHCOAT, REPHACCOAI
7697	-57.7474	EX_succ_e	7.96585	-7.5	0.164791	6	33.8952	-11.0958	-2.84279	26.9332	9.80486	b1613, b4197, b3845, b0010, b3502, b1380	ACt2rpp, ASO3t8pp, LDH_D, MAN6PI
7698	-57.7474	EX_succ_e	7.96585	-7.5	0.164791	6	33.8952	-11.0958	-2.84279	26.9332	9.80486	b1993, b0010, b0066, b4115, b1380, b4129	ACBIPGT, ACt2rpp, ADOCBIK, AP4AS, ARGAGMt7pp, LDH_D, THMabcpp
7699	-57.7474	EX_succ_e	7.96585	-7.5	0.164791	6	33.8952	-11.0958	-2.84279	26.9332	9.80486	b3940, b4388, b0010, b1250, b1380, b3447	ACt2rpp, GTHRDHpp, LDH_D, PSP_L
7700	-57.7474	EX_succ_e	7.96585	-7.5	0.164791	6	33.8952	-11.0958	-2.84279	26.9332	9.80486	b0010, b2587, b4115, b0933, b1380, b2247	ACt2rpp, AKGt2rpp, ARGAGMt7pp, ETHSO3abcpp, LDH_D, MSO3abcpp, RHMND, SULFACabcpp
7701	-57.7474	EX_succ_e	7.96585	-7.5	0.164791	6	33.8952	-11.0958	-2.84279	26.9332	9.80486	b2418, b4322, b0010, b4115, b1380, b0831	ACt2rpp, ARGAGMt7pp, GTHRDabcpp, LDH_D, MNNH, PYDAMK, PYDXNK
7702	-57.7474	EX_succ_e	7.96585	-7.5	0.164791	6	33.8952	-11.0958	-2.84279	26.9332	9.80486	b3526, b0010, b0932, b0067, b1919, b1380	ACt2rpp, CYSDDS, DDGLK, LDH_D, THMabcpp
7703	-57.7474	EX_succ_e	7.96585	-7.5	0.164791	6	33.8952	-11.0958	-2.84279	26.9332	9.80486	b2291, b2661, b0010, b1380, b3488, b4209	ACt2rpp, FESR, INOSTO, LDH_D
7704	-57.7473	EX_succ_e	7.96586	-7.5	0.164789	6	33.8952	-11.0958	-2.84279	26.9332	9.80483	b0003, b0010, b3610, b1380, b1090, b1686	4HTHRK, ACPPAT120, ACPPAT140, ACPPAT141, ACPPAT160, ACPPAT161, ACPPAT180, ACPPAT181, ACt2rpp, DHNCOAT, HSK, LDH_D
7705	-57.7437	EX_succ_e	7.96644	-7.5	0.16437	6	33.8916	-11.0958	-2.84283	26.9332	9.80119	b2251, b1701, b0010, b4115, b0809, b1380	ACt2rpp, ARGAGMt7pp, GLNabcpp, LDH_D
7706	-57.72	EX_succ_e	7.9426	-7.5	0.163438	5	33.7679	-11.0958	-2.83632	26.8381	9.76615	b0010, b3568, b4115, b0199, b1380	ACt2rpp, ARGAGMt7pp, LDH_D, METDabcpp, METabcpp, XYLabcpp
7707	-57.6489	EX_succ_e	7.96585	-7.5	0.164791	7	33.8952	-11.0928	-2.84279	26.9332	9.80486	b1260, b2029, b0010, b2169, b1380, b0723, b1193	ACt2rpp, FRUptspp, GND, LDH_D, SUCDi, TRPS1, TRPS2, TRPS3
7708	-57.6484	EX_succ_e	7.96585	-7.5	0.164791	9	33.8952	-10.6936	-2.84279	26.9332	9.80486	b3844, b0010, b2720, b0388, b2578, b3469, b1380, b1486, b1338	4ABZGLUH, ACt2rpp, CD2abcpp, COBALT2abcpp, CU2abcpp, FADRx, FE3Ri, FLVRx, HG2abcpp, LDH_D, NI2abcpp, ZN2abcpp
7709	-57.6474	EX_succ_e	7.96585	-7.5	0.164791	7	33.8952	-11.0958	-2.84279	26.9332	9.80486	b2539, b0010, b0765, b2933, b1380, b1515, b3241	4HBZt3pp, ACt2rpp, AI2abcpp, CINNDO, LDH_D, PPPNDO, TUNGSabcpp
7710	-57.6474	EX_succ_e	7.96585	-7.5	0.164791	7	33.8952	-11.0958	-2.84279	26.9332	9.80486	b1849, b0312, b0241, b0996, b0010, b1380, b2257	ACt2rpp, BETALDHx, BETALDHy, GART, LA4NTpp, LDH_D
7711	-57.6474	EX_succ_e	7.96585	-7.5	0.164791	7	33.8952	-11.0958	-2.84279	26.9332	9.80486	b3709, b0010, b1380, b1798, b1400, b0874, b1090	2HPTCOAT, ACPPAT120, ACPPAT140, ACPPAT141, ACPPAT160, ACPPAT161, ACPPAT180, ACPPAT181, ACt2rpp, LDH_D
7713	-57.6474	EX_succ_e	7.96585	-7.5	0.164791	7	33.8952	-11.0958	-2.84279	26.9332	9.80486	b1993, b0010, b0066, b4115, b1737, b1380, b4129	ACBIPGT, ACt2rpp, ADOCBIK, AP4AS, ARGAGMt7pp, CHTBSptspp, LDH_D, THMabcpp
7714	-57.6474	EX_succ_e	7.96585	-7.5	0.164791	7	33.8952	-11.0958	-2.84279	26.9332	9.80486	b2436, b0010, b4115, b3726, b2201, b1380, b0723	ACt2rpp, ARGAGMt7pp, CPPPGO, LDH_D, PHEMEabcpp, PIuabcpp, SUCDi
7715	-57.6474	EX_succ_e	7.96585	-7.5	0.164791	7	33.8952	-11.0958	-2.84279	26.9332	9.80486	b0010, b1709, b3460, b3750, b1380, b1385, b1394	ACt2rpp, ADOCBLabcpp, ALAabcpp, ALDD19xr, CBIuabcpp, CBL1abcpp, ILEabcpp, LDH_D, OXDHCOAT, REPHACCOAI, THRabcpp, VALabcpp
7717	-57.6127	EX_succ_e	7.9923	-7.5	0.14593	5	33.4165	-10.6074	-2.72157	26.6039	9.53416	b3844, b4117, b0010, b3737, b1380	ACt2rpp, ARGDC, ATPS4rpp, FADRx, FE3Ri, FLVRx, LDH_D
7719	-57.5489	EX_succ_e	7.96585	-7.5	0.164791	8	33.8952	-11.0928	-2.84279	26.9332	9.80486	b2029, b0010, b4115, b3726, b2201, b1380, b0723, b1193	ACt2rpp, ARGAGMt7pp, GND, LDH_D, PHEMEabcpp, PIuabcpp, SUCDi
7720	-57.5474	EX_succ_e	7.96585	-7.5	0.164791	8	33.8952	-11.0958	-2.84279	26.9332	9.80486	b3671, b4322, b3526, b0010, b4115, b1380, b0831, b1990	ACt2rpp, ARGAGMt7pp, DDGLK, GTHRDabcpp, LDH_D, MNNH
7721	-57.5474	EX_succ_e	7.96585	-7.5	0.164791	8	33.8952	-11.0958	-2.84279	26.9332	9.80486	b1993, b0010, b0066, b4115, b1270, b1737, b1380, b4129	ACBIPGT, ACt2rpp, ADOCBIK, AP4AS, ARGAGMt7pp, CBIAT, CBLAT, CHTBSptspp, LDH_D, THMabcpp
7723	-57.5474	EX_succ_e	7.96585	-7.5	0.164791	8	33.8952	-11.0958	-2.84279	26.9332	9.80486	b0337, b0010, b4115, b0752, b0979, b3502, b0040, b1380	ACt2rpp, ARGAGMt7pp, ASO3t8pp, CRNt7pp, CRNt8pp, CSND, CYTBD2pp, LDH_D
7724	-57.5243	EX_succ_e	7.9923	-7.5	0.14593	5	33.4165	-10.7843	-2.72157	26.6039	9.53416	b4117, b0010, b0679, b3732, b1380	ACt2rpp, ARGDC, ATPS4rpp, LDH_D
7726	-57.3028	EX_succ_e	7.9923	-7.5	0.14593	3	32.995	-10.7843	-2.73426	26.2926	9.43658	b0010, b3737, b1380	ACt2rpp, ATPS4rpp, LDH_D
7727	-57.2875	EX_succ_e	7.9923	-7.5	0.14593	4	32.995	-10.6149	-2.73426	26.2926	9.43658	b3844, b0010, b3732, b1380	ACt2rpp, ATPS4rpp, FADRx, FE3Ri, FLVRx, LDH_D
7729	-57.2772	EX_succ_e	7.97472	-7.5	0.158466	5	33.124	-10.6936	-2.91842	26.4472	9.59527	b0720, b3844, b2905, b0010, b1380	ACt2rpp, CS, FADRx, FE3Ri, FLVRx, GLYCL, LDH_D
7731	-57.1875	EX_succ_e	7.9923	-7.5	0.14593	5	32.995	-10.6149	-2.73426	26.2926	9.43658	b3844, b0010, b0765, b3732, b1380	ACt2rpp, ATPS4rpp, FADRx, FE3Ri, FLVRx, LDH_D, TUNGSabcpp
7732	-57.1705	EX_succ_e	7.9748	-7.5	0.158407	6	33.1173	-10.6936	-2.91892	26.4428	9.59339	b1136, b3844, b0010, b3927, b1380, b0826	ACt2rpp, FADRx, FE3Ri, FLVRx, GLYALDtpp, GLYtpp, ICDHyr, LDH_D, MPTSS, UREAtpp
7733	-57.1087	EX_succ_e	7.99257	-7.5	0.145739	5	33.0008	-10.7843	-2.73541	26.2992	9.437	b0010, b4115, b3732, b0809, b1380	ACt2rpp, ARGAGMt7pp, ATPS4rpp, GLNabcpp, LDH_D
7734	-57.1028	EX_succ_e	7.9923	-7.5	0.14593	5	32.995	-10.7843	-2.73426	26.2926	9.43658	b3752, b0010, b4115, b3733, b1380	ACt2rpp, ARGAGMt7pp, ATPS4rpp, LDH_D, RBK
7735	-57.0875	EX_succ_e	7.9923	-7.5	0.14593	6	32.995	-10.6149	-2.73426	26.2926	9.43658	b3844, b0010, b3732, b1380, b4159, b3816	ACt2rpp, ATPS4rpp, FADRx, FE3Ri, FLVRx, LDH_D, MG2tpp, NI2tpp
7736	-57.0761	EX_succ_e	7.97472	-7.5	0.158466	5	33.124	-11.0958	-2.91842	26.4472	9.59527	b0720, b2905, b0010, b2490, b1380	ACt2rpp, CS, GLYCL, LDH_D
7737	-57.0028	EX_succ_e	7.9923	-7.5	0.14593	6	32.995	-10.7843	-2.73426	26.2926	9.43658	b3752, b0010, b3733, b2256, b1380, b0118	ACt2rpp, ATPS4rpp, LDH_D, MICITDr, RBK, UPLA4FNF
7738	-56.9791	EX_succ_e	7.97472	-7.5	0.158466	6	33.124	-11.0897	-2.91842	26.4472	9.59527	b1136, b0825, b2905, b0010, b1380, b2660	ACt2rpp, GLYCL, ICDHyr, LDH_D, SHGO
7739	-56.9563	EX_succ_e	7.97777	-7.5	0.156291	6	32.8945	-10.6764	-2.93656	26.302	9.52898	b0720, b3844, b4117, b0010, b3927, b1380	ACt2rpp, ARGDC, CS, FADRx, FE3Ri, FLVRx, GLYALDtpp, GLYtpp, LDH_D, UREAtpp
7740	-56.8772	EX_succ_e	7.97472	-7.5	0.158466	9	33.124	-10.6936	-2.91842	26.4472	9.59527	b1136, b3844, b0825, b2905, b0010, b4087, b1380, b0624, b2134	ACt2rpp, ALLabcpp, FADRx, FE3Ri, FLVRx, Ftpp, GLYCL, ICDHyr, LDH_D
7741	-56.8563	EX_succ_e	7.97777	-7.5	0.156291	7	32.8945	-10.6764	-2.93656	26.302	9.52898	b2436, b1136, b3844, b0010, b4115, b3927, b1380	ACt2rpp, ARGAGMt7pp, CPPPGO, FADRx, FE3Ri, FLVRx, GLYALDtpp, GLYtpp, ICDHyr, LDH_D, UREAtpp
7742	-56.8563	EX_succ_e	7.97777	-7.5	0.156291	7	32.8945	-10.6764	-2.93656	26.302	9.52898	b1136, b3844, b4198, b0010, b4115, b3927, b1380	ACt2rpp, ARGAGMt7pp, FADRx, FE3Ri, FLVRx, GLYALDtpp, GLYtpp, ICDHyr, LDH_D, UREAtpp
7744	-56.8028	EX_succ_e	7.9923	-7.5	0.14593	8	32.995	-10.7843	-2.73426	26.2926	9.43658	b1398, b0351, b3752, b0010, b3733, b2256, b1380, b0118	ACt2rpp, ATPS4rpp, LDH_D, MICITDr, PACCOAL, RBK, UPLA4FNF
7745	-56.8028	EX_succ_e	7.9923	-7.5	0.14593	8	32.995	-10.7843	-2.73426	26.2926	9.43658	b0078, b0010, b3460, b3735, b1380, b2480, b1385, b1394	ACt2rpp, ALAabcpp, ALDD19xr, ATPS4rpp, ILEabcpp, LDH_D, OXDHCOAT, REPHACCOAI, THRabcpp, VALabcpp
7746	-56.7629	EX_succ_e	7.97769	-7.5	0.156349	8	32.9011	-10.6764	-2.93607	26.3063	9.53084	b0720, b2036, b3844, b4117, b2903, b0010, b2927, b1380	ACt2rpp, ARGDC, CS, FADRx, FE3Ri, FLVRx, GLYCL, LDH_D, UDPGALM
7749	-56.6582	EX_succ_e	7.97777	-7.5	0.156291	7	32.8945	-11.0725	-2.93656	26.302	9.52898	b2436, b1136, b0010, b1291, b4115, b3927, b1380	ACt2rpp, ARGAGMt7pp, CPPPGO, GLYALDtpp, GLYtpp, ICDHyr, LDH_D, UREAtpp
7750	-56.5563	EX_succ_e	7.97777	-7.5	0.156291	10	32.8945	-10.6764	-2.93656	26.302	9.52898	b1136, b3115, b3844, b0010, b4115, b4265, b0854, b3927, b1380, b1734	5DGLCNt2rpp, ACt2rpp, ARGAGMt7pp, FADRx, FE3Ri, FLVRx, GLYALDtpp, GLYtpp, ICDHyr, IDONt2rpp, LDH_D, MC6PH, PPAKr, UREAtpp
7751	-56.5563	EX_succ_e	7.97777	-7.5	0.156291	10	32.8945	-10.6764	-2.93656	26.302	9.52898	b1136, b3844, b0010, b0932, b4115, b4265, b0854, b3927, b1380, b1734	5DGLCNt2rpp, ACt2rpp, ARGAGMt7pp, FADRx, FE3Ri, FLVRx, GLYALDtpp, GLYtpp, ICDHyr, IDONt2rpp, LDH_D, MC6PH, UREAtpp
7752	-55.4809	EX_succ_e	7.2648	-7.5	0.163813	5	31.3191	-10.6764	-2.58774	24.7322	9.17463	b1136, b3844, b4117, b0010, b1380	ACt2rpp, ARGDC, FADRx, FE3Ri, FLVRx, ICDHyr, LDH_D
7753	-55.3828	EX_succ_e	7.2648	-7.5	0.163813	4	31.3191	-11.0725	-2.58774	24.7322	9.17463	b4117, b0617, b0010, b1380	ACt2rpp, ARGDC, CITL, LDH_D
7755	-55.3809	EX_succ_e	7.2648	-7.5	0.163813	6	31.3191	-10.6764	-2.58774	24.7322	9.17463	b1136, b3844, b4117, b0010, b1380, b2021	ACt2rpp, ARGDC, FADRx, FE3Ri, FLVRx, HSTPT, ICDHyr, LDH_D
7756	-55.3809	EX_succ_e	7.2648	-7.5	0.163813	6	31.3191	-10.6764	-2.58774	24.7322	9.17463	b3844, b4117, b0617, b0010, b3450, b1380	ACt2rpp, ARGDC, CITL, FADRx, FE3Ri, FLVRx, G3PCabcpp, G3PEabcpp, G3PGabcpp, G3PIabcpp, G3PSabcpp, GLYC2Pabcpp, GLYC3Pabcpp, LDH_D
7757	-55.3809	EX_succ_e	7.2648	-7.5	0.163813	6	31.3191	-10.6764	-2.58774	24.7322	9.17463	b3844, b4117, b0614, b0010, b1246, b1380	ACt2rpp, ARGDC, CITL, FADRx, FE3Ri, FLVRx, LDH_D
7759	-54.708	EX_succ_e	8.08974	-7.5	0.0764348	6	30.3541	-10.0921	-2.92765	24.8972	8.38456	b3844, b4117, b2903, b0010, b3919, b1380	ACt2rpp, ARGDC, FADRx, FE3Ri, FLVRx, GLYCL, LDH_D, TPI
7760	-54.6256	EX_succ_e	7.99739	-7.5	0.142297	4	30.2881	-10.525	-2.70903	24.2434	8.75375	b4117, b0010, b0114, b1380	ACt2rpp, ARGDC, LDH_D, PDH
7761	-54.6125	EX_succ_e	8.08977	-7.5	0.0764107	7	30.3586	-10.0921	-2.92736	24.9005	8.38541	b3844, b3517, b0010, b4115, b3919, b3927, b1380	ACt2rpp, ARGAGMt7pp, FADRx, FE3Ri, FLVRx, GLYALDtpp, GLYtpp, LDH_D, TPI, UREAtpp
7762	-54.5778	EX_succ_e	7.99739	-7.5	0.142297	5	30.2881	-10.4206	-2.70903	24.2434	8.75375	b3844, b4117, b0010, b0114, b1380	ACt2rpp, ARGDC, FADRx, FE3Ri, FLVRx, LDH_D, PDH
7763	-54.4593	EX_succ_e	7.99479	-7.5	0.144155	4	30.13	-10.5414	-2.72747	24.1246	8.73293	b2502, b0010, b0114, b1380	ACt2rpp, LDH_D, PDH
7764	-54.4393	EX_succ_e	8.08717	-7.5	0.0782658	5	29.9966	-10.1146	-2.94924	24.6291	8.31674	b3844, b2905, b0010, b3919, b1380	ACt2rpp, FADRx, FE3Ri, FLVRx, GLYCL, LDH_D, TPI
7765	-54.0019	EX_succ_e	8.00636	-7.5	0.135902	5	29.6786	-10.3534	-2.71252	23.8252	8.56594	b3844, b0010, b0114, b3927, b1380	ACt2rpp, FADRx, FE3Ri, FLVRx, GLYALDtpp, GLYtpp, LDH_D, PDH, UREAtpp
7766	-53.9483	EX_succ_e	8.00636	-7.5	0.135902	5	29.6786	-10.4607	-2.71252	23.8252	8.56594	b1264, b0010, b0114, b3927, b1380	ACt2rpp, ANS, GLYALDtpp, GLYtpp, LDH_D, PDH, UREAtpp
7767	-53.9483	EX_succ_e	8.00636	-7.5	0.135902	5	29.6786	-10.4607	-2.71252	23.8252	8.56594	b0980, b0010, b0114, b3927, b1380	ACt2rpp, GLYALDtpp, GLYtpp, LDH_D, NTP3pp, PDH, PHYTSpp, UREAtpp
7768	-53.7864	EX_succ_e	8.00936	-7.5	0.133762	7	29.6548	-10.3368	-2.71269	23.8214	8.54602	b3844, b0010, b4115, b0114, b1723, b3927, b1380	ACt2rpp, ARGAGMt7pp, FADRx, FE3Ri, FLVRx, GLYALDtpp, GLYtpp, LDH_D, PDH, UREAtpp
7769	-53.5924	EX_succ_e	6.8769	-7.5	0.163813	4	29.3392	-10.6936	-2.47957	23.1135	8.70522	b1136, b3844, b0010, b1380	ACt2rpp, FADRx, FE3Ri, FLVRx, ICDHyr, LDH_D
7770	-53.5924	EX_succ_e	6.8769	-7.5	0.163813	4	29.3392	-10.6936	-2.47957	23.1135	8.70522	b3844, b0617, b0010, b1380	ACt2rpp, CITL, FADRx, FE3Ri, FLVRx, LDH_D
7771	-53.5596	EX_succ_e	6.9002	-7.5	0.157723	5	29.3476	-10.5759	-2.48506	23.1658	8.66689	b3844, b4122, b0010, b1380, b1206	ACt2rpp, ASPtpp, DTARTD, FADRx, FE3Ri, FLVRx, FUMt1pp, LDH_D, SUCCt1pp
7772	-53.4943	EX_succ_e	6.8769	-7.5	0.163813	3	29.3392	-11.0897	-2.47957	23.1135	8.70522	b0617, b0010, b1380	ACt2rpp, CITL, LDH_D
7774	-53.4943	EX_succ_e	6.8769	-7.5	0.163813	3	29.3392	-11.0897	-2.47957	23.1135	8.70522	b1136, b0010, b1380	ACt2rpp, ICDHyr, LDH_D
7776	-53.4875	EX_succ_e	8.00729	-7.5	0.135235	6	29.2636	-10.3522	-2.73228	23.5296	8.46628	b2502, b3844, b2905, b0010, b0114, b1380	ACt2rpp, FADRx, FE3Ri, FLVRx, GLYCL, LDH_D, PDH
7777	-53.4864	EX_succ_e	8.00936	-7.5	0.133762	10	29.6548	-10.3368	-2.71269	23.8214	8.54602	b3844, b3583, b0010, b2424, b4115, b1329, b0114, b1723, b3927, b1380	ACt2rpp, ARGAGMt7pp, FADRx, FE3Ri, FLVRx, GLYALDtpp, GLYtpp, LDH_D, PDH, SELabcpp, SLNTabcpp, TSULabcpp, UREAtpp
7778	-53.4326	EX_succ_e	8.00936	-7.5	0.133762	10	29.6548	-10.4443	-2.71269	23.8214	8.54602	b0593, b0010, b2424, b4115, b0114, b2934, b1723, b1308, b3927, b1380	ACt2rpp, ARGAGMt7pp, CYANSTpp, GLYALDtpp, GLYtpp, ICHORS_copy1, LDH_D, PDH, SELabcpp, SLNTabcpp, TSULabcpp, UREAtpp
7779	-53.2596	EX_succ_e	6.9002	-7.5	0.157723	8	29.3476	-10.5759	-2.48506	23.1658	8.66689	b3844, b0517, b0010, b0813, b1442, b1380, b3291, b1206	ACt2rpp, ASPtpp, FADRx, FE3Ri, FLVRx, FUMt1pp, LDH_D, SUCCt1pp, URDGLYCD
7780	-53.1943	EX_succ_e	6.8769	-7.5	0.163813	6	29.3392	-11.0897	-2.47957	23.1135	8.70522	b1136, b3430, b4198, b0010, b4115, b1380	ACt2rpp, ARGAGMt7pp, GLGC, ICDHyr, LDH_D
7781	-53.1924	EX_succ_e	6.8769	-7.5	0.163813	8	29.3392	-10.6936	-2.47957	23.1135	8.70522	b2930, b3844, b2787, b1493, b0617, b0010, b4115, b1380	ACt2rpp, ARGAGMt7pp, CITL, FADRx, FE3Ri, FLVRx, LDH_D
7782	-51.313	EX_succ_e	7.79606	-7.5	0.285889	4	27.4945	-11.5631	-2.80703	21.2442	9.05731	b4117, b2903, b3736, b1378	ARGDC, ATPS4rpp, GLYCL, POR5
7783	-51.2405	EX_succ_e	7.79606	-7.5	0.285889	4	27.5234	-11.7657	-2.80473	21.2644	9.06371	b3844, b4115, b3927, b1378	ARGAGMt7pp, FADRx, FE3Ri, FLVRx, GLYALDtpp, GLYtpp, POR5, UREAtpp
7784	-51.2402	EX_succ_e	7.79187	-7.5	0.288878	1	27.1302	-11.5801	-2.80724	20.948	8.98944	b3735	ATPS4rpp
7785	-51.2383	EX_succ_e	7.79607	-7.5	0.285887	4	27.5235	-11.7704	-2.80473	21.2645	9.06374	b2464, b3927, b2701, b3924	FLDR2, GLYALDtpp, GLYtpp, UREAtpp
7786	-51.1805	EX_succ_e	7.79187	-7.5	0.288878	2	27.1302	-11.4994	-2.80724	20.948	8.98944	b3737, b1380	ATPS4rpp, LDH_D
7788	-51.0805	EX_succ_e	7.79187	-7.5	0.288878	3	27.1302	-11.4994	-2.80724	20.948	8.98944	b2905, b3736, b1380	ATPS4rpp, GLYCL, LDH_D
7790	-51.0805	EX_succ_e	7.79187	-7.5	0.288878	3	27.1302	-11.4994	-2.80724	20.948	8.98944	b3752, b3733, b1380	ATPS4rpp, LDH_D, RBK
7791	-51.0405	EX_succ_e	7.79606	-7.5	0.285889	6	27.5234	-11.7657	-2.80473	21.2644	9.06371	b3057, b3844, b4117, b3927, b1380, b1378	ARGDC, FADRx, FE3Ri, FLVRx, GLYALDtpp, GLYtpp, LDH_D, POR5, UREAtpp
7792	-51.0402	EX_succ_e	7.79187	-7.5	0.288878	3	27.1302	-11.5801	-2.80724	20.948	8.98944	b3844, b3902, b3732	ATPS4rpp, FADRx, FE3Ri, FLVRx, RMPA
7793	-51.0402	EX_succ_e	7.79187	-7.5	0.288878	3	27.1302	-11.5801	-2.80724	20.948	8.98944	b4115, b3731, b4291	ARGAGMt7pp, ATPS4rpp, FE3DCITtonex
7794	-51.0125	EX_succ_e	7.79187	-7.5	0.288878	4	27.1302	-11.4354	-2.80724	20.948	8.98944	b3844, b4115, b3733, b1380	ARGAGMt7pp, ATPS4rpp, FADRx, FE3Ri, FLVRx, LDH_D
7795	-51.0125	EX_succ_e	7.79187	-7.5	0.288878	4	27.1302	-11.4354	-2.80724	20.948	8.98944	b3844, b2905, b3736, b1380	ATPS4rpp, FADRx, FE3Ri, FLVRx, GLYCL, LDH_D
7797	-51.0125	EX_succ_e	7.79187	-7.5	0.288878	4	27.1302	-11.4354	-2.80724	20.948	8.98944	b3844, b2803, b3733, b1380	ATPS4rpp, FADRx, FCLK, FE3Ri, FLVRx, LDH_D
7798	-50.9947	EX_succ_e	7.79187	-7.5	0.288878	4	27.1302	-11.471	-2.80724	20.948	8.98944	b4117, b3875, b3735, b1380	ARGDC, ATPS4rpp, DHPStex, LDH_D, SQtex
7799	-50.9947	EX_succ_e	7.79187	-7.5	0.288878	4	27.1302	-11.471	-2.80724	20.948	8.98944	b4117, b2903, b3737, b1380	ARGDC, ATPS4rpp, GLYCL, LDH_D
7800	-50.9805	EX_succ_e	7.79187	-7.5	0.288878	4	27.1302	-11.4994	-2.80724	20.948	8.98944	b4115, b1197, b3737, b1380	ARGAGMt7pp, ATPS4rpp, LDH_D, TREHpp
7801	-50.9805	EX_succ_e	7.79187	-7.5	0.288878	4	27.1302	-11.4994	-2.80724	20.948	8.98944	b0963, b2421, b3736, b1380	ATPS4rpp, LDH_D, MGSA
7802	-50.9708	EX_succ_e	7.79606	-7.5	0.285889	2	27.056	-11.7704	-2.84194	20.9378	8.96006	b3844, b1378	FADRx, FE3Ri, FLVRx, POR5
7803	-50.9708	EX_succ_e	7.79606	-7.5	0.285889	2	27.056	-11.7704	-2.84194	20.9378	8.96006	b3350, b1378	POR5
7804	-50.9402	EX_succ_e	7.79187	-7.5	0.288878	4	27.1302	-11.5801	-2.80724	20.948	8.98944	b3844, b2903, b3738, b0315	ATPS4rpp, FADRx, FE3Ri, FLVRx, GLYCL
7805	-50.9402	EX_succ_e	7.79187	-7.5	0.288878	4	27.1302	-11.5801	-2.80724	20.948	8.98944	b3844, b2601, b2179, b3738	ATPS4rpp, FADRx, FE3Ri, FLVRx
7806	-50.9402	EX_succ_e	7.79187	-7.5	0.288878	4	27.1302	-11.5801	-2.80724	20.948	8.98944	b0828, b3747, b4115, b3731	ARGAGMt7pp, ATPS4rpp
7807	-50.9125	EX_succ_e	7.79187	-7.5	0.288878	5	27.1302	-11.4354	-2.80724	20.948	8.98944	b3844, b2905, b3736, b1380, b1679	ATPS4rpp, FADRx, FE3Ri, FLVRx, GLYCL, LDH_D, S2FE2SR, S2FE2SS, S2FE2SS2, SCYSDS
7809	-50.9045	EX_succ_e	7.79681	-7.5	0.285355	4	27.0542	-11.4994	-2.82153	20.9237	8.95207	b3052, b3733, b3927, b1380	ATPS4rpp, GLYALDtpp, GLYtpp, GMHEPAT, GMHEPK, LDH_D, UREAtpp
7810	-50.9045	EX_succ_e	7.79681	-7.5	0.285355	4	27.0542	-11.4994	-2.82153	20.9237	8.95207	b3731, b3927, b1380, b1249	ATPS4rpp, GLYALDtpp, GLYtpp, LDH_D, UREAtpp
7813	-50.8947	EX_succ_e	7.79187	-7.5	0.288878	5	27.1302	-11.471	-2.80724	20.948	8.98944	b3812, b4117, b1759, b3737, b1380	ARGDC, ATPS4rpp, LDH_D
7814	-50.8877	EX_succ_e	7.79681	-7.5	0.285355	4	27.0692	-11.5631	-2.82153	20.9359	8.9548	b4117, b3731, b2933, b3927	ARGDC, ATPS4rpp, GLYALDtpp, GLYtpp, UREAtpp
7815	-50.8805	EX_succ_e	7.79187	-7.5	0.288878	5	27.1302	-11.4994	-2.80724	20.948	8.98944	b3600, b4115, b3737, b2167, b1380	ARGAGMt7pp, ATPS4rpp, FRUptspp, LDH_D, M1PD
7816	-50.8775	EX_succ_e	7.79681	-7.5	0.285355	5	27.0692	-11.3835	-2.82153	20.9359	8.9548	b3844, b4117, b3737, b3927, b1380	ARGDC, ATPS4rpp, FADRx, FE3Ri, FLVRx, GLYALDtpp, GLYtpp, LDH_D, UREAtpp
7817	-50.8731	EX_succ_e	7.79606	-7.5	0.285889	3	27.056	-11.7657	-2.84194	20.9378	8.96006	b4117, b2903, b1378	ARGDC, GLYCL, POR5
7818	-50.8731	EX_succ_e	7.79606	-7.5	0.285889	3	27.056	-11.7657	-2.84194	20.9378	8.96006	b4117, b3290, b1378	ARGDC, POR5
7819	-50.8731	EX_succ_e	7.79607	-7.5	0.285887	3	27.0559	-11.7657	-2.84196	20.9378	8.96005	b4117, b0826, b3924	ARGDC, FLDR2, MPTSS
7820	-50.8731	EX_succ_e	7.79607	-7.5	0.285887	3	27.0559	-11.7657	-2.84196	20.9378	8.96005	b4117, b1380, b3924	ARGDC, FLDR2, LDH_D
7821	-50.8708	EX_succ_e	7.79606	-7.5	0.285889	3	27.056	-11.7704	-2.84194	20.9378	8.96006	b3350, b1380, b1378	LDH_D, POR5
7822	-50.8708	EX_succ_e	7.79606	-7.5	0.285889	3	27.056	-11.7704	-2.84194	20.9378	8.96006	b2905, b1380, b1378	GLYCL, LDH_D, POR5
7823	-50.8708	EX_succ_e	7.79606	-7.5	0.285889	3	27.056	-11.7704	-2.84194	20.9378	8.96006	b3089, b1380, b1378	LDH_D, POR5, SERt4pp, THRt4pp
7824	-50.8707	EX_succ_e	7.79607	-7.5	0.285887	3	27.0559	-11.7704	-2.84196	20.9378	8.96005	b0386, b1338, b3924	4ABZGLUH, FLDR2, P5CR
7825	-50.8487	EX_succ_e	7.79187	-7.5	0.288878	5	27.1302	-11.5631	-2.80724	20.948	8.98944	b3844, b4117, b2903, b3731, b2014	ARGDC, ATPS4rpp, FADRx, FE3Ri, FLVRx, GLYCL
7826	-50.8439	EX_succ_e	7.79681	-7.5	0.285355	5	27.0542	-11.4206	-2.82153	20.9237	8.95207	b3844, b3579, b3734, b3927, b1380	23DOGULNt4pp, ATPS4rpp, FADRx, FE3Ri, FLVRx, GLYALDtpp, GLYtpp, LDH_D, UREAtpp, XYLUt2pp
7827	-50.8439	EX_succ_e	7.79681	-7.5	0.285355	5	27.0542	-11.4206	-2.82153	20.9237	8.95207	b3126, b3844, b3733, b3927, b1380	ATPS4rpp, FADRx, FE3Ri, FLVRx, GLCRAL, GLYALDtpp, GLYtpp, LDH_D, UREAtpp
7828	-50.8439	EX_succ_e	7.79681	-7.5	0.285355	5	27.0542	-11.4206	-2.82153	20.9237	8.95207	b3844, b3737, b3927, b1380, b0494	ATPS4rpp, FADRx, FE3Ri, FLVRx, GLYALDtpp, GLYtpp, LDH_D, LPLIPAL1A120pp, LPLIPAL1A140pp, LPLIPAL1A141pp, LPLIPAL1A160pp, LPLIPAL1A161pp, LPLIPAL1A180pp, LPLIPAL1A181pp, LPLIPAL1E120pp, LPLIPAL1E140pp, LPLIPAL1E141pp, LPLIPAL1E160pp, LPLIPAL1E161pp, LPLIPAL1E180pp, LPLIPAL1E181pp, LPLIPAL1G120pp, LPLIPAL1G140pp, LPLIPAL1G141pp, LPLIPAL1G160pp, LPLIPAL1G161pp, LPLIPAL1G180pp, LPLIPAL1G181pp, UREAtpp
7829	-50.8412	EX_succ_e	7.79923	-7.5	0.283629	4	27.0313	-11.5801	-2.82164	20.9178	8.93509	b3846, b4352, b3735, b3927	ATPS4rpp, CTECOAI6, CTECOAI7, CTECOAI8, GLYALDtpp, GLYtpp, UREAtpp
7830	-50.8402	EX_succ_e	7.79187	-7.5	0.288878	5	27.1302	-11.5801	-2.80724	20.948	8.98944	b3951, b2049, b2905, b3736, b1679	ATPS4rpp, GLYCL, MAN1PT2, S2FE2SR, S2FE2SS, S2FE2SS2, SCYSDS
7831	-50.7947	EX_succ_e	7.79187	-7.5	0.288878	6	27.1302	-11.471	-2.80724	20.948	8.98944	b3812, b4117, b2903, b3460, b3737, b1380	ALAabcpp, ARGDC, ATPS4rpp, GLYCL, ILEabcpp, LDH_D, THRabcpp, VALabcpp
7832	-50.7947	EX_succ_e	7.79187	-7.5	0.288878	6	27.1302	-11.471	-2.80724	20.948	8.98944	b1611, b4117, b2903, b3732, b4478, b1380	ARGDC, ATPS4rpp, GALCTND, GLYCL, LDH_D
7833	-50.7877	EX_succ_e	7.79681	-7.5	0.285355	5	27.0692	-11.5631	-2.82153	20.9359	8.9548	b3052, b3844, b4117, b3733, b3927	ARGDC, ATPS4rpp, FADRx, FE3Ri, FLVRx, GLYALDtpp, GLYtpp, GMHEPAT, GMHEPK, UREAtpp
7834	-50.7805	EX_succ_e	7.79187	-7.5	0.288878	6	27.1302	-11.4994	-2.80724	20.948	8.98944	b1398, b2903, b3736, b3350, b1380, b0709	ATPS4rpp, GLYCL, LDH_D, PACCOAL
7838	-50.7707	EX_succ_e	7.79607	-7.5	0.285887	4	27.0559	-11.7704	-2.84196	20.9378	8.96005	b3844, b4198, b1380, b3924	FADRx, FE3Ri, FLDR2, FLVRx, LDH_D
7839	-50.7642	EX_succ_e	7.79681	-7.5	0.285355	5	27.0542	-11.5801	-2.82153	20.9237	8.95207	b0261, b3737, b4019, b3927, b0613	ATPS4rpp, GLYALDtpp, GLYtpp, HCYSMT, HCYSMT2, TPRDCOAS, UREAtpp
7841	-50.6877	EX_succ_e	7.79681	-7.5	0.285355	6	27.0692	-11.5631	-2.82153	20.9359	8.9548	b0261, b4115, b3737, b4019, b3927, b0613	ARGAGMt7pp, ATPS4rpp, GLYALDtpp, GLYtpp, HCYSMT, HCYSMT2, TPRDCOAS, UREAtpp
7843	-50.6731	EX_succ_e	7.79607	-7.5	0.285887	5	27.0559	-11.7657	-2.84196	20.9378	8.96005	b3844, b4117, b2903, b1380, b3924	ARGDC, FADRx, FE3Ri, FLDR2, FLVRx, GLYCL, LDH_D
7844	-50.6708	EX_succ_e	7.79606	-7.5	0.285889	5	27.056	-11.7704	-2.84194	20.9378	8.96006	b2905, b2871, b1380, b3542, b1378	CGLYabcpp, DAPAL, GLYCL, LDH_D, POR5, PROGLYabcpp
7845	-50.6708	EX_succ_e	7.79606	-7.5	0.285889	5	27.056	-11.7704	-2.84194	20.9378	8.96006	b2901, b3844, b2905, b1380, b1378	FADRx, FE3Ri, FLVRx, GLYCL, LDH_D, POR5
7846	-50.6625	EX_succ_e	7.79681	-7.5	0.285355	7	27.0692	-11.4133	-2.82153	20.9359	8.9548	b2029, b4117, b2738, b3738, b3927, b1380, b0827	ARGDC, ATPS4rpp, BMOCOS, BWCOS, GLYALDtpp, GLYtpp, GND, LDH_D, MOCOS, UREAtpp, WCOS
7847	-50.6471	EX_succ_e	7.79852	-7.5	0.284135	5	27.0323	-11.7704	-2.84232	20.9318	8.94282	b3846, b3197, b3844, b1380, b1378	CTECOAI6, CTECOAI7, CTECOAI8, FADRx, FE3Ri, FLVRx, LDH_D, POR5
7848	-50.6125	EX_succ_e	7.79187	-7.5	0.288878	8	27.1302	-11.4354	-2.80724	20.948	8.98944	b4069, b3844, b2601, b2905, b2179, b3738, b0931, b1380	ACS, ATPS4rpp, FADRx, FE3Ri, FLVRx, GLYCL, LDH_D, NAMNPP
7849	-50.6001	EX_succ_e	7.79606	-7.5	0.285889	7	27.056	-11.5116	-2.84194	20.9378	8.96006	b3844, b4117, b2903, b1603, b1380, b1378, b2262	ARGDC, DHNCOAS, FADRx, FE3Ri, FLVRx, GLYCL, LDH_D, POR5, THD2pp
7850	-50.5731	EX_succ_e	7.79606	-7.5	0.285889	6	27.056	-11.7657	-2.84194	20.9378	8.96006	b1261, b3197, b3844, b4117, b2903, b1378	ARGDC, FADRx, FE3Ri, FLVRx, GLYCL, POR5, TRPS1, TRPS2, TRPS3
7851	-50.5731	EX_succ_e	7.79606	-7.5	0.285889	6	27.056	-11.7657	-2.84194	20.9378	8.96006	b3844, b4117, b2903, b1125, b1380, b1378	ARGDC, FADRx, FE3Ri, FLVRx, GLYCL, LDH_D, POR5
7852	-50.5707	EX_succ_e	7.79607	-7.5	0.285887	6	27.0559	-11.7704	-2.84196	20.9378	8.96005	b3844, b0675, b2905, b0929, b1380, b3924	FADRx, FE3Ri, FLDR2, FLVRx, GLYCL, LDH_D
7853	-50.5295	EX_succ_e	7.79187	-7.5	0.288878	9	27.1302	-11.4015	-2.80724	20.948	8.98944	b3844, b4117, b3359, b2903, b0957, b3738, b2678, b1380, b0724	ARGDC, ATPS4rpp, CRNDabcpp, CRNabcpp, CTBTabcpp, FADRx, FE3Ri, FLVRx, GLYCL, LDH_D, PROabcpp, SUCDi
7854	-50.4495	EX_succ_e	7.79852	-7.5	0.284135	7	27.0323	-11.7657	-2.84232	20.9318	8.94282	b1261, b3846, b3197, b3844, b4117, b2903, b1378	ARGDC, CTECOAI6, CTECOAI7, CTECOAI8, FADRx, FE3Ri, FLVRx, GLYCL, POR5, TRPS1, TRPS2, TRPS3
7855	-50.3622	EX_succ_e	7.60776	-7.5	0.290955	4	26.4762	-11.4279	-2.70672	20.3464	8.83651	b0928, b3844, b2463, b1380	CYSTA, FADRx, FE3Ri, FLVRx, LDH_D, ME2
7856	-50.3622	EX_succ_e	7.60776	-7.5	0.290955	4	26.4762	-11.4279	-2.70672	20.3464	8.83651	b3844, b2463, b3927, b1380	FADRx, FE3Ri, FLVRx, GLYALDtpp, GLYtpp, LDH_D, ME2, UREAtpp
7857	-50.2622	EX_succ_e	7.60776	-7.5	0.290955	5	26.4762	-11.4279	-2.70672	20.3464	8.83651	b3844, b2463, b0652, b3927, b1380	ASPabcpp, FADRx, FE3Ri, FLVRx, GLUabcpp, GLYALDtpp, GLYtpp, LDH_D, ME2, UREAtpp
7858	-49.8736	EX_succ_e	7.42688	-7.5	0.290758	2	25.7629	-11.3786	-2.63551	19.7371	8.66129	b3844, b2413	FADRx, FE3Ri, FLVRx, SO4t2pp
7859	-49.7909	EX_succ_e	7.47746	-7.5	0.28624	2	25.8761	-11.7704	-2.65346	19.8703	8.65919	b3844, b1695	ACOAD1fr, FADRx, FE3Ri, FLVRx
7860	-49.79	EX_succ_e	7.47723	-7.5	0.28624	2	25.8752	-11.7704	-2.65337	19.8696	8.65897	b2541, b1695	ACOAD1fr, DHCIND, DHPPD
7861	-49.79	EX_succ_e	7.47723	-7.5	0.28624	2	25.8752	-11.7704	-2.65337	19.8696	8.65897	b1380, b0221	ACOAD1f, ACOAD2f, ACOAD3f, ACOAD4f, ACOAD5f, ACOAD6f, ACOAD7f, ACOAD8f, LDH_D
7862	-49.7801	EX_succ_e	7.42655	-7.5	0.290955	1	25.7653	-11.7704	-2.63547	19.7376	8.66317	b3844	FADRx, FE3Ri, FLVRx
7863	-49.7769	EX_succ_e	7.42655	-7.5	0.290955	2	25.7653	-11.5768	-2.63547	19.7376	8.66317	b3844, b1602	FADRx, FE3Ri, FLVRx, THD2pp
7864	-49.729	EX_succ_e	7.47299	-7.5	0.289189	3	25.9142	-11.7704	-2.65297	19.8793	8.68788	b3846, b3844, b3892	CTECOAI6, CTECOAI7, CTECOAI8, FADRx, FE3Ri, FLVRx
7865	-49.7063	EX_succ_e	7.42655	-7.5	0.290955	3	25.7653	-11.518	-2.63547	19.7376	8.66317	b3844, b1602, b1380	FADRx, FE3Ri, FLVRx, LDH_D, THD2pp
7866	-49.6932	EX_succ_e	7.47746	-7.5	0.28624	3	25.8761	-11.7657	-2.65346	19.8703	8.65919	b2836, b3844, b4117	2AGPEAT120, 2AGPEAT140, 2AGPEAT141, 2AGPEAT160, 2AGPEAT161, 2AGPEAT180, 2AGPEAT181, 2AGPGAT120, 2AGPGAT140, 2AGPGAT141, 2AGPGAT160, 2AGPGAT161, 2AGPGAT180, 2AGPGAT181, AACPS1, AACPS2, AACPS3, AACPS4, AACPS5, AACPS6, AACPS7, AACPS8, AACPS9, ARGDC, FADRx, FE3Ri, FLVRx
7867	-49.6923	EX_succ_e	7.47723	-7.5	0.28624	3	25.8752	-11.7657	-2.65337	19.8696	8.65897	b4115, b0452, b3927	ARGAGMt7pp, FACOAE100, FACOAE120, FACOAE140, FACOAE141, FACOAE160, FACOAE161, FACOAE180, FACOAE181, FACOAE60, FACOAE80, GLYALDtpp, GLYtpp, UREAtpp
7868	-49.6909	EX_succ_e	7.47746	-7.5	0.28624	3	25.8761	-11.7704	-2.65346	19.8703	8.65919	b3844, b2663, b0221	ABUTt2pp, ACOAD1f, ACOAD2f, ACOAD3f, ACOAD4f, ACOAD5f, ACOAD6f, ACOAD7f, ACOAD8f, FADRx, FE3Ri, FLVRx
7869	-49.6909	EX_succ_e	7.47746	-7.5	0.28624	3	25.8761	-11.7704	-2.65346	19.8703	8.65919	b2836, b3844, b2903	2AGPEAT120, 2AGPEAT140, 2AGPEAT141, 2AGPEAT160, 2AGPEAT161, 2AGPEAT180, 2AGPEAT181, 2AGPGAT120, 2AGPGAT140, 2AGPGAT141, 2AGPGAT160, 2AGPGAT161, 2AGPGAT180, 2AGPGAT181, AACPS1, AACPS2, AACPS3, AACPS4, AACPS5, AACPS6, AACPS7, AACPS8, AACPS9, FADRx, FE3Ri, FLVRx, GLYCL
7870	-49.69	EX_succ_e	7.47723	-7.5	0.28624	3	25.8752	-11.7704	-2.65337	19.8696	8.65897	b3503, b1380, b0221	ACOAD1f, ACOAD2f, ACOAD3f, ACOAD4f, ACOAD5f, ACOAD6f, ACOAD7f, ACOAD8f, ASR, LDH_D
7871	-49.69	EX_succ_e	7.47723	-7.5	0.28624	3	25.8752	-11.7704	-2.65337	19.8696	8.65897	b2663, b0221, b0009	ABUTt2pp, ACOAD1f, ACOAD2f, ACOAD3f, ACOAD4f, ACOAD5f, ACOAD6f, ACOAD7f, ACOAD8f, MPTAT
7872	-49.6825	EX_succ_e	7.42655	-7.5	0.290955	2	25.7653	-11.7657	-2.63547	19.7376	8.66317	b3844, b4117	ARGDC, FADRx, FE3Ri, FLVRx
7873	-49.6813	EX_succ_e	7.42689	-7.5	0.29095	2	25.7665	-11.7704	-2.6356	19.7387	8.66344	b3844, b0003	4HTHRK, FADRx, FE3Ri, FLVRx, HSK
7874	-49.6801	EX_succ_e	7.42655	-7.5	0.290955	2	25.7653	-11.7704	-2.63547	19.7376	8.66317	b3844, b0032	CBPS, FADRx, FE3Ri, FLVRx
7876	-49.6801	EX_succ_e	7.42655	-7.5	0.290955	2	25.7653	-11.7704	-2.63547	19.7376	8.66317	b3844, b2903	FADRx, FE3Ri, FLVRx, GLYCL
7878	-49.6801	EX_succ_e	7.42655	-7.5	0.290955	2	25.7653	-11.7704	-2.63547	19.7376	8.66317	b3844, b0662	FADRx, FE3Ri, FLVRx, OMMBLHXy
7879	-49.6801	EX_succ_e	7.42655	-7.5	0.290955	2	25.7653	-11.7704	-2.63547	19.7376	8.66317	b3844, b2264	FADRx, FE3Ri, FLVRx, SEPHCHCS
7880	-49.6801	EX_succ_e	7.42655	-7.5	0.290955	2	25.7653	-11.7704	-2.63547	19.7376	8.66317	b3831, b3844	FADRx, FE3Ri, FLVRx, PYNP2r
7881	-49.6801	EX_succ_e	7.42655	-7.5	0.290955	2	25.7653	-11.7704	-2.63547	19.7376	8.66317	b3844, b0516	ALLTAMH2, FADRx, FE3Ri, FLVRx
7882	-49.6801	EX_succ_e	7.42655	-7.5	0.290955	2	25.7653	-11.7704	-2.63547	19.7376	8.66317	b3844, b4119	FADRx, FE3Ri, FLVRx, GALS3
7883	-49.6801	EX_succ_e	7.42655	-7.5	0.290955	2	25.7653	-11.7704	-2.63547	19.7376	8.66317	b3844, b2700	FADRx, FE3Ri, FLVRx, NMNDA
7884	-49.6801	EX_succ_e	7.42655	-7.5	0.290955	2	25.7653	-11.7704	-2.63547	19.7376	8.66317	b3844, b4367	FADRx, FE3Ri, FEOXAMR1, FEOXAMR2, FEOXAMR3, FLVRx
7885	-49.6801	EX_succ_e	7.42655	-7.5	0.290955	2	25.7653	-11.7704	-2.63547	19.7376	8.66317	b3844, b1014	FADRx, FE3Ri, FLVRx, P5CD, PROD3
7886	-49.6801	EX_succ_e	7.42655	-7.5	0.290955	2	25.7653	-11.7704	-2.63547	19.7376	8.66317	b3844, b1528	ARBt3ipp, FADRx, FE3Ri, FLVRx, MELIBt3ipp
7887	-49.6801	EX_succ_e	7.42655	-7.5	0.290955	2	25.7653	-11.7704	-2.63547	19.7376	8.66317	b2221, b3844	BUTCT, FADRx, FE3Ri, FLVRx, HXCT
7888	-49.6801	EX_succ_e	7.42655	-7.5	0.290955	2	25.7653	-11.7704	-2.63547	19.7376	8.66317	b3844, b3792	ECAtpp, FADRx, FE3Ri, FLVRx
7889	-49.6801	EX_succ_e	7.42655	-7.5	0.290955	2	25.7653	-11.7704	-2.63547	19.7376	8.66317	b3844, b3790	FADRx, FE3Ri, FLVRx, TDPADGAT
7890	-49.6801	EX_succ_e	7.42655	-7.5	0.290955	2	25.7653	-11.7704	-2.63547	19.7376	8.66317	b3844, b3787	FADRx, FE3Ri, FLVRx, UACMAMO
7891	-49.6801	EX_succ_e	7.42655	-7.5	0.290955	2	25.7653	-11.7704	-2.63547	19.7376	8.66317	b2599, b3844	FADRx, FE3Ri, FLVRx, PPNDH
7892	-49.6801	EX_succ_e	7.42655	-7.5	0.290955	2	25.7653	-11.7704	-2.63547	19.7376	8.66317	b3844, b2428	ACM6PH, FADRx, FE3Ri, FLVRx
7893	-49.6801	EX_succ_e	7.42655	-7.5	0.290955	2	25.7653	-11.7704	-2.63547	19.7376	8.66317	b3844, b1119	ACGAMK, FADRx, FE3Ri, FLVRx
7894	-49.6801	EX_succ_e	7.42655	-7.5	0.290955	2	25.7653	-11.7704	-2.63547	19.7376	8.66317	b3844, b4094	FADRx, FE3Ri, FLVRx, R15BPK
7895	-49.6801	EX_succ_e	7.42655	-7.5	0.290955	2	25.7653	-11.7704	-2.63547	19.7376	8.66317	b3844, b2130	CHLabcpp, FADRx, FE3Ri, FLVRx
7896	-49.6801	EX_succ_e	7.42655	-7.5	0.290955	2	25.7653	-11.7704	-2.63547	19.7376	8.66317	b3844, b0511	ALLTNt2rpp, FADRx, FE3Ri, FLVRx
7897	-49.6801	EX_succ_e	7.42655	-7.5	0.290955	2	25.7653	-11.7704	-2.63547	19.7376	8.66317	b0222, b3844	FADRx, FE3Ri, FLVRx, S7PI
7898	-49.6801	EX_succ_e	7.42655	-7.5	0.290955	2	25.7653	-11.7704	-2.63547	19.7376	8.66317	b3844, b2200	FADRx, FE3Ri, FLVRx, PHEMEabcpp
7899	-49.6801	EX_succ_e	7.42655	-7.5	0.290955	2	25.7653	-11.7704	-2.63547	19.7376	8.66317	b3844, b0729	FADRx, FE3Ri, FLVRx, SUCOAS
7900	-49.6801	EX_succ_e	7.42655	-7.5	0.290955	2	25.7653	-11.7704	-2.63547	19.7376	8.66317	b3073, b3844	FADRx, FE3Ri, FLVRx, PTRCTA
7901	-49.6801	EX_succ_e	7.42655	-7.5	0.290955	2	25.7653	-11.7704	-2.63547	19.7376	8.66317	b3844, b2938	ARGDCpp, FADRx, FE3Ri, FLVRx
7902	-49.6801	EX_succ_e	7.42655	-7.5	0.290955	2	25.7653	-11.7704	-2.63547	19.7376	8.66317	b3844, b2943	FADRx, FE3Ri, FLVRx, GALt2pp, GLCt2pp
7903	-49.6801	EX_succ_e	7.42655	-7.5	0.290955	2	25.7653	-11.7704	-2.63547	19.7376	8.66317	b3844, b3460	ALAabcpp, FADRx, FE3Ri, FLVRx, ILEabcpp, THRabcpp, VALabcpp
7904	-49.6801	EX_succ_e	7.42655	-7.5	0.290955	2	25.7653	-11.7704	-2.63547	19.7376	8.66317	b1398, b3844	FADRx, FE3Ri, FLVRx, PACCOAL
7905	-49.6801	EX_succ_e	7.42655	-7.5	0.290955	2	25.7653	-11.7704	-2.63547	19.7376	8.66317	b3844, b0724	FADRx, FE3Ri, FLVRx, SUCDi
7906	-49.6801	EX_succ_e	7.42655	-7.5	0.290955	2	25.7653	-11.7704	-2.63547	19.7376	8.66317	b3844, b2866	FADRx, FE3Ri, FLVRx, HXAND, XAND
7907	-49.6801	EX_succ_e	7.42655	-7.5	0.290955	2	25.7653	-11.7704	-2.63547	19.7376	8.66317	b3844, b1387	FADRx, FE3Ri, FLVRx, OXCOAHDH
7908	-49.6801	EX_succ_e	7.42655	-7.5	0.290955	2	25.7653	-11.7704	-2.63547	19.7376	8.66317	b3844, b1395	FADRx, FE3Ri, FLVRx, HADPCOADH3
7909	-49.6801	EX_succ_e	7.42655	-7.5	0.290955	2	25.7653	-11.7704	-2.63547	19.7376	8.66317	b3844, b4115	ARGAGMt7pp, FADRx, FE3Ri, FLVRx
7910	-49.6801	EX_succ_e	7.42655	-7.5	0.290955	2	25.7653	-11.7704	-2.63547	19.7376	8.66317	b0871, b3844	FADRx, FE3Ri, FLVRx, POX
7911	-49.6801	EX_succ_e	7.42655	-7.5	0.290955	2	25.7653	-11.7704	-2.63547	19.7376	8.66317	b3844, b2210	FADRx, FE3Ri, FLVRx, MDH2, MDH3
7912	-49.6801	EX_succ_e	7.42655	-7.5	0.290955	2	25.7653	-11.7704	-2.63547	19.7376	8.66317	b3844, b0430	CYTBO3_4pp, FADRx, FE3Ri, FLVRx
7914	-49.6801	EX_succ_e	7.42655	-7.5	0.290955	2	25.7653	-11.7704	-2.63547	19.7376	8.66317	b3844, b3528	ASPt2_2pp, FADRx, FE3Ri, FLVRx, FUMt2_2pp, MALDt2_2pp, MALt2_2pp, OROTt2_2pp
7915	-49.6801	EX_succ_e	7.42655	-7.5	0.290955	2	25.7653	-11.7704	-2.63547	19.7376	8.66317	b3844, b1533	FADRx, FE3Ri, FLVRx, SERtpp
7916	-49.6801	EX_succ_e	7.42655	-7.5	0.290955	2	25.7653	-11.7704	-2.63547	19.7376	8.66317	b3844, b4238	FADRx, FE3Ri, FLVRx, RNTR1c2, RNTR2c2, RNTR3c2, RNTR4c2
7917	-49.6801	EX_succ_e	7.42655	-7.5	0.290955	2	25.7653	-11.7704	-2.63547	19.7376	8.66317	b3844, b1516	AI2abcpp, FADRx, FE3Ri, FLVRx
7918	-49.6801	EX_succ_e	7.42655	-7.5	0.290955	2	25.7653	-11.7704	-2.63547	19.7376	8.66317	b3844, b1192	4PCP, AGM4PCP, AM4PCP, FADRx, FE3Ri, FLVRx, UM4PCP
7919	-49.6801	EX_succ_e	7.42655	-7.5	0.290955	2	25.7653	-11.7704	-2.63547	19.7376	8.66317	b3844, b0151	ARBTNabcpp, CPGNabcpp, FADRx, FE3HOXabcpp, FE3Ri, FECRMabcpp, FEOXAMabcpp, FLVRx
7920	-49.6801	EX_succ_e	7.42655	-7.5	0.290955	2	25.7653	-11.7704	-2.63547	19.7376	8.66317	b3844, b1238	DURIK1, FADRx, FE3Ri, FLVRx, TMDK1
7921	-49.6801	EX_succ_e	7.42655	-7.5	0.290955	2	25.7653	-11.7704	-2.63547	19.7376	8.66317	b3844, b1012	FADRx, FE3Ri, FLVRx, PYROX
7922	-49.6801	EX_succ_e	7.42655	-7.5	0.290955	2	25.7653	-11.7704	-2.63547	19.7376	8.66317	b3844, b3927	FADRx, FE3Ri, FLVRx, GLYALDtpp, GLYtpp, UREAtpp
7923	-49.6801	EX_succ_e	7.42655	-7.5	0.290955	2	25.7653	-11.7704	-2.63547	19.7376	8.66317	b3844, b2149	FADRx, FE3Ri, FLVRx, GLCabcpp
7924	-49.6801	EX_succ_e	7.42655	-7.5	0.290955	2	25.7653	-11.7704	-2.63547	19.7376	8.66317	b3844, b0594	DHBS, FADRx, FE3Ri, FLVRx
7925	-49.6801	EX_succ_e	7.42655	-7.5	0.290955	2	25.7653	-11.7704	-2.63547	19.7376	8.66317	b3844, b0583	ENTCS, FADRx, FE3Ri, FLVRx
7926	-49.6801	EX_succ_e	7.42655	-7.5	0.290955	2	25.7653	-11.7704	-2.63547	19.7376	8.66317	b3844, b0757	FADRx, FE3Ri, FLVRx, GALKr
7927	-49.6801	EX_succ_e	7.42655	-7.5	0.290955	2	25.7653	-11.7704	-2.63547	19.7376	8.66317	b3844, b0758	FADRx, FE3Ri, FLVRx, UGLT
7928	-49.6801	EX_succ_e	7.42655	-7.5	0.290955	2	25.7653	-11.7704	-2.63547	19.7376	8.66317	b3844, b3457	ALAabcpp, FADRx, FE3Ri, FLVRx, ILEabcpp, LEUabcpp, THRabcpp, VALabcpp
7930	-49.6801	EX_succ_e	7.42655	-7.5	0.290955	2	25.7653	-11.7704	-2.63547	19.7376	8.66317	b3844, b2308	FADRx, FE3Ri, FLVRx, HISabcpp, LYSabcpp, ORNabcpp
7931	-49.6801	EX_succ_e	7.42655	-7.5	0.290955	2	25.7653	-11.7704	-2.63547	19.7376	8.66317	b3844, b0312	BETALDHx, BETALDHy, FADRx, FE3Ri, FLVRx
7932	-49.6801	EX_succ_e	7.42655	-7.5	0.290955	2	25.7653	-11.7704	-2.63547	19.7376	8.66317	b3844, b0592	DHBSZ3FEabcpp, FADRx, FE3Ri, FEENTERabcpp, FLVRx
7934	-49.6801	EX_succ_e	7.42655	-7.5	0.290955	2	25.7653	-11.7704	-2.63547	19.7376	8.66317	b3844, b0591	FADRx, FE3Ri, FEENTERtpp, FLVRx
7935	-49.6801	EX_succ_e	7.42655	-7.5	0.290955	2	25.7653	-11.7704	-2.63547	19.7376	8.66317	b3844, b3779	FADRx, FE3Ri, FLVRx, GTPDPDP
7936	-49.6801	EX_succ_e	7.42655	-7.5	0.290955	2	25.7653	-11.7704	-2.63547	19.7376	8.66317	b3844, b2889	FADRx, FE3Ri, FLVRx, IPDDI
7937	-49.6801	EX_succ_e	7.42655	-7.5	0.290955	2	25.7653	-11.7704	-2.63547	19.7376	8.66317	b3844, b0150	FADRx, FE3HOXtonex, FE3Ri, FECRMtonex, FEOXAMtonex, FLVRx
7938	-49.6801	EX_succ_e	7.42655	-7.5	0.290955	2	25.7653	-11.7704	-2.63547	19.7376	8.66317	b3844, b1326	FADRx, FE3Ri, FLVRx, LADGMDH
7946	-49.6801	EX_succ_e	7.42655	-7.5	0.290955	2	25.7653	-11.7704	-2.63547	19.7376	8.66317	b3844, b3877	DHPStr, FADRx, FE3Ri, FLVRx
7954	-49.6801	EX_succ_e	7.42655	-7.5	0.290955	2	25.7653	-11.7704	-2.63547	19.7376	8.66317	b3844, b2165	FADRx, FE3Ri, FLVRx, YUMPS
7955	-49.6801	EX_succ_e	7.42655	-7.5	0.290955	2	25.7653	-11.7704	-2.63547	19.7376	8.66317	b3225, b3844	ACNML, FADRx, FE3Ri, FLVRx
7956	-49.6801	EX_succ_e	7.42655	-7.5	0.290955	2	25.7653	-11.7704	-2.63547	19.7376	8.66317	b3693, b3844	DDGALK, FADRx, FE3Ri, FLVRx
7957	-49.6801	EX_succ_e	7.42655	-7.5	0.290955	2	25.7653	-11.7704	-2.63547	19.7376	8.66317	b3844, b2711	FADRx, FE3Ri, FLVRx, NHFRBO
7961	-49.6801	EX_succ_e	7.42655	-7.5	0.290955	2	25.7653	-11.7704	-2.63547	19.7376	8.66317	b3844, b0444	CCGS, FADRx, FE3Ri, FLVRx
7964	-49.6801	EX_succ_e	7.42655	-7.5	0.290955	2	25.7653	-11.7704	-2.63547	19.7376	8.66317	b3844, b0756	FADRx, FE3Ri, FLVRx, GALM2pp
7965	-49.6801	EX_succ_e	7.42655	-7.5	0.290955	2	25.7653	-11.7704	-2.63547	19.7376	8.66317	b3844, b1106	FADRx, FE3Ri, FLVRx, TMK
7968	-49.6801	EX_succ_e	7.42655	-7.5	0.290955	2	25.7653	-11.7704	-2.63547	19.7376	8.66317	b3844, b4192	ASCBPL, FADRx, FE3Ri, FLVRx
7970	-49.6801	EX_succ_e	7.42655	-7.5	0.290955	2	25.7653	-11.7704	-2.63547	19.7376	8.66317	b3844, b4033	14GLUCANabcpp, FADRx, FE3Ri, FLVRx, MALTHXabcpp, MALTPTabcpp, MALTTRabcpp, MALTTTRabcpp, MALTabcpp
7972	-49.6801	EX_succ_e	7.42655	-7.5	0.290955	2	25.7653	-11.7704	-2.63547	19.7376	8.66317	b3844, b1386	42A12BOOXpp, FADRx, FE3Ri, FLVRx, PEAMNOpp, TYROXDApp
7979	-49.6801	EX_succ_e	7.42655	-7.5	0.290955	2	25.7653	-11.7704	-2.63547	19.7376	8.66317	b3844, b3656	FADRx, FE3Ri, FLVRx, XYHDL
7982	-49.6801	EX_succ_e	7.42655	-7.5	0.290955	2	25.7653	-11.7704	-2.63547	19.7376	8.66317	b3844, b0340	CYNTAH, FADRx, FE3Ri, FLVRx
7985	-49.6801	EX_succ_e	7.42655	-7.5	0.290955	2	25.7653	-11.7704	-2.63547	19.7376	8.66317	b3844, b1711	ADOCBLabcpp, CBIuabcpp, CBL1abcpp, FADRx, FE3Ri, FLVRx
7987	-49.6801	EX_succ_e	7.42655	-7.5	0.290955	2	25.7653	-11.7704	-2.63547	19.7376	8.66317	b3844, b1737	CHTBSptspp, FADRx, FE3Ri, FLVRx
7989	-49.6801	EX_succ_e	7.42655	-7.5	0.290955	2	25.7653	-11.7704	-2.63547	19.7376	8.66317	b3844, b2147	DURADx, FADRx, FE3Ri, FLVRx
7993	-49.6801	EX_succ_e	7.42655	-7.5	0.290955	2	25.7653	-11.7704	-2.63547	19.7376	8.66317	b3844, b1981	FADRx, FE3Ri, FLVRx, SKMt2pp
7996	-49.6801	EX_succ_e	7.42655	-7.5	0.290955	2	25.7653	-11.7704	-2.63547	19.7376	8.66317	b3844, b0783	CPMPS, FADRx, FE3Ri, FLVRx
7997	-49.6801	EX_succ_e	7.42655	-7.5	0.290955	2	25.7653	-11.7704	-2.63547	19.7376	8.66317	b3844, b0624	FADRx, FE3Ri, FLVRx, Ftpp
7998	-49.6801	EX_succ_e	7.42655	-7.5	0.290955	2	25.7653	-11.7704	-2.63547	19.7376	8.66317	b3844, b1584	FADRx, FE3Ri, FLVRx, SPMDAT1, SPMDAT2
8000	-49.6801	EX_succ_e	7.42655	-7.5	0.290955	2	25.7653	-11.7704	-2.63547	19.7376	8.66317	b3844, b2843	FADRx, FE3Ri, FLVRx, KDUI
