# Supplementary material
Source: MDPI journal article supplement (https://www.mdpi.com/2311-5637/9/6/531)
Supplement: s1 [file s1 › SI2_SupplSustInd.xlsx]

## Sheet: economic
Metabolite	Price per ton USD	Cost per ton USD	KeggID	Molar mass g/mol	Economic sustainability indicator 1e-4 (USD/mmol)	Notes
Acrylic acid	3021	852.615	C00511	72	1.56124
Adipic acid	3733	2150.38	C06104	146	2.31062	https://www.chemanalyst.com/Pricing-data/adipic-acid-1106
Citric acid	1980	782.462	C00158	192	2.29927	https://www.chemanalyst.com/Pricing-data/citric-acid-1438
Ethanol	1180	349.692	C00469	46	0.381941
Ethylene	1000	722.231	C06547	28	0.0777754
glucose	579		C00031	180	1.0422	https://www.selinawamucii.com/insights/prices/united-states-of-america/glucose/
Lactic acid	1240	757.923	C00186	90	0.433869	https://www.echemi.com/productsInformation/pd20150901239-lactic-acid.html
Malic acid	4910	430	C00149	135	6.048	https://www.chemanalyst.com/Pricing-data/malic-acid-1281#:~:text=Demand%20has%20fluctuated%20frequently%20for,New%20York%20in%20September%202022. https://www.sciencedirect.com/science/article/pii/S0960852422002851
Succinic acid	3630	783	C00042	118	3.35946	https://www.chemanalyst.com/Pricing-data/succinic-acid-1270
NH4	91.909		C00014; C01342	18	0.0165436
SO4	245.091		C00059	96	0.235287
Biomass	5020	4190			8.3	USD/gDW

## Sheet: environmental
Metabolite	Production system	NREU GJ/t	CO2 eq kg / ton	Land use ha/t	KeggID	Molar mass	Environmental sustainability indicator 1e-4 (USD/mmol)	notes
Acrylic acid	BioAcryl-Anaer-GA-Fex	4.4	490.12	0.18	C00511	72	0.0219	from Brew project
Adipic acid	BioAdip-Aer-GA-Tc	85.7	9546.12	0.75	C06104	146	0.8641	from Brew project
Citric acid	BioCit-Aer-SRI-Tevc	73.7	8209.44	0.01	C00158	192	0.9773	from Brew project
CO2		8.98	1000		C00011	44	0.0273	401 kg to produce 3600 MJ
Ethanol	BioEtOH-SRI-Td	-13.7	-1526.04	0.29	C00469	46	-0.0435	from Brew project
Ethylene	BioEthylene-BioEtOH-Anaer-GA-Td	-29.9	-3330.56	0.48	C06547	28	-0.0578	from Brew project
Lactic acid	BioLA-SRI-TpH6cont	15.7	1748.82	0.15	C00186	90	0.0976	from Brew project
Malic acid		16.37	1823.84	0.26	C00149	135	0.1527	https://www.sciencedirect.com/science/article/pii/S0960852422002851 ; land use added the same as succinic acid
Succinic acid	BioSA-Anaer-GA-Tc	44.9	5001.41	0.26	C00042	118	0.3659	from Brew project
NH4		0	0	0	C00014; C01342	18	0
SO4		0	0	0	C00059	96	0
Biomass			440	0			0.2728	USD/gDW

## Sheet: social
Metabolite	Price per ton USD	KeggID	Molar mass	Social sustainability indicator 1e-4 (USD/mmol)	Notes
Acrylic acid	3021	C00511	72	0.485777
Adipic acid	3733	C06104	146	1.21721
Citric acid	1980	C00158	192	0.849024
Ethanol	1180	C00469	46	0.121225
Ethylene	1000	C06547	28	0.0625333	https://ec.europa.eu/eurostat/web/products-eurostat-news/w/ddn-20221219-3#:~:text=In%202021%2C%20the%20average%20annual,indicator%20for%20the%20first%20time.
glucose	579	C00031	180	0.232758
Lactic acid	1240	C00186	90	0.24924
Malic acid	4910	C00149	135	1.48036
Succinic acid	3630	C00042	118	0.956626
NH4	91.909	C00014; C01342	18	0
SO4	245.091	C00059	96	0
biomass	5020			11.2113	USD/gDW
